# Supplementary material for: Organocatalytic asymmetric cascade bicyclization: access to chiral polycyclic bisindoles from 2-indolylmethanols and propargylic alcohols
Source: Royal Society of Chemistry journal article supplement (doi:10.1039/d3qo01558k), 2024-01-01
Supplement: d3qo01558k1.pdf [file d3qo01558k1.pdf]

## Supporting Information

### **Organocatalytic asymmetric cascade bicyclization: Access to chiral polycyclic bisindoles from 2- indolylmethanols and propargylic alcohols**

Wen-Run Zhu,<sup>‡a,b</sup> Qiong Su,<sup>‡a</sup> Xiao-Yi Deng,<sup>a</sup> Ze-Long Ouyang,<sup>a</sup> Jiang Weng<sup>\*a</sup> and  
Gui Lu<sup>\*a</sup>

<sup>a</sup> Guangdong Provincial Key Laboratory of New Drug Design and Evaluation, Guangdong Provincial Key Laboratory of Chiral Molecule and Drug Discovery, School of Pharmaceutical Sciences, Sun Yat-sen University, Guangzhou, 510006, P.R. China. E-mail: wengj2@mail.sysu.edu.cn, lugui@mail.sysu.edu.cn

<sup>b</sup> School of Pharmacy, Guangdong Pharmaceutical University, Guangzhou, 510006, P.R. China.

## Table of Contents

|                                                                        |            |
|------------------------------------------------------------------------|------------|
| <b>1. General Information</b>                                          | <b>S3</b>  |
| <b>2. Screening of Catalysts and Condition Optimization</b>            | <b>S3</b>  |
| <b>3. Experimental Procedure and Characterization of Substrates</b>    | <b>S6</b>  |
| <b>a. General Procedure to Prepare Substrates 1 and 8</b>              | <b>S6</b>  |
| <b>4. Experimental Procedure and Characterization of Products</b>      | <b>S6</b>  |
| <b>a. General Procedure to Prepare Racemic Products 3a-3w, 5, 7, 9</b> | <b>S6</b>  |
| <b>b. General Procedure to Prepare Chiral Products 3a-3w, 5, 7, 9</b>  | <b>S6</b>  |
| <b>c. Analytical Data for Products 3a-3w, 5, 7, 9</b>                  | <b>S7</b>  |
| <b>5. References</b>                                                   | <b>S17</b> |
| <b>6. Data for X-ray Crystal Structure of 3e</b>                       | <b>S18</b> |
| <b>7. Copies of NMR Spectra</b>                                        | <b>S19</b> |
| <b>8. Copies of HPLC Spectra</b>                                       | <b>S57</b> |
| <b>9. Plausible Reaction Mechanism</b>                                 | <b>S83</b> |
| <b>10. Results of DFT Calculations</b>                                 | <b>S84</b> |

## 1. General Information

All reactions were carried out in oven-dried reaction vessel unless otherwise noted and solvents were dried according to established procedures. Reactions were monitored by thin layer chromatography (TLC). Purification of reaction product was carried out by flash chromatography using Qing Dao Sea Chemical Reagent silica gel (200-300 mesh).  $^1\text{H}$ ,  $^{13}\text{C}$  and  $^{19}\text{F}$  NMR spectra were recorded on Bruker 400 MHz or 500 MHz spectrometer in  $\text{CDCl}_3$  unless otherwise noted. Chemical shifts in  $^1\text{H}$  NMR spectra are reported in parts per million (ppm,  $\delta$ ) downfield from the internal standard  $\text{Me}_4\text{Si}$  (TMS,  $\delta = 0$  ppm). Chemical shifts in  $^{13}\text{C}$  NMR spectra are reported relative to the central line of the chloroform signal ( $\delta = 77.0$  ppm). Data are presented as follows: chemical shift, integration, multiplicity (s = singlet, d = doublet, t = triplet, q = quartet, m = multiplet) and coupling constant in Hertz (Hz). HPLC analyses were conducted on an Agilent instrument using Daicel Chiralpak IA, IB, AD-H or Chiralcel OD-H columns. High resolution mass spectra were obtained with a Shimadzu LCMS-IT-TOF mass spectrometer. The single crystal X-ray diffraction studies were carried out on a Xcalibur Onyx Nova diffractometer equipped with  $\text{CuK}\alpha$  radiation.

Substrates **1** and **2** were synthesized according to the literature method.<sup>1</sup>

## 2. Screening of Catalysts and Condition Optimization

**Table S1.** Screening of catalysts and optimization of reaction conditions<sup>[a]</sup>

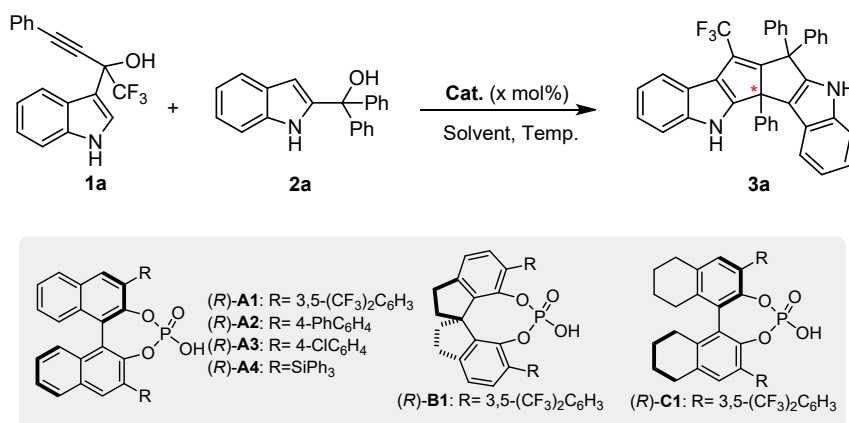

| Entry | Catalyst (x mol%) | Solvent (x mL)      | <b>1a</b> :<br><b>2a</b> | Temperature (°C) | Additive (x mg) | Time | Yield <sup>[b]</sup> (%) | <i>e</i> <sup>[c]</sup> |
|-------|-------------------|---------------------|--------------------------|------------------|-----------------|------|--------------------------|-------------------------|
| 1     | <b>DPP</b> (10)   | DCM (1)             | 1:1                      | RT               | --              | 12h  | 89                       | 50:50                   |
| 2     | (R)-A1 (10)       | DCM (1)             | 1:1                      | RT               | --              | 36h  | 60                       | 90:10                   |
| 3     | (R)-A2 (10)       | DCM (1)             | 1:1                      | RT               | --              | 12h  | 86                       | 57:43                   |
| 4     | (R)-A3 (10)       | DCM (1)             | 1:1                      | RT               | --              | 12h  | 78                       | 52:48                   |
| 5     | (R)-A4 (10)       | DCM (1)             | 1:1                      | RT               | --              | 96h  | 30                       | 40:60                   |
| 6     | (R)-B1 (10)       | DCM (1)             | 1:1                      | RT               | --              | 96h  | 25                       | 93:7                    |
| 7     | (R)-C1 (10)       | DCM (1)             | 1:1                      | RT               | --              | 48h  | 56                       | 93:7                    |
| 8     | (R)-C1 (10)       | Tol (1)             | 1:1                      | RT               | --              | 48h  | 80                       | 88:12                   |
| 9     | (R)-C1 (10)       | DCE (1)             | 1:1                      | RT               | --              | 72h  | 65                       | 93:7                    |
| 10    | (R)-C1 (10)       | $\text{CHCl}_3$ (1) | 1:1                      | RT               | --              | 72h  | 46                       | 61:19                   |

|    |                |                                         |       |    |                                                            |      |       |          |
|----|----------------|-----------------------------------------|-------|----|------------------------------------------------------------|------|-------|----------|
| 11 | (R)-C1<br>(10) | CCl <sub>4</sub> (1)                    | 1:1   | RT | --                                                         | 72h  | 86    | 89:11    |
| 12 | (R)-C1<br>(10) | Mesitylene (1)                          | 1:1   | RT | --                                                         | 24h  | 65    | 78:22    |
| 13 | (R)-C1<br>(10) | PhCF <sub>3</sub> (1)                   | 1:1   | RT | --                                                         | 24h  | 86    | 85:15    |
| 14 | (R)-C1<br>(10) | PhCl (1)                                | 1:1   | RT | --                                                         | 48h  | 85    | 90:10    |
| 15 | (R)-C1<br>(10) | CHCl <sub>2</sub> CHCl <sub>2</sub> (1) | 1:1   | RT | --                                                         | 72h  | 45    | 86:14    |
| 16 | (R)-C1<br>(10) | DCM (1)                                 | 1:1   | 10 | --                                                         | 5d   | 30    | 90:10    |
| 17 | (R)-C1<br>(10) | DCM (1)                                 | 1:1   | 20 | --                                                         | 5d   | 40    | 92:8     |
| 18 | (R)-C1<br>(10) | DCM (1)                                 | 1:1.2 | RT | --                                                         | 36h  | 60    | 95:5     |
| 19 | (R)-C1<br>(10) | DCM (1)                                 | 1:1   | RT | B(C <sub>6</sub> F <sub>5</sub> ) <sub>3</sub><br>(5 mol%) | 36h  | 55    | 73:27    |
| 20 | (R)-C1<br>(10) | DCM (1)                                 | 1:1   | RT | HFIP<br>(60 mol%)                                          | 48h  | 56    | 87:13    |
| 21 | (R)-C1<br>(10) | DCM/Tol=1:1 (1)                         | 1:1   | RT | --                                                         | 48h  | 75    | 93:7     |
| 22 | (R)-C1<br>(10) | DCM/Tol=3:1 (1)                         | 1:1   | RT | --                                                         | 5d   | 72    | 93:7     |
| 23 | (R)-C1<br>(10) | DCM/Tol=3:1 (1)                         | 1:1   | RT | MgSO <sub>4</sub><br>(25)                                  | 3d   | 75    | 93:7     |
| 24 | (R)-C1<br>(10) | DCM/Tol=3:1 (1)                         | 1:1   | RT | Na <sub>2</sub> SO <sub>4</sub><br>(25)                    | 3d   | 60    | 93:7     |
| 25 | (R)-C1<br>(10) | DCM/Tol=3:1 (1)                         | 1:1   | RT | 3Å MS (25)                                                 | 5d   | trace | --       |
| 26 | (R)-C1<br>(10) | DCM/Tol=3:1 (1)                         | 1:1   | RT | 4Å MS (25)                                                 | 5d   | trace | --       |
| 27 | (R)-C1<br>(10) | DCM/Tol=3:1 (1)                         | 1:1   | RT | 5Å MS (25)                                                 | 5d   | 45    | 97:3     |
| 28 | (R)-C1<br>(10) | DCM/PhCl=3:1 (1)                        | 1:1   | RT | --                                                         | 3d   | 75    | 93:7     |
| 29 | (R)-C1<br>(10) | DCM/Tol=3:1 (1)                         | 1:1   | RT | --                                                         | 4.5d | 72    | 93:7     |
| 30 | (R)-C1<br>(10) | DCM/CCl <sub>4</sub> =3:1 (1)           | 1:1   | RT | --                                                         | 4.5d | 80    | 90:10    |
| 31 | (R)-C1<br>(10) | DCE/CCl <sub>4</sub> =3:1 (1)           | 1:1   | RT | --                                                         | 6d   | 85    | 94:6     |
| 32 | (R)-C1<br>(10) | DCE/CCl <sub>4</sub> =3:1 (1)           | 1:1   | RT | --                                                         | 4.5d | 86    | 93.5:6.5 |
| 33 | (R)-C1<br>(10) | DCE/CCl <sub>4</sub> =1:1 (1)           | 1:1   | RT | --                                                         | 4.5d | 89    | 93.5:6.5 |
| 34 | (R)-C1<br>(10) | DCE/CCl <sub>4</sub> =3:1 (1)           | 1:1   | RT | --                                                         | 3d   | 85    | 93:7     |
| 35 | (R)-C1<br>(10) | DCM:Tol=3:1 (1)                         | 1:1   | RT | --                                                         | 3d   | 90    | 90:10    |
| 36 | (R)-C1<br>(10) | DCM/Tol=3:1 (1)                         | 1:1   | RT | --                                                         | 3d   | 90    | 90:10    |
| 37 | (R)-C1<br>(10) | DCM/Tol=3:1 (1)                         | 1:1   | RT | 5Å MS (30)                                                 | 5d   | 45    | 97:3     |
| 38 | (R)-C1<br>(10) | DCM/Tol=3:1 (1)                         | 1:1   | RT | 5Å MS (15)                                                 | 5d   | 43    | 97:3     |
| 39 | (R)-C1<br>(10) | DCM/CCl <sub>4</sub> =3:1 (1)           | 1:1   | RT | 5Å MS (15)                                                 | 9d   | 34    | 96:4     |

|           |                                            |                                    |            |           |                                         |            |           |             |
|-----------|--------------------------------------------|------------------------------------|------------|-----------|-----------------------------------------|------------|-----------|-------------|
| 40        | ( <i>R</i> )- <b>C1</b><br>(10)            | DCE/CCl <sub>4</sub> =3:1 (1)      | 1:1        | RT        | 5Å MS (15)                              | 12d        | <5        | --          |
| 41        | ( <i>R</i> )- <b>C1</b><br>(10)            | DCE/CCl <sub>4</sub> =3:1 (1)      | 1:1        | 30        | 5Å MS (15)                              | 10d        | 40        | 97.5:2.5    |
| 42        | ( <i>R</i> )- <b>C1</b><br>(10)            | DCE/CCl <sub>4</sub> =3:1 (1)      | 1:1        | 40        | 5Å MS (15)                              | 3d         | 45        | 97.5:2.5    |
| 43        | ( <i>R</i> )- <b>C1</b><br>(10)            | DCE/CCl <sub>4</sub> =3:1 (1)      | 1:1        | 50        | 5Å MS (15)                              | 3d         | 40        | 97.5:2.5    |
| 44        | ( <i>R</i> )- <b>C1</b><br>(10)            | DCE/CCl <sub>4</sub> =3:1 (1)      | 1:1        | 40        | 5Å MS (3)                               | 3d         | 82        | 96:4        |
| 45        | ( <i>R</i> )- <b>C1</b><br>(10)            | DCE/CCl <sub>4</sub> =3:1 (1)      | 1:1        | 40        | 5Å MS (1)                               | 3d         | 90        | 96:4        |
| 46        | ( <i>R</i> )- <b>C1</b><br>(10)            | DCE/CCl <sub>4</sub> =3:1 (1)      | 1:1        | 30        | MgSO <sub>4</sub><br>(30)               | 4.5d       | 85        | 96.5:3.5    |
| 47        | ( <i>R</i> )- <b>C1</b><br>(10)            | DCE/CCl <sub>4</sub> =3:1 (1)      | 1:1        | 30        | Na <sub>2</sub> SO <sub>4</sub><br>(30) | 4.5d       | 85        | 96:4        |
| 48        | ( <i>R</i> )- <b>C1</b><br>(10)            | DCE/CCl <sub>4</sub> =3:1<br>(0.6) | 1:1        | 40        | 5Å MS (1)                               | 3d         | 87        | 95:5        |
| <b>49</b> | <b>(<i>R</i>)-<b>C1</b></b><br><b>(10)</b> | <b>DCE/CCl<sub>4</sub>=1:1 (1)</b> | <b>1:1</b> | <b>40</b> | <b>5Å MS (1)</b>                        | <b>2d</b>  | <b>83</b> | <b>96:4</b> |
| 50        | ( <i>R</i> )- <b>C1</b><br>(10)            | DCE/CCl <sub>4</sub> =1:1<br>(0.6) | 1:1        | 40        | 5Å MS (1)                               | 2d         | 86        | 95:5        |
| 51        | ( <i>R</i> )- <b>C1</b><br>(10)            | DCE/CCl <sub>4</sub> =3:1 (1)      | 1:1.2      | 40        | 5Å MS (1)                               | 3d         | 78        | 96:4        |
| 52        | ( <i>R</i> )- <b>C1</b><br>(10)            | DCE/CCl <sub>4</sub> =3:1 (1)      | 1.2:1      | 40        | 5Å MS (1)                               | 3d         | 77        | 96:4        |
| 53        | ( <i>R</i> )- <b>C1</b><br>(10)            | DCE/CCl <sub>4</sub> =3:1<br>(0.6) | 1:1        | 30        | MgSO <sub>4</sub><br>(30)               | 69h        | 78        | 95:5        |
| <b>54</b> | <b>(<i>R</i>)-<b>C1</b></b><br><b>(10)</b> | <b>DCE/CCl<sub>4</sub>=1:1 (1)</b> | <b>1:1</b> | <b>30</b> | <b>MgSO<sub>4</sub></b><br><b>(30)</b>  | <b>91h</b> | <b>82</b> | <b>96:4</b> |
| 55        | ( <i>R</i> )- <b>C1</b><br>(10)            | DCE/CCl <sub>4</sub> =1:1<br>(0.6) | 1:1        | 30        | MgSO <sub>4</sub><br>(30)               | 69h        | 86        | 94:6        |
| 56        | ( <i>R</i> )- <b>C1</b><br>(10)            | DCE/CCl <sub>4</sub> =3:1 (1)      | 1:1        | 40        | MgSO <sub>4</sub><br>(30)               | 45h        | 80        | 96:4        |

[a] Unless otherwise specified, all reactions were carried out with catalyst (x mol%), **1a** (0.05 mmol) and **2a** (0.05 mmol) in the indicated solvent (x mL) at room temperature. [b] Isolated yield of **3a**. [c] Determined by chiral-phase HPLC analysis.

### 3. Experimental Procedure and Characterization of Substrates

#### a. General Procedure to Prepare Substrates 1 and 8

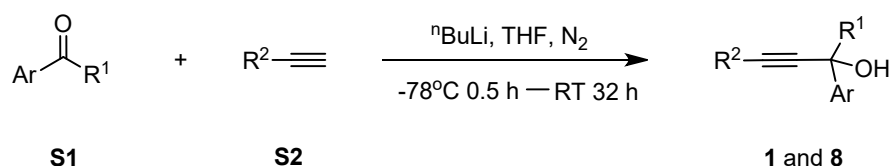

At -78 °C, under N<sub>2</sub>, to a flame-dried flask charged with a solution of the terminal alkyne **S2** (6 mmol, 3 equiv.) in dry THF (15 mL) was added <sup>n</sup>BuLi (6 mmol, 2.5 mL, 2.4 M in hexane) dropwise. The reaction was stirred for 0.5 h at the same temperature and then a solution of the corresponding ketones **S1** (2 mmol, 1.0 equiv.) in THF (5 mL) was added via syringe. The reaction mixture was then slowly warmed up to room temperature and stirred for 32 h. Upon completion, the reaction mixture was cooled to 0 °C and a saturated aqueous NH<sub>4</sub>Cl solution (7 mL) was added dropwise. The organic layer was separated. The aqueous layer was extracted with ethyl acetate (3×10 mL). The combined organic layers were washed with brine (30 mL), dried over anhydrous Na<sub>2</sub>SO<sub>4</sub>, filtered, and concentrated. The crude product was purified directly by flash column chromatography on silica gel (petroleum ether/ ethyl acetate = 10:1~5:1) or recrystallization to give the desired propargylic alcohols **1** and **8**.

### 4. Experimental Procedure and Characterization of Products

#### a. General Procedure to Prepare Racemic Products 3a-3w, 5, 7, 9

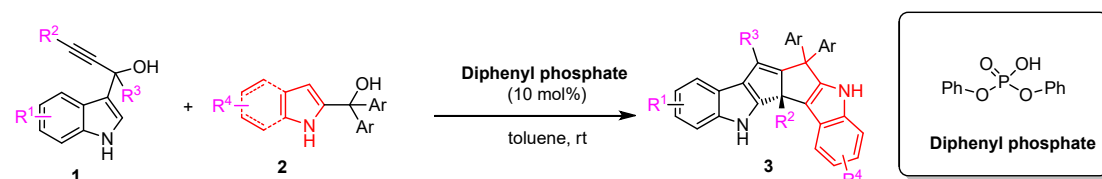

To a solution of  $\alpha$ -indolyl propargylic alcohol **1** (0.10 mmol, 1.0 equiv.), and catalyst diphenyl phosphate (0.01 mmol, 10 mol%) in toluene (1 mL) was added 2-indolylmethanol **2** (0.01 mmol, 1.0 equiv.). The mixture was stirred at room temperature until the reaction was completed (monitored by TLC analysis). The crude product was purified directly by flash column chromatography on silica gel (petroleum ether/ ethyl acetate =30:1~20:1) to give the desired racemic products **3a-3w, 5, 7, 9**.

#### b. General Procedure to Prepare Chiral Products 3a-3w, 5, 7, 9

##### Conditions A:

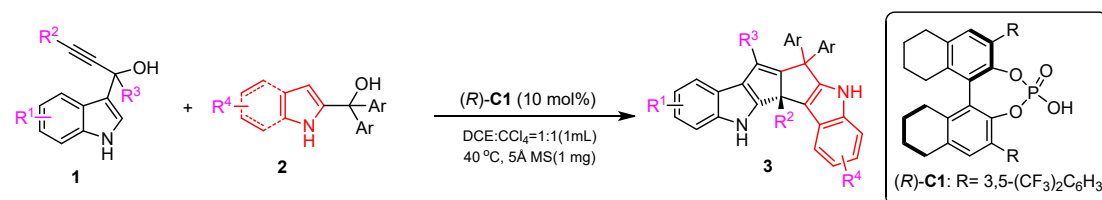

To a solution of  $\alpha$ -indolyl propargylic alcohol **1** (0.10 mmol, 1.0 equiv.), 1 mg 5Å MS and catalyst **(R)-C1** (0.01 mmol, 10 mol%) in DCE:CCl<sub>4</sub> (1 mL, v/v=1:1) was added 2-indolylmethanol **2** (0.01 mmol, 1.0 equiv.). The mixture was stirred at 40 °C until the reaction was completed (monitored by TLC analysis). The crude product was purified directly by flash column chromatography on silica gel (petroleum ether/ ethyl acetate =30:1~20:1) to give the desired racemic products **3a, 3c, 3e, 3i-3o, 3q-3w, 5, 7, 9**.

### Conditions B:

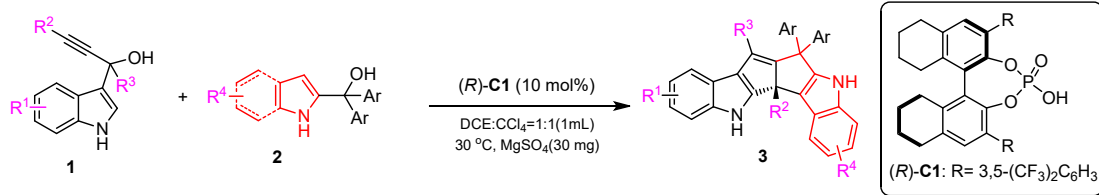

To a solution of  $\alpha$ -indolyl propargylic alcohol **1** (0.10 mmol, 1.0 equiv.), 30 mg MgSO<sub>4</sub> and catalyst  $(R)\text{-C1}$  (0.01 mmol, 10 mol%) in DCE:CCl<sub>4</sub> (1 mL, v/v=1:1) was added 2-indolylmethanols **2** (0.01 mmol, 1.0 equiv.). The mixture was stirred at 30 °C until the reaction was completed (monitored by TLC analysis). The crude product was purified directly by flash column chromatography on silica gel (petroleum ether/ ethyl acetate =30:1~20:1) to give the desired racemic products **3b**, **3d**, **3f-3h**, **3p**.

### c. Analytical Data for Products **3a-3w**, **5**, **7**, **9**

$(R)$ -5b,11,11-triphenyl-12-(trifluoromethyl)-5,5b,10,11-tetrahydropentaleno[1,2-b:5,6-b']diindole (**3a**)

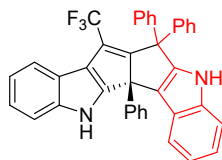

White foam, 48 h, 83% yield, 96:4 *er*,  $[\alpha]_D^{20} = +49.60$  (c = 0.25, MeOH). **<sup>1</sup>H NMR** (500 MHz, CDCl<sub>3</sub>)  $\delta$  8.38 (s, 1H), 7.97 (s, 1H), 7.74 (dd, J = 33.9, 7.1 Hz, 2H), 7.35 (dd, J = 19.6, 7.5 Hz, 2H), 7.27–7.13 (m, 9H), 7.06–6.93 (m, 4H), 6.84 (t, J = 7.2 Hz, 1H), 6.80–6.66 (m, 3H), 6.45 (d, J = 7.7 Hz, 2H). **<sup>13</sup>C NMR** (126 MHz, CDCl<sub>3</sub>)  $\delta$  164.4 (q, J = 4.7 Hz), 149.8, 149.2, 143.6, 141.2, 139.9, 139.7, 139.6, 129.7, 129.5, 128.3, 128.0, 128.0, 127.6, 127.3, 126.8, 126.6, 126.4, 124.0, 123.1 (q, J = 36.5 Hz), 122.7 (q, J = 270.5 Hz), 122.5, 122.4, 121.3, 121.2, 121.1, 121.0, 120.2, 119.2, 112.7, 112.4, 110.3, 63.1, 60.2. **<sup>19</sup>F NMR** (471 MHz, CDCl<sub>3</sub>)  $\delta$  -58.70. **HRMS** (ESI): *m/z* calcd. for C<sub>39</sub>H<sub>25</sub>N<sub>2</sub>F<sub>3</sub> [M-H]<sup>-</sup>: 577.1897; found: 577.1904. **HPLC analysis**: The enantiomeric excess was determined by HPLC with Chiralpak IB column (hexane/*i*-PrOH = 95/5, flow rate 1 mL·min<sup>-1</sup>,  $\lambda$  = 254 nm):  $t_{\text{major}}$  = 10.7 min,  $t_{\text{minor}}$  = 13.9 min.

$(R)$ -2-fluoro-5b,11,11-triphenyl-12-(trifluoromethyl)-5,5b,10,11-tetrahydropentaleno[1,2-b:5,6-b']diindole (**3b**)

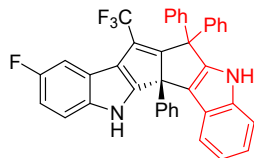

Light yellow foam, 4 d, 84% yield, 97:3 *er*,  $[\alpha]_D^{20} = +68.24$  (c = 0.17, MeOH). **<sup>1</sup>H NMR** (500 MHz, CDCl<sub>3</sub>)  $\delta$  8.40 (s, 1H), 8.00 (s, 1H), 7.68 (d, J = 7.9 Hz, 1H), 7.51–7.32 (m, 2H), 7.32–7.11 (m, 8H), 7.10–6.88 (m, 5H), 6.88–6.83 (m, 1H), 6.75 (t, J = 7.7 Hz, 3H), 6.50–6.39 (m, 2H). **<sup>13</sup>C NMR** (126 MHz, CDCl<sub>3</sub>)  $\delta$  164.4 (q, J = 5.1 Hz), 159.6, 157.8, 150.9, 149.8, 143.4, 139.7, 139.6, 139.5, 137.6, 129.6, 129.5, 128.3, 128.1, 128.0, 127.7, 127.4, 126.9, 126.6, 126.4, 124.8 (q, J = 270.4 Hz), 124.0, 122.7 (q, J = 36.5 Hz), 122.5, 121.5, 121.5, 121.2, 120.9, 119.1, 112.9, 112.8, 112.7, 110.8, 110.6, 110.2, 105.5 (d, J = 1.2 Hz), 105.3 (d, J = 1.3 Hz), 63.2, 60.2. **<sup>19</sup>F NMR** (471 MHz, CDCl<sub>3</sub>)  $\delta$  -58.67 (d, J = 5.6 Hz), -122.48 (d, J = 11.0 Hz). **HRMS** (ESI): *m/z* calcd. for C<sub>39</sub>H<sub>24</sub>N<sub>2</sub>F<sub>4</sub> [M-H]<sup>-</sup>: 595.1803; found: 595.1811. **HPLC analysis**: The enantiomeric excess was determined by HPLC with Chiralpak IA column (hexane/*i*-PrOH = 95/5, flow rate 1 mL·min<sup>-1</sup>,  $\lambda$  = 254 nm):  $t_{\text{major}}$  = 16.2 min,  $t_{\text{minor}}$  = 9.8 min.

(*R*)-2-bromo-5b,11,11-triphenyl-12-(trifluoromethyl)-5,5b,10,11-tetrahydropentaleno[1,2-b:5,6-b']diindole (**3c**)

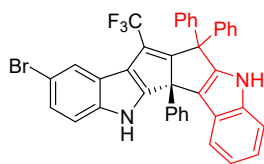

White foam, 72 h, 78% yield, 96:4 *er*,  $[\alpha]_D^{20} = +66.15$  ( $c = 0.13$ , MeOH). **<sup>1</sup>H NMR** (500 MHz, CDCl<sub>3</sub>)  $\delta$  8.47 (s, 1H), 8.03 (s, 1H), 7.88 (s, 1H), 7.76–7.61 (m, 1H), 7.45–7.34 (m, 1H), 7.32–7.09 (m, 9H), 7.06–6.93 (m, 4H), 6.86 (t,  $J = 7.3$  Hz, 1H), 6.75 (t,  $J = 7.8$  Hz, 3H), 6.45 (d,  $J = 7.5$  Hz, 2H). **<sup>13</sup>C NMR** (126 MHz, CDCl<sub>3</sub>)  $\delta$  164.8 (q,  $J = 5.0$  Hz), 150.3, 149.8, 143.3, 139.7, 139.6, 139.5, 139.5, 129.6, 129.5, 128.3, 128.1, 128.0, 127.7, 127.4, 127.0, 126.7, 126.3, 125.3, 123.9, 123.0 (q,  $J = 36.6$  Hz), 122.7, 122.6 (q,  $J = 270.5$  Hz), 122.5, 121.2, 120.4, 120.3, 119.1, 114.5, 113.7, 112.7, 110.0, 63.1, 60.3. **<sup>19</sup>F NMR** (471 MHz, CDCl<sub>3</sub>)  $\delta$  -58.63. **HRMS** (ESI):  $m/z$  calcd. for C<sub>39</sub>H<sub>24</sub>N<sub>2</sub>F<sub>3</sub>Br [M]: 656.1080; found: 656.1041. **HPLC analysis**: The enantiomeric excess was determined by HPLC with Chiralpak IB column (hexane/*i*-PrOH = 95/5, flow rate 1 mL·min<sup>-1</sup>,  $\lambda = 245$  nm):  $t_{\text{major}} = 13.5$  min,  $t_{\text{minor}} = 20.4$  min.

(*R*)-2-chloro-5b,11,11-triphenyl-12-(trifluoromethyl)-5,5b,10,11-tetrahydropentaleno[1,2-b:5,6-b']diindole (**3d**)

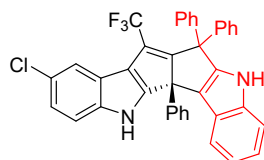

White foam, 42 h, 85% yield, 96.5:3.5 *er*,  $[\alpha]_D^{20} = +70.00$  ( $c = 0.15$ , MeOH). **<sup>1</sup>H NMR** (500 MHz, CDCl<sub>3</sub>)  $\delta$  8.45 (s, 1H), 8.03 (s, 1H), 7.72 (s, 1H), 7.71–7.62 (m, 1H), 7.38 (dd,  $J = 6.1, 2.7$  Hz, 1H), 7.30–7.09 (m, 9H), 7.05–6.93 (m, 4H), 6.85 (t,  $J = 7.3$  Hz, 1H), 6.74 (dd,  $J = 10.6, 4.8$  Hz, 3H), 6.54–6.35 (m, 2H). **<sup>13</sup>C NMR** (126 MHz, CDCl<sub>3</sub>)  $\delta$  164.8 (q,  $J = 5.2$  Hz), 150.5, 149.8, 143.3, 139.6, 139.5, 139.5, 139.4, 129.6, 129.5, 128.3, 128.1, 128.0, 127.7, 127.4, 127.0, 126.9, 126.7, 126.3, 123.9, 123.0 (q,  $J = 36.8$  Hz), 122.8, 122.6 (q,  $J = 270.6$  Hz), 122.5, 122.1, 121.2, 120.5, 120.5, 119.7, 119.8, 119.1, 113.3, 112.7, 110.1, 63.2, 60.3. **<sup>19</sup>F NMR** (376 MHz, CDCl<sub>3</sub>)  $\delta$  -58.61. **HRMS** (ESI):  $m/z$  calcd. for C<sub>39</sub>H<sub>24</sub>N<sub>2</sub>F<sub>3</sub>Cl [M-H]: 611.1507; found: 611.1489. **HPLC analysis**: The enantiomeric excess was determined by HPLC with Chiralpak IB column (hexane/*i*-PrOH = 95/5, flow rate 1 mL·min<sup>-1</sup>,  $\lambda = 254$  nm):  $t_{\text{major}} = 12.3$  min,  $t_{\text{minor}} = 17.0$  min.

(*R*)-2-methyl-5b,11,11-triphenyl-12-(trifluoromethyl)-5,5b,10,11-tetrahydropentaleno[1,2-b:5,6-b']diindole (**3e**)

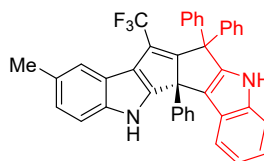

White solid, 66 h, 88% yield, 97:3 *er*,  $[\alpha]_D^{20} = +66.67$  ( $c = 0.24$ , MeOH). **<sup>1</sup>H NMR** (400 MHz, CDCl<sub>3</sub>)  $\delta$  8.34 (d,  $J = 7.4$  Hz, 1H), 8.02 (s, 1H), 7.70 (dd,  $J = 6.4, 2.0$  Hz, 1H), 7.55 (s, 1H), 7.41 (d,  $J = 6.9$  Hz, 1H), 7.21 (ddd,  $J = 16.3, 8.3, 3.1$  Hz, 8H), 7.08–6.95 (m, 5H), 6.85 (t,  $J = 7.3$  Hz, 1H), 6.75 (dd,  $J = 12.7, 4.9$  Hz, 3H), 6.46 (d,  $J = 7.4$  Hz, 2H), 2.47 (s, 3H). **<sup>13</sup>C NMR** (126 MHz, CDCl<sub>3</sub>)  $\delta$  164.1 (q,  $J = 5.4$  Hz), 149.8, 149.4, 143.7, 140.1, 139.8, 139.6, 139.5, 130.6, 129.8, 129.5, 128.3, 128.0, 128.0, 127.6, 127.3, 126.8, 126.6, 126.4, 124.1, 124.0, 123.2 (q,  $J = 36.3$  Hz), 122.8 (q,  $J = 270.2$  Hz), 122.4, 121.4, 121.1, 120.5, 120.5, 119.8, 119.2, 112.6, 112.0, 110.4, 63.0, 60.2, 21.7. **<sup>19</sup>F NMR** (376 MHz, CDCl<sub>3</sub>)  $\delta$  -58.72. **HRMS** (ESI):  $m/z$  calcd. for C<sub>40</sub>H<sub>27</sub>N<sub>2</sub>F<sub>3</sub> [M-H]: 591.2054; found: 591.2054. **HPLC analysis**: The enantiomeric excess was determined by HPLC with Chiralpak IB column (hexane/*i*-PrOH = 95/5, flow rate 1 mL·min<sup>-1</sup>,  $\lambda = 245$  nm):  $t_{\text{major}} = 9.7$  min,  $t_{\text{minor}} = 24.5$  min.



(*R*)-2-methoxy-5b,11,11-triphenyl-12-(trifluoromethyl)-5,5b,10,11-tetrahydropentaleno[1,2-b:5,6-b']diindole (**3f**)

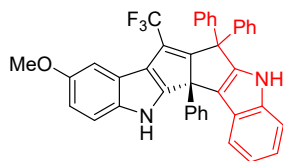

White foam, 18 h, 40% yield, 96:4 *er*,  $[a]_D^{20} = +44.00$  ( $c = 0.10$ , MeOH). **<sup>1</sup>H NMR** (500 MHz, CDCl<sub>3</sub>)  $\delta$  8.35 (s, 1H), 8.05 (s, 1H), 7.69 (d,  $J = 7.2$  Hz, 1H), 7.40 (d,  $J = 7.3$  Hz, 1H), 7.22 (dt,  $J = 19.6, 8.3$  Hz, 9H), 7.04 (d,  $J = 7.9$  Hz, 2H), 6.98 (s, 2H), 6.87–6.81 (m, 2H), 6.75 (t,  $J = 7.7$  Hz, 3H), 6.44 (t,  $J = 20.2$  Hz, 2H), 3.85 (s, 3H). **<sup>13</sup>C NMR** (126 MHz, CDCl<sub>3</sub>)  $\delta$  164.0 (q,  $J = 4.8$  Hz), 155.1, 150.0, 149.8, 143.6, 140.0, 139.7, 139.6, 136.2, 129.7, 129.5, 128.3, 128.0, 128.0, 127.6, 127.3, 126.8, 126.6, 126.4, 124.9 (q,  $J = 270.5$  Hz), 124.0, 123.1 (q,  $J = 36.6$  Hz), 122.4, 121.7, 121.1, 120.8, 120.7, 119.2, 113.0, 112.6, 112.3, 110.5, 102.3, 63.0, 60.2, 56.0. **<sup>19</sup>F NMR** (471 MHz, CDCl<sub>3</sub>)  $\delta$  -58.62. **HRMS** (ESI):  $m/z$  calcd. for C<sub>40</sub>H<sub>27</sub>N<sub>2</sub>OF<sub>3</sub> [M-H]<sup>-</sup>: 607.2003; found: 607.2009. **HPLC analysis**: The enantiomeric excess was determined by HPLC with Chiralpak AD-H column (hexane/*i*-PrOH = 95/5, flow rate 1 mL·min<sup>-1</sup>,  $\lambda = 254$  nm):  $t_{\text{major}} = 9.8$  min,  $t_{\text{minor}} = 7.7$  min.

(*R*)-3-fluoro-5b,11,11-triphenyl-12-(trifluoromethyl)-5,5b,10,11-tetrahydropentaleno[1,2-b:5,6-b']diindole (**3g**)

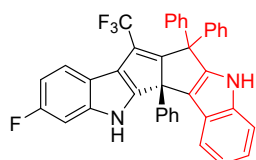

White foam, 4 d, 75% yield, 96:4 *er*,  $[a]_D^{20} = +61.43$  ( $c = 0.14$ , MeOH). **<sup>1</sup>H NMR** (500 MHz, CDCl<sub>3</sub>)  $\delta$  8.42 (s, 1H), 8.02 (s, 1H), 7.80–7.62 (m, 2H), 7.39 (dd,  $J = 6.3, 2.4$  Hz, 1H), 7.31–7.10 (m, 7H), 7.04 (dt,  $J = 11.0, 5.6$  Hz, 3H), 6.99–6.92 (m, 3H), 6.85 (t,  $J = 7.3$  Hz, 1H), 6.75 (dd,  $J = 9.6, 6.0$  Hz, 3H), 6.44 (d,  $J = 7.4$  Hz, 2H). **<sup>13</sup>C NMR** (126 MHz, CDCl<sub>3</sub>)  $\delta$  164.8 (q,  $J = 5.2$  Hz), 160.9, 159.0, 149.7, 149.3 (d,  $J = 3.2$  Hz), 143.5, 141.2, 141.1, 139.7, 139.6, 129.7, 129.5, 128.3, 128.1, 128.0, 127.7, 127.4, 126.9, 126.6, 126.4, 124.0, 122.8 (q,  $J = 36.4$  Hz), 122.7 (q,  $J = 270.6$  Hz), 122.5, 121.2, 121.0, 121.0, 120.9, 119.1, 117.9, 112.7, 110.2, 109.9, 109.7, 99.0, 98.8, 63.3, 60.2. **<sup>19</sup>F NMR** (471 MHz, CDCl<sub>3</sub>)  $\delta$  -58.68, -119.83. **HRMS** (ESI):  $m/z$  calcd. for C<sub>39</sub>H<sub>24</sub>N<sub>2</sub>F<sub>4</sub> [M-H]<sup>-</sup>: 595.1803; found: 595.1807. **HPLC analysis**: The enantiomeric excess was determined by HPLC with Chiralpak AD-H column (hexane/*i*-PrOH = 95/5, flow rate 1 mL·min<sup>-1</sup>,  $\lambda = 254$  nm):  $t_{\text{major}} = 7.7$  min,  $t_{\text{minor}} = 6.2$  min.

(*R*)-3-chloro-5b,11,11-triphenyl-12-(trifluoromethyl)-5,5b,10,11-tetrahydropentaleno[1,2-b:5,6-b']diindole (**3h**)

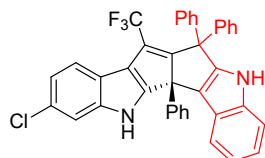

White foam, 3 d, 78% yield, 96.5:3.5 *er*,  $[a]_D^{20} = +60.77$  ( $c = 0.26$ , MeOH). **<sup>1</sup>H NMR** (400 MHz, CDCl<sub>3</sub>)  $\delta$  8.46 (s, 1H), 8.05 (s, 1H), 7.66 (t,  $J = 8.4$  Hz, 2H), 7.45–7.31 (m, 2H), 7.29–7.10 (m, 8H), 7.06–6.93 (m, 4H), 6.85 (t,  $J = 7.3$  Hz, 1H), 6.75 (t,  $J = 7.7$  Hz, 3H), 6.43 (d,  $J = 7.5$  Hz, 2H). **<sup>13</sup>C NMR** (126 MHz, CDCl<sub>3</sub>)  $\delta$  164.9 (q,  $J = 5.2$  Hz), 149.8, 149.7, 143.4, 141.4, 139.6, 139.5, 129.7, 129.5, 128.3, 128.2, 128.1, 128.0, 127.7, 127.4, 126.9, 126.6, 126.3, 123.9, 122.7 (q,  $J = 36.2$  Hz), 122.6 (q,  $J = 270.6$  Hz), 122.5, 121.9, 121.2, 121.0, 119.8, 119.1, 112.7, 112.3, 110.1, 63.2, 60.3. **<sup>19</sup>F NMR** (376 MHz, CDCl<sub>3</sub>)  $\delta$  -58.66. **HRMS** (ESI):  $m/z$  calcd. for C<sub>39</sub>H<sub>24</sub>N<sub>2</sub>F<sub>3</sub>Cl [M-H]<sup>-</sup>: 611.1507; found: 611.1491. **HPLC analysis**: The enantiomeric excess was determined by HPLC with Chiralpak AD-H column (hexane/*i*-PrOH = 95/5, flow rate 1 mL·min<sup>-1</sup>,  $\lambda = 254$  nm):  $t_{\text{major}} = 6.9$  min,  $t_{\text{minor}} = 6.0$  min.

min.

(*R*)-5b-(4-fluorophenyl)-11,11-diphenyl-12-(trifluoromethyl)-5,5b,10,11-tetrahydropentaleno[1,2-b:5,6-b']diindole (**3i**)

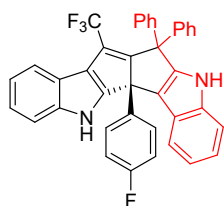

White foam, 88 h, 98% yield, 96:4 *er*,  $[a]_D^{20} = +61.43$  ( $c = 0.21$ , MeOH). **<sup>1</sup>H NMR** (500 MHz, CDCl<sub>3</sub>)  $\delta$  8.42 (s, 1H), 8.05 (s, 1H), 7.80–7.74 (m, 1H), 7.67 (dd,  $J = 7.7, 5.9$  Hz, 1H), 7.47–7.35 (m, 2H), 7.30–7.11 (m, 9H), 7.03 (dd,  $J = 12.6, 7.6$  Hz, 4H), 6.77 (d,  $J = 7.1$  Hz, 1H), 6.55–6.21 (m, 4H). **<sup>13</sup>C NMR** (126 MHz, CDCl<sub>3</sub>)  $\delta$  164.3 (q,  $J = 5.3$  Hz), 162.7, 160.7, 149.9, 148.8, 143.4, 141.2, 139.7, 139.6, 135.6, 135.6, 129.7, 129.5, 128.3, 128.2, 128.1, 128.1, 127.7, 127.4, 126.8, 123.8, 123.0 (q,  $J = 36.6$  Hz), 122.7 (q,  $J = 271.0$  Hz), 122.6, 122.5, 121.3, 121.2, 121.2, 120.9, 120.2, 119.1, 114.8, 114.6, 112.7, 112.4, 110.1, 62.4, 60.2. **<sup>19</sup>F NMR** (471 MHz, CDCl<sub>3</sub>)  $\delta$  -58.73, -116.04. **HRMS** (ESI): *m/z* calcd. for C<sub>39</sub>H<sub>24</sub>N<sub>2</sub>F<sub>4</sub> [M-H]<sup>-</sup>: 595.1803; found: 595.1799. **HPLC analysis**: The enantiomeric excess was determined by HPLC with Chiralpak IB column (hexane/*i*-PrOH = 95/5, flow rate 1 mL·min<sup>-1</sup>,  $\lambda = 245$  nm):  $t_{\text{major}} = 11.5$  min,  $t_{\text{minor}} = 16.2$  min.

(*R*)-5b-(4-chlorophenyl)-11,11-diphenyl-12-(trifluoromethyl)-5,5b,10,11-tetrahydropentaleno[1,2-b:5,6-b']diindole (**3j**)

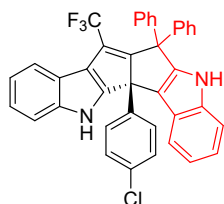

White foam, 24 h, 70% yield, 97:3 *er*,  $[a]_D^{20} = +44.35$  ( $c = 0.23$ , MeOH). **<sup>1</sup>H NMR** (400 MHz, CDCl<sub>3</sub>)  $\delta$  8.38 (s, 1H), 8.01 (s, 1H), 7.86–7.71 (m, 1H), 7.69–7.59 (m, 1H), 7.46–7.32 (m, 2H), 7.27–7.07 (m, 9H), 7.02 (d,  $J = 7.4$  Hz, 4H), 6.78 (d,  $J = 7.3$  Hz, 1H), 6.68 (d,  $J = 8.6$  Hz, 2H), 6.35 (d,  $J = 8.6$  Hz, 2H). **<sup>13</sup>C NMR** (126 MHz, CDCl<sub>3</sub>)  $\delta$  164.2 (q,  $J = 4.9$  Hz), 149.9, 148.6, 143.3, 141.2, 139.6, 139.6, 138.6, 132.5, 129.6, 129.5, 128.3, 128.1, 128.0, 127.9, 127.7, 127.4, 126.8, 123.8, 123.2 (q,  $J = 36.6$  Hz), 122.7, 122.7 (q,  $J = 270.7$  Hz), 122.6, 121.3, 121.2, 121.2, 121.1, 120.2, 119.0, 112.7, 112.4, 109.8, 62.5, 60.2. **<sup>19</sup>F NMR** (471 MHz, CDCl<sub>3</sub>)  $\delta$  -58.73. **HRMS** (ESI): *m/z* calcd. for C<sub>39</sub>H<sub>24</sub>N<sub>2</sub>F<sub>3</sub>Cl [M-H]<sup>-</sup>: 611.1507; found: 611.1489. **HPLC analysis**: The enantiomeric excess was determined by HPLC with Chiralpak IB column (hexane/*i*-PrOH = 95/5, flow rate 1 mL·min<sup>-1</sup>,  $\lambda = 245$  nm):  $t_{\text{major}} = 11.9$  min,  $t_{\text{minor}} = 16.1$  min.

(*R*)-11,11-diphenyl-5b-(*p*-tolyl)-12-(trifluoromethyl)-5,5b,10,11-tetrahydropentaleno[1,2-b:5,6-b']diindole (**3k**)

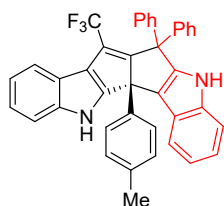

White foam, 88 h, 91% yield, 97:3 *er*,  $[a]_D^{20} = +57.39$  ( $c = 0.23$ , MeOH). **<sup>1</sup>H NMR** (500 MHz, CDCl<sub>3</sub>)  $\delta$  8.46 (s, 1H), 8.01 (s, 1H), 7.84 (t,  $J = 6.1$  Hz, 1H), 7.78–7.70 (m, 1H), 7.42 (ddd,  $J = 9.1, 5.5, 3.2$  Hz, 2H), 7.31–7.17 (m,

9H), 7.12–7.01 (m, 4H), 6.84 (d,  $J = 7.2$  Hz, 1H), 6.60 (d,  $J = 8.1$  Hz, 2H), 6.39 (d,  $J = 8.2$  Hz, 2H), 2.11 (s, 3H).  $^{13}\text{C}$  NMR (126 MHz,  $\text{CDCl}_3$ )  $\delta$  164.5 (q,  $J = 5.1$  Hz), 149.7, 149.3, 143.7, 141.2, 139.8, 139.6, 136.8, 136.4, 132.6, 130.2, 129.7, 129.5, 128.6, 128.4, 128.3, 127.9, 127.6, 127.3, 126.4, 126.3, 124.0, 123.1 (q,  $J = 36.3$  Hz), 122.8 (q,  $J = 270.3$  Hz), 122.4, 122.4, 121.3, 121.1, 121.1, 120.9 (d,  $J = 1.7$  Hz), 120.1, 119.2, 112.6, 112.3, 110.5, 62.9, 60.2, 20.9.  $^{19}\text{F}$  NMR (376 MHz,  $\text{CDCl}_3$ )  $\delta$  -58.71. **HRMS** (ESI):  $m/z$  calcd. for  $\text{C}_{40}\text{H}_{27}\text{N}_2\text{F}_3$  [M-H] $^-$ : 591.2054; found: 591.2043. **HPLC analysis**: The enantiomeric excess was determined by HPLC with Chiralpak IB column (hexane/*i*-PrOH = 95/5, flow rate 1 mL·min $^{-1}$ ,  $\lambda = 254$  nm):  $t_{\text{major}} = 10.1$  min,  $t_{\text{minor}} = 13.1$  min.

(*R*)-5b-(4-methoxyphenyl)-11,11-diphenyl-12-(trifluoromethyl)-5,5b,10,11-tetrahydropentaleno[1,2-b:5,6-b']diindole (**3l**)

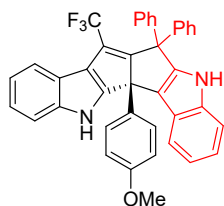

White foam, 24 h, 99% yield, 98:2 *er*,  $[\alpha]_D^{20} = +48.75$  ( $c = 0.24$ , MeOH).  $^1\text{H}$  NMR (400 MHz,  $\text{CDCl}_3$ )  $\delta$  8.36 (s, 1H), 7.99 (s, 1H), 7.83–7.72 (m, 1H), 7.63 (d,  $J = 7.2$  Hz, 1H), 7.37 (t,  $J = 7.1$  Hz, 1H), 7.31 (dt,  $J = 6.5, 2.9$  Hz, 1H), 7.26–7.10 (m, 9H), 7.00 (d,  $J = 6.6$  Hz, 4H), 6.76 (d,  $J = 7.2$  Hz, 1H), 6.52–6.10 (m, 4H), 3.52 (s, 3H).  $^{13}\text{C}$  NMR (126 MHz,  $\text{CDCl}_3$ )  $\delta$  164.5 (q,  $J = 5.4$  Hz), 158.4, 149.8, 149.2, 143.7, 141.1, 139.8, 139.6, 131.9, 129.7, 129.5, 128.3, 128.0, 127.7, 127.6, 127.3, 126.6, 123.9, 122.9 (q,  $J = 36.9$  Hz), 122.8 (q,  $J = 270.6$  Hz), 122.4, 122.4, 121.3, 121.1, 121.1, 120.8, 120.1, 119.2, 113.4, 112.6, 112.3, 110.6, 62.5, 60.2, 55.3.  $^{19}\text{F}$  NMR (471 MHz,  $\text{CDCl}_3$ )  $\delta$  -58.72. **HRMS** (ESI):  $m/z$  calcd. for  $\text{C}_{40}\text{H}_{27}\text{N}_2\text{OF}_3$  [M-H] $^-$ : 607.2003; found: 607.2003. **HPLC analysis**: The enantiomeric excess was determined by HPLC with Chiralpak IB column (hexane/*i*-PrOH = 95/5, flow rate 1 mL·min $^{-1}$ ,  $\lambda = 254$  nm):  $t_{\text{major}} = 15.4$  min,  $t_{\text{minor}} = 20.0$  min.

(*R*)-5b-(3-chlorophenyl)-11,11-diphenyl-12-(trifluoromethyl)-5,5b,10,11-tetrahydropentaleno[1,2-b:5,6-b']diindole (**3m**)

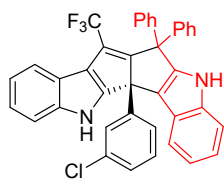

White foam, 48 h, 92% yield, 96:4 *er*,  $[\alpha]_D^{20} = +85.45$  ( $c = 0.11$ , MeOH).  $^1\text{H}$  NMR (500 MHz,  $\text{CDCl}_3$ )  $\delta$  8.44 (s, 1H), 7.94 (s, 1H), 7.76 (d,  $J = 7.1$  Hz, 1H), 7.73–7.61 (m, 1H), 7.40 (dd,  $J = 6.8, 1.6$  Hz, 1H), 7.35 (dt,  $J = 6.7, 2.7$  Hz, 1H), 7.30–7.09 (m, 7H), 7.04 (d,  $J = 15.0$  Hz, 3H), 6.97–6.86 (m, 3H), 6.77 (t,  $J = 7.8$  Hz, 2H), 6.70–6.63 (m, 1H), 6.42 (dd,  $J = 12.2, 4.9$  Hz, 2H).  $^{13}\text{C}$  NMR (126 MHz,  $\text{CDCl}_3$ )  $\delta$  163.8 (q,  $J = 5.2$  Hz), 149.9, 148.3, 143.2, 142.2, 141.1, 139.6, 139.5, 133.9, 129.6, 129.5, 129.3, 128.3, 128.1, 127.7, 127.4, 127.1, 126.9, 126.7, 124.5, 123.7, 123.1 (q,  $J = 36.7$  Hz), 122.7, 122.6 (q,  $J = 269.9$  Hz), 122.6, 121.3, 121.3, 121.2, 121.0 (d,  $J = 1.6$  Hz), 120.2, 119.0, 112.7, 112.4, 109.7, 62.6, 60.2.  $^{19}\text{F}$  NMR (471 MHz,  $\text{CDCl}_3$ )  $\delta$  -58.68. **HRMS** (ESI):  $m/z$  calcd. for  $\text{C}_{39}\text{H}_{24}\text{N}_2\text{F}_3\text{Cl}$  [M-H] $^-$ : 611.1507; found: 611.1503. **HPLC analysis**: The enantiomeric excess was determined by HPLC with Chiralpak IB column (hexane/*i*-PrOH = 95/5, flow rate 1 mL·min $^{-1}$ ,  $\lambda = 254$  nm):  $t_{\text{major}} = 12.2$  min,  $t_{\text{minor}} = 15.0$  min.

(*R*)-11,11-bis(4-fluorophenyl)-5b-phenyl-12-(trifluoromethyl)-5,5b,10,11-tetrahydropentaleno[1,2-b:5,6-

b']diindole (**3n**)

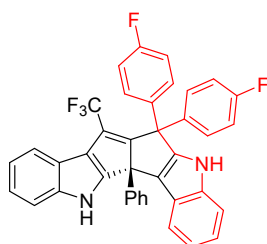

White foam, 88 h, 95% yield, 97:3 *er*,  $[a]_D^{20} = +122.00$  (*c* = 0.10, MeOH). **<sup>1</sup>H NMR** (500 MHz, CDCl<sub>3</sub>) δ 8.41 (s, 1H), 7.95 (s, 1H), 7.76 (d, *J* = 7.4 Hz, 1H), 7.68 (d, *J* = 7.4 Hz, 1H), 7.43–7.30 (m, 2H), 7.29–7.15 (m, 4H), 7.12 (d, *J* = 16.4 Hz, 2H), 6.97 (dd, *J* = 9.3, 5.5 Hz, 1H), 6.94 – 6.84 (m, 3H), 6.80–6.56 (m, 5H), 6.42 (d, *J* = 7.7 Hz, 2H). **<sup>13</sup>C NMR** (126 MHz, CDCl<sub>3</sub>) δ 163.9 (q, *J* = 5.2 Hz), 163.1, 162.4, 161.1, 160.5, 149.1, 141.1, 139.6, 139.6, 139.1, 135.6 (d, *J* = 3.0 Hz), 131.3 (d, *J* = 8.1 Hz), 131.0 (d, *J* = 8.0 Hz), 128.1, 127.0, 126.4, 123.9, 123.2 (q, *J* = 36.7 Hz), 122.7, 122.7 (q, *J* = 270.6 Hz), 122.6, 121.3, 121.3, 121.2, 120.8, 120.2, 119.3, 115.7, 115.5, 115.0, 114.8, 114.3, 114.1, 112.7, 112.4, 110.5, 62.9, 59.0. **<sup>19</sup>F NMR** (376 MHz, CDCl<sub>3</sub>) δ -58.52, -115.14, -115.83. **HRMS** (ESI): *m/z* calcd. for C<sub>39</sub>H<sub>23</sub>N<sub>2</sub>F<sub>5</sub> [M-H]<sup>-</sup>: 613.1709; found: 613.1702. **HPLC analysis**: The enantiomeric excess was determined by HPLC with Chiralpak IA column (hexane/*i*-PrOH = 95/5, flow rate 1 mL·min<sup>-1</sup>, λ = 254 nm): *t*<sub>major</sub> = 14.5 min, *t*<sub>minor</sub> = 9.4 min.

(*R*)-11,11-bis(4-chlorophenyl)-5b-phenyl-12-(trifluoromethyl)-5,5b,10,11-tetrahydropentaleno[1,2-b:5,6-b']diindole (**3o**)

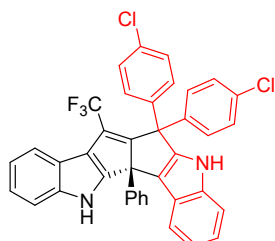

White foam, 4 d, 83% yield, 96.5:3.5 *er*,  $[a]_D^{20} = +72.86$  (*c* = 0.28, MeOH). **<sup>1</sup>H NMR** (500 MHz, CDCl<sub>3</sub>) δ 8.44 (s, 1H), 7.94 (s, 1H), 7.76 (d, *J* = 7.1 Hz, 1H), 7.73–7.65 (m, 1H), 7.46–7.37 (m, 1H), 7.35 (dt, *J* = 6.7, 2.7 Hz, 1H), 7.29–7.12 (m, 7H), 7.12–7.02 (m, 2H), 6.98–6.88 (m, 3H), 6.76 (dd, *J* = 16.5, 8.9 Hz, 2H), 6.71–6.64 (m, 1H), 6.50–6.26 (m, 2H). **<sup>13</sup>C NMR** (126 MHz, CDCl<sub>3</sub>) δ 163.2 (q, *J* = 5.2 Hz), 149.1, 148.7, 141.6, 141.2, 139.6, 139.4, 138.1, 133.5, 132.7, 131.0, 130.6, 128.7, 128.2, 127.8, 127.1, 126.3, 123.9, 123.5 (q, *J* = 36.7 Hz), 122.8, 122.7, 122.6 (q, *J* = 270.7 Hz), 121.4, 121.4, 121.2, 120.8, 120.8, 120.2, 119.3, 112.7, 112.4, 110.7, 62.9, 59.1. **<sup>19</sup>F NMR** (471 MHz, CDCl<sub>3</sub>) δ -58.46. **HRMS** (ESI): *m/z* calcd. for C<sub>39</sub>H<sub>23</sub>N<sub>2</sub>F<sub>3</sub>Cl<sub>2</sub> [M-H]<sup>-</sup>: 645.1118; found: 645.1117. **HPLC analysis**: The enantiomeric excess was determined by HPLC with Chiralpak IB column (hexane/*i*-PrOH = 95/5, flow rate 1 mL·min<sup>-1</sup>, λ = 254 nm): *t*<sub>major</sub> = 13.8 min, *t*<sub>minor</sub> = 12.5 min.

(*R*)-5b-phenyl-11,11-di-*p*-tolyl-12-(trifluoromethyl)-5,5b,10,11-tetrahydropentaleno[1,2-b:5,6-b']diindole (**3p**)

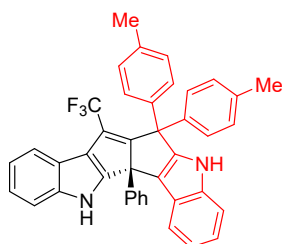

White foam, 48 h, 40% yield, 96:4 *er*,  $[a]_D^{20} = +95.00$  (*c* = 0.08, MeOH). **<sup>1</sup>H NMR** (500 MHz, CDCl<sub>3</sub>) δ: 8.35 (s,

1H), 7.91 (s, 1H), 7.77 (d, J = 7.4 Hz, 1H), 7.72 - 7.63 (m, 1H), 7.32 (d, J = 7.9 Hz, 2H), 7.25 - 7.10 (m, 4H), 6.97 (dd, J = 15.9, 7.9 Hz, 4H), 6.84 (dd, J = 11.3, 4.4 Hz, 2H), 6.79 - 6.59 (m, 5H), 6.45 (d, J = 8.2 Hz, 2H), 2.29 (s, 3H), 2.14 (s, 3H). **<sup>13</sup>C NMR** (126 MHz, CDCl<sub>3</sub>) δ 164.8 (q, J = 5.2 Hz), 150.2, 149.2, 141.1, 140.8, 140.0, 139.5, 136.8, 136.8, 135.9, 129.6, 129.4, 129.0, 128.5, 128.1, 128.0, 126.6, 126.5, 124.1, 122.9 (q, J = 36.3 Hz), 122.8 (q, J = 270.5 Hz), 122.4, 122.3, 121.3, 121.1, 121.0, 120.2, 119.1, 112.6, 112.3, 110.1, 63.1, 59.6, 21.1, 21.0. **<sup>19</sup>F NMR** (376 MHz, CDCl<sub>3</sub>) δ -58.53. **HRMS** (ESI): *m/z* calcd. for C<sub>41</sub>H<sub>29</sub>N<sub>2</sub>F<sub>3</sub> [M-H]<sup>-</sup>: 605.2210; found: 605.2195. **HPLC analysis:** The enantiomeric excess was determined by HPLC with Chiralpak IA column (hexane/*i*-PrOH = 95/5, flow rate 1 mL·min<sup>-1</sup>, λ = 245 nm): *t*<sub>major</sub> = 8.5 min, *t*<sub>minor</sub> = 6.9 min.

(*R*)-7-fluoro-5b,11,11-triphenyl-12-(trifluoromethyl)-5,5b,10,11-tetrahydropentaleno[1,2-b:5,6-b']diindole (**3q**)

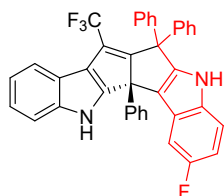

White foam, 4 d, 85% yield, 93:7 *er*, [*a*]<sub>D</sub><sup>20</sup> = +55.65 (c = 0.23, MeOH). **<sup>1</sup>H NMR** (500 MHz, CDCl<sub>3</sub>) δ 8.43 (s, 1H), 8.03 (s, 1H), 7.81–7.73 (m, 1H), 7.42–7.32 (m, 2H), 7.29 (dd, J = 8.8, 4.3 Hz, 1H), 7.26–7.09 (m, 8H), 6.98 (ddd, J = 12.6, 11.5, 5.2 Hz, 4H), 6.85 (t, J = 7.3 Hz, 1H), 6.75 (t, J = 7.6 Hz, 3H), 6.42 (d, J = 7.7 Hz, 2H). **<sup>13</sup>C NMR** (126 MHz, CDCl<sub>3</sub>) δ 164.0 (q, J = 4.9 Hz), 159.6, 157.7, 151.7, 149.0, 143.4, 141.2, 139.6, 139.4, 136.0, 129.6, 129.5, 128.3, 128.1, 128.0, 127.7, 127.4, 126.9, 126.7, 126.3, 124.3, 124.3, 123.4 (q, J = 36.4 Hz), 122.7 (q, J = 270.5 Hz), 122.6, 121.3, 121.2, 121.0 (d, J = 1.6 Hz), 120.2, 113.3, 113.3, 112.4, 110.7, 110.6 (d, J = 4.4 Hz), 110.5, 104.4, 104.2, 62.9, 60.3. **<sup>19</sup>F NMR** (376 MHz, CDCl<sub>3</sub>) δ -58.74, -122.44. **HRMS** (ESI): *m/z* calcd. for C<sub>39</sub>H<sub>24</sub>N<sub>2</sub>F<sub>4</sub> [M-H]<sup>-</sup>: 595.1803; found: 595.1796. **HPLC analysis:** The enantiomeric excess was determined by HPLC with Chiralpak IA column (hexane/*i*-PrOH = 95/5, flow rate 1 mL·min<sup>-1</sup>, λ = 280 nm): *t*<sub>major</sub> = 12.1 min, *t*<sub>minor</sub> = 8.1 min.

(*R*)-7-chloro-5b,11,11-triphenyl-12-(trifluoromethyl)-5,5b,10,11-tetrahydropentaleno[1,2-b:5,6-b']diindole (**3r**)

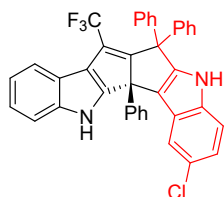

White foam, 4 d, 71% yield, 89:11 *er*, [*a*]<sub>D</sub><sup>20</sup> = +22.50 (c = 0.20, MeOH). **<sup>1</sup>H NMR** (400 MHz, CDCl<sub>3</sub>) δ 8.36 (s, 1H), 8.02 (s, 1H), 7.77 (dd, J = 5.6, 3.0 Hz, 1H), 7.67 (d, J = 1.8 Hz, 1H), 7.41–7.29 (m, 1H), 7.30–7.08 (m, 10H), 7.03–6.94 (m, 3H), 6.85 (t, J = 7.3 Hz, 1H), 6.75 (dt, J = 13.8, 4.4 Hz, 3H), 6.43–6.36 (m, 2H). **<sup>13</sup>C NMR** (126 MHz, CDCl<sub>3</sub>) δ 163.9 (q, J = 5.1 Hz), 151.3, 148.9, 143.4, 141.2, 139.5, 139.3, 137.8, 129.6, 129.5, 128.4, 128.1, 128.1, 127.7, 127.4, 126.9, 126.8, 126.7, 126.3, 125.0, 123.5 (q, J = 36.8 Hz), 122.7, 122.7 (q, J = 270.4 Hz), 122.6, 121.3, 121.2, 121.0 (d, J = 1.5 Hz), 120.2, 118.6, 113.6, 112.5, 110.2, 62.9, 60.3. **<sup>19</sup>F NMR** (376 MHz, CDCl<sub>3</sub>) δ -58.73. **HRMS** (ESI): *m/z* calcd. for C<sub>39</sub>H<sub>24</sub>N<sub>2</sub>F<sub>3</sub>Cl [M-H]<sup>-</sup>: 611.1507; found: 611.1496. **HPLC analysis:** The enantiomeric excess was determined by HPLC with Chiralpak IA column (hexane/*i*-PrOH = 95/5, flow rate 1 mL·min<sup>-1</sup>, λ = 254 nm): *t*<sub>major</sub> = 11.6 min, *t*<sub>minor</sub> = 7.5 min.

(*R*)-7-bromo-5b,11,11-triphenyl-12-(trifluoromethyl)-5,5b,10,11-tetrahydropentaleno[1,2-b:5,6-b']diindole (**3s**)

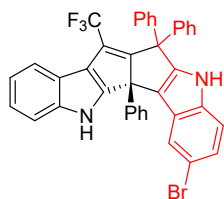

White foam, 4 d, 83% yield, 88:12 *er*,  $[a]_D^{20} = +7.50$  ( $c = 0.24$  MeOH). **<sup>1</sup>H NMR** (400 MHz, CDCl<sub>3</sub>)  $\delta$  8.33 (s, 1H), 7.98 (s, 1H), 7.83 (d,  $J = 1.2$  Hz, 1H), 7.77 (dd,  $J = 5.5, 3.0$  Hz, 1H), 7.35 (dd,  $J = 6.1, 3.1$  Hz, 1H), 7.30 (dd,  $J = 8.7, 1.7$  Hz, 1H), 7.28–7.09 (m, 9H), 6.98 (d,  $J = 7.0$  Hz, 3H), 6.85 (t,  $J = 7.3$  Hz, 1H), 6.74 (dd,  $J = 13.8, 6.1$  Hz, 3H), 6.38 (d,  $J = 7.5$  Hz, 2H). **<sup>13</sup>C NMR** (126 MHz, CDCl<sub>3</sub>)  $\delta$  163.9 (q,  $J = 5.1$  Hz), 151.1, 148.8, 143.4, 141.2, 139.5, 139.3, 138.1, 129.6, 128.4, 128.1, 128.1, 127.7, 127.4, 126.9, 126.7, 126.3, 125.6, 125.3, 123.5 (q,  $J = 36.6$  Hz), 122.7, 122.6 (q,  $J = 270.3$  Hz), 121.7, 121.3, 121.2, 121.1 (d,  $J = 1.4$  Hz), 120.2, 114.3, 114.1, 112.5, 110.1, 62.9, 60.3. **<sup>19</sup>F NMR** (376 MHz, CDCl<sub>3</sub>)  $\delta$  -58.74. **HRMS** (ESI):  $m/z$  calcd. for C<sub>39</sub>H<sub>24</sub>N<sub>2</sub>F<sub>3</sub>Br [M-H]<sup>-</sup>: 655.1002; found: 655.0988. **HPLC analysis**: The enantiomeric excess was determined by HPLC with Chiralpak IA column (hexane/*i*-PrOH = 95/5, flow rate 1 mL·min<sup>-1</sup>,  $\lambda = 254$  nm):  $t_{\text{major}} = 10.9$  min,  $t_{\text{minor}} = 7.4$  min.

(*R*)-7-methyl-5b,11,11-triphenyl-12-(trifluoromethyl)-5,5b,10,11-tetrahydropentaleno[1,2-b:5,6-b']diindole (**3t**)

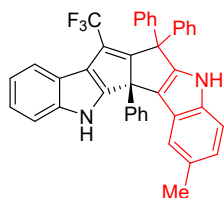

White foam, 3 d, 73% yield, 90:10 *er*,  $[a]_D^{20} = +41.00$  ( $c = 0.20$ , MeOH). **<sup>1</sup>H NMR** (500 MHz, CDCl<sub>3</sub>)  $\delta$  8.41 (s, 1H), 7.86 (s, 1H), 7.77 (d,  $J = 5.8$  Hz, 1H), 7.49 (s, 1H), 7.37 (d,  $J = 5.8$  Hz, 1H), 7.20 (ddd,  $J = 20.3, 17.8, 7.6$  Hz, 8H), 7.09–6.91 (m, 5H), 6.84 (t,  $J = 7.0$  Hz, 1H), 6.74 (t,  $J = 7.6$  Hz, 3H), 6.45 (d,  $J = 7.7$  Hz, 2H), 2.49 (s, 3H). **<sup>13</sup>C NMR** (126 MHz, CDCl<sub>3</sub>)  $\delta$  164.4 (q,  $J = 5.3$  Hz), 149.9, 149.2, 143.7, 141.2, 139.9, 139.7, 137.9, 130.5, 129.7, 129.5, 128.3, 128.0, 127.9, 127.6, 127.2, 126.8, 126.5, 126.5, 124.2, 123.9, 123.0 (q,  $J = 36.6$  Hz), 122.8 (q,  $J = 270.6$  Hz), 122.4, 121.3, 121.2, 121.0, 120.2, 118.9, 112.4, 112.3, 109.8, 63.1, 60.2, 21.7. **<sup>19</sup>F NMR** (376 MHz, CDCl<sub>3</sub>)  $\delta$  -58.70. **HRMS** (ESI):  $m/z$  calcd. for C<sub>40</sub>H<sub>27</sub>N<sub>2</sub>F<sub>3</sub> [M-H]<sup>-</sup>: 591.2054; found: 591.2042. **HPLC analysis**: The enantiomeric excess was determined by HPLC with Chiralpak AD-H column (hexane/*i*-PrOH = 95/5, flow rate 1 mL·min<sup>-1</sup>,  $\lambda = 254$  nm):  $t_{\text{major}} = 6.4$  min,  $t_{\text{minor}} = 5.3$  min.

(*R*)-12-(difluoromethyl)-5b,11,11-triphenyl-5,5b,10,11-tetrahydropentaleno[1,2-b:5,6-b']diindole (**3u**)

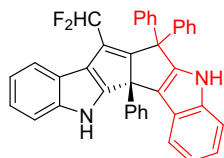

White foam, 3 d, 73% yield, 88:12 *er*,  $[a]_D^{20} = +108.00$  ( $c = 0.25$ , MeOH). **<sup>1</sup>H NMR** (500 MHz, CDCl<sub>3</sub>)  $\delta$  8.35 (s, 1H), 8.07 (s, 1H), 7.81 (d,  $J = 7.4$  Hz, 1H), 7.68 (dd,  $J = 5.9, 2.7$  Hz, 1H), 7.43–7.35 (m, 1H), 7.34–7.10 (m, 12H), 7.06 (d,  $J = 7.3$  Hz, 1H), 6.96 (t,  $J = 7.0$  Hz, 1H), 6.85 (t,  $J = 7.3$  Hz, 1H), 6.79 (d,  $J = 7.7$  Hz, 1H), 6.74 (t,  $J = 7.7$  Hz, 2H), 6.45 (d,  $J = 7.4$  Hz, 2H), 5.71–5.08 (m, 1H). **<sup>13</sup>C NMR** (126 MHz, CDCl<sub>3</sub>)  $\delta$  163.7 (t,  $J = 12.4$  Hz), 149.7, 148.8, 143.6, 141.2, 140.1, 139.9, 139.4, 132.6, 130.2, 129.6, 129.3, 129.1, 128.4, 128.3, 128.0, 127.9, 126.7, 126.5, 124.2, 122.4, 122.2, 121.8, 121.8, 121.1, 121.0, 120.9, 120.9, 119.2, 113.0, 112.6, 112.2, 111.6, 111.2, 111.1, 109.3, 62.5, 59.8. **<sup>19</sup>F NMR** (471 MHz, CDCl<sub>3</sub>)  $\delta$  -110.03 (d,  $J = 313.4$  Hz), -113.79 (d,  $J = 313.4$  Hz). **HRMS** (ESI):  $m/z$  calcd. for C<sub>39</sub>H<sub>26</sub>N<sub>2</sub>F<sub>2</sub> [M-H]<sup>-</sup>: 559.1991; found: 559.1985. **HPLC analysis**: The

enantiomeric excess was determined by HPLC with Chiralpak IA column (hexane/*i*-PrOH = 95/5, flow rate 1 mL·min<sup>-1</sup>, λ = 254 nm): *t*<sub>major</sub> = 19.6 min, *t*<sub>minor</sub> = 12.8 min.

ethyl (*R*)-5b,11,11-triphenyl-5,5b,10,11-tetrahydropentaleno[1,2-b:5,6-b']diindole-12-carboxylate (**3v**)

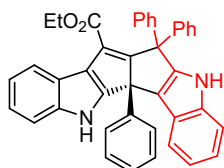

Light yellow foam, 24 h, 75% yield, 93:7 *er*, [*a*]<sub>D</sub><sup>20</sup> = +4.75 (c = 0.18, MeOH). <sup>1</sup>H NMR (400 MHz, CDCl<sub>3</sub>) δ 8.45 (s, 1H), 8.05 (s, 1H), 7.95–7.90 (m, 1H), 7.79–7.70 (m, 1H), 7.39–7.33 (m, 4H), 7.25–7.16 (m, 8H), 7.06–6.99 (m, 3H), 6.86 (t, *J* = 7.3 Hz, 2H), 6.77 (t, *J* = 7.5 Hz, 2H), 6.55 (d, *J* = 7.3 Hz, 2H), 3.95 (dd, *J* = 10.8, 7.2 Hz, 1H), 3.46 (dd, *J* = 10.8, 7.2 Hz, 1H), 1.12 (t, *J* = 7.1 Hz, 3H). <sup>13</sup>C NMR (126 MHz, CDCl<sub>3</sub>) δ 170.2, 165.3, 149.5, 149.3, 145.4, 144.2, 141.4, 140.4, 140.2, 139.6, 128.3, 127.9, 127.9, 127.3, 127.1, 126.8, 126.6, 126.6, 126.5, 124.2, 122.3, 122.2, 122.2, 121.8, 121.0, 120.9, 120.8, 120.0, 119.2, 112.5, 112.2, 111.2, 110.8, 103.3, 62.7, 60.8, 60.2, 14.1. **HRMS** (ESI): *m/z* calcd. for C<sub>41</sub>H<sub>30</sub>N<sub>2</sub>O<sub>2</sub> [M+H]<sup>+</sup>: 583.2380; found: 583.2373. **HPLC analysis**: The enantiomeric excess was determined by HPLC with Chiralpak IC column (hexane/*i*-PrOH = 90/10, flow rate 0.8 mL·min<sup>-1</sup>, λ = 245 nm): *t*<sub>major</sub> = 6.2 min, *t*<sub>minor</sub> = 6.8 min.

(*R*)-5b-cyclopropyl-11,11-diphenyl-12-(trifluoromethyl)-5,5b,10,11-tetrahydropentaleno[1,2-b:5,6-b']diindole (**3w**)

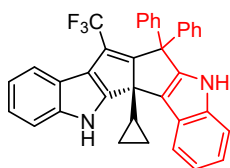

Yellow foam, 24 h, 70% yield, 85:15 *er*, [*a*]<sub>D</sub><sup>20</sup> = +26.33 (c = 0.25, MeOH). <sup>1</sup>H NMR (400 MHz, CDCl<sub>3</sub>) δ 8.74 (s, 1H), 8.07 (s, 1H), 7.87–7.80 (m, 1H), 7.68–7.64 (m, 1H), 7.51 (d, *J* = 7.9 Hz, 1H), 7.46–7.37 (m, 3H), 7.36–7.32 (m, 3H), 7.24–7.20 (m, 3H), 7.18 (s, 1H), 7.18–7.16 (m, 2H), 0.74–0.69 (m, 1H), 0.43–0.39 (m, 1H), 0.36–0.29 (m, 1H), -0.42 – -0.47 (m, 1H), -0.48 – -0.55 (m, 1H). <sup>13</sup>C NMR (126 MHz, CDCl<sub>3</sub>) δ 164.0 (q, *J* = 5.0 Hz), 150.1, 149.1, 144.3, 140.8, 140.7, 139.3, 130.0, 129.7, 129.5, 128.7, 128.5, 128.2, 127.5, 127.1, 127.1, 123.2 (q, *J* = 36.4 Hz), 122.2 (q, *J* = 277.2 Hz), 122.1, 122.1, 121.5, 121.0, 120.8, 119.9, 119.0, 112.5, 112.1, 109.5, 61.5, 60.1, 21.1, 2.5, 2.1. <sup>19</sup>F NMR (376 MHz, CDCl<sub>3</sub>) δ -58.85. **HRMS** (ESI): *m/z* calcd. for C<sub>36</sub>H<sub>26</sub>N<sub>2</sub>F<sub>3</sub> [M+H]<sup>+</sup>: 543.2043; found: 543.2041. **HPLC analysis**: The enantiomeric excess was determined by HPLC with Chiralpak AD-H column (hexane/*i*-PrOH = 90/10, flow rate 0.8 mL·min<sup>-1</sup>, λ = 280 nm): *t*<sub>major</sub> = 7.8 min, *t*<sub>minor</sub> = 6.1 min.

(*R*)-5-methyl-5b,11,11-triphenyl-12-(trifluoromethyl)-5,5b,10,11-tetrahydropentaleno[1,2-b:5,6-b']diindole (**5**)

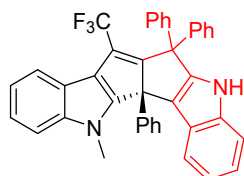

White foam, 48 h, 43% yield, 57:43 *er*, [*a*]<sub>D</sub><sup>20</sup> = +8.52 (c = 0.13, MeOH). <sup>1</sup>H NMR (500 MHz, CDCl<sub>3</sub>) δ 8.04 (s, 1H), 7.90–7.70 (m, 2H), 7.39 (dd, *J* = 11.2, 4.9 Hz, 1H), 7.34 (d, *J* = 8.1 Hz, 1H), 7.29–7.13 (m, 9H), 7.09 (d, *J*

= 7.1 Hz, 1H), 6.96 (t,  $J$  = 6.8 Hz, 3H), 6.83 (t,  $J$  = 7.3 Hz, 1H), 6.79–6.69 (m, 3H), 6.41 (d,  $J$  = 7.7 Hz, 2H), 3.81 (s, 3H).  **$^{13}\text{C}$  NMR** (126 MHz,  $\text{CDCl}_3$ )  $\delta$  163.5 (q,  $J$  = 5.0 Hz), 150.9, 150.4, 143.8, 141.6, 139.6, 139.5, 138.8, 129.7, 129.5, 128.3, 128.0, 127.9, 127.6, 127.3, 126.7, 126.5, 126.5, 124.0, 123.1 (q,  $J$  = 36.4 Hz), 122.8 (q,  $J$  = 270.5 Hz), 122.3, 121.9, 121.1, 120.8, 120.3, 119.6, 119.3, 112.7, 110.3, 110.3, 63.4, 59.5, 32.2.  **$^{19}\text{F}$  NMR** (470 MHz,  $\text{CDCl}_3$ )  $\delta$  -58.61. **HRMS** (ESI):  $m/z$  calcd. for  $\text{C}_{27}\text{H}_{19}\text{N}_2\text{F}_3$  [M-H] $^-$ : 591.2054; found: 591.2081. **HPLC analysis**: The enantiomeric excess was determined by HPLC with Chiralpak IA column (hexane/*i*-PrOH = 95/5, flow rate 1 mL·min $^{-1}$ ,  $\lambda$  = 254 nm):  $t_{\text{major}}$  = 5.6 min,  $t_{\text{minor}}$  = 6.2 min.

(*R*)-10-methyl-5b,11,11-triphenyl-12-(trifluoromethyl)-5,5b,10,11-tetrahydropentaleno[1,2-*b*:5,6-*b'*]diindole (**7**)

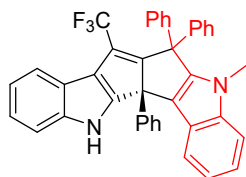

White foam, 48 h, 79% yield, 97:3 *er*,  $[\alpha]_D^{20}$  = +102.73 ( $c$  = 0.17, MeOH).  **$^1\text{H}$  NMR** (500 MHz,  $\text{CDCl}_3$ )  $\delta$  8.44 (s, 1H), 7.75 (d,  $J$  = 7.9 Hz, 2H), 7.45–7.35 (m, 2H), 7.34–7.17 (m, 9H), 7.11 (d,  $J$  = 6.6 Hz, 1H), 7.00 (dt,  $J$  = 22.8, 7.0 Hz, 3H), 6.88 (d,  $J$  = 6.4 Hz, 1H), 6.81 (t,  $J$  = 7.2 Hz, 1H), 6.72 (t,  $J$  = 7.6 Hz, 2H), 6.50 (d,  $J$  = 7.7 Hz, 2H), 3.17 (s, 3H).  **$^{13}\text{C}$  NMR** (126 MHz,  $\text{CDCl}_3$ )  $\delta$  164.4 (q,  $J$  = 4.5 Hz), 150.2, 149.6, 143.5, 141.1, 140.5 (d,  $J$  = 4.2 Hz), 140.0, 139.7, 129.6, 128.5, 128.2, 127.9, 127.8, 127.2, 126.7, 126.6, 126.3, 123.7, 122.8 (q,  $J$  = 270.7 Hz), 122.4, 122.0 (q,  $J$  = 36.4 Hz), 121.8, 121.4, 121.1, 120.7, 120.5 (d,  $J$  = 1.4 Hz), 120.1, 119.1, 112.3, 110.5, 109.0, 62.7, 60.3, 31.1.  **$^{19}\text{F}$  NMR** (470 MHz,  $\text{CDCl}_3$ )  $\delta$  -58.62. IR (ATR)  $\nu_{\text{max}}$ : 3410, 2923, 1454, 1171, 895, 739  $\text{cm}^{-1}$ . **HRMS** (ESI):  $m/z$  calcd. for  $\text{C}_{27}\text{H}_{19}\text{N}_2\text{F}_3$  [M-H] $^-$ : 591.2054; found: 591.2067. **HPLC analysis**: The enantiomeric excess was determined by HPLC with Chiralpak IA column (hexane/*i*-PrOH = 95/5, flow rate 1 mL·min $^{-1}$ ,  $\lambda$  = 254 nm):  $t_{\text{major}}$  = 6.6 min,  $t_{\text{minor}}$  = 5.3 min.

(*R*)-7a,13,13,14-tetraphenyl-12,13-dihydro-7aH-benzo[5',6']chromeno[2',3':3,4]cyclopenta[1,2-*b*]indole (**9**)

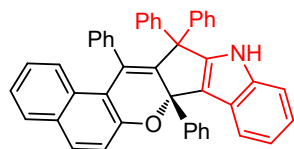

White foam, 48 h, 85% yield, 63:37 *er*,  $[\alpha]_D^{20}$  = +12.54 ( $c$  = 0.13, MeOH).  **$^1\text{H}$  NMR** (500 MHz,  $\text{CDCl}_3$ )  $\delta$  7.79–7.70 (m, 5H), 7.65 (d,  $J$  = 7.4 Hz, 2H), 7.59 (t,  $J$  = 7.4 Hz, 2H), 7.45 (d,  $J$  = 8.8 Hz, 1H), 7.39 (t,  $J$  = 7.4 Hz, 2H), 7.34 (d,  $J$  = 7.2 Hz, 1H), 7.21 (dd,  $J$  = 5.8, 3.1 Hz, 1H), 7.12 (dd,  $J$  = 5.9, 3.1 Hz, 2H), 7.10–7.02 (m, 5H), 7.00 (d,  $J$  = 8.8 Hz, 1H), 6.96 (t,  $J$  = 7.4 Hz, 1H), 6.89–6.74 (m, 6H), 6.49 (t,  $J$  = 7.4 Hz, 1H), 5.77 (d,  $J$  = 7.7 Hz, 1H).  **$^{13}\text{C}$  NMR** (126 MHz,  $\text{CDCl}_3$ )  $\delta$ : 154.0, 149.9, 143.8, 143.4, 142.1, 142.1, 141.0, 139.7, 136.1, 131.2, 131.0, 130.8, 130.3, 130.3, 129.6, 129.1, 128.2, 128.1, 127.8, 127.6, 127.4, 127.2, 127.2, 127.1, 126.9, 126.6, 126.1, 125.5, 125.1, 122.8, 122.5, 122.4, 120.8, 120.7, 120.0, 119.7, 118.2, 112.0, 86.4, 62.0. **HRMS** (ESI):  $m/z$  calcd. for  $\text{C}_{27}\text{H}_{19}\text{N}_2\text{F}_3$  [M-H] $^-$ : 612.2474; found: 612.2469. **HPLC analysis**: The enantiomeric excess was determined by HPLC with Chiralpak IB column (hexane/*i*-PrOH = 95/5, flow rate 1 mL·min $^{-1}$ ,  $\lambda$  = 254 nm):  $t_{\text{major}}$  = 8.2 min,  $t_{\text{minor}}$  = 7.3 min.

## 5. References

- [1] a) Zhu, W.-R.; Su, Q.; Deng, X.-Y.; Liu, J.-S.; Zhong, T.; Meng, S.-S.; Yi, J.-T.; Weng, J.; Lu, G., *Chem. Sci.*, **2022**, *13*, 170–177; b) Zhu, W.-R.; Su, Q.; Diao, H.-J.; Wang, E.-X.; Wu, F.; Zhao, Y.-L.; Weng, J.; Lu,



G., *Org. Lett.*, **2022**, *22*, 6873–6878; c) Li, T.-Z.; Liu, S.-J.; Sun, Y.-W.; Deng, S.; Tan, W.; Jiao, Y.; Zhang Y.-C.; Shi, F., *Angew. Chem., Int. Ed.*, **2021**, *60*, 2355–2363.

## 6. Data for X-Ray Crystal Structure of 3e

**Table 1** Crystal data and structure refinement for 3e.

|                                             |                                                                                    |
|---------------------------------------------|------------------------------------------------------------------------------------|
| Compound                                    | 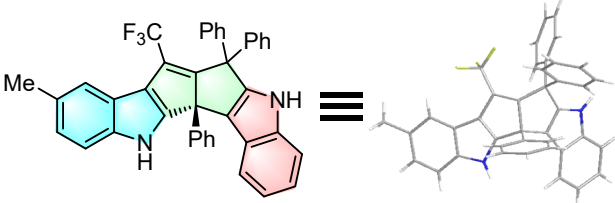 |
| Empirical formula                           | C <sub>40</sub> H <sub>27</sub> F <sub>3</sub> N <sub>2</sub>                      |
| Formula weight                              | 592.63                                                                             |
| Temperature/K                               | 99.99(10)                                                                          |
| Crystal system                              | hexagonal                                                                          |
| Space group                                 | P65                                                                                |
| a/Å                                         | 19.97510(10)                                                                       |
| b/Å                                         | 19.97510(10)                                                                       |
| c/Å                                         | 13.78270(10)                                                                       |
| α/°                                         | 90                                                                                 |
| β/°                                         | 90                                                                                 |
| γ/°                                         | 120                                                                                |
| Volume/Å <sup>3</sup>                       | 4762.58(6)                                                                         |
| Z                                           | 6                                                                                  |
| ρ <sub>calc</sub> /cm <sup>3</sup>          | 1.240                                                                              |
| μ/mm <sup>-1</sup>                          | 0.687                                                                              |
| F(000)                                      | 1848.0                                                                             |
| Crystal size/mm <sup>3</sup>                | 0.25 × 0.2 × 0.2                                                                   |
| Radiation                                   | Cu Kα (λ = 1.54184)                                                                |
| 2θ range for data collection/°              | 5.108 to 157.992                                                                   |
| Index ranges                                | -25 ≤ h ≤ 25, -25 ≤ k ≤ 23, -17 ≤ l ≤ 17                                           |
| Reflections collected                       | 65556                                                                              |
| Independent reflections                     | 6834 [R <sub>int</sub> = 0.0528, R <sub>sigma</sub> = 0.0228]                      |
| Data/restraints/parameters                  | 6834/1/407                                                                         |
| Goodness-of-fit on F <sup>2</sup>           | 1.064                                                                              |
| Final R indexes [I ≥ 2σ (I)]                | R <sub>1</sub> = 0.0273, wR <sub>2</sub> = 0.0712                                  |
| Final R indexes [all data]                  | R <sub>1</sub> = 0.0276, wR <sub>2</sub> = 0.0715                                  |
| Largest diff. peak/hole / e Å <sup>-3</sup> | 0.13/-0.18                                                                         |
| Flack parameter                             | -0.01(4)                                                                           |

## 7. Copies of NMR Spectra

### <sup>1</sup>H NMR of compound 3a (in CDCl<sub>3</sub>)

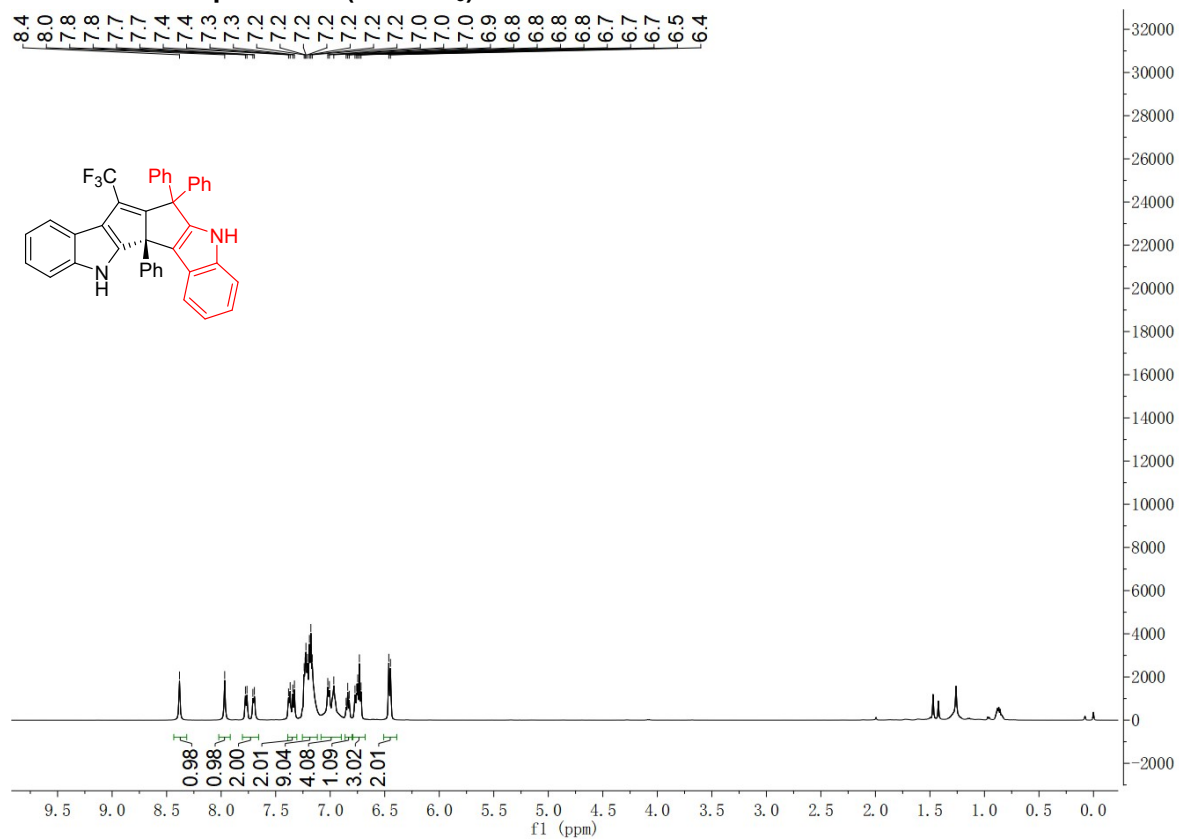

### <sup>13</sup>C NMR of compound 3a (in CDCl<sub>3</sub>)

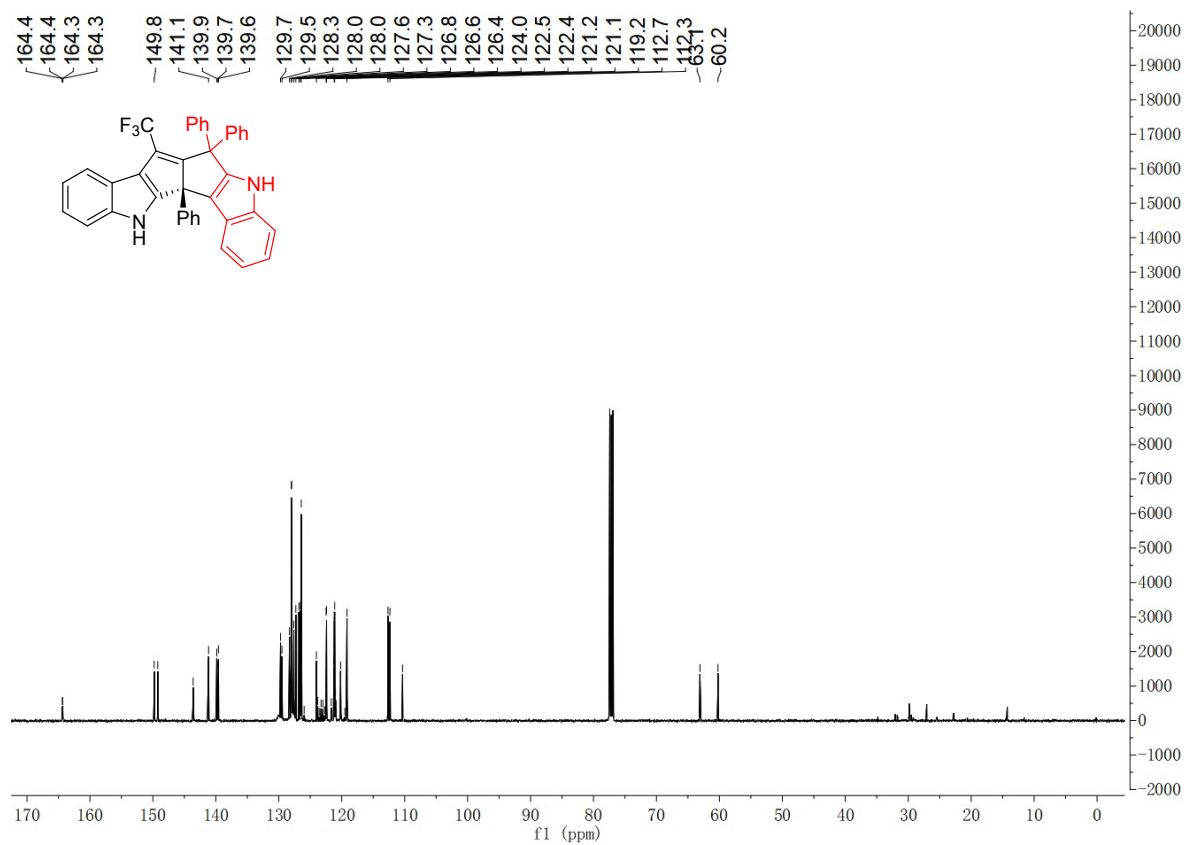

### <sup>19</sup>F NMR of compound 3a (in CDCl<sub>3</sub>)

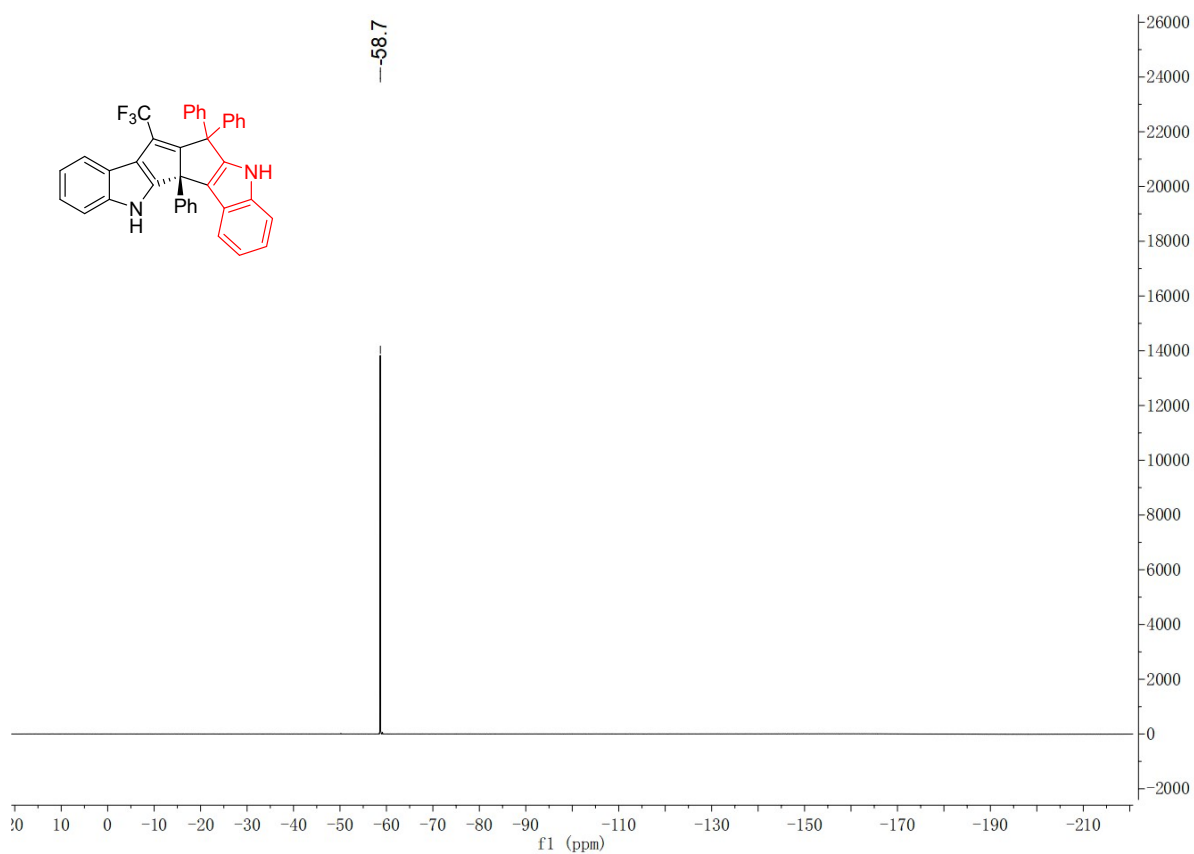

### <sup>1</sup>H NMR of compound 3b (in CDCl<sub>3</sub>)

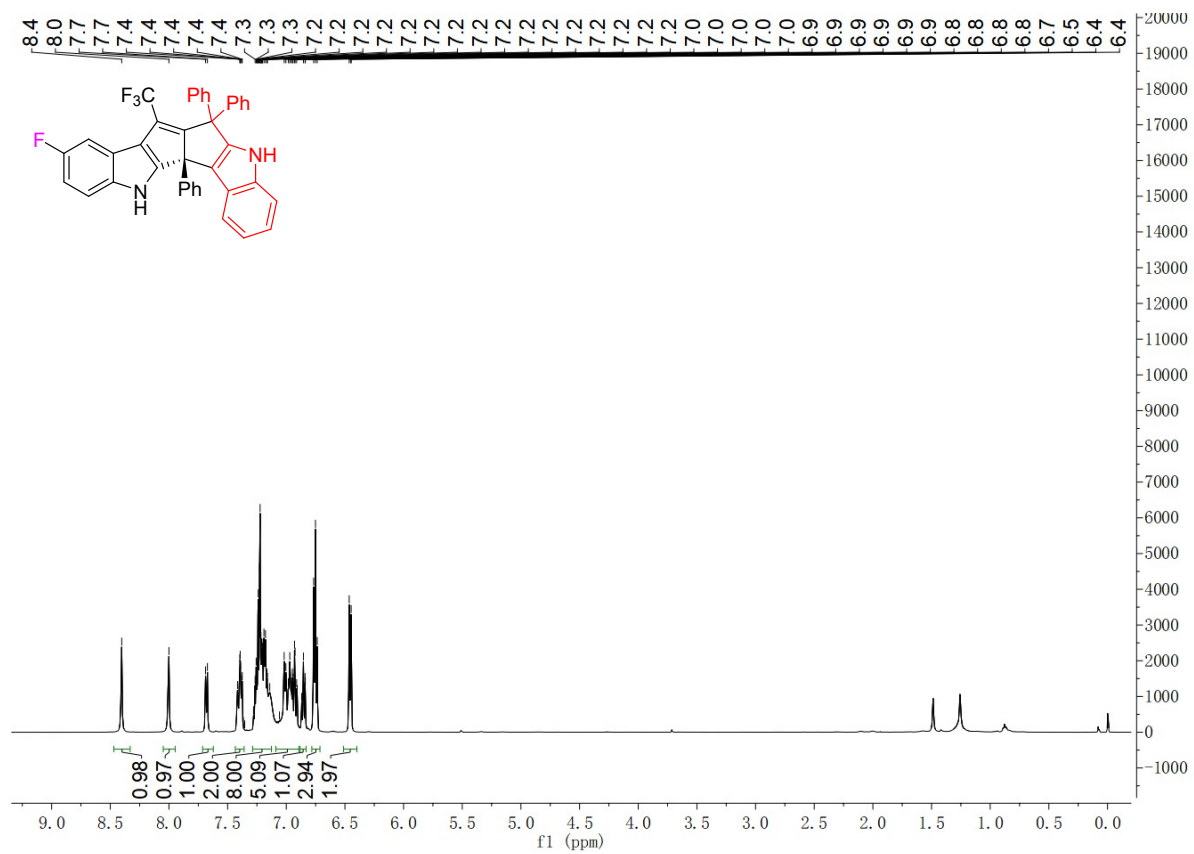

### <sup>13</sup>C NMR of compound 3b (in CDCl<sub>3</sub>)

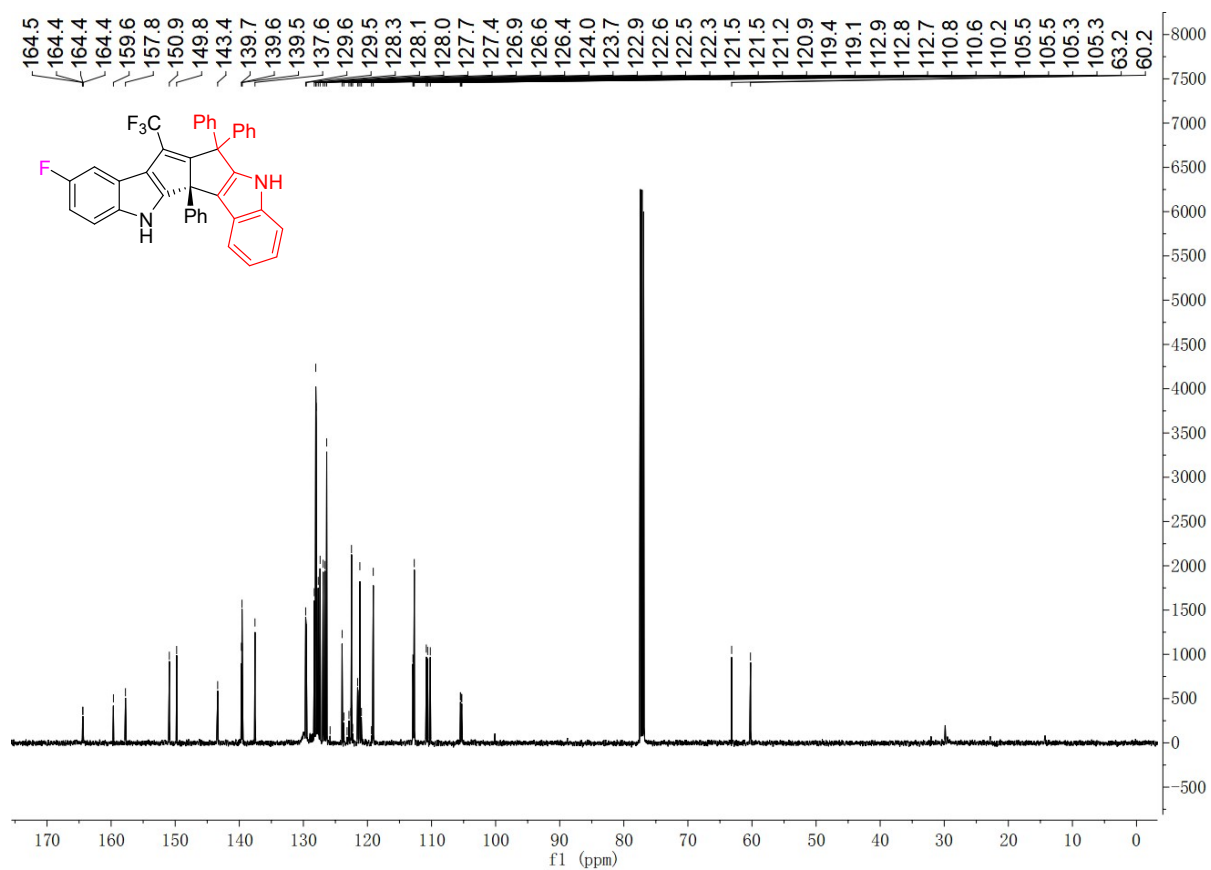

### <sup>19</sup>F NMR of compound 3b (in CDCl<sub>3</sub>)

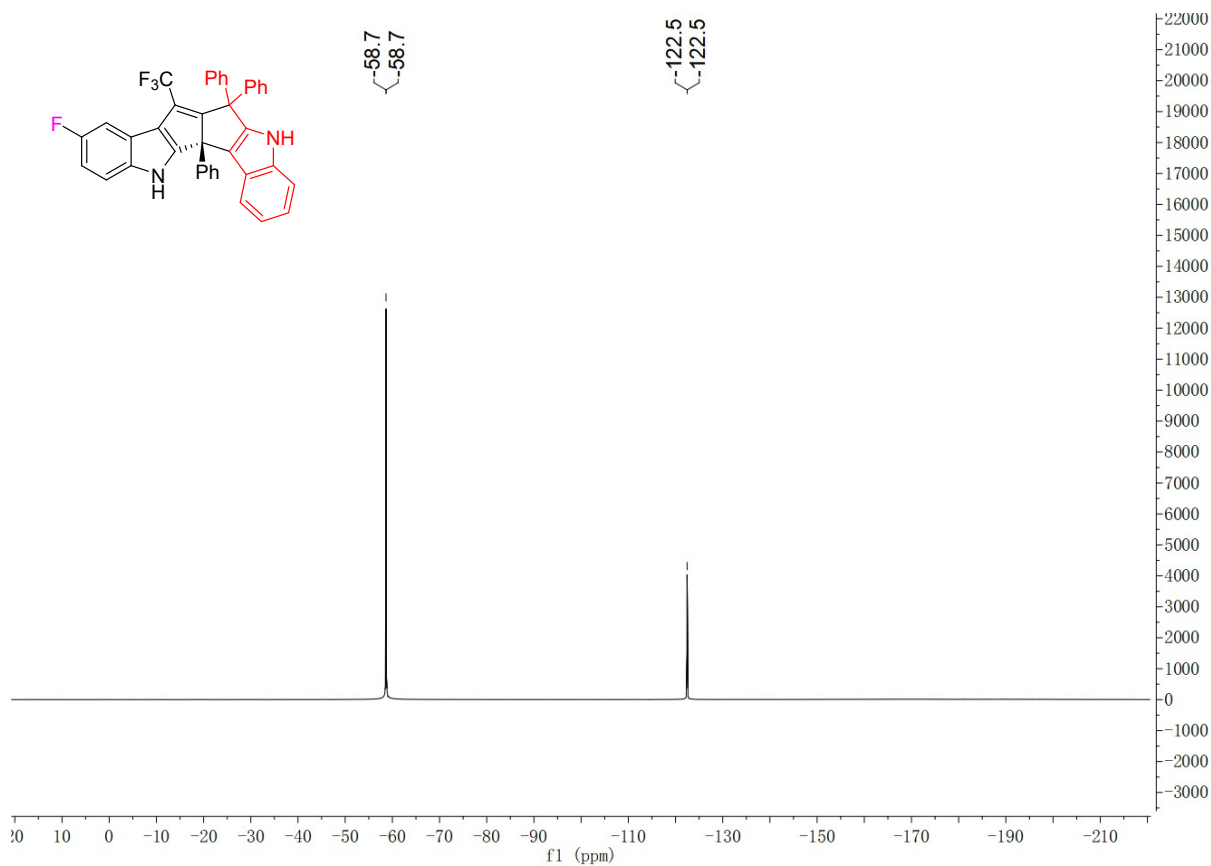

### <sup>1</sup>H NMR of compound 3c (in CDCl<sub>3</sub>)

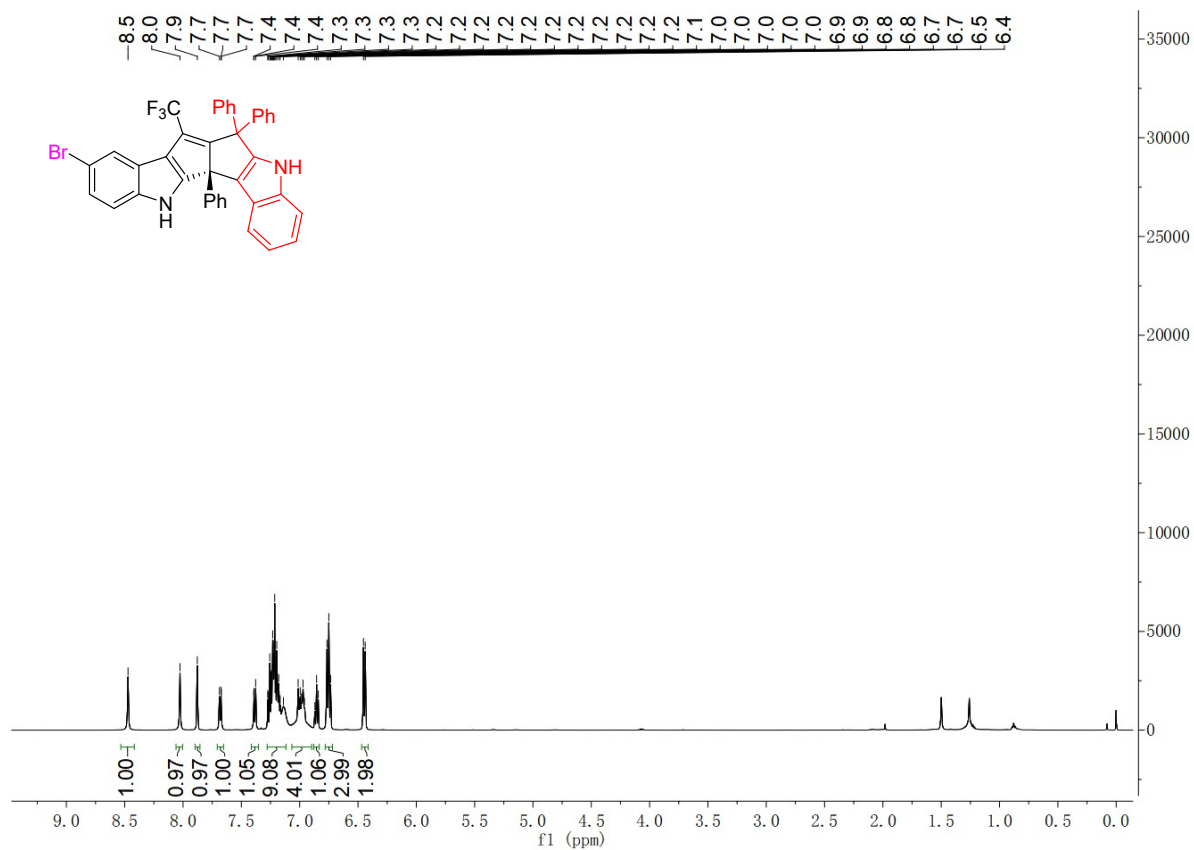

### <sup>13</sup>C NMR of compound 3c (in CDCl<sub>3</sub>)

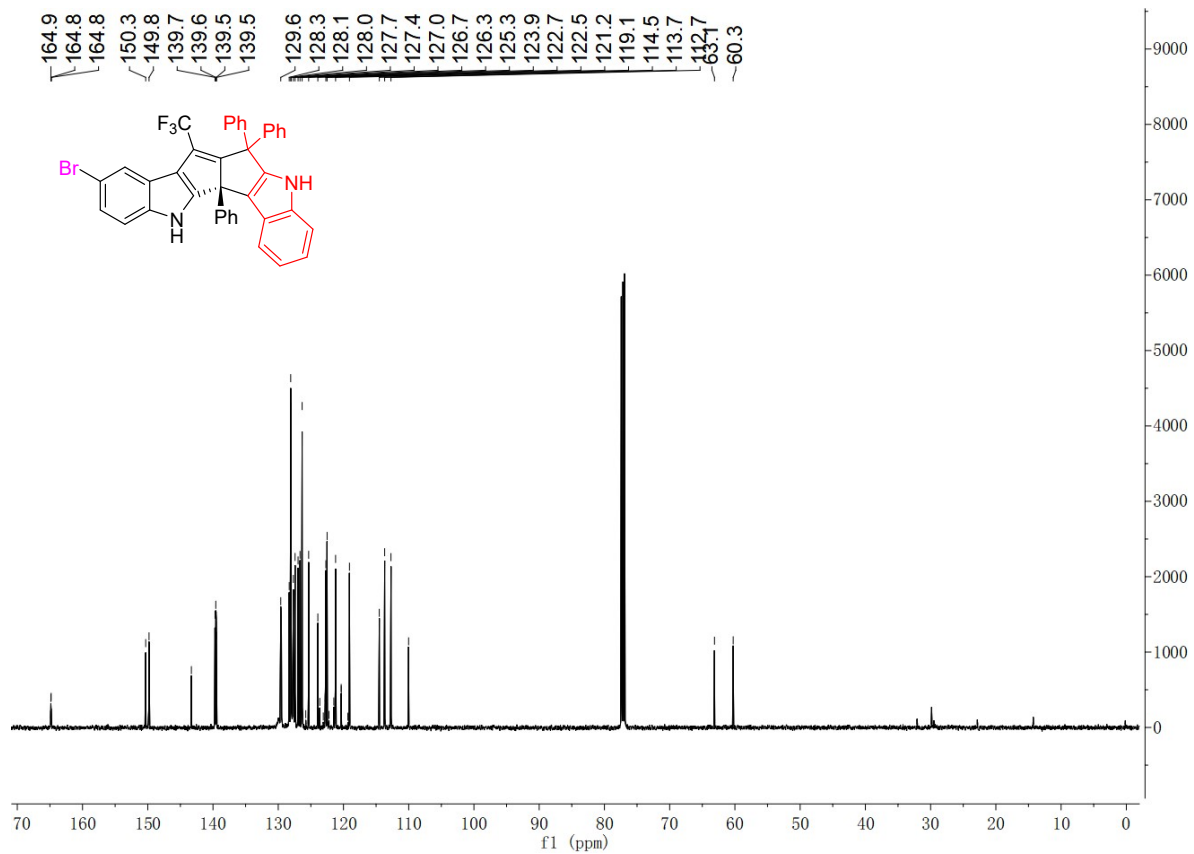

### $^{19}\text{F}$ NMR of compound 3c (in $\text{CDCl}_3$ )

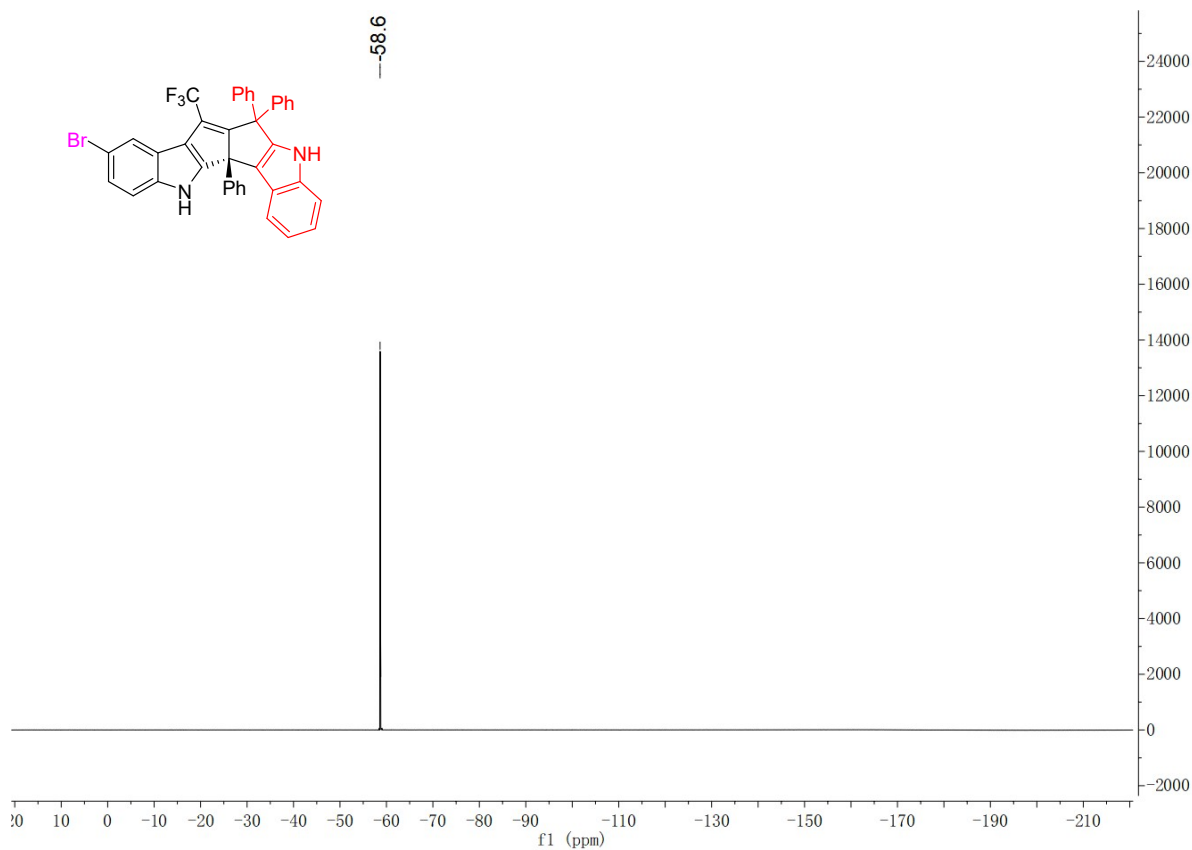

### $^1\text{H}$ NMR of compound 3d (in $\text{CDCl}_3$ )

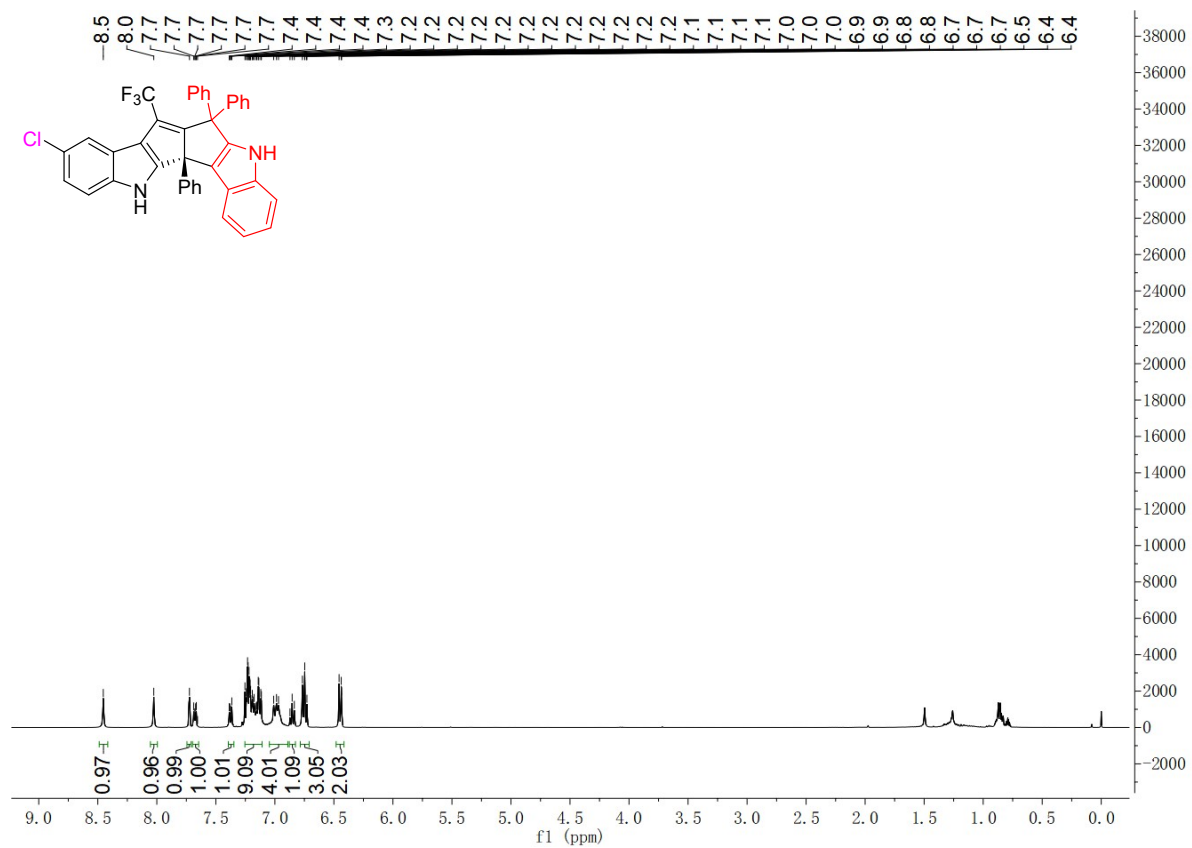

### <sup>13</sup>C NMR of compound 3d (in CDCl<sub>3</sub>)

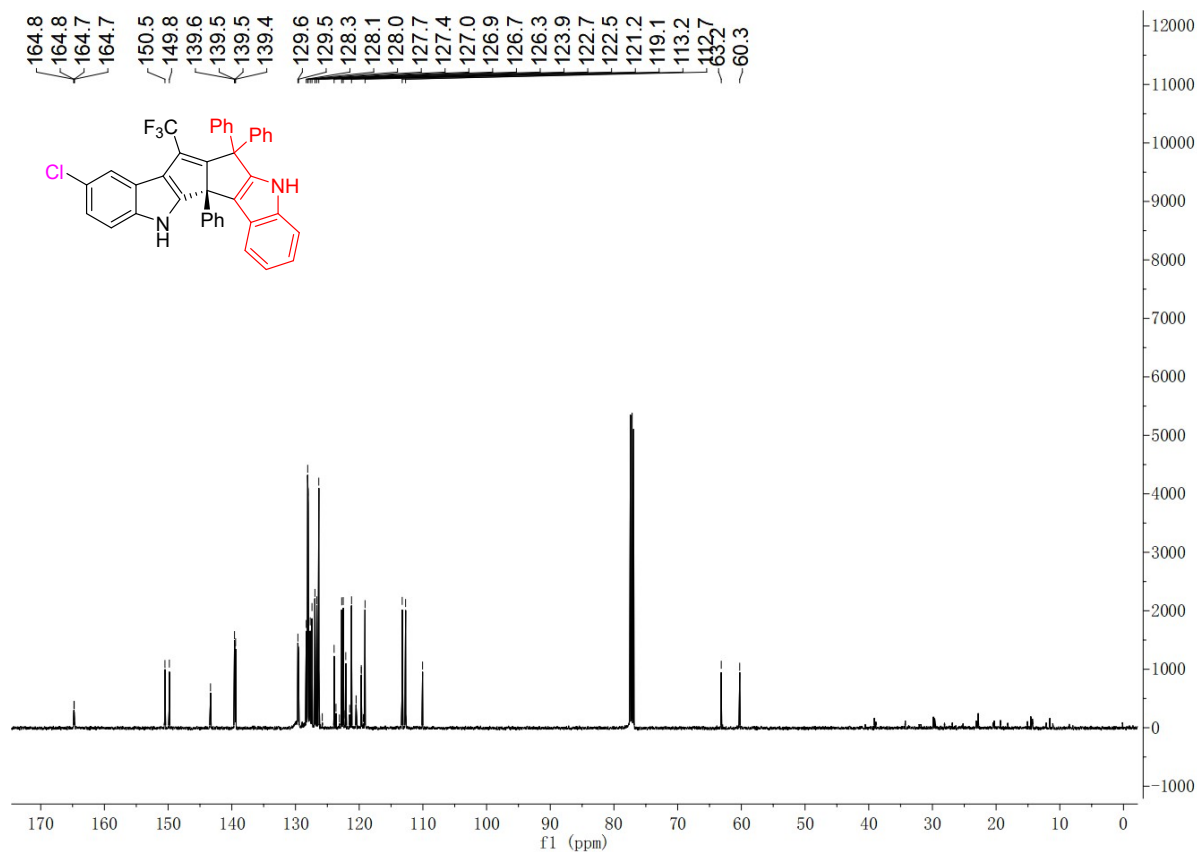

### <sup>19</sup>F NMR of compound 3d (in CDCl<sub>3</sub>)

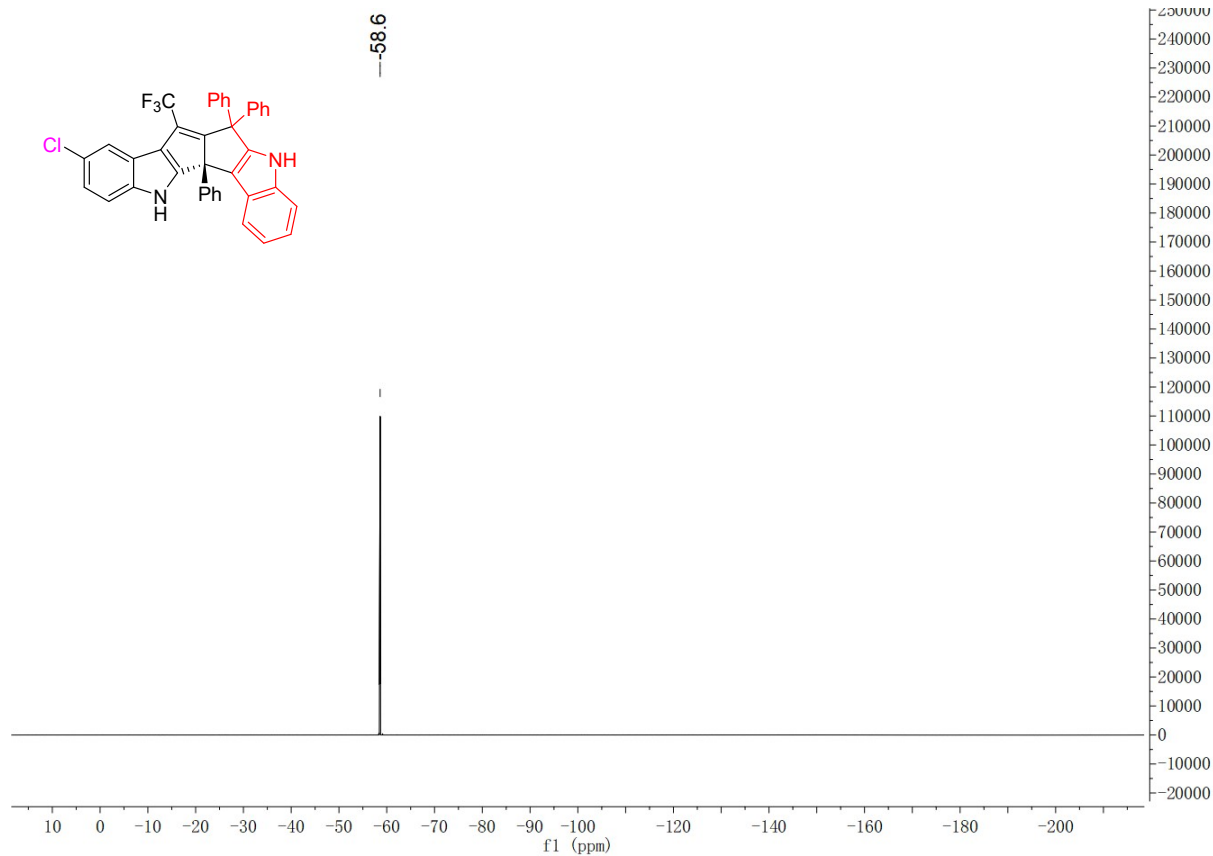



### <sup>1</sup>H NMR of compound 3e (in CDCl<sub>3</sub>)

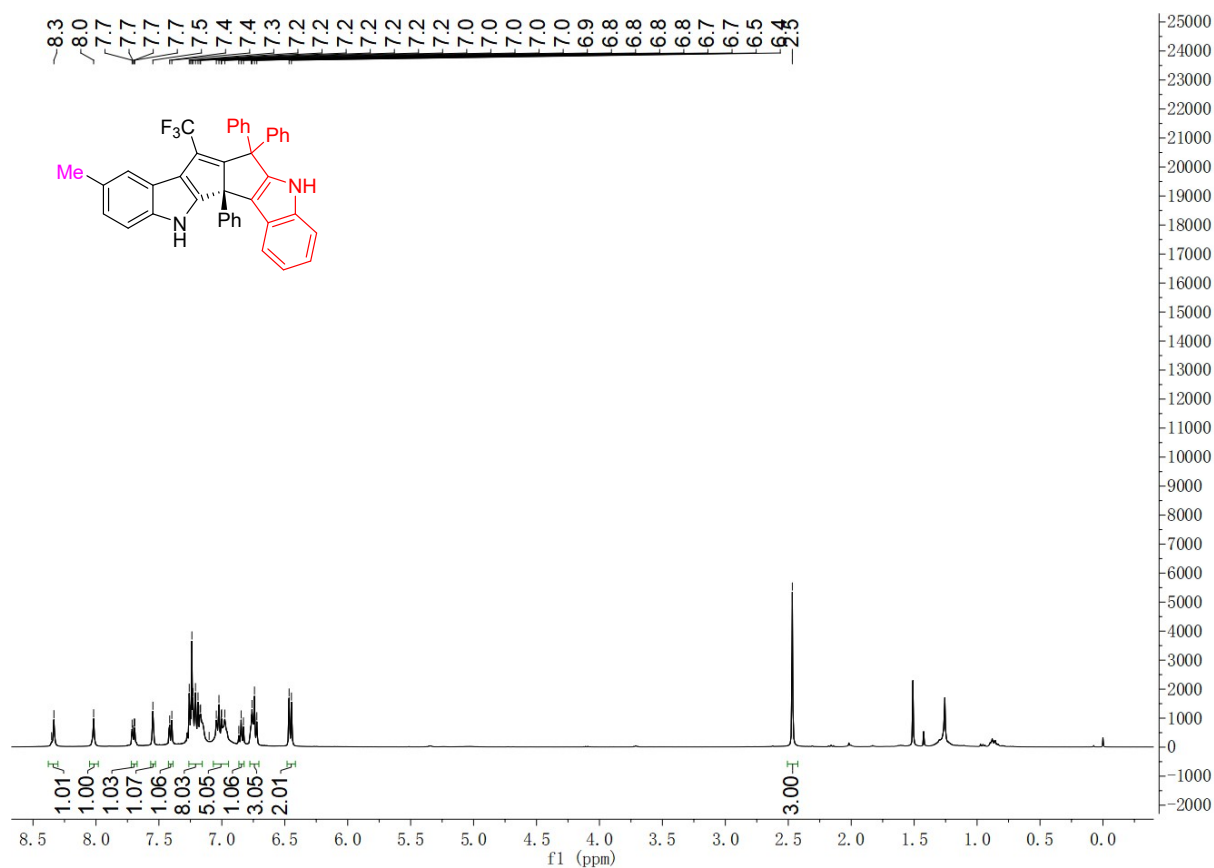

### <sup>13</sup>C NMR of compound 3e (in CDCl<sub>3</sub>)

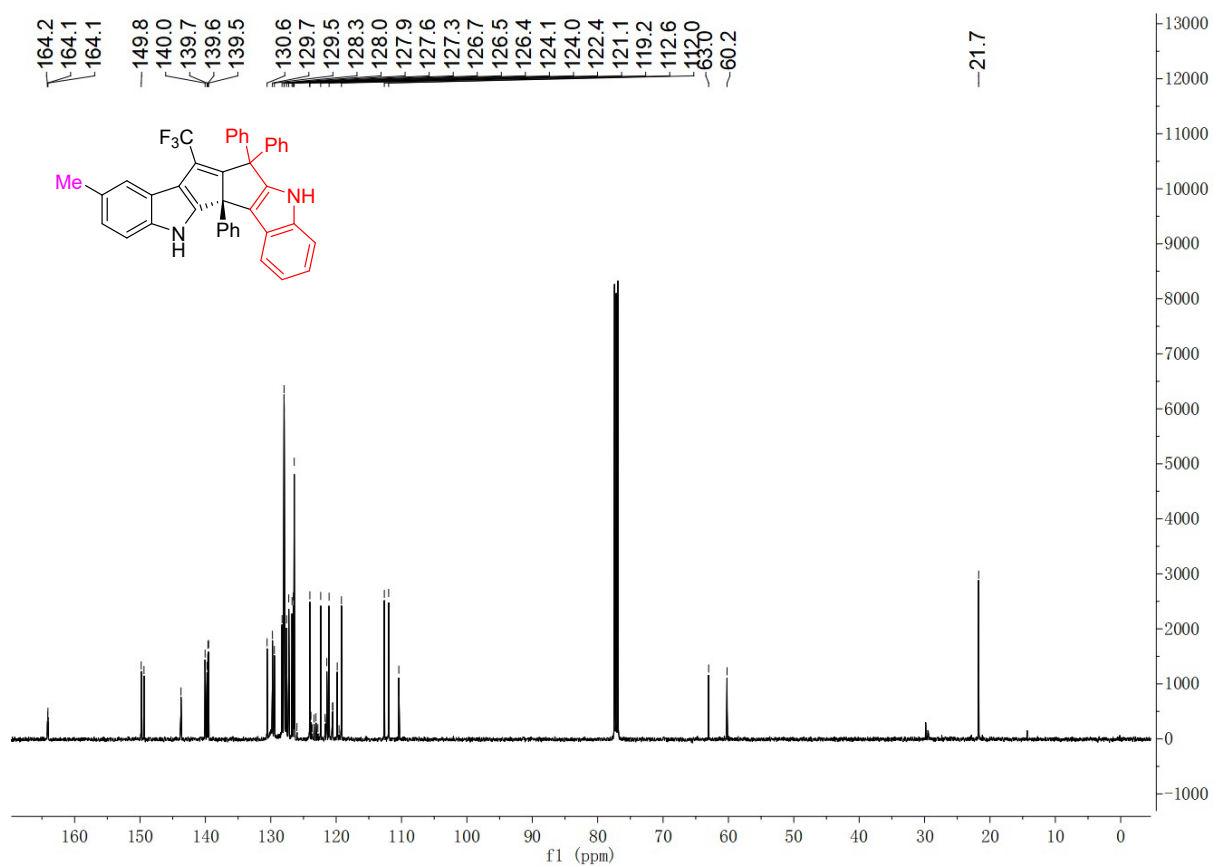

### $^{19}\text{F}$ NMR of compound 3e (in $\text{CDCl}_3$ )

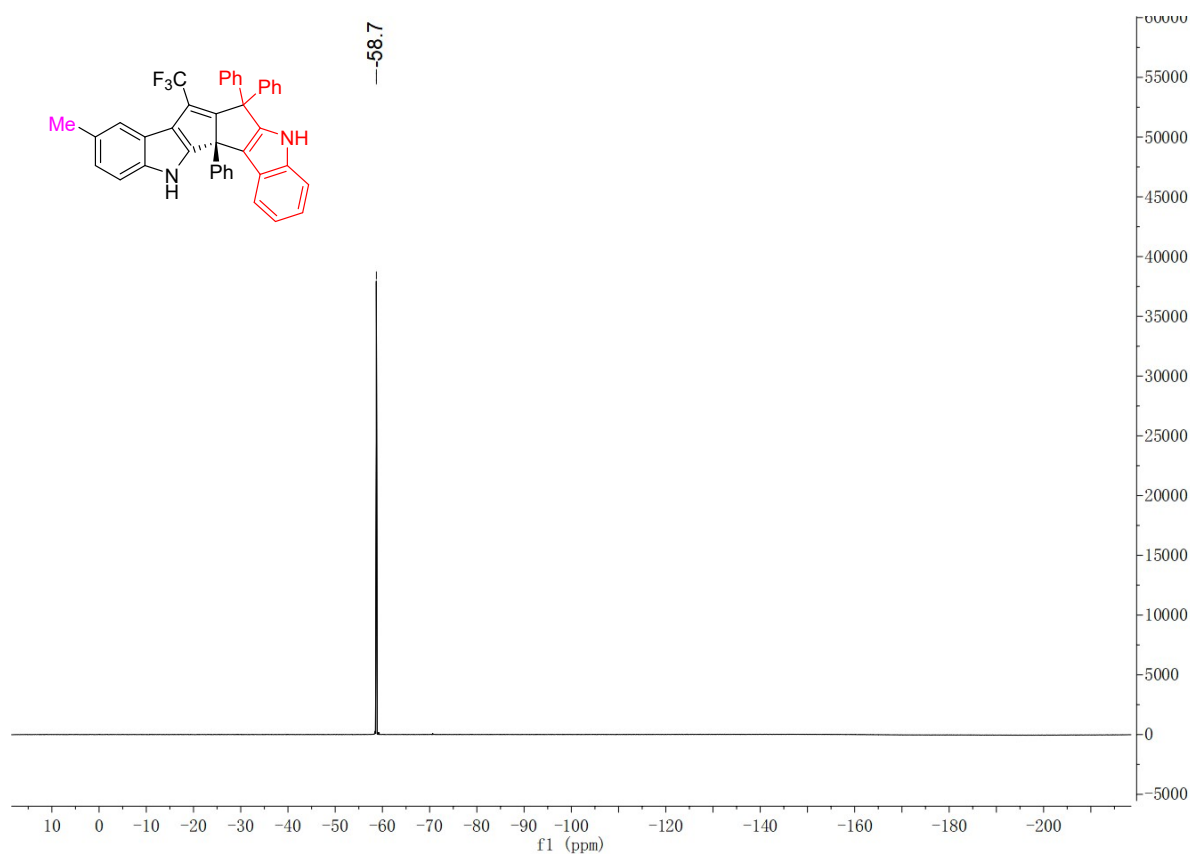

### $^1\text{H}$ NMR of compound 3f (in $\text{CDCl}_3$ )

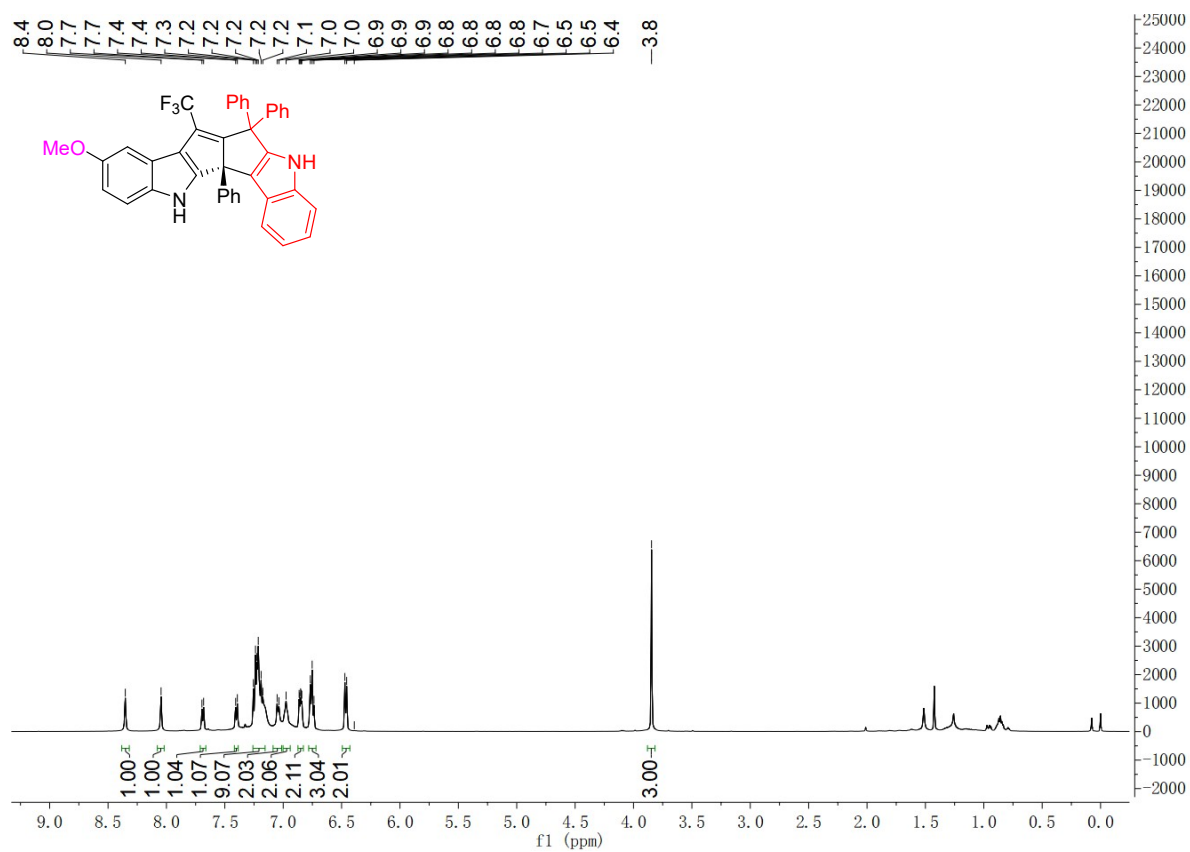

### <sup>13</sup>C NMR of compound 3f (in CDCl<sub>3</sub>)

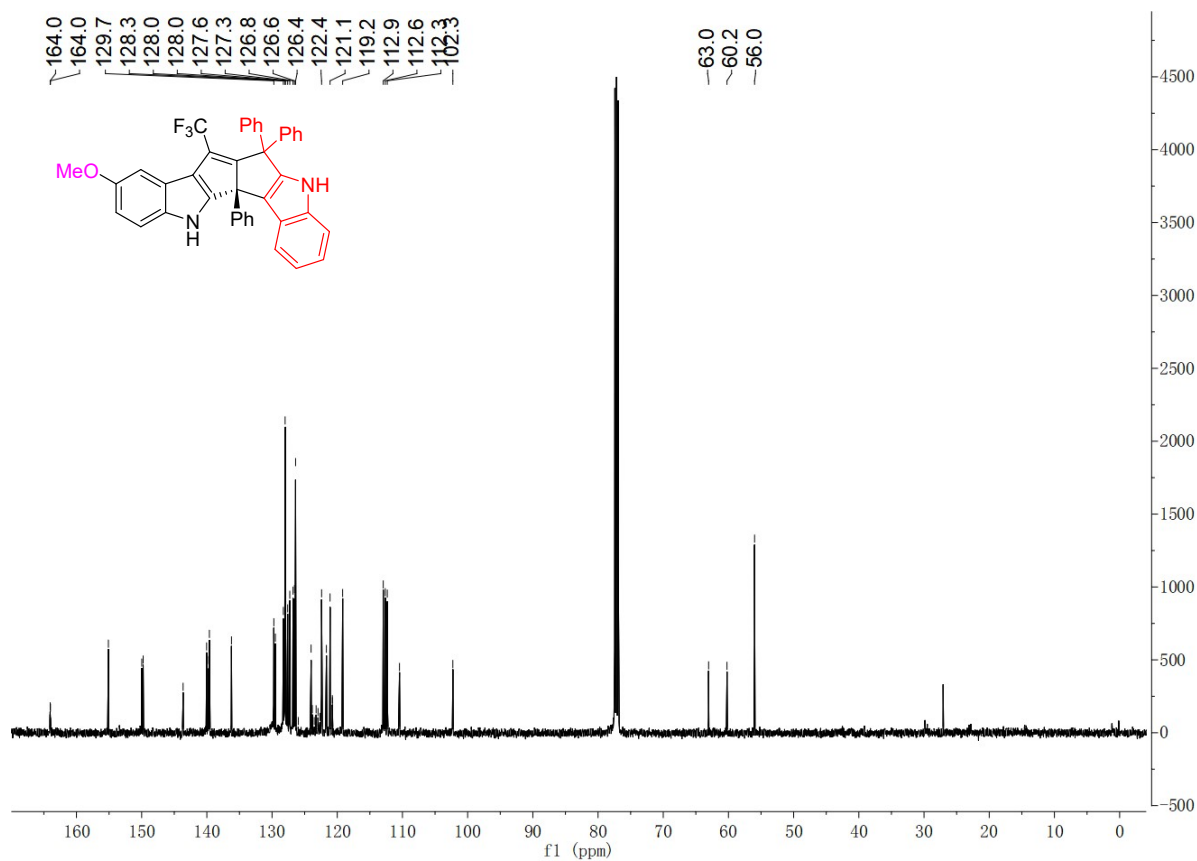

### <sup>19</sup>F NMR of compound 3f (in CDCl<sub>3</sub>)

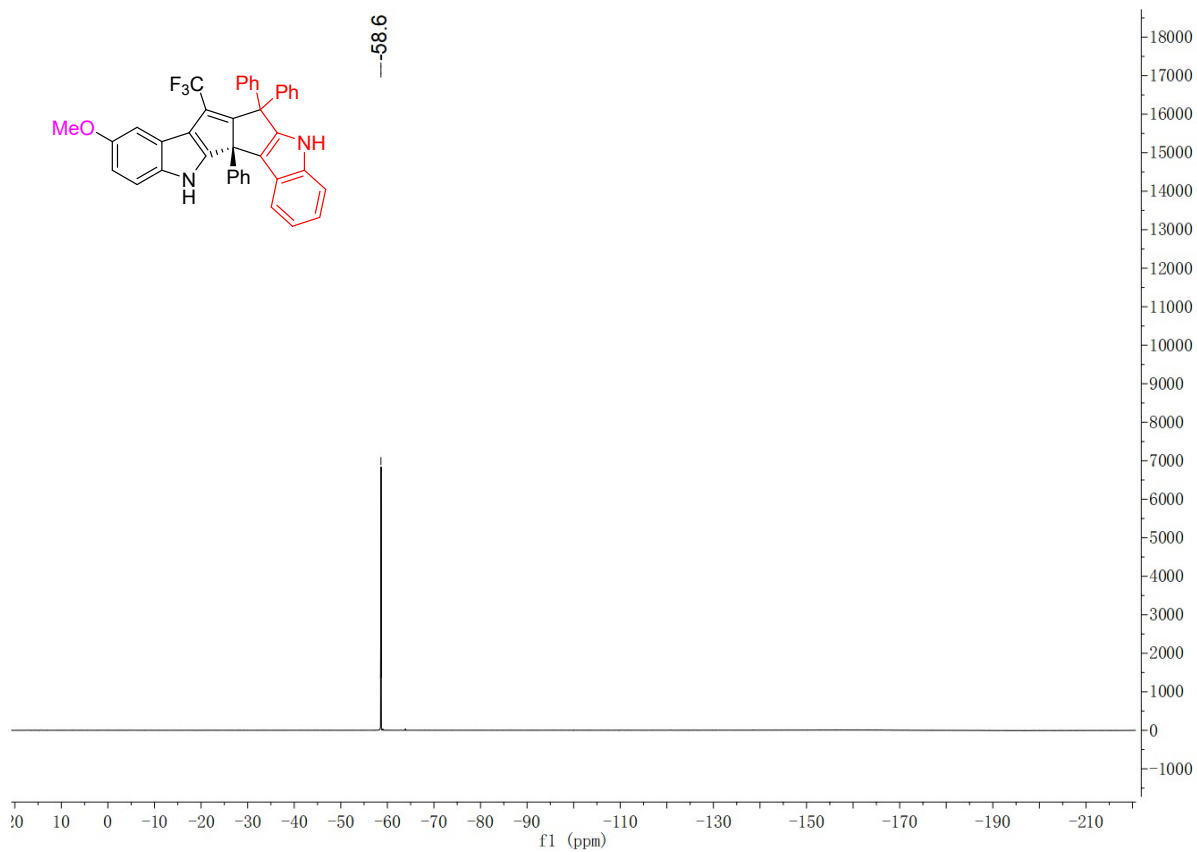

### <sup>1</sup>H NMR of compound 3g (in CDCl<sub>3</sub>)

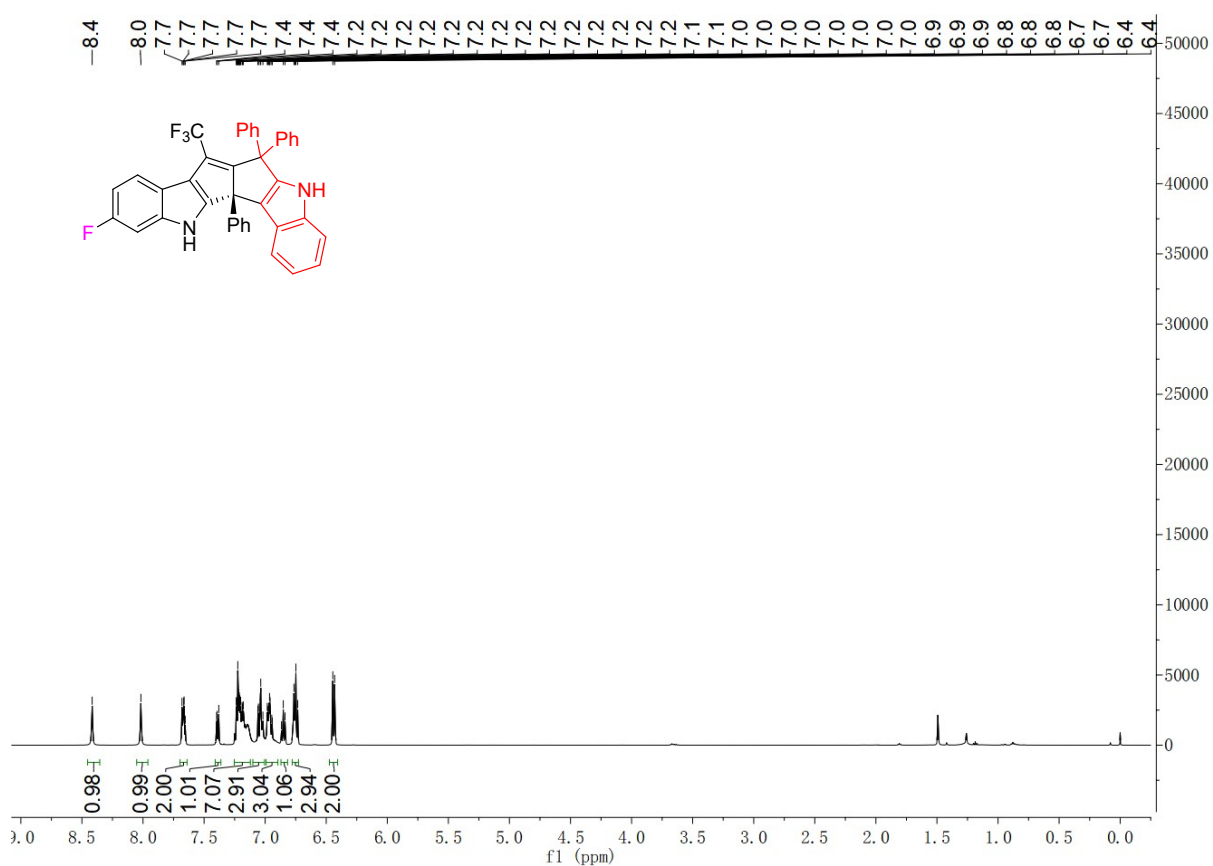

### <sup>13</sup>C NMR of compound 3g (in CDCl<sub>3</sub>)

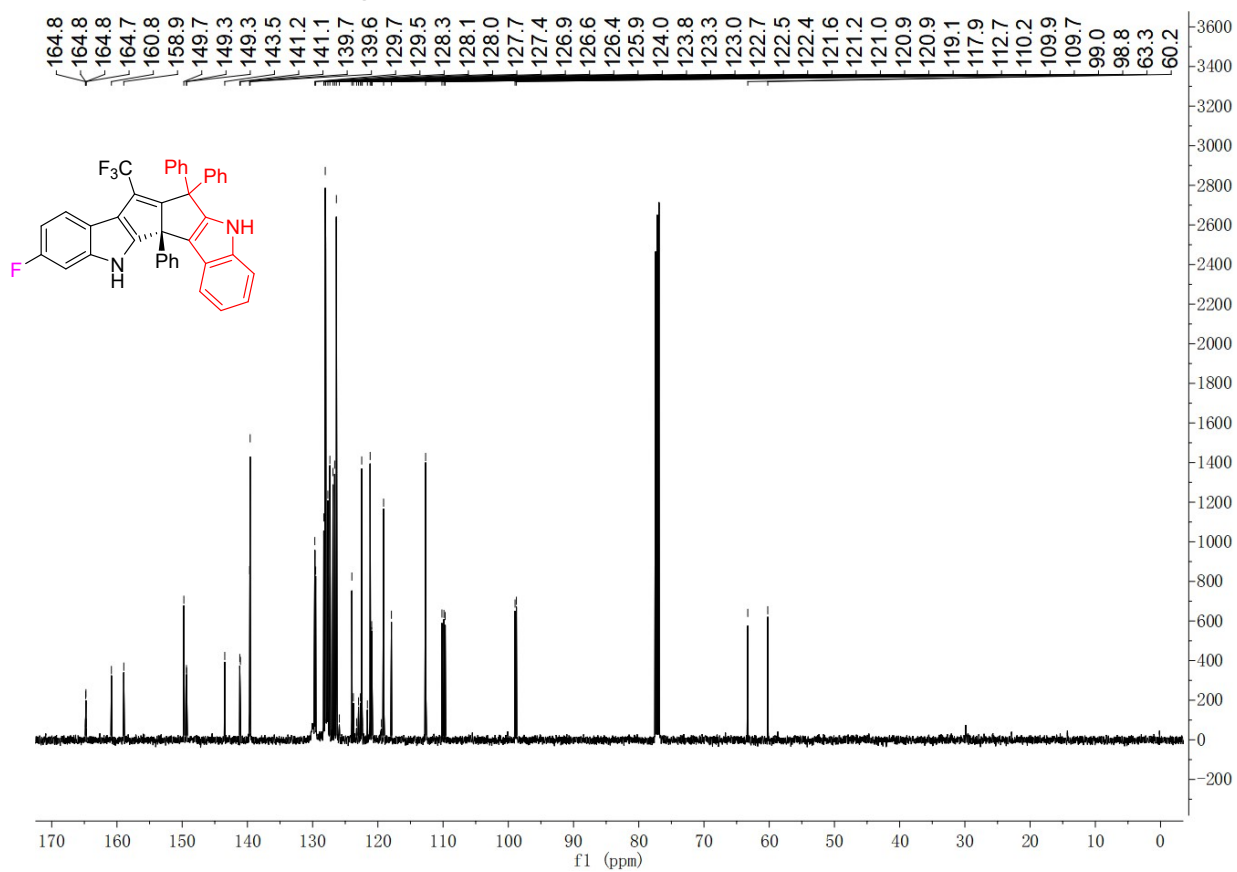

### $^{19}\text{F}$ NMR of compound 3g (in $\text{CDCl}_3$ )

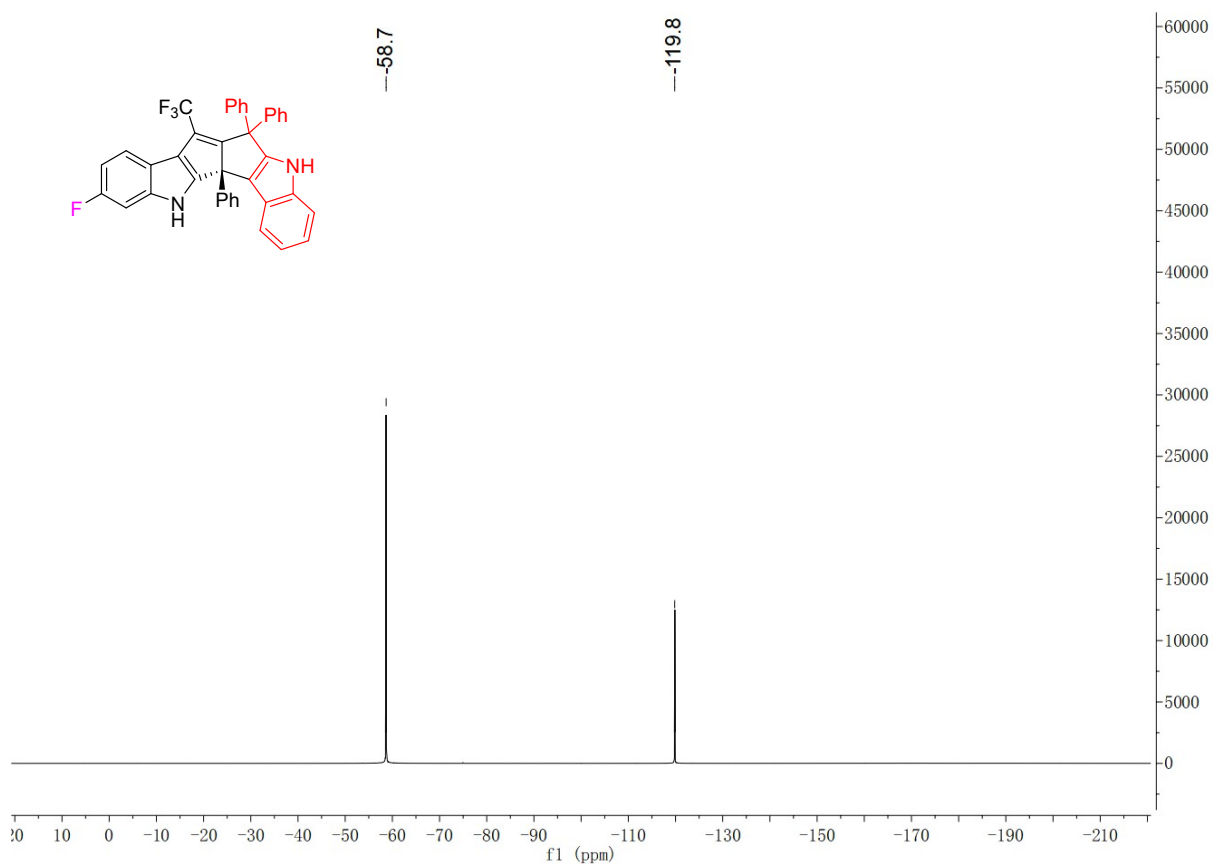

### $^1\text{H}$ NMR of compound 3h (in $\text{CDCl}_3$ )

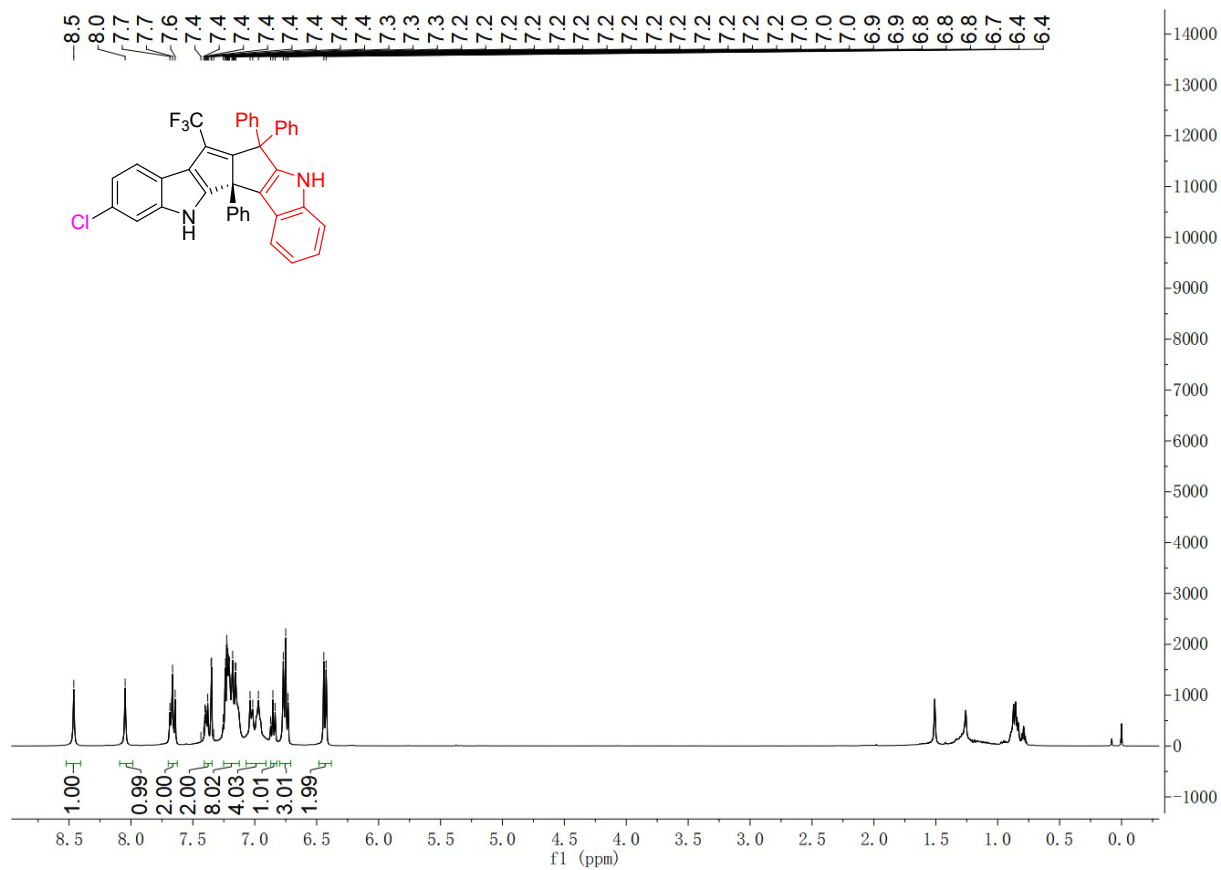

### <sup>13</sup>C NMR of compound 3h (in CDCl<sub>3</sub>)

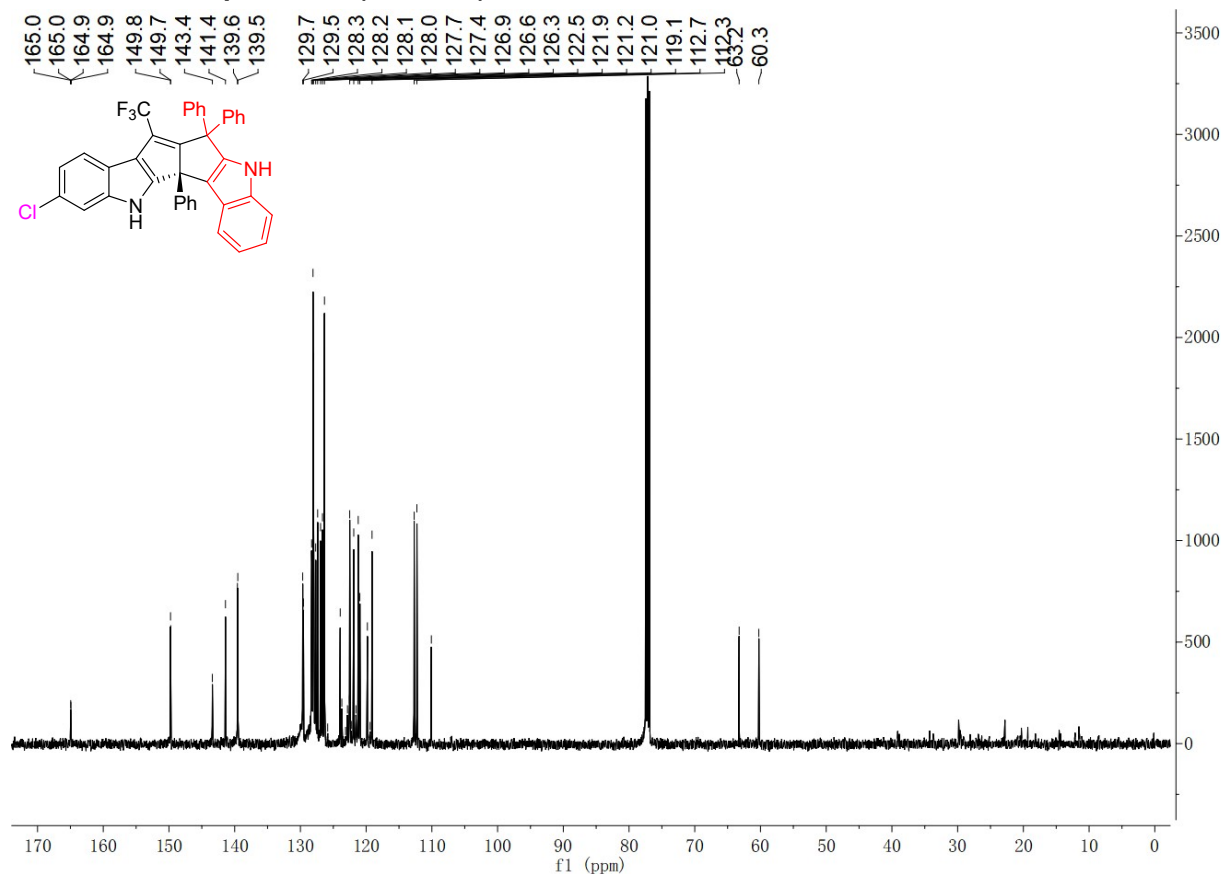

### <sup>19</sup>F NMR of compound 3h (in CDCl<sub>3</sub>)

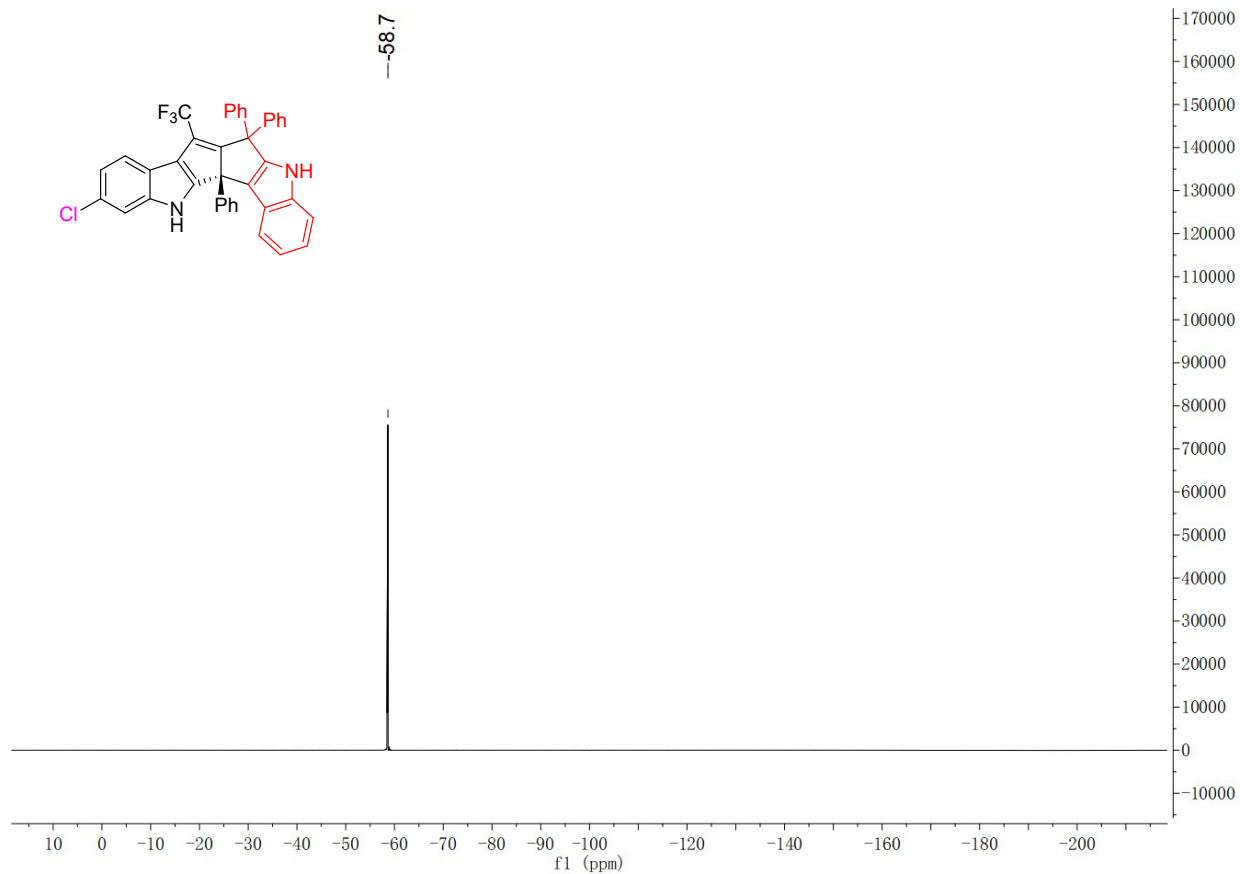

### <sup>1</sup>H NMR of compound 3i (in CDCl<sub>3</sub>)

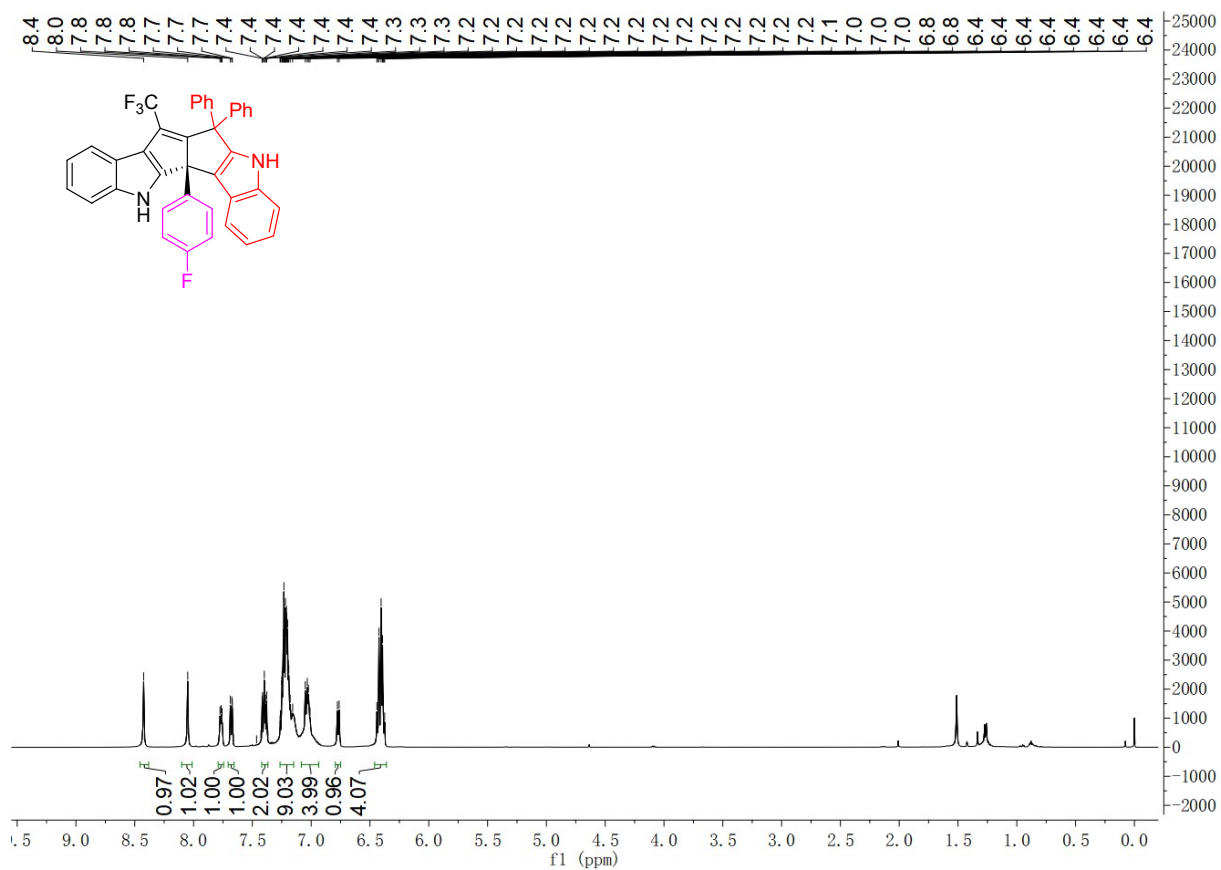

### <sup>13</sup>C NMR of compound 3i (in CDCl<sub>3</sub>)

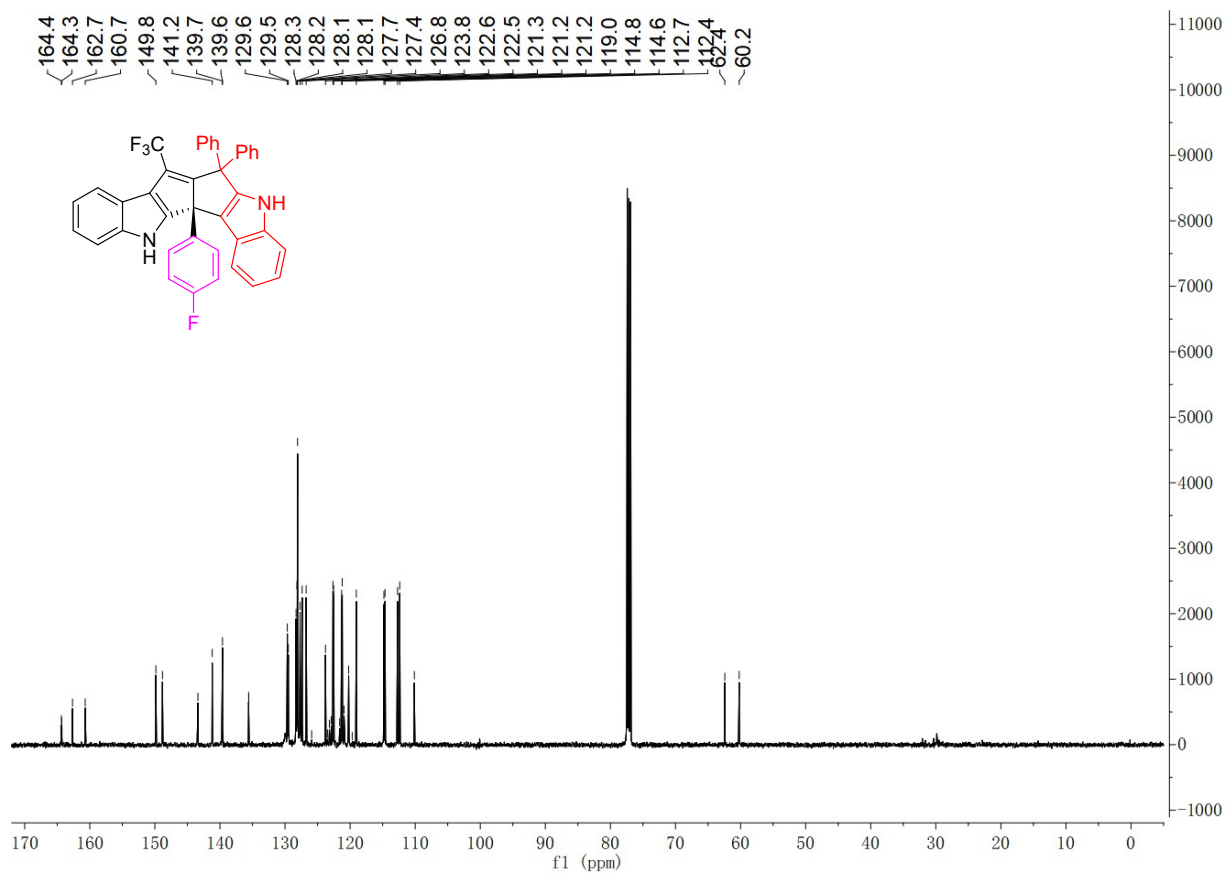





### <sup>13</sup>C NMR of compound 3j (in CDCl<sub>3</sub>)

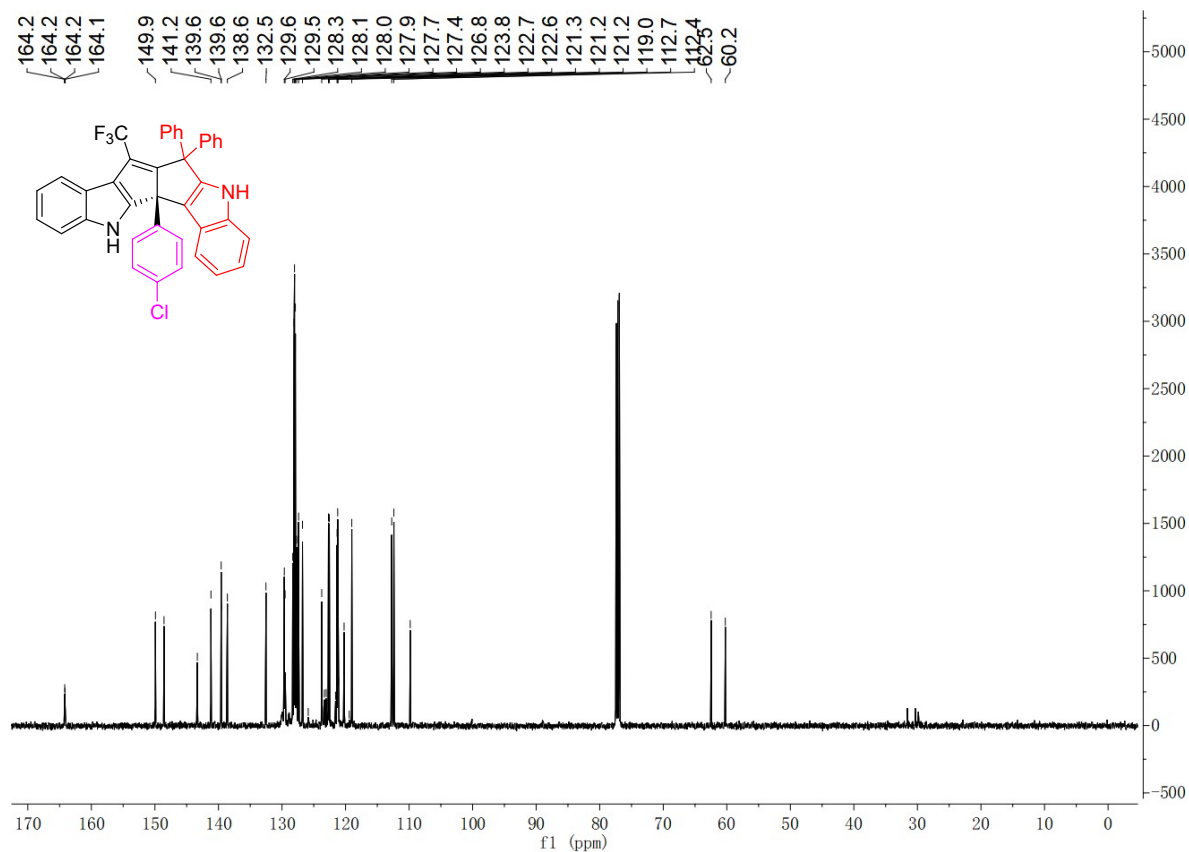

### <sup>19</sup>F NMR of compound 3j (in CDCl<sub>3</sub>)

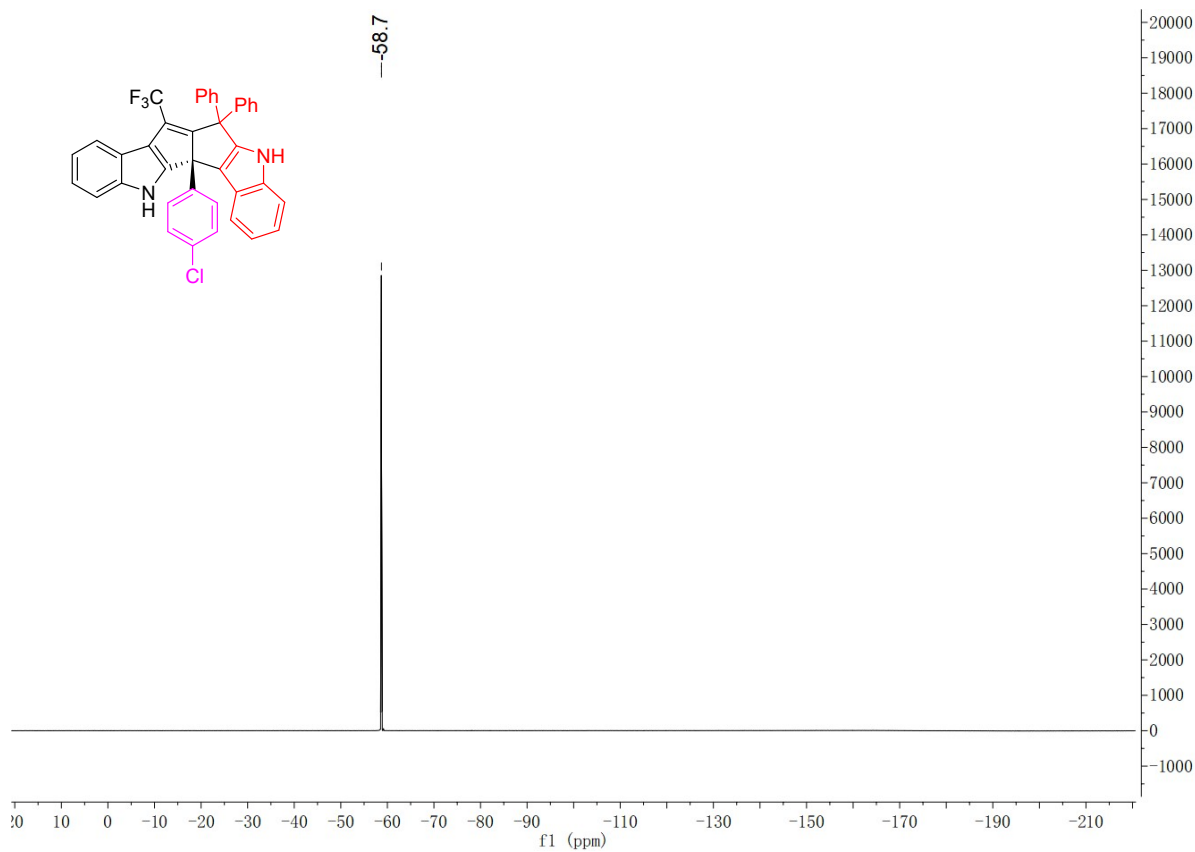

### <sup>1</sup>H NMR of compound 3k (in CDCl<sub>3</sub>)

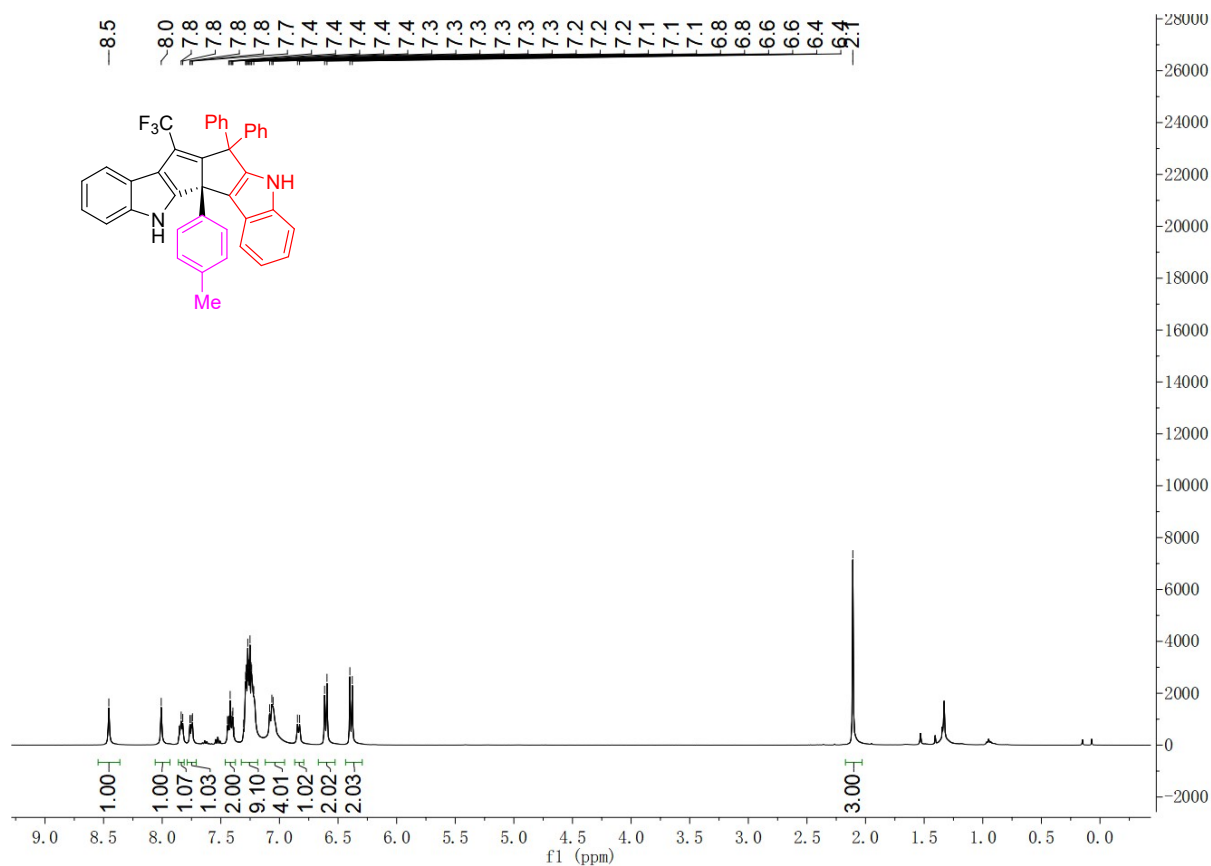

### <sup>13</sup>C NMR of compound 3k (in CDCl<sub>3</sub>)

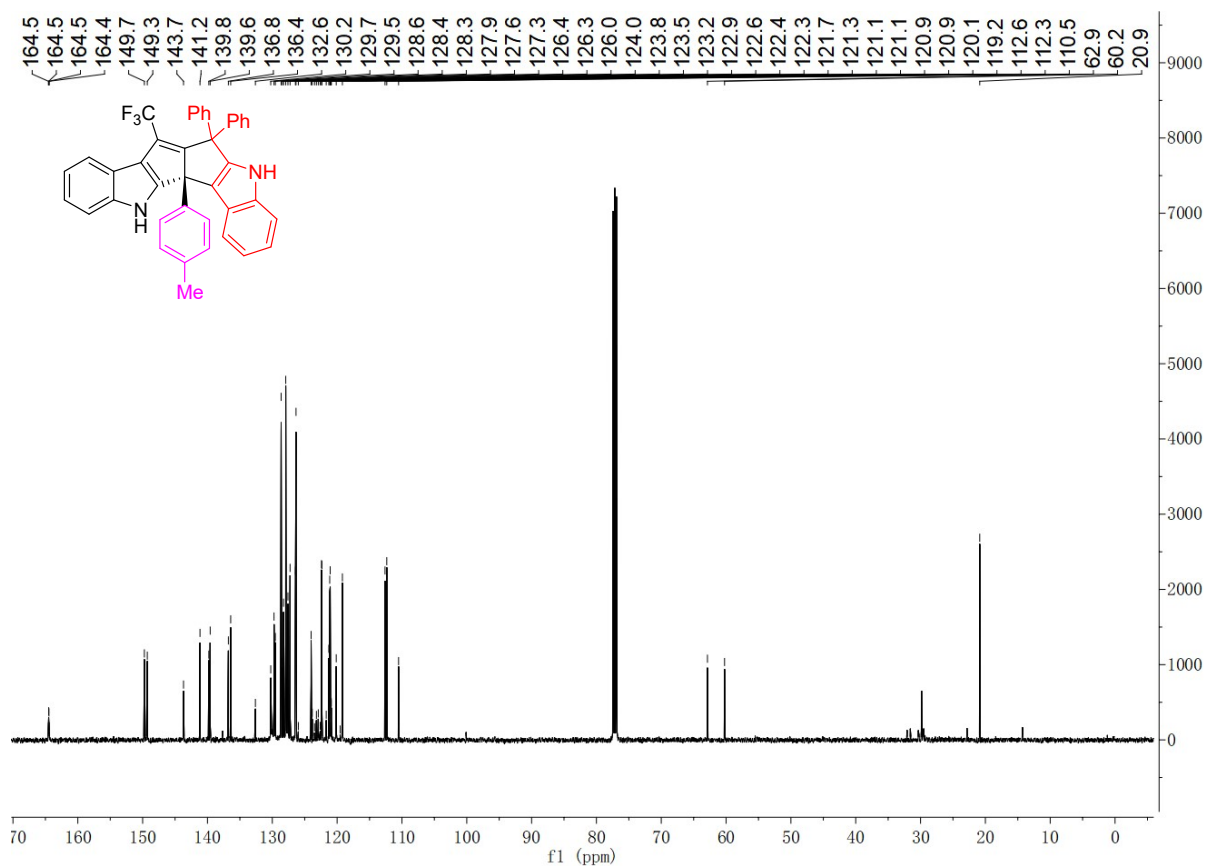

### $^{19}\text{F}$ NMR of compound 3k (in $\text{CDCl}_3$ )

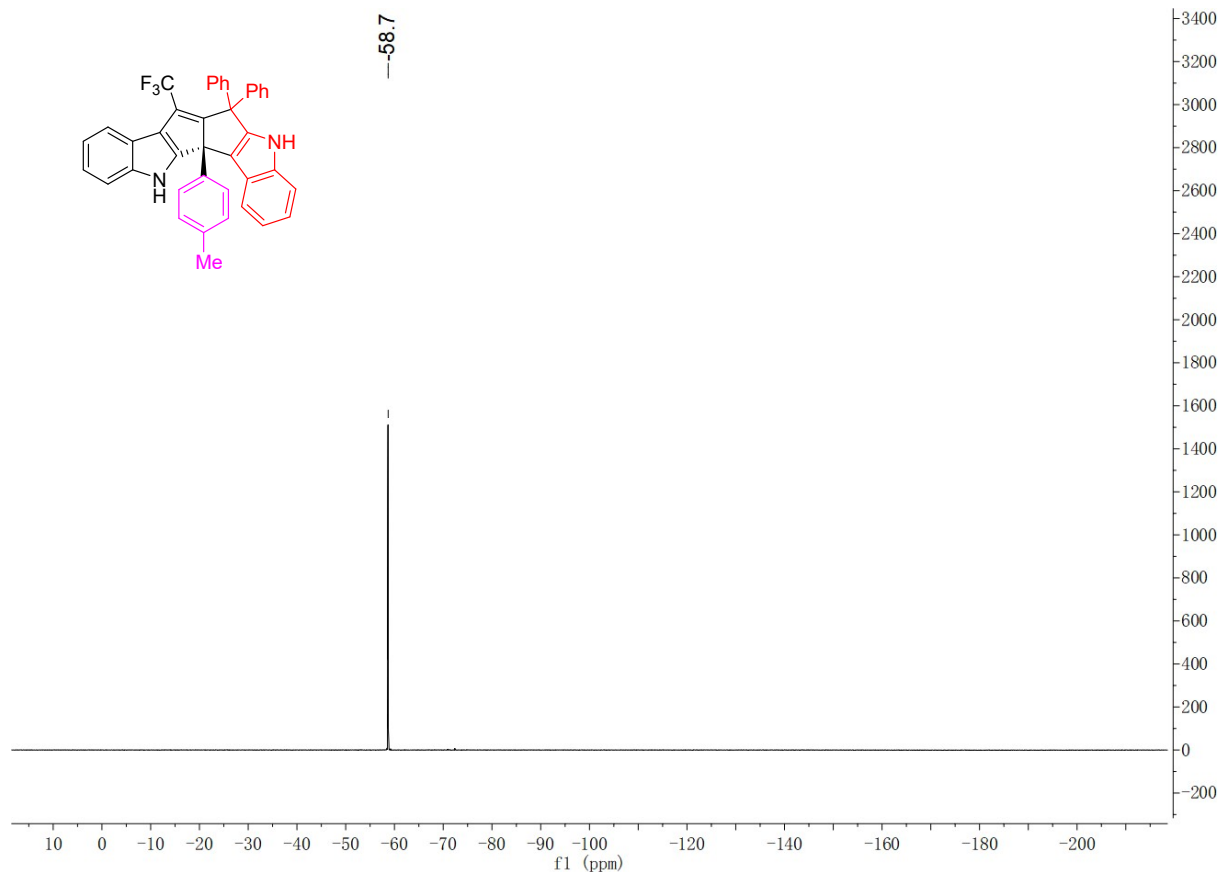

### $^1\text{H}$ NMR of compound 3l (in $\text{CDCl}_3$ )

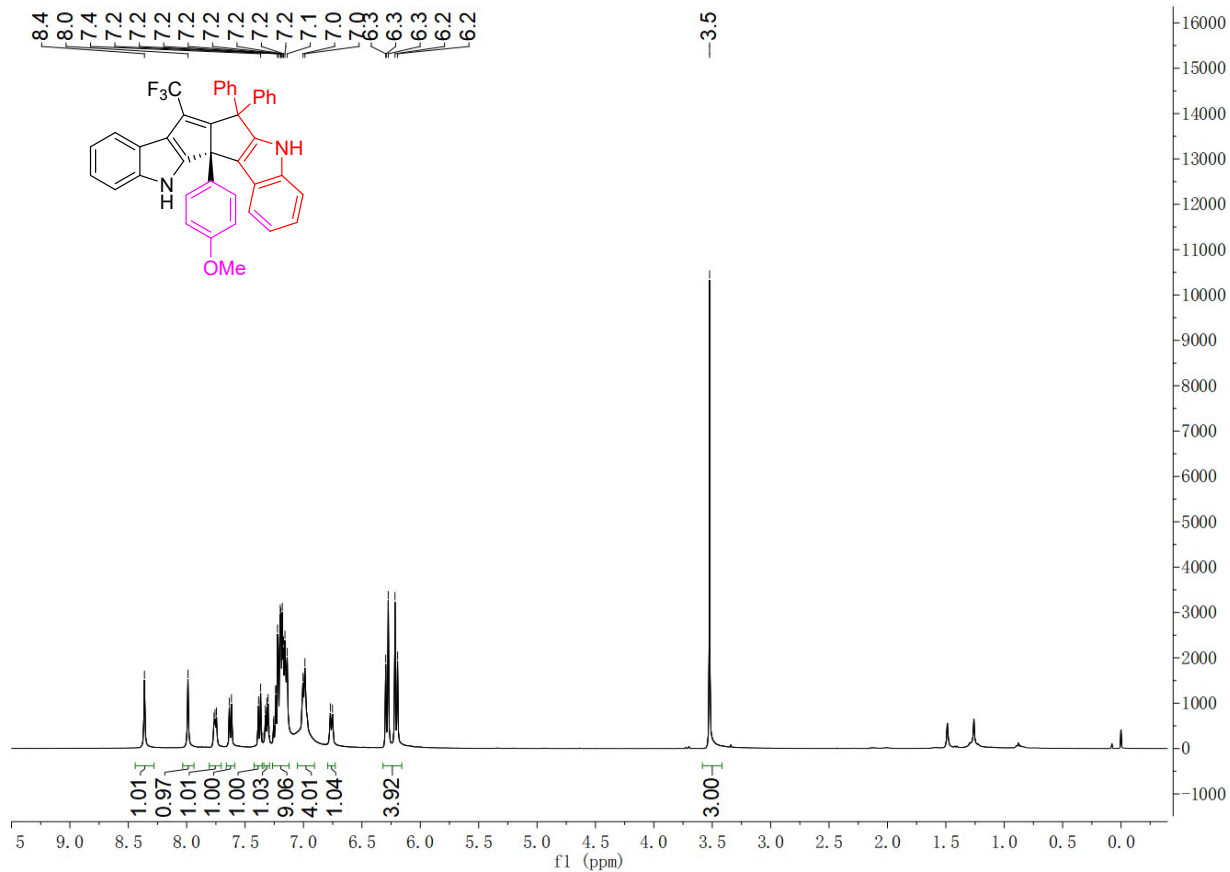

### <sup>13</sup>C NMR of compound 3I (in CDCl<sub>3</sub>)

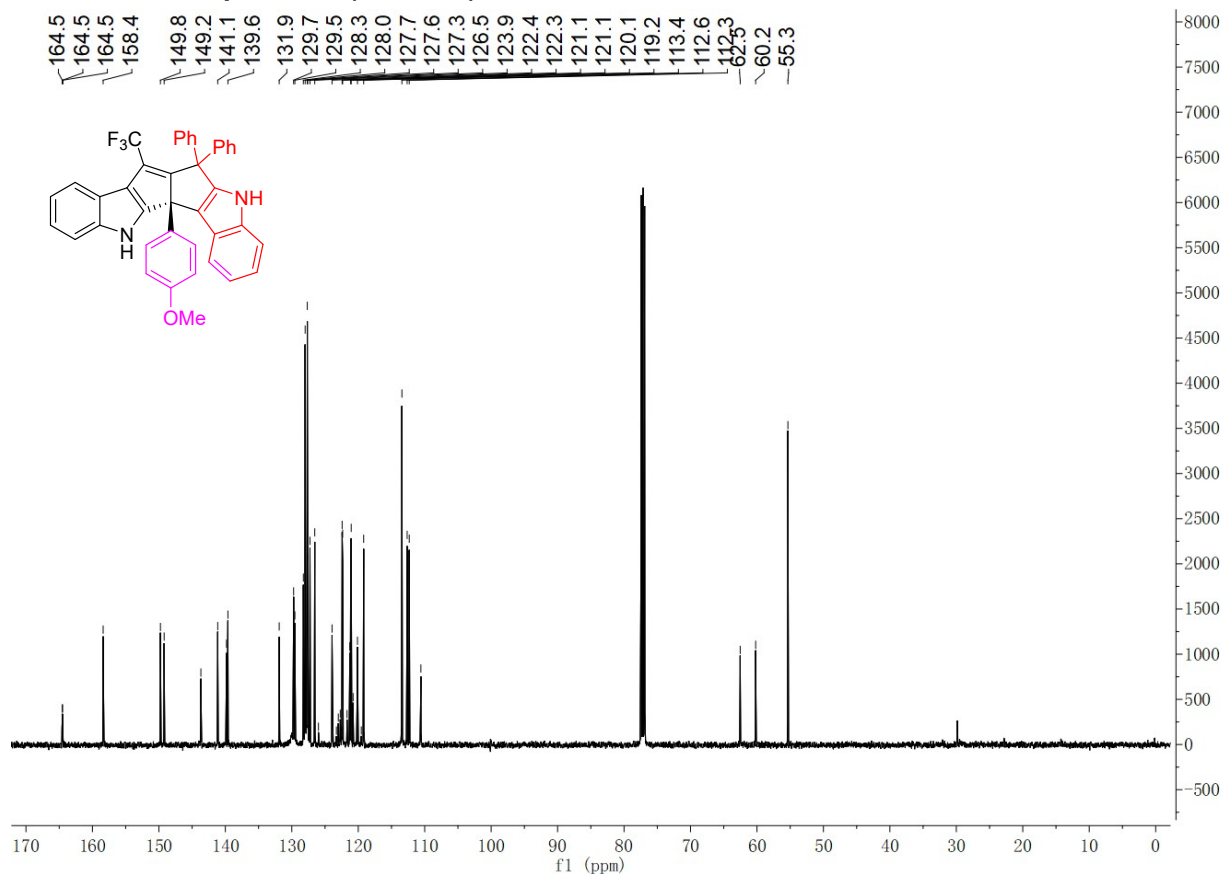

### <sup>19</sup>F NMR of compound 3I (in CDCl<sub>3</sub>)

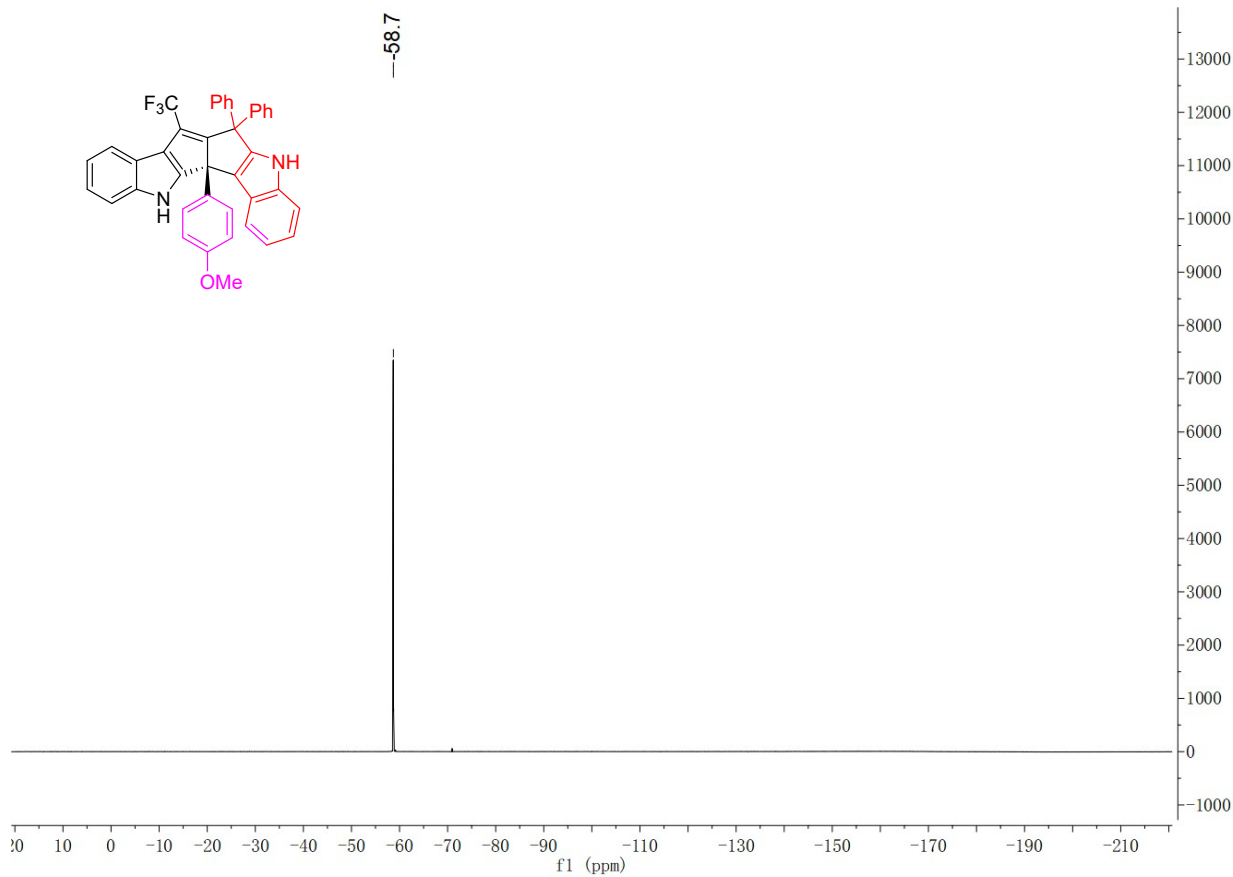



### $^{19}\text{F}$ NMR of compound 3m (in $\text{CDCl}_3$ )

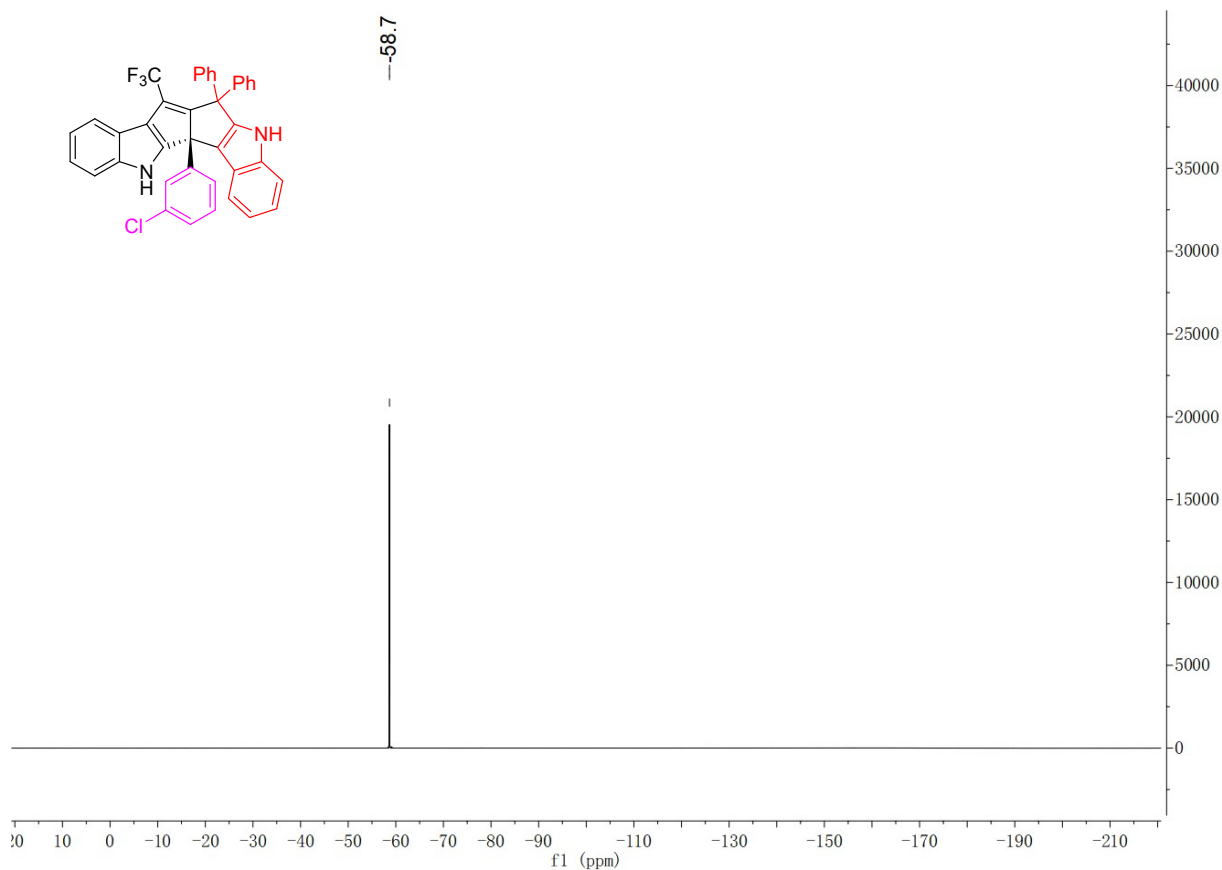

### $^1\text{H}$ NMR of compound 3n (in $\text{CDCl}_3$ )

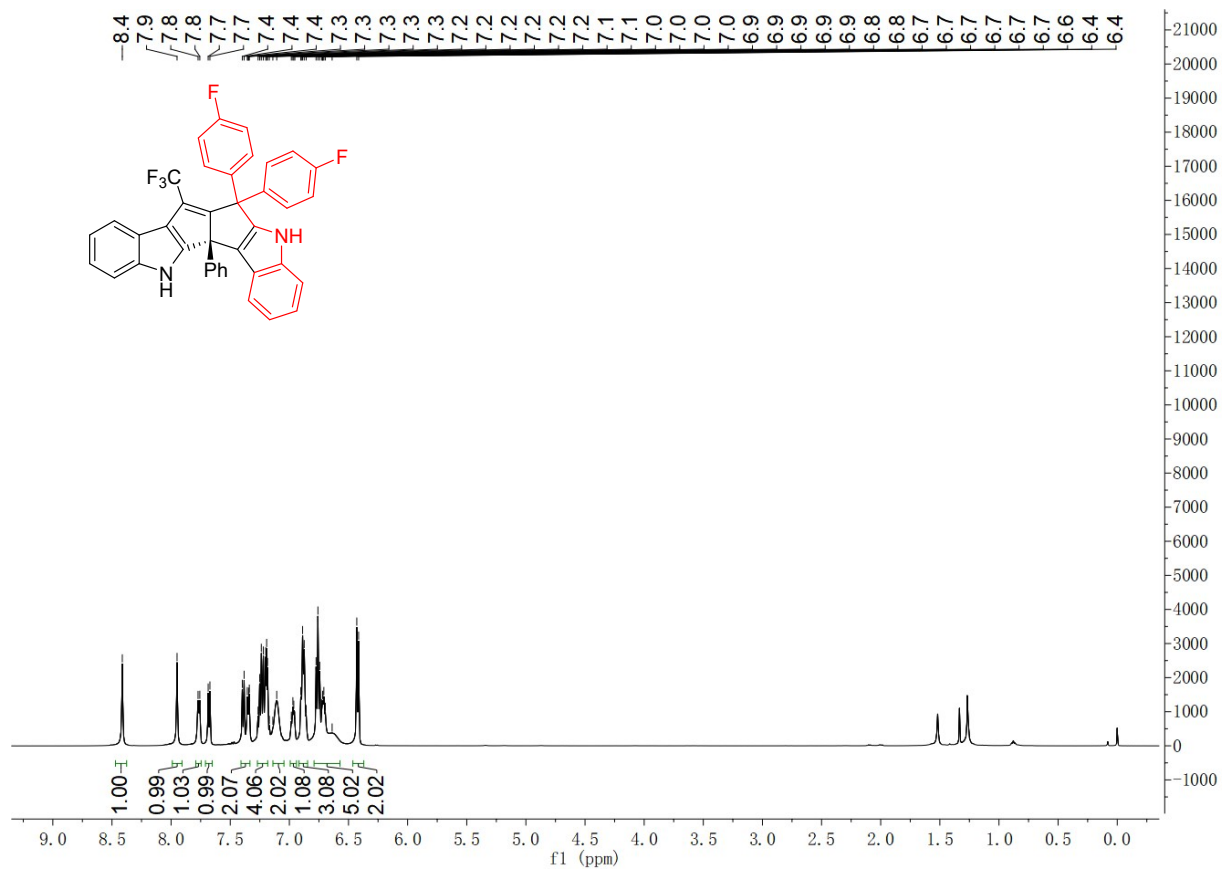

### <sup>13</sup>C NMR of compound 3n (in CDCl<sub>3</sub>)

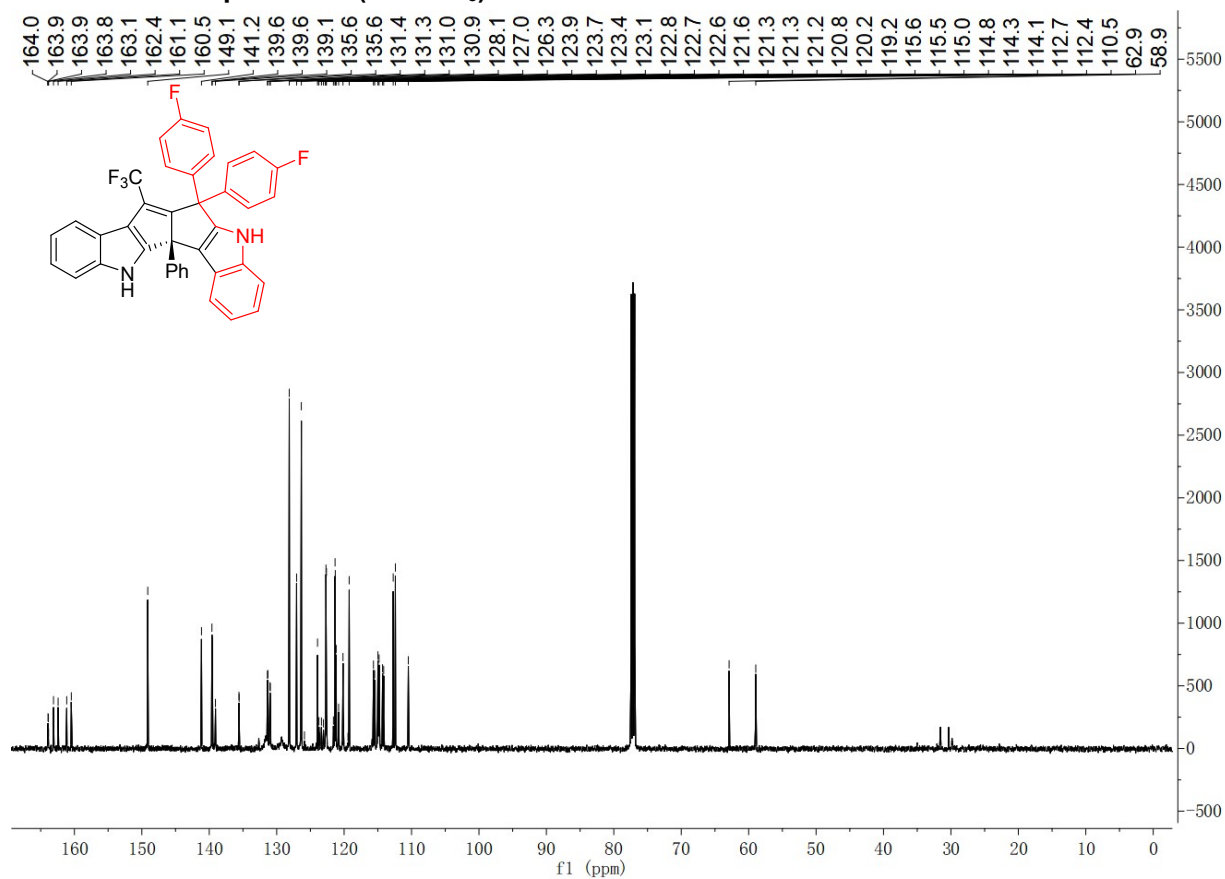

### <sup>19</sup>F NMR of compound 3n (in CDCl<sub>3</sub>)

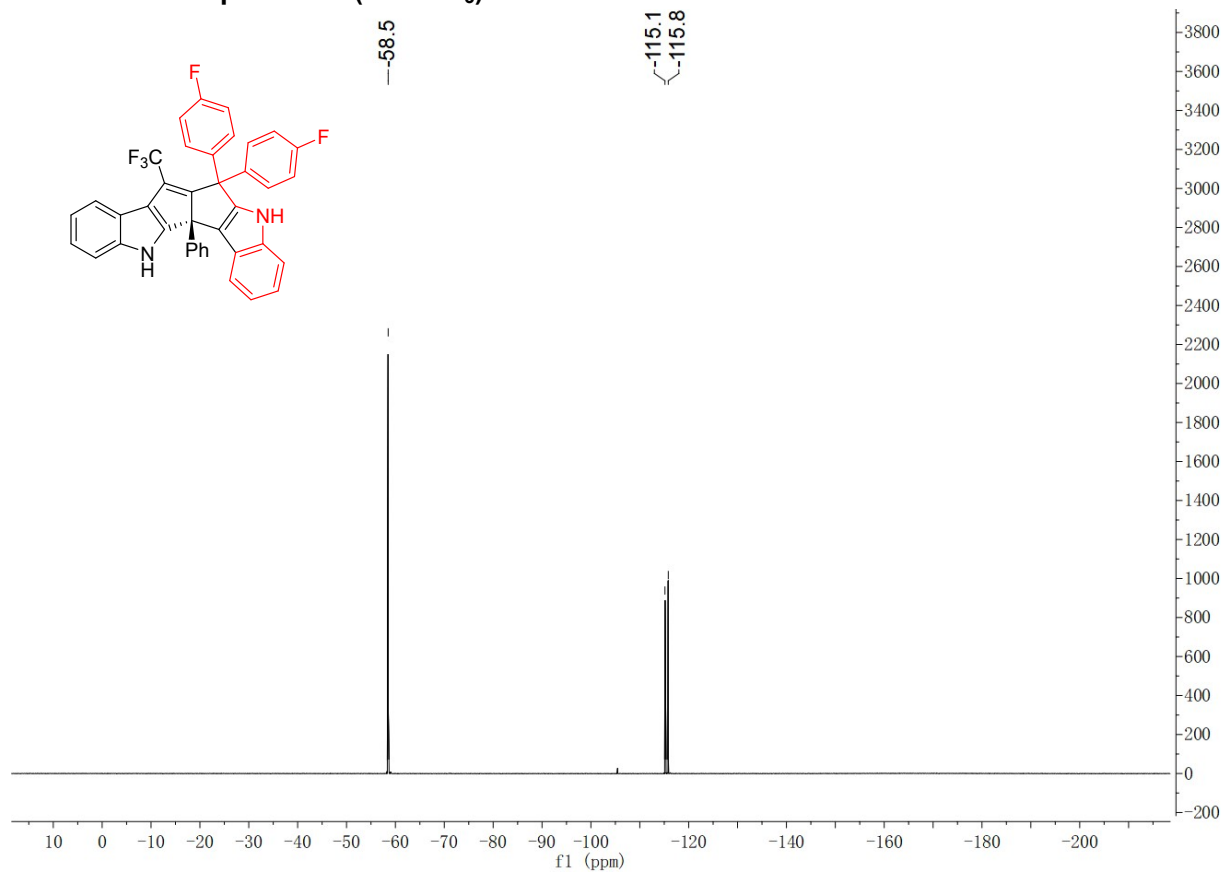

**<sup>1</sup>H NMR of compound 3o (in CDCl<sub>3</sub>)**

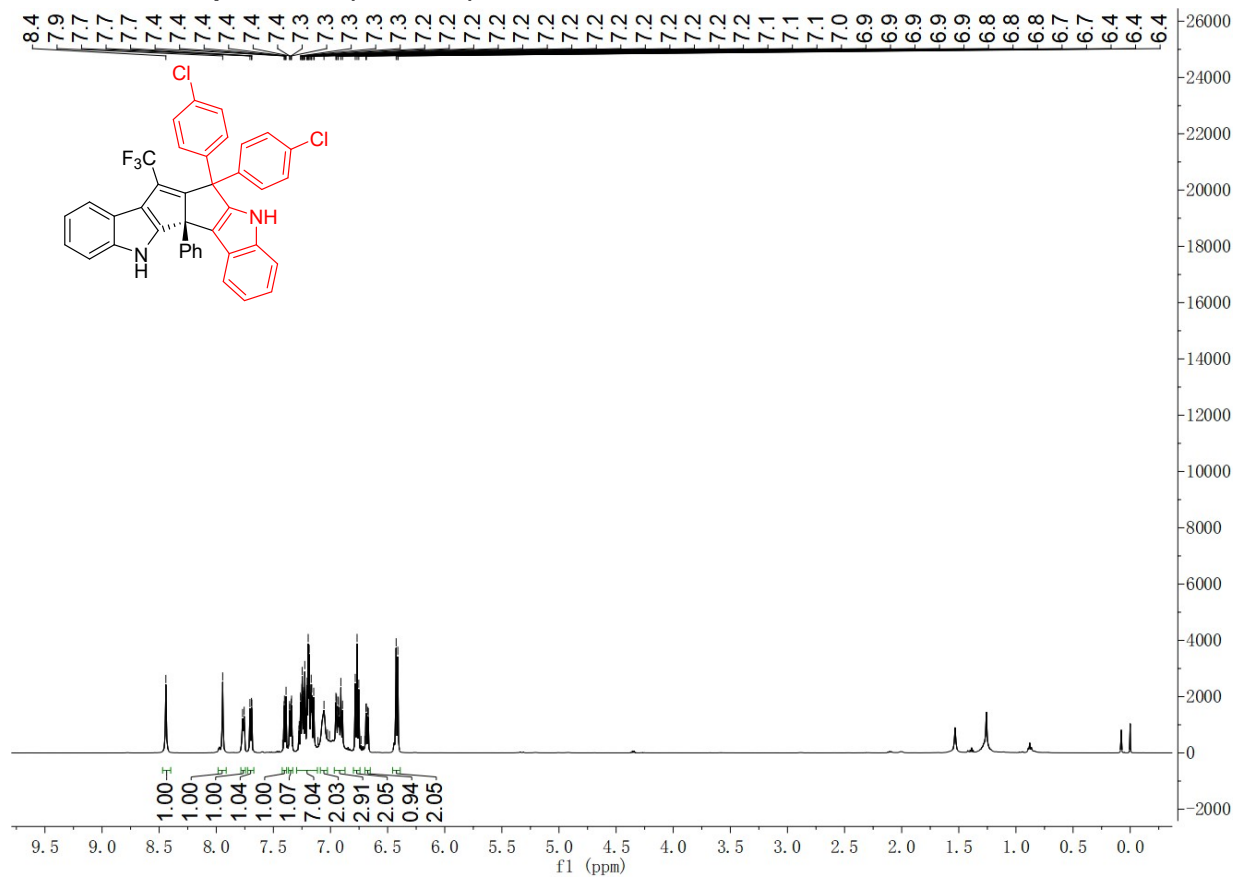

**<sup>13</sup>C NMR of compound 3o (in CDCl<sub>3</sub>)**

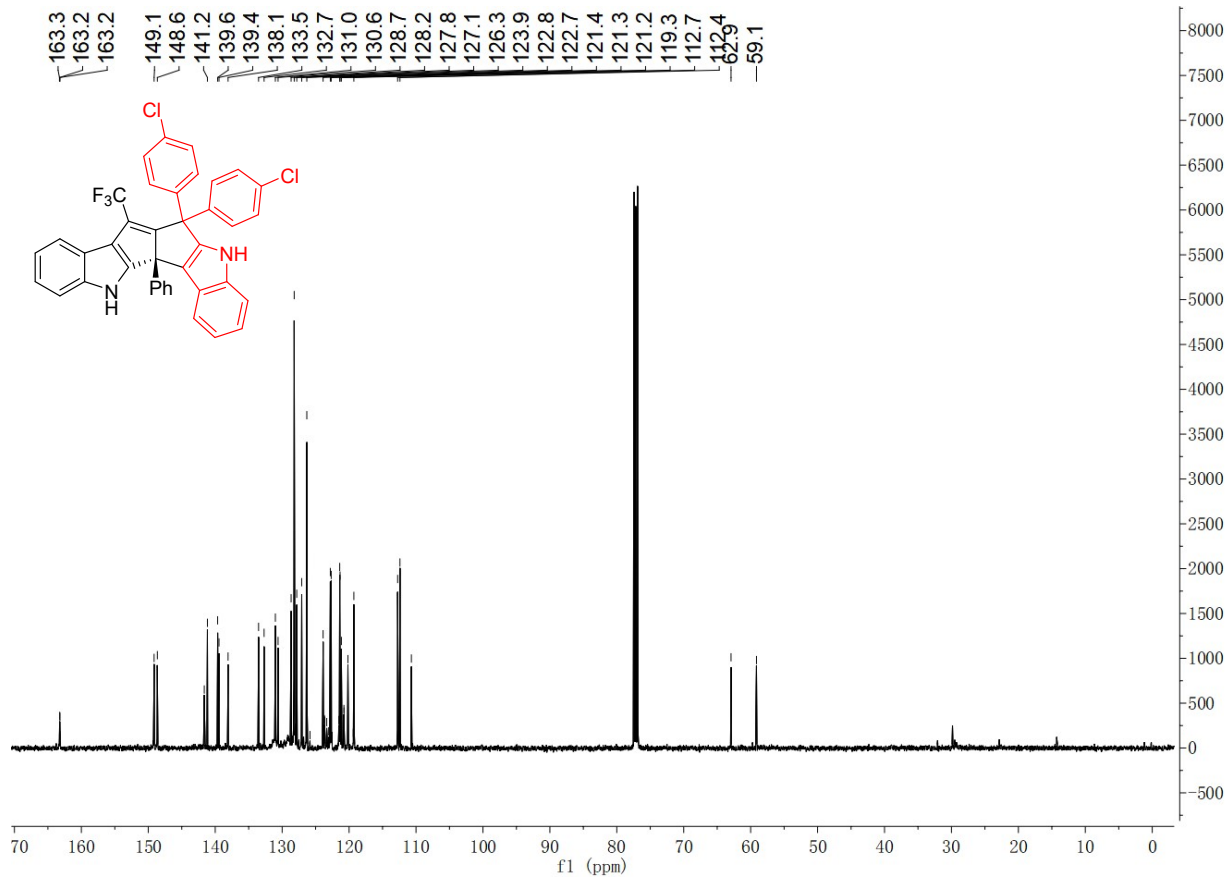



### $^{19}\text{F}$ NMR of compound 3o (in $\text{CDCl}_3$ )

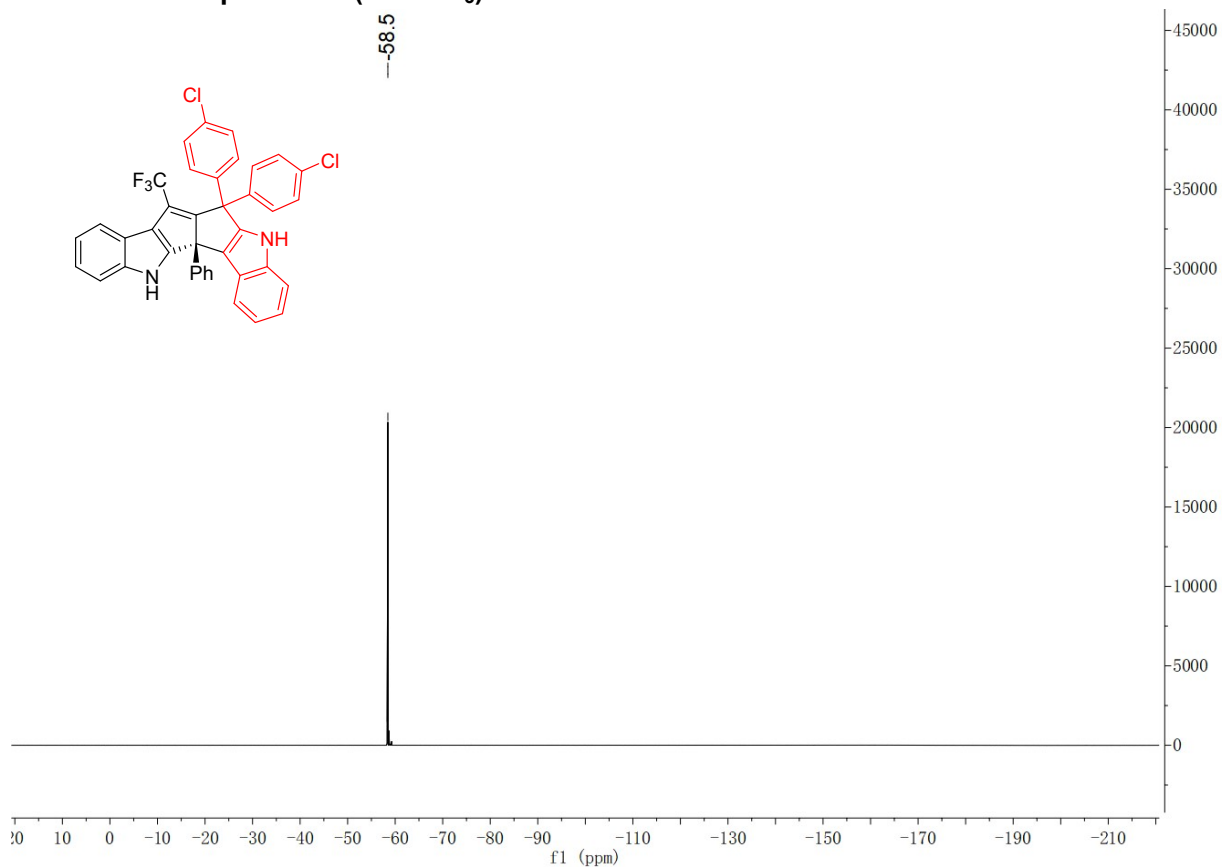

### $^1\text{H}$ NMR of compound 3p (in $\text{CDCl}_3$ )

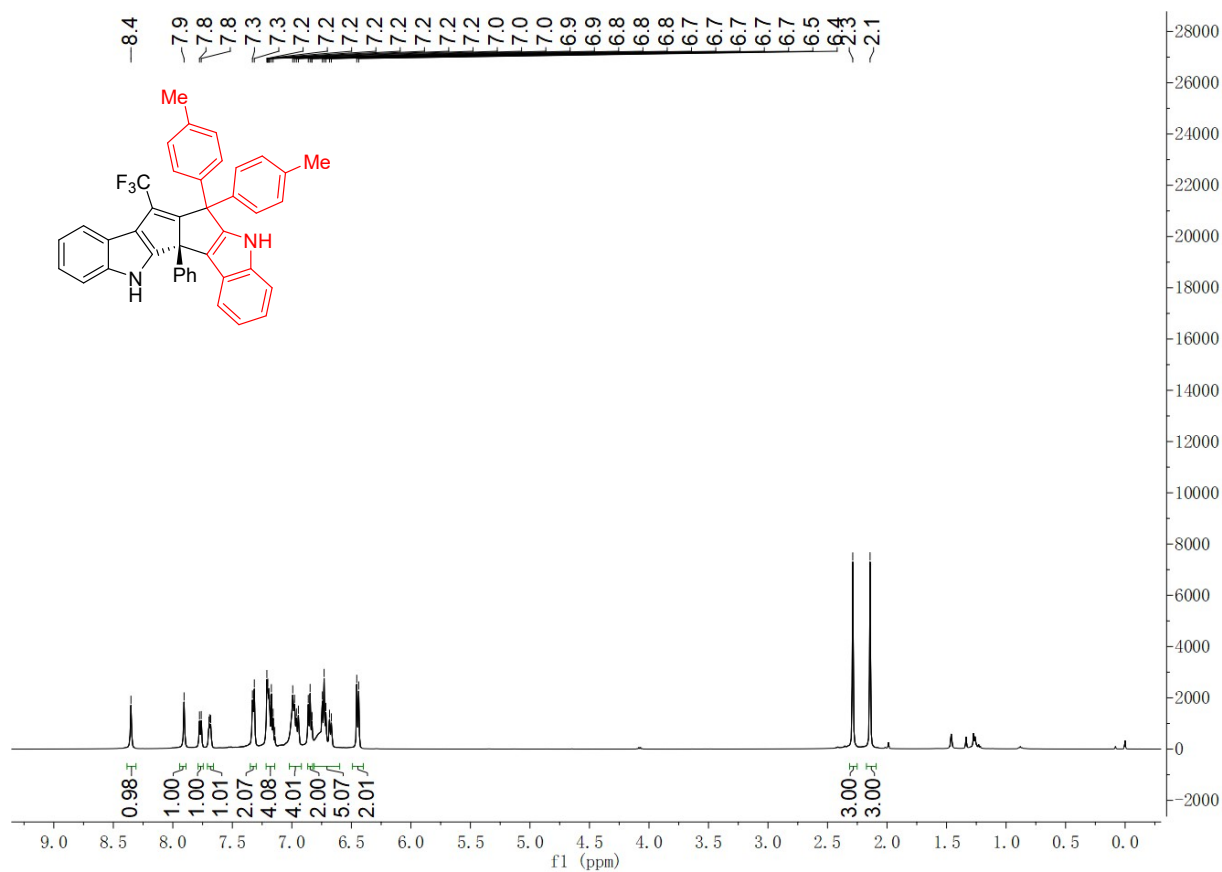

### <sup>13</sup>C NMR of compound 3p (in CDCl<sub>3</sub>)

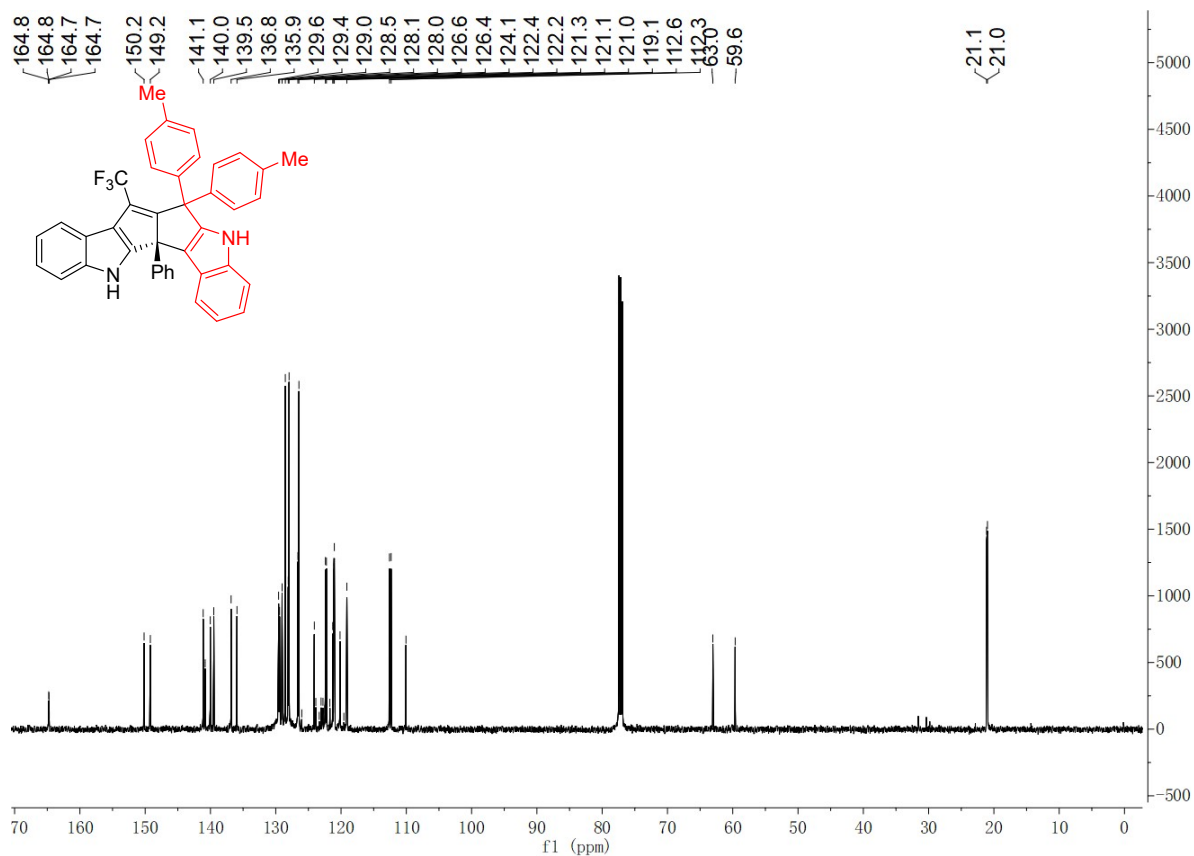

### <sup>19</sup>F NMR of compound 3p (in CDCl<sub>3</sub>)

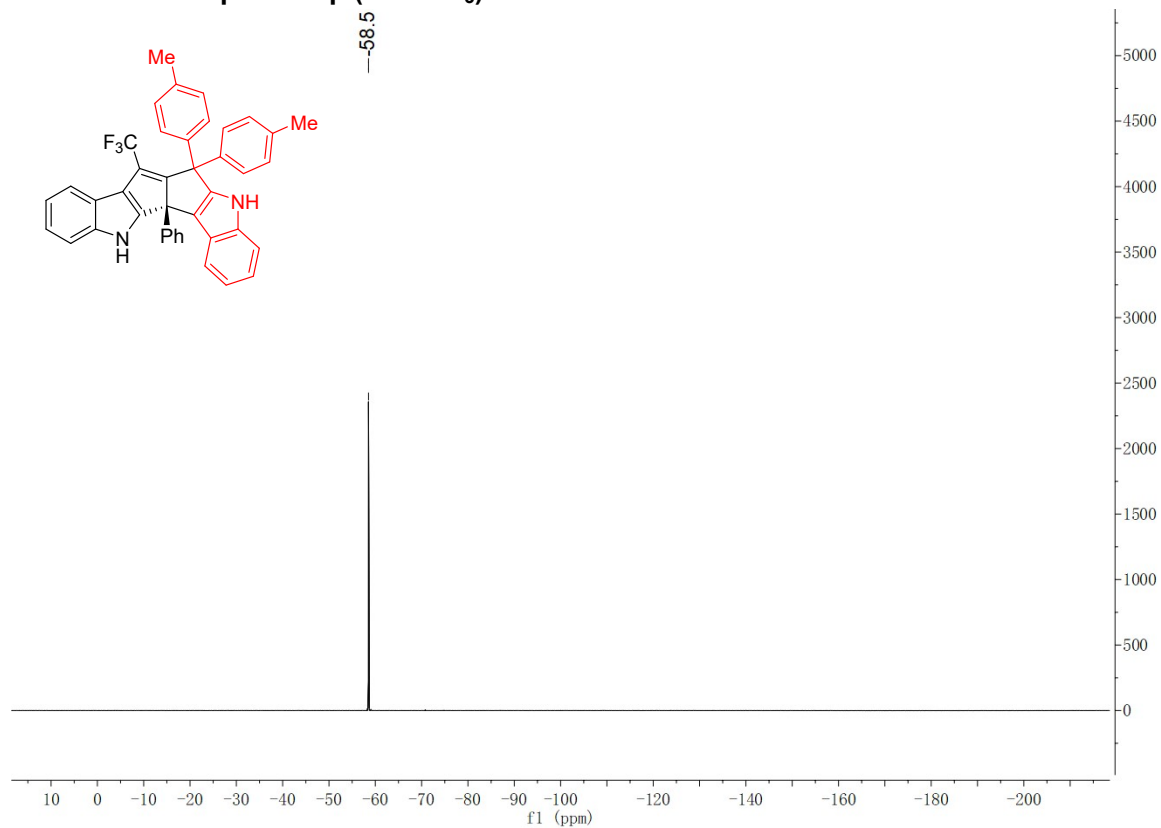

### <sup>1</sup>H NMR of compound 3q (in CDCl<sub>3</sub>)

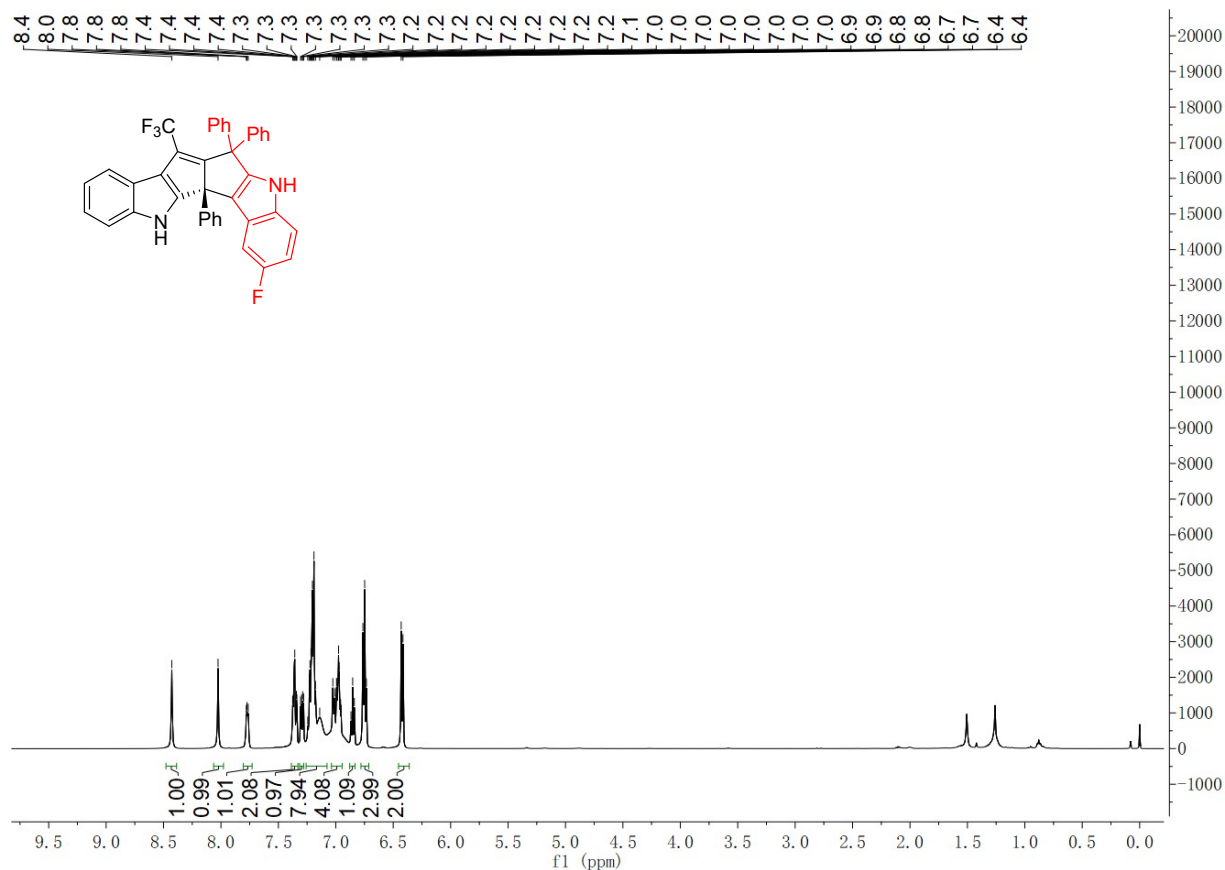

### <sup>13</sup>C NMR of compound 3q (in CDCl<sub>3</sub>)

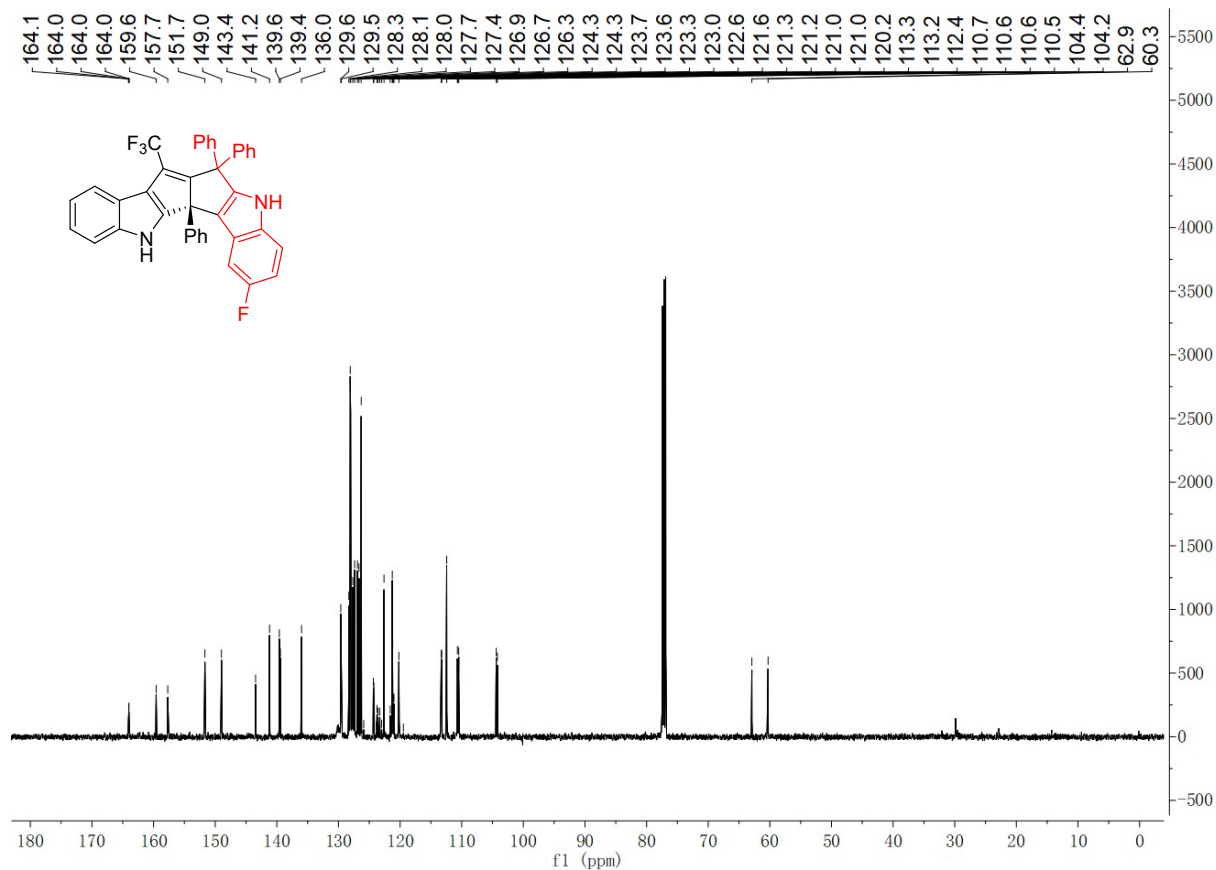

### $^{19}\text{F}$ NMR of compound 3q (in $\text{CDCl}_3$ )

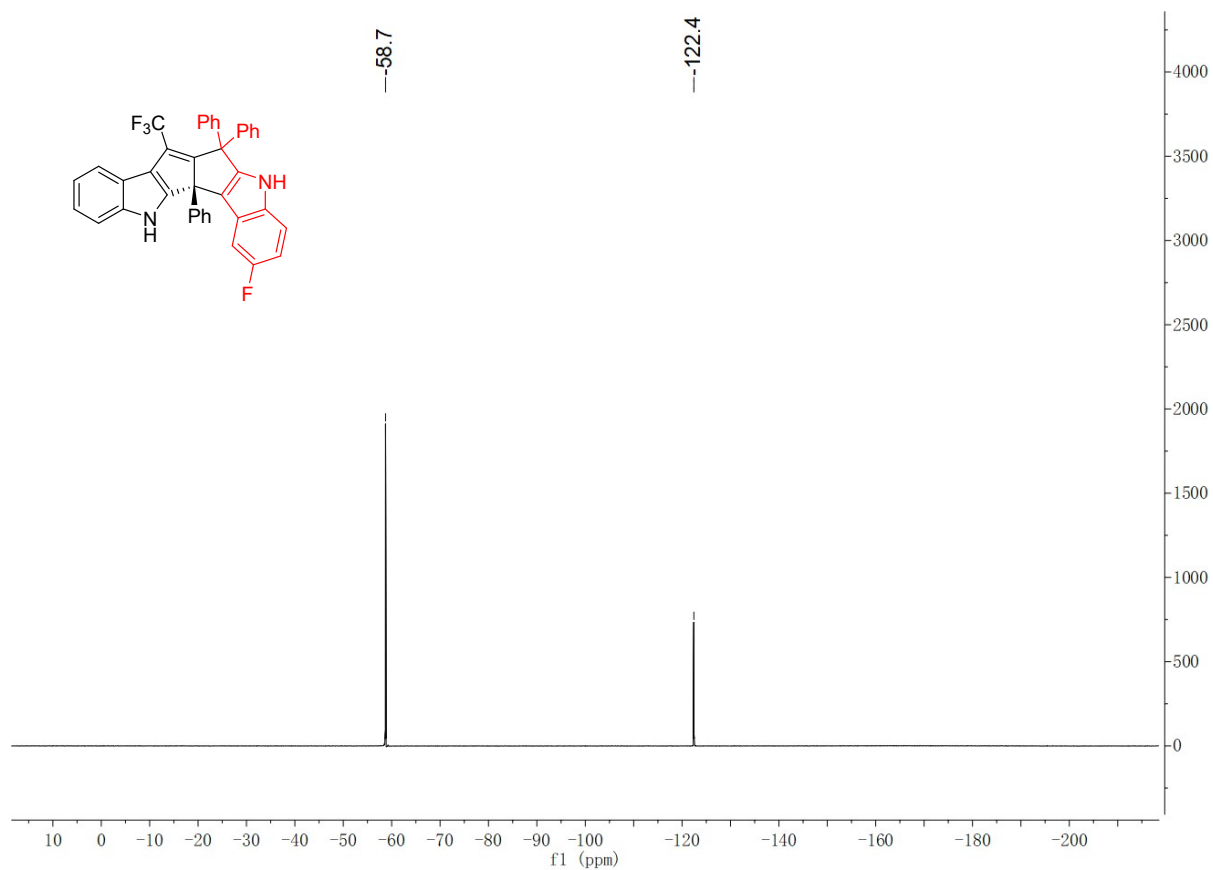

### $^1\text{H}$ NMR of compound 3r (in $\text{CDCl}_3$ )

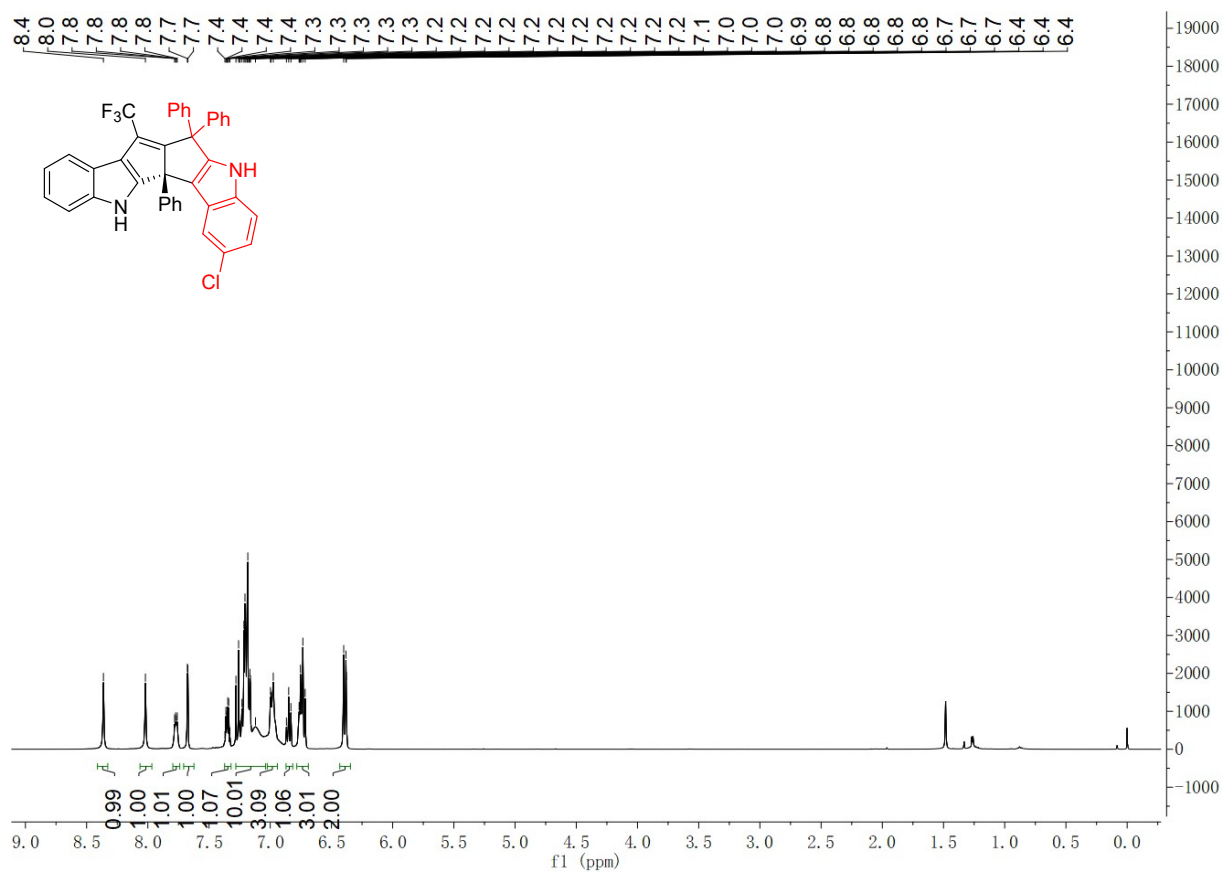

**<sup>13</sup>C NMR of compound 3r (in CDCl<sub>3</sub>)**

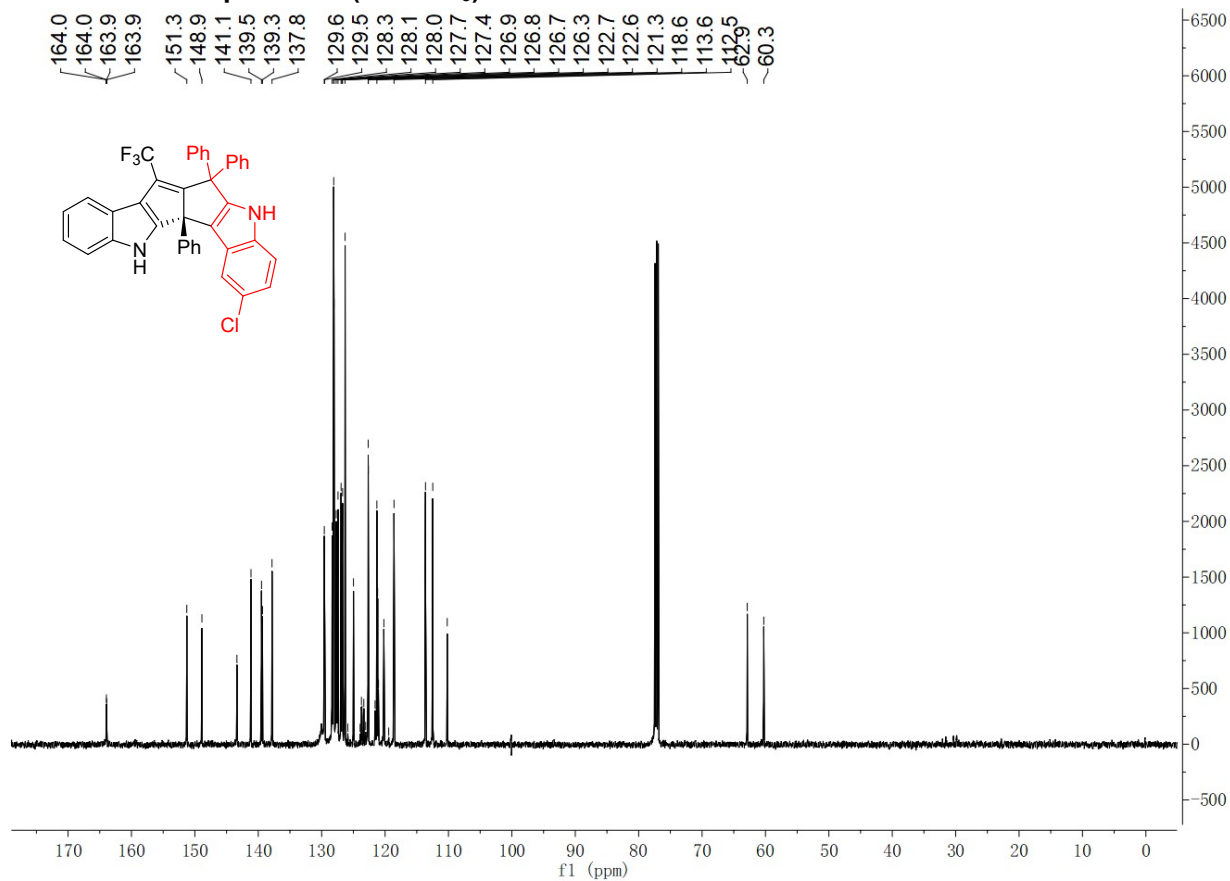

**<sup>19</sup>F NMR of compound 3r (in CDCl<sub>3</sub>)**

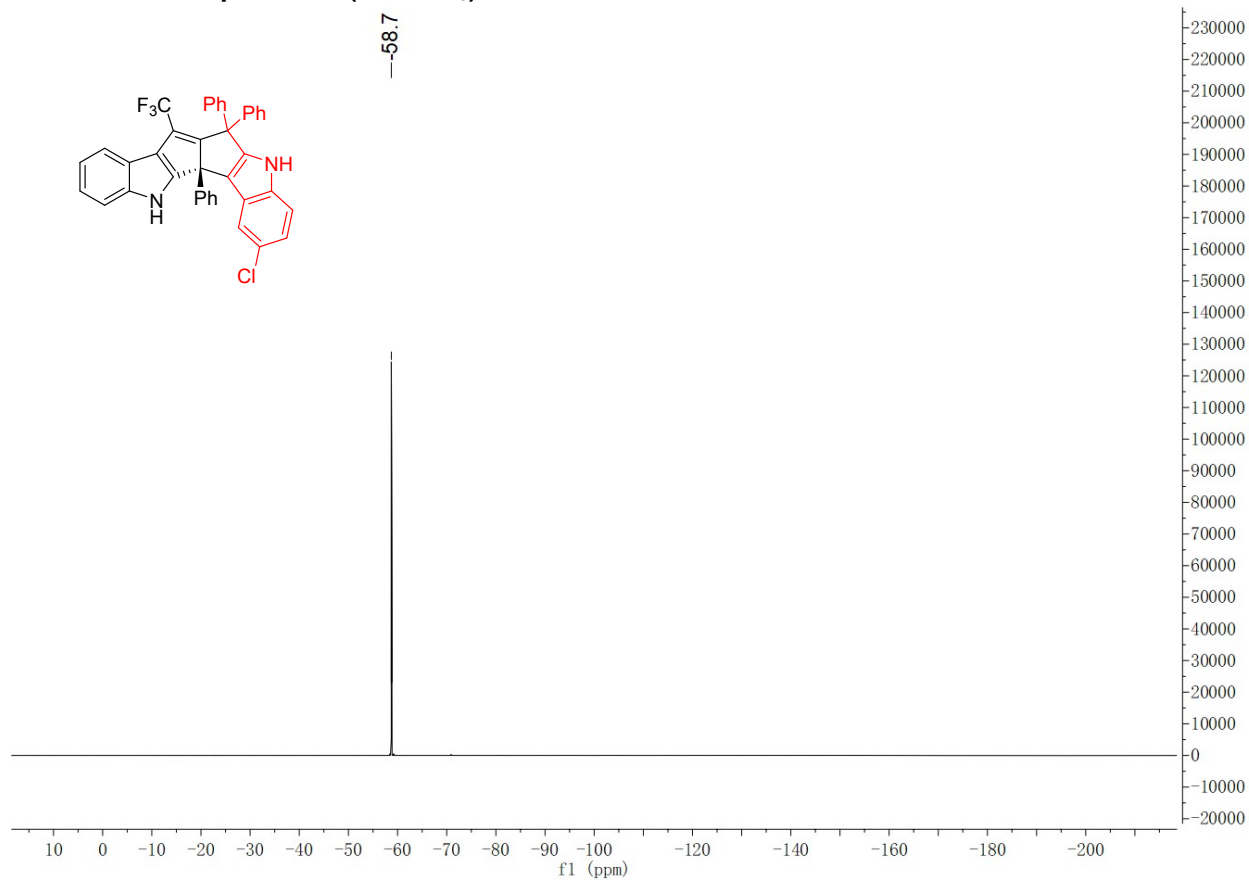

### <sup>1</sup>H NMR of compound 3s (in CDCl<sub>3</sub>)

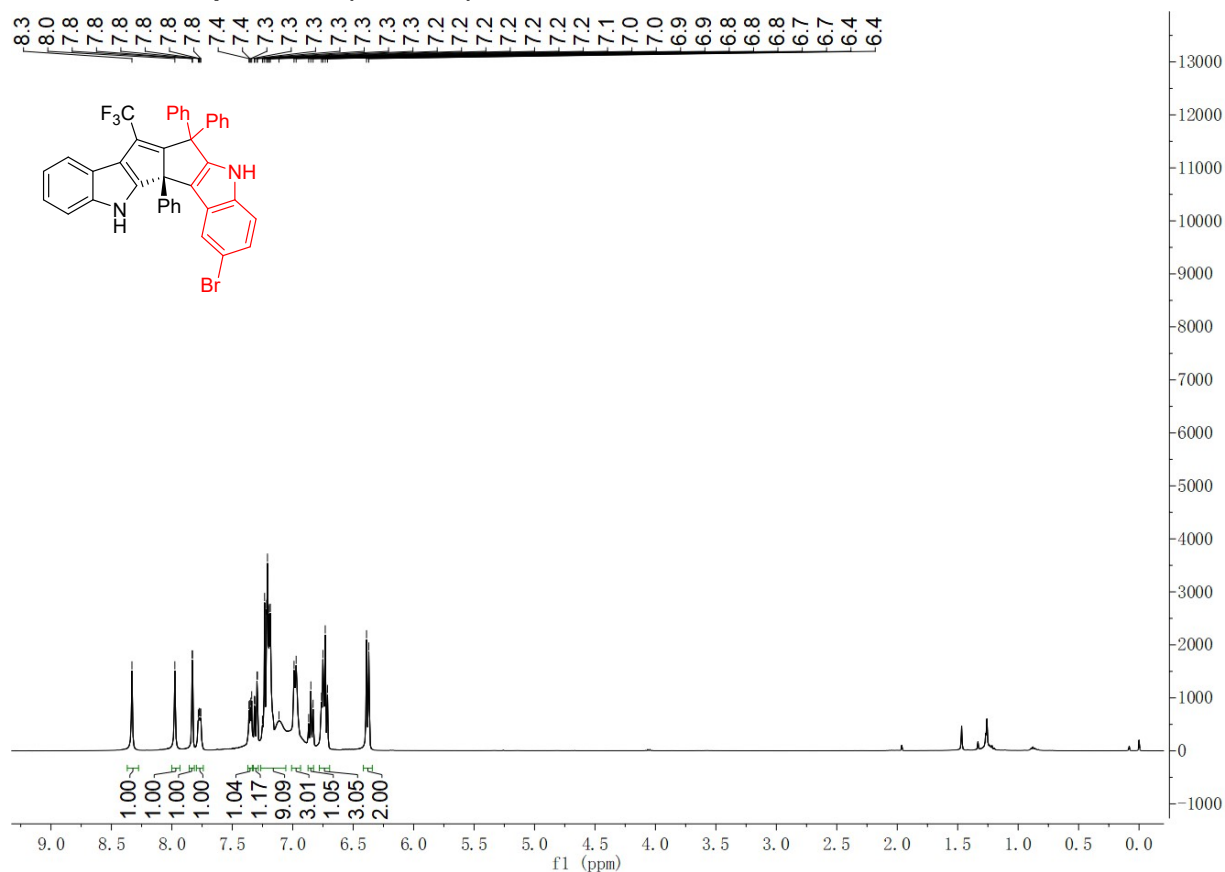

### <sup>13</sup>C NMR of compound 3s (in CDCl<sub>3</sub>)

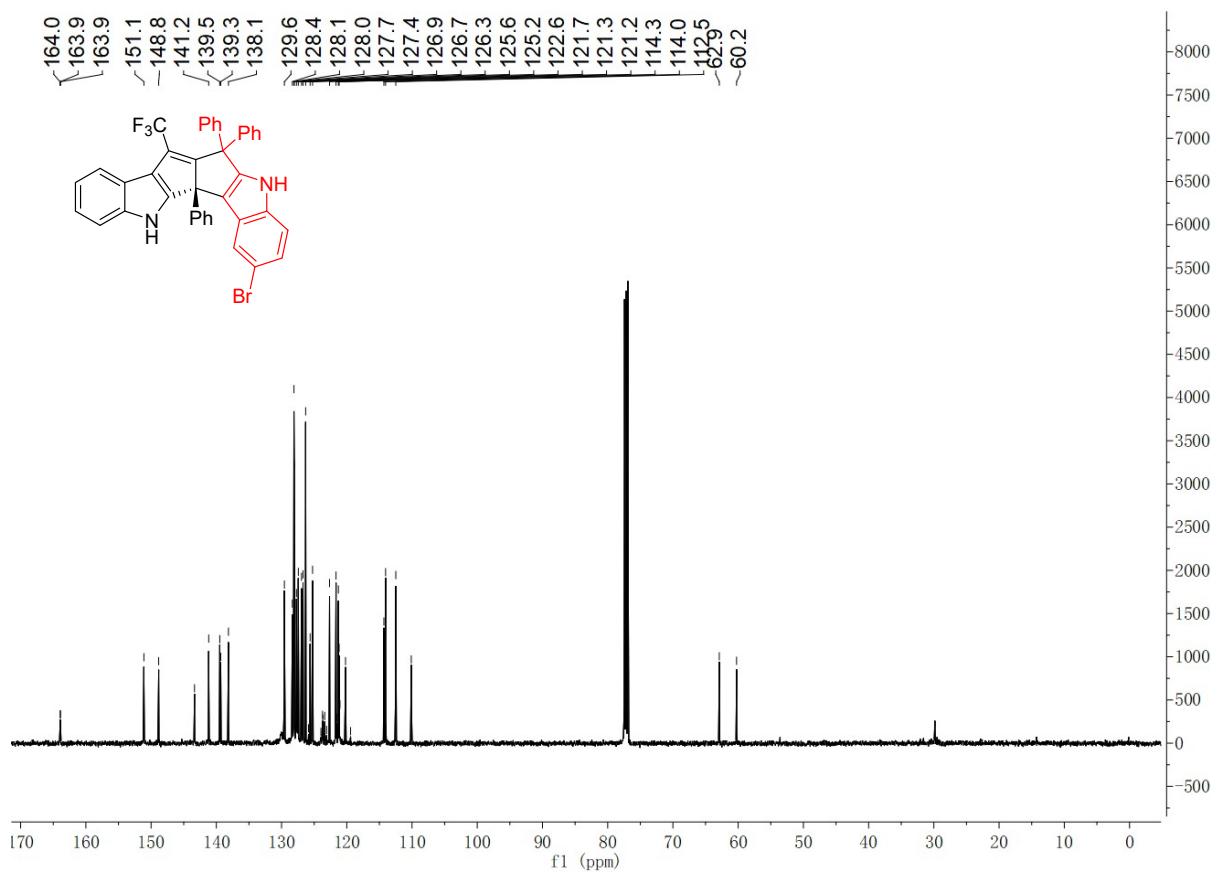

### $^{19}\text{F}$ NMR of compound 3s (in $\text{CDCl}_3$ )

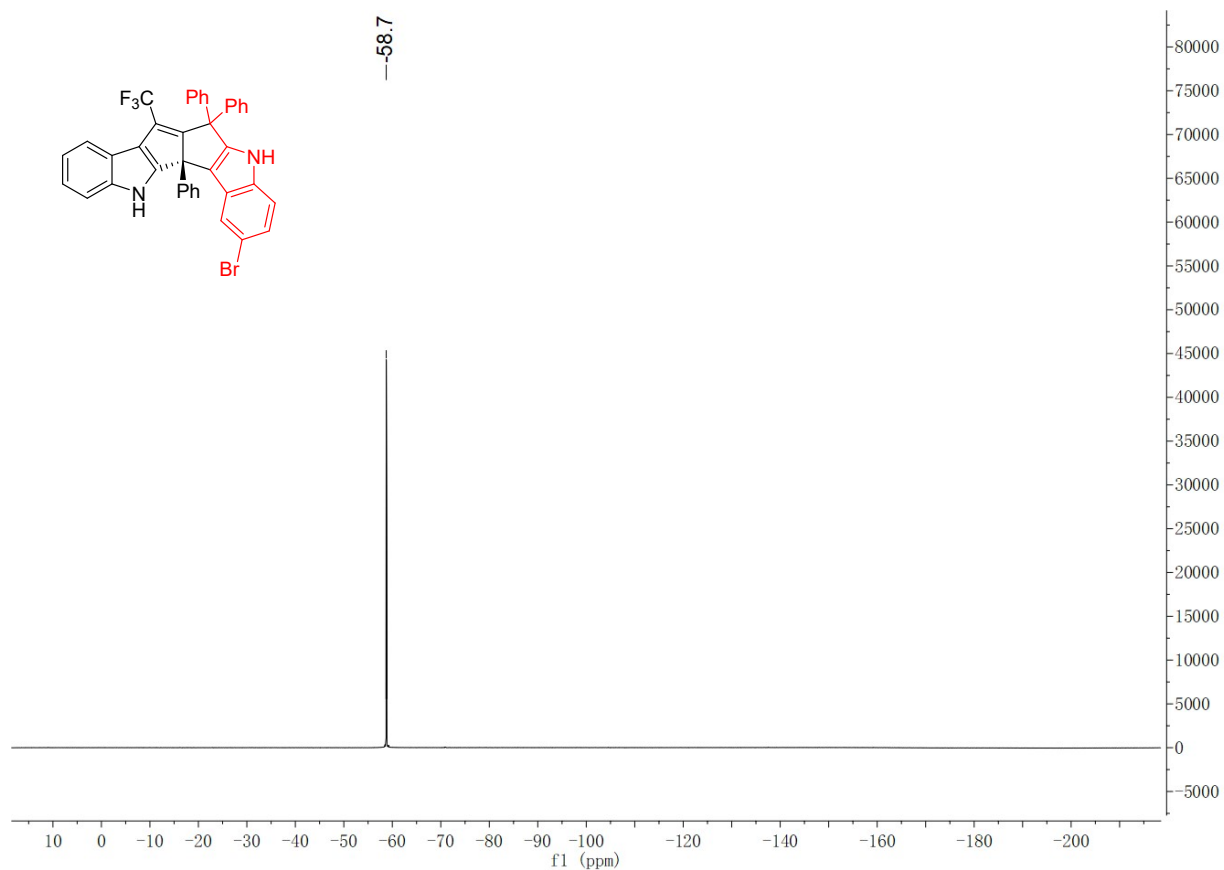

### $^1\text{H}$ NMR of compound 3t (in $\text{CDCl}_3$ )

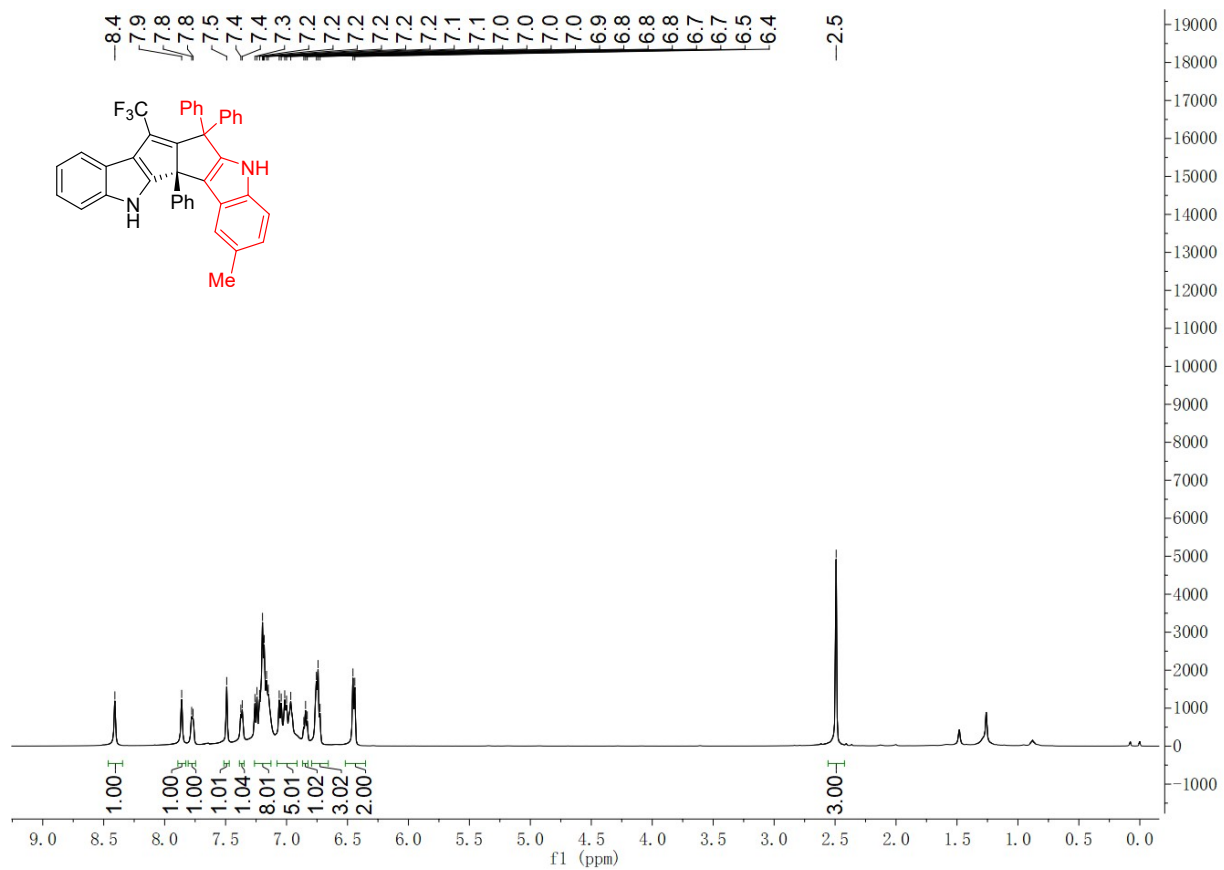

### <sup>13</sup>C NMR of compound 3t (in CDCl<sub>3</sub>)

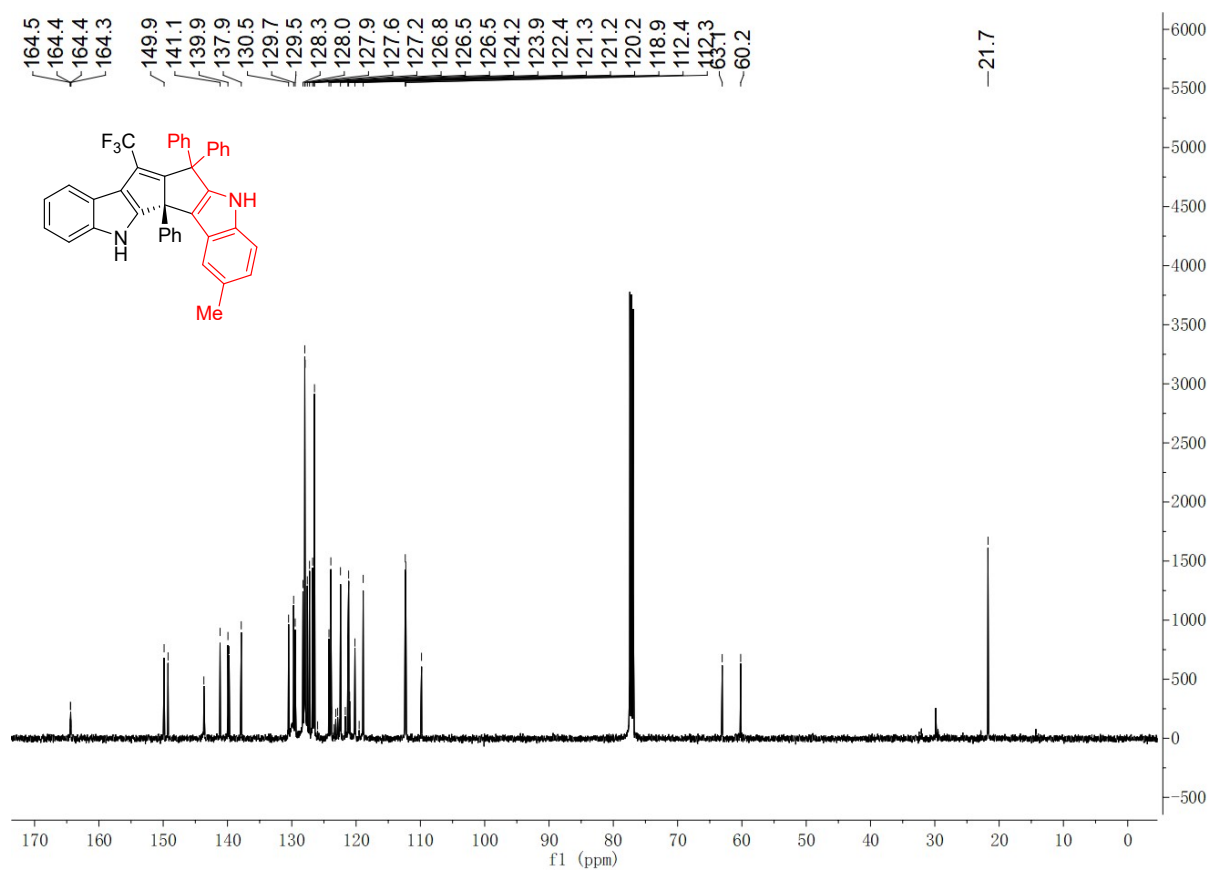

### <sup>19</sup>F NMR of compound 3t (in CDCl<sub>3</sub>)

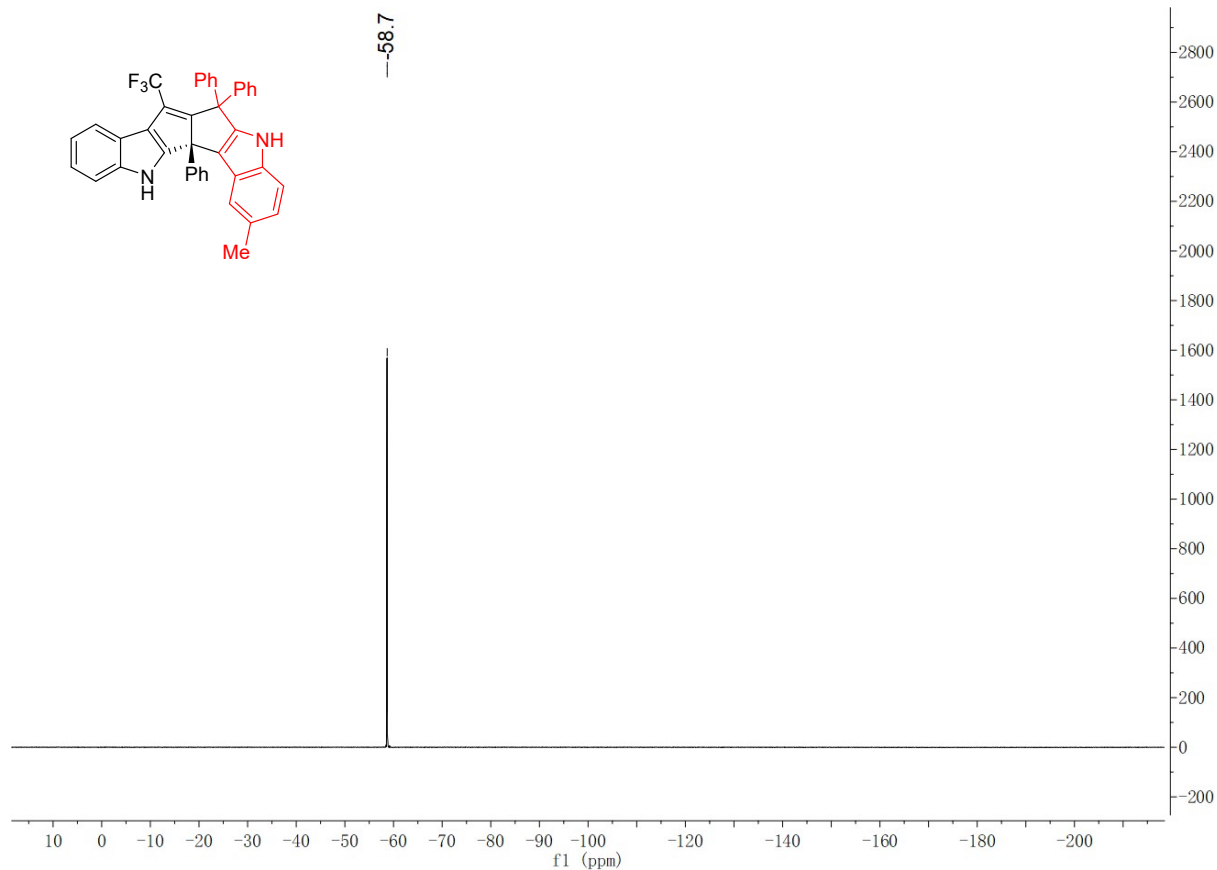



### <sup>1</sup>H NMR of compound 3u (in CDCl<sub>3</sub>)

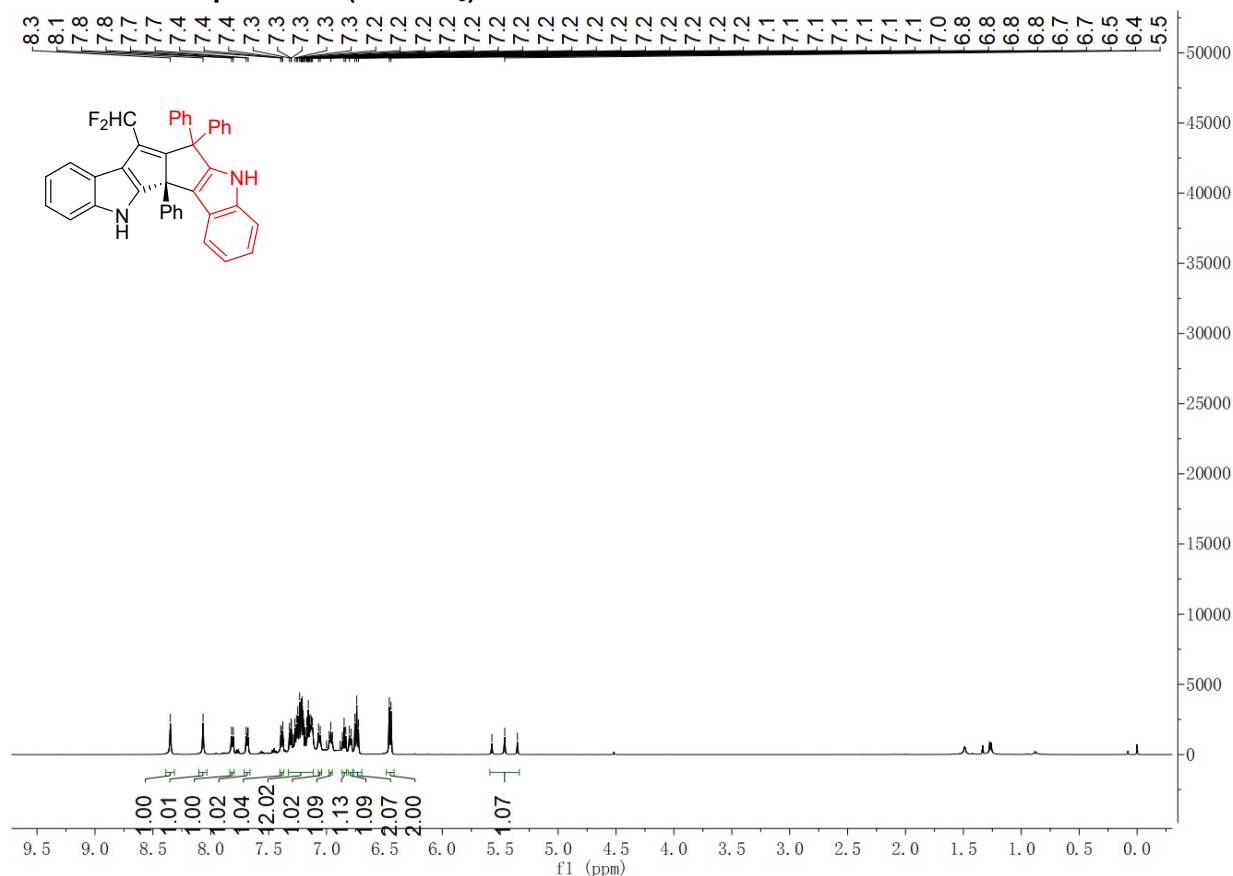

### <sup>13</sup>C NMR of compound 3u (in CDCl<sub>3</sub>)

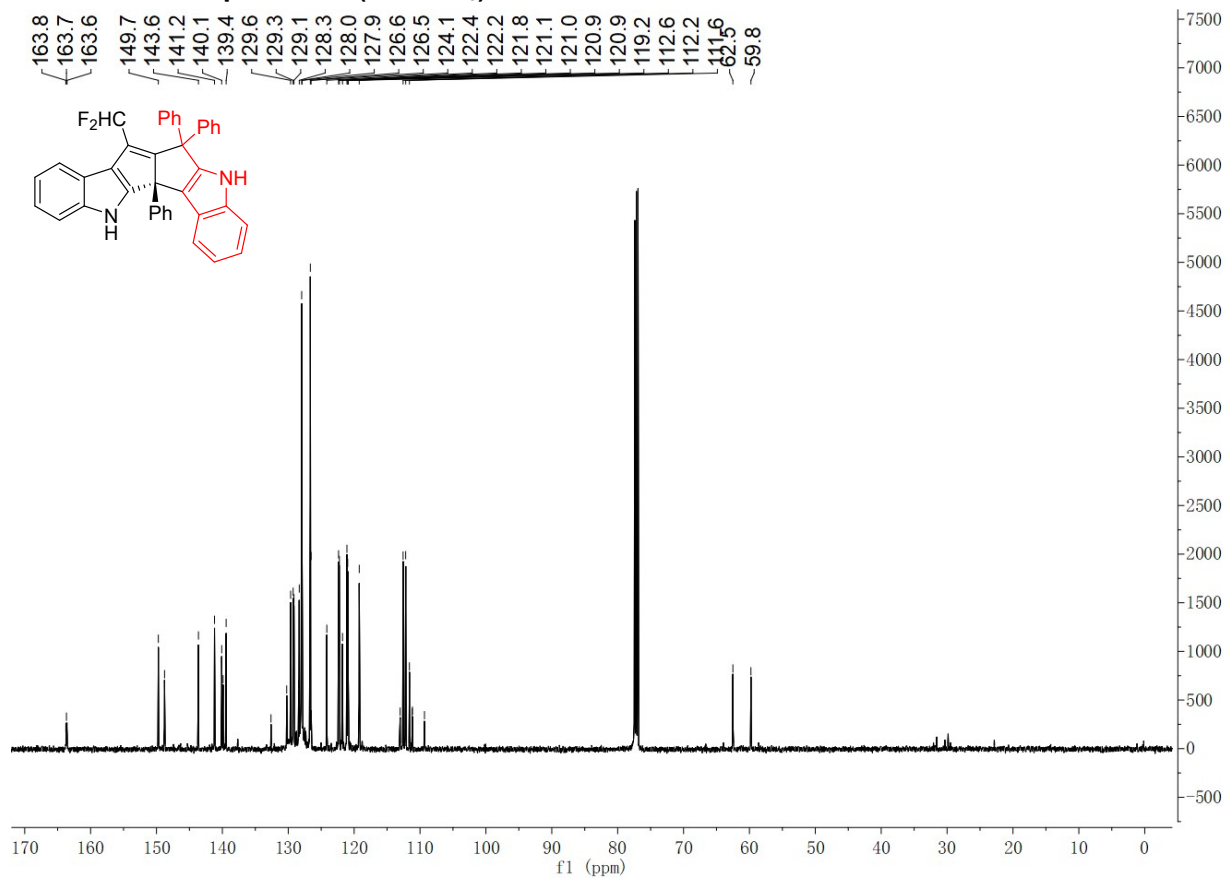

### $^{19}\text{F}$ NMR of compound 3u (in $\text{CDCl}_3$ )

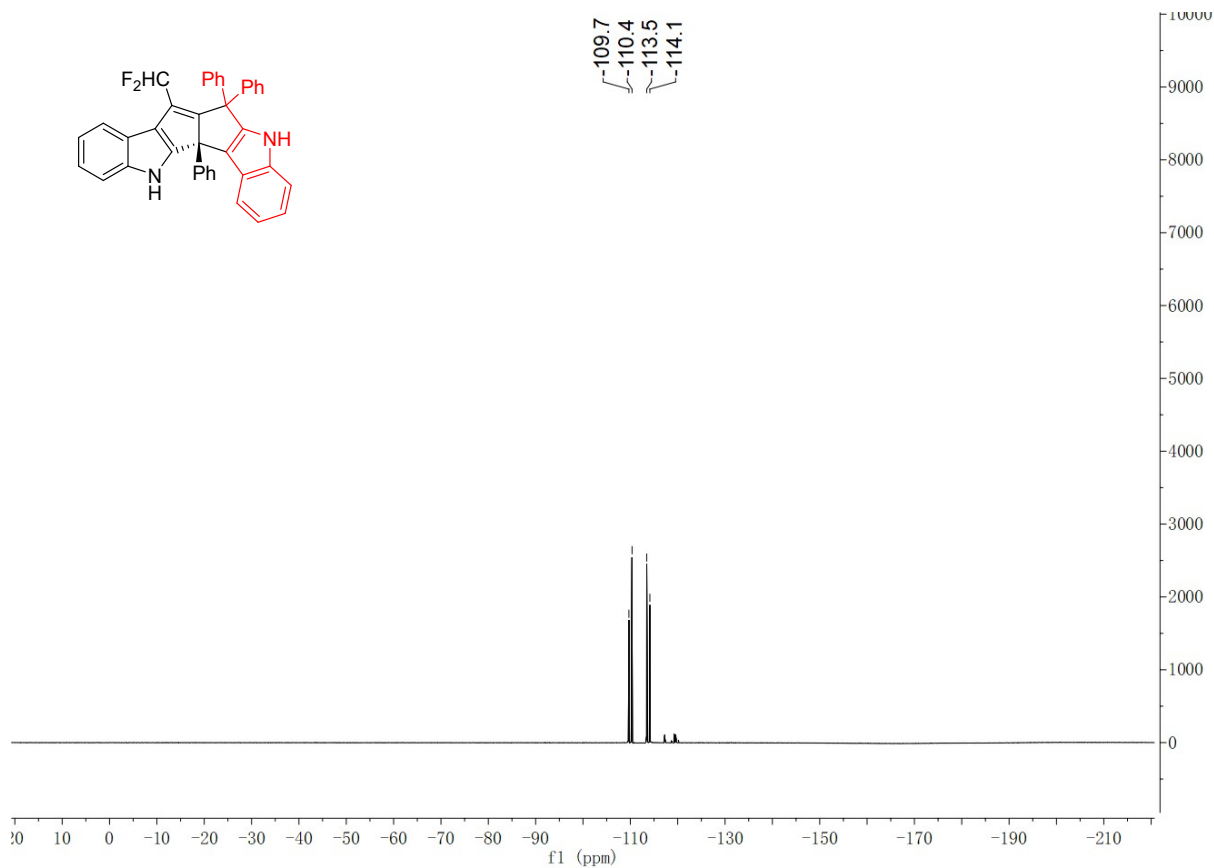

### $^1\text{H}$ NMR of compound 3v (in $\text{CDCl}_3$ )

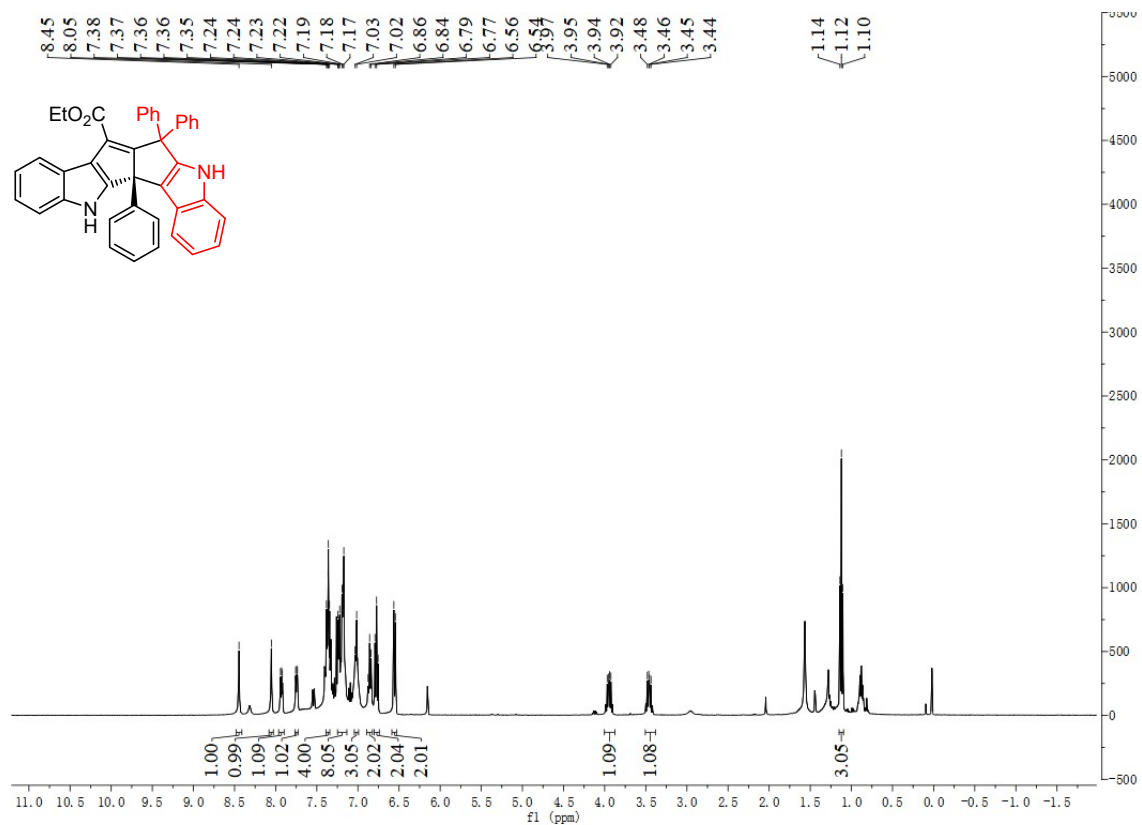

**<sup>13</sup>C NMR of compound 3v (in CDCl<sub>3</sub>)**

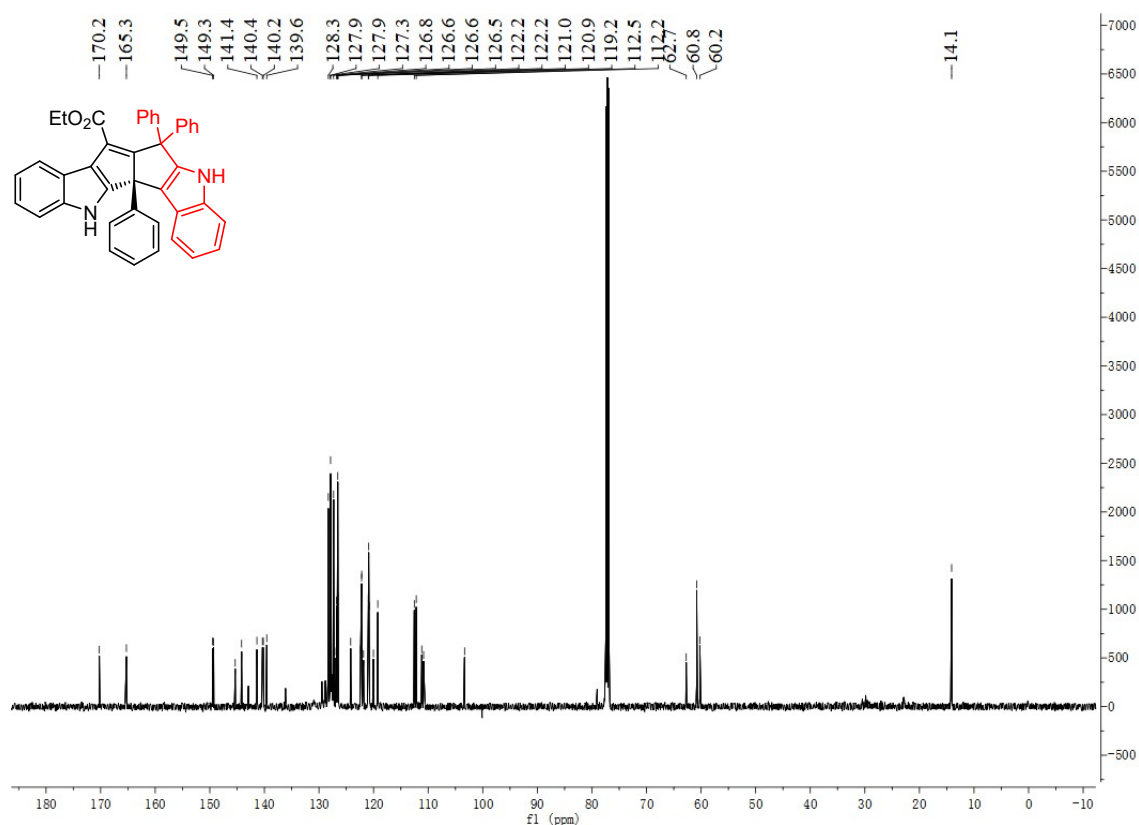

**<sup>1</sup>H NMR of compound 3w (in CDCl<sub>3</sub>)**

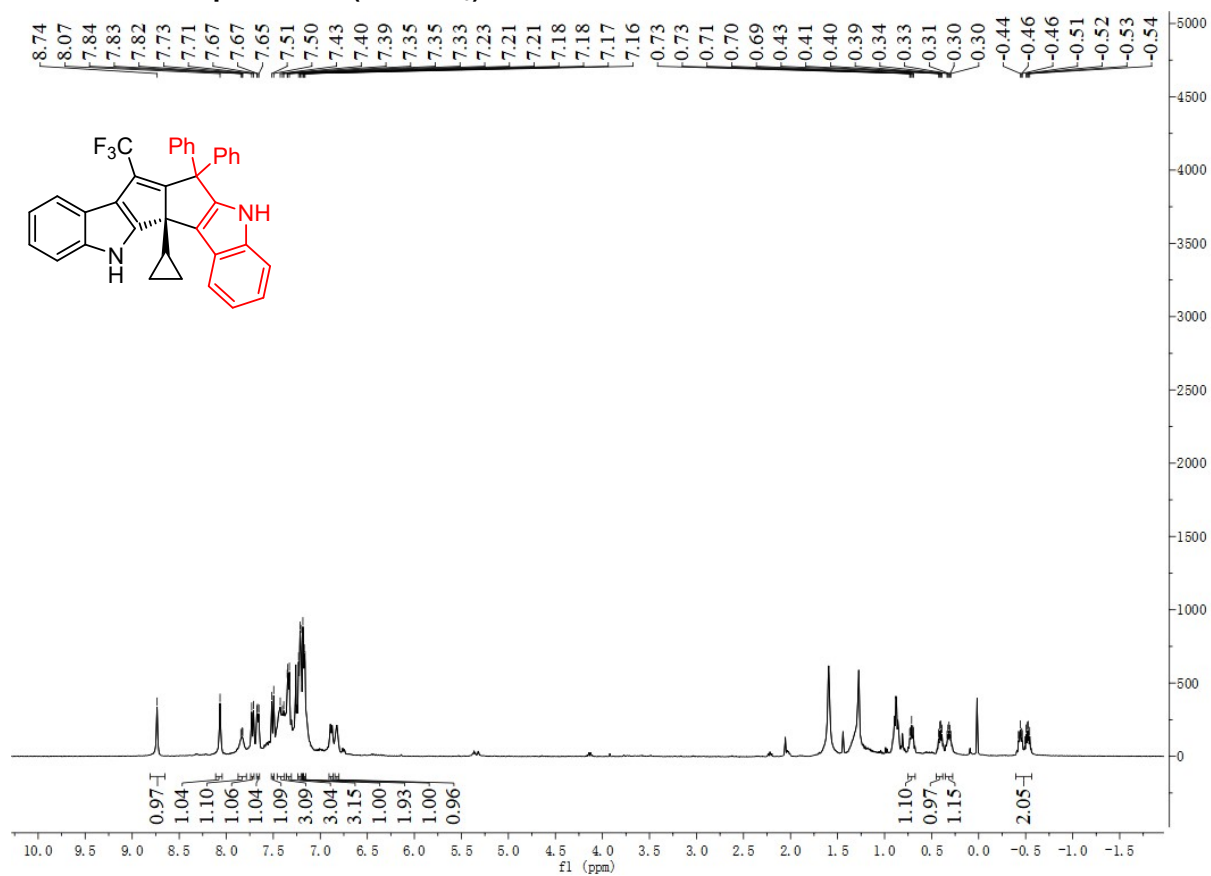

### <sup>13</sup>C NMR of compound 3w (in CDCl<sub>3</sub>)

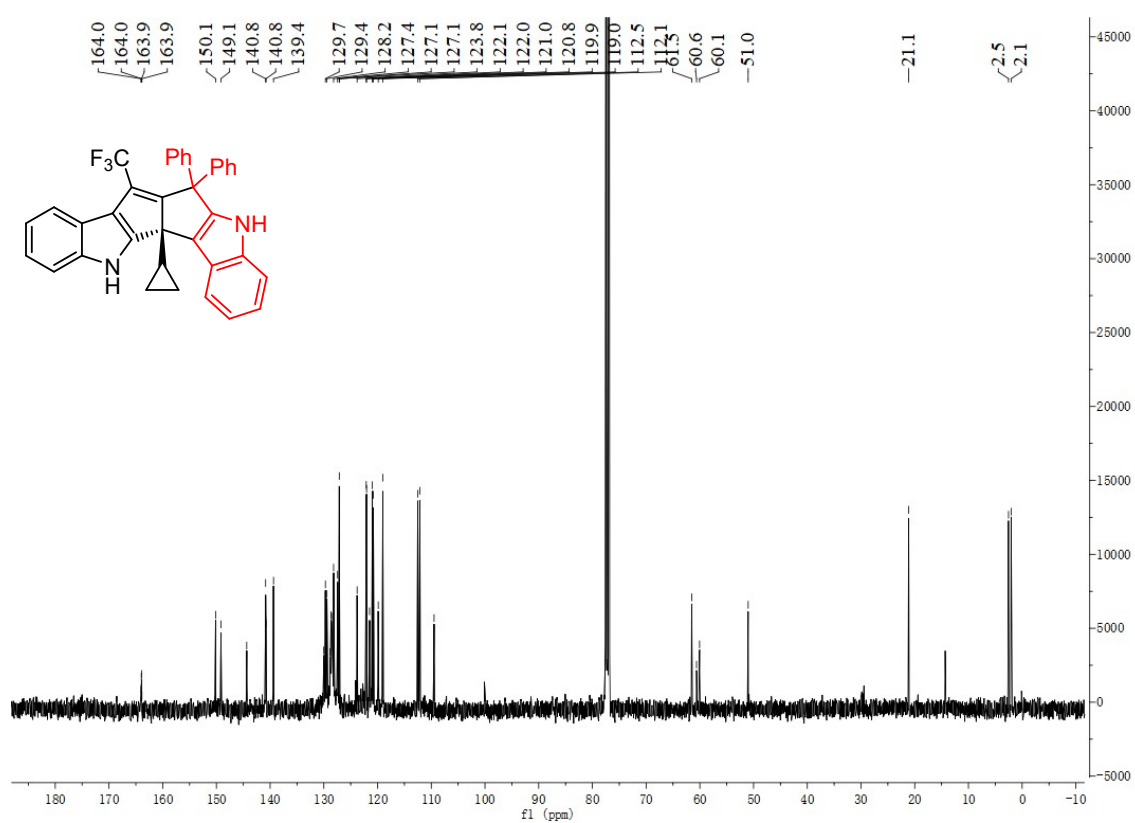

### <sup>19</sup>F NMR of compound 3w (in CDCl<sub>3</sub>)

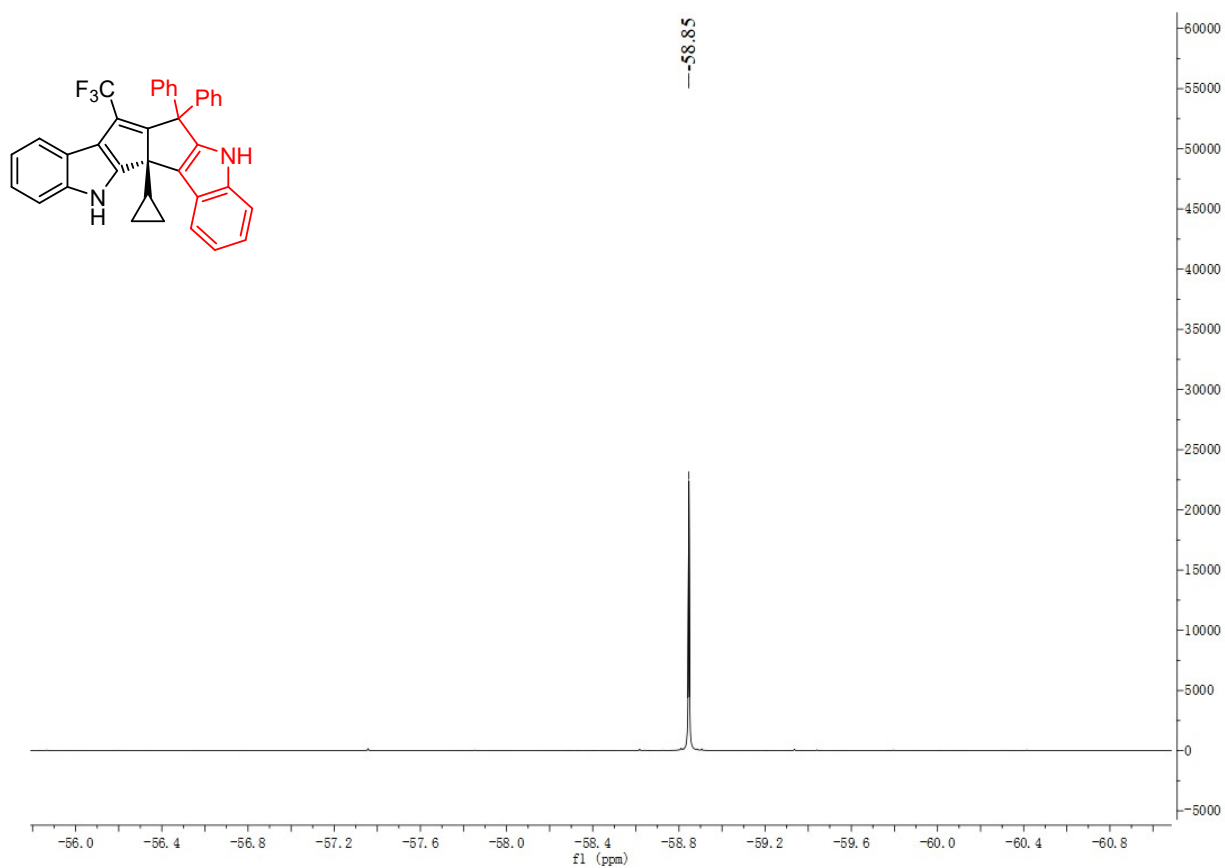

### <sup>1</sup>H NMR of compound 5 (in CDCl<sub>3</sub>)

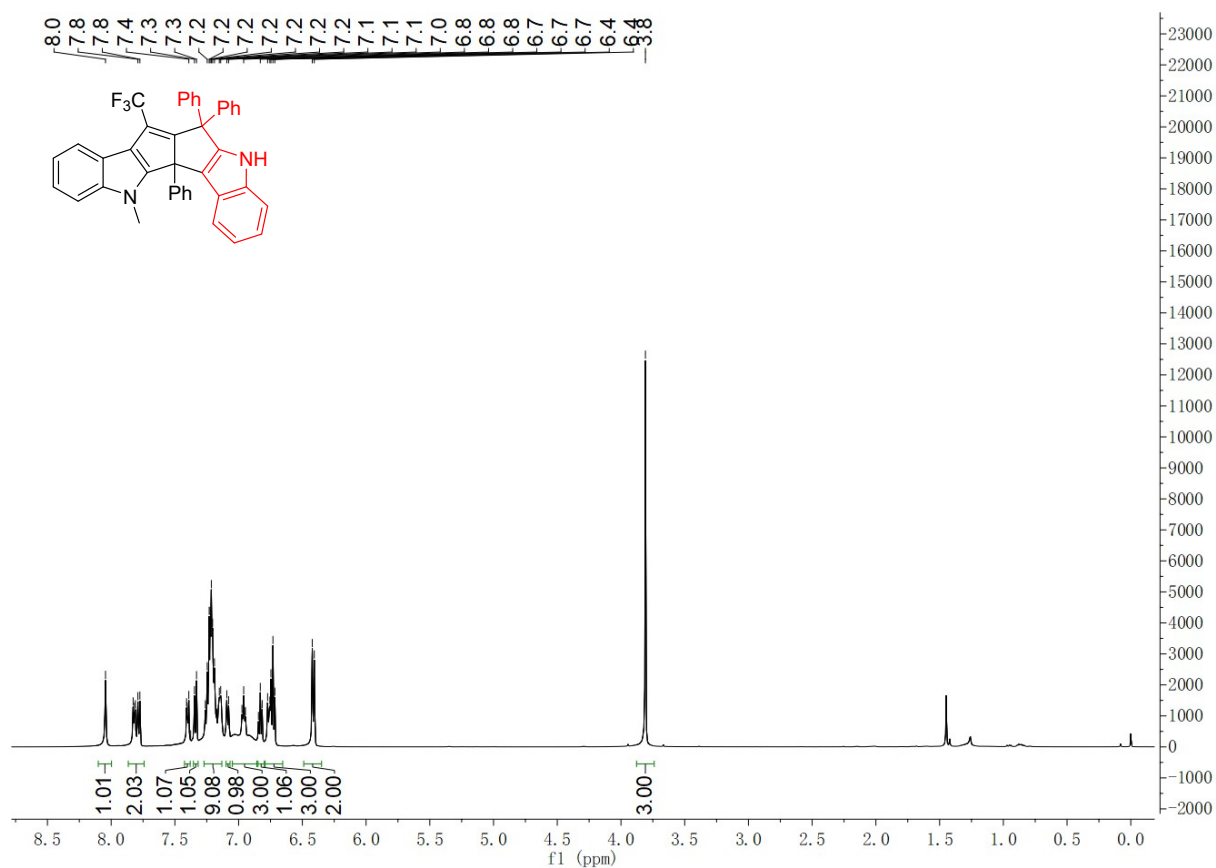

### <sup>13</sup>C NMR of compound 5 (in CDCl<sub>3</sub>)

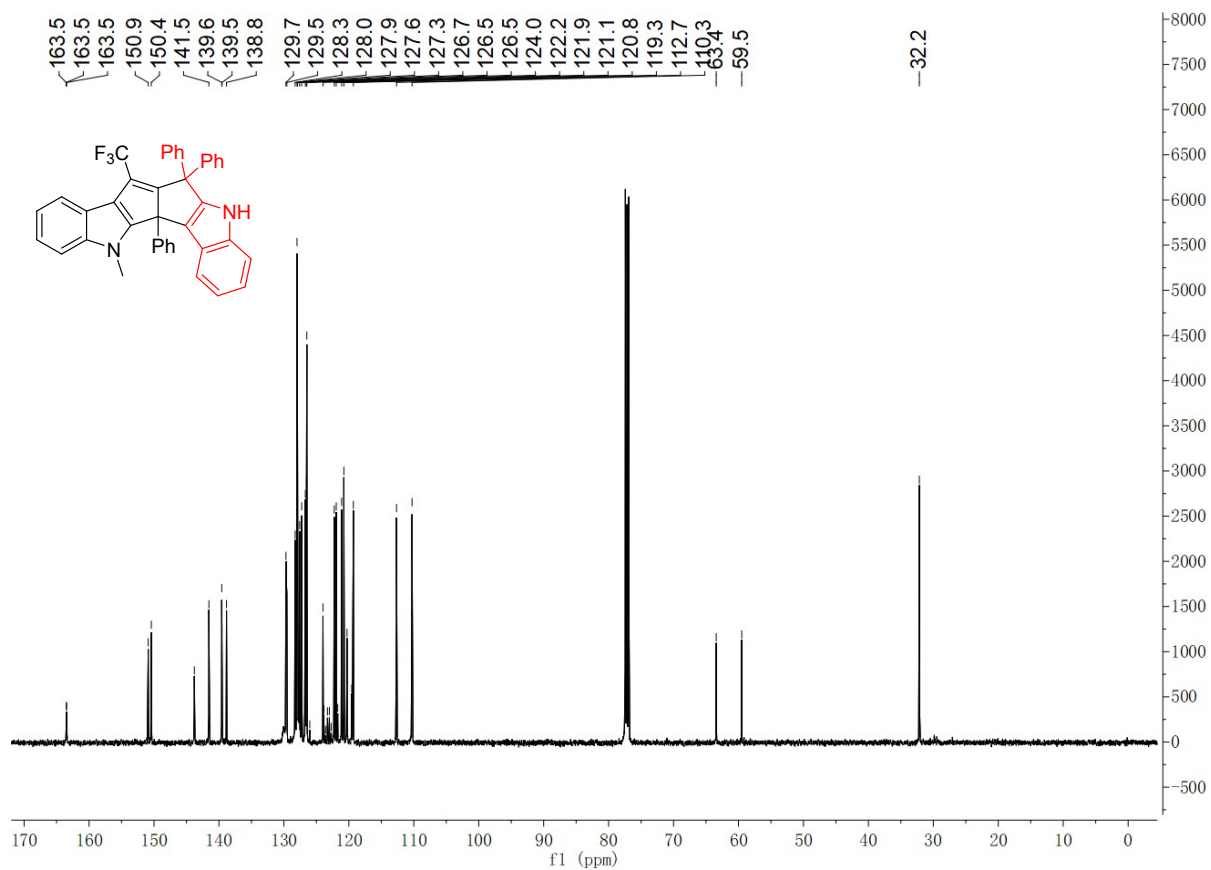

### <sup>19</sup>F NMR of compound 5 (in CDCl<sub>3</sub>)

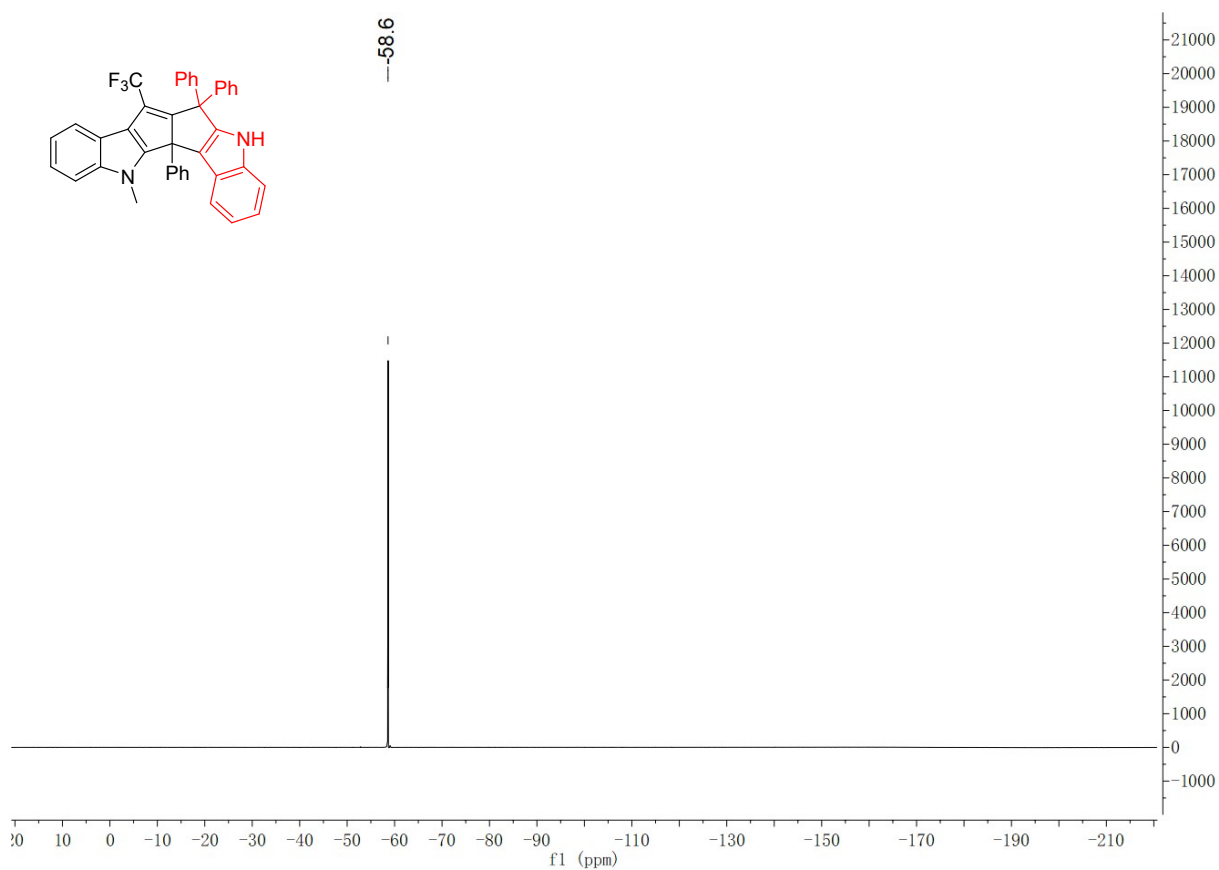

### <sup>1</sup>H NMR of compound 7 (in CDCl<sub>3</sub>)

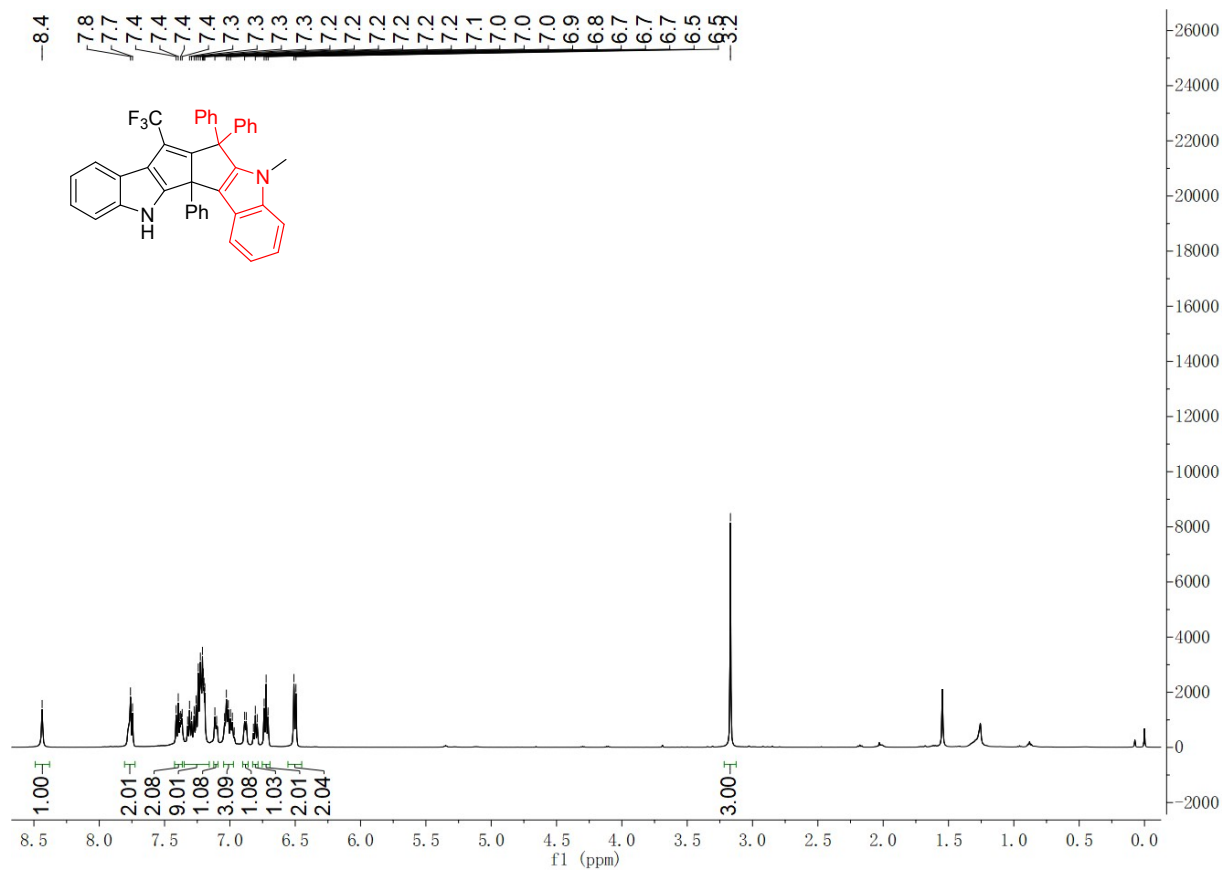

### <sup>13</sup>C NMR of compound 7 (in CDCl<sub>3</sub>)

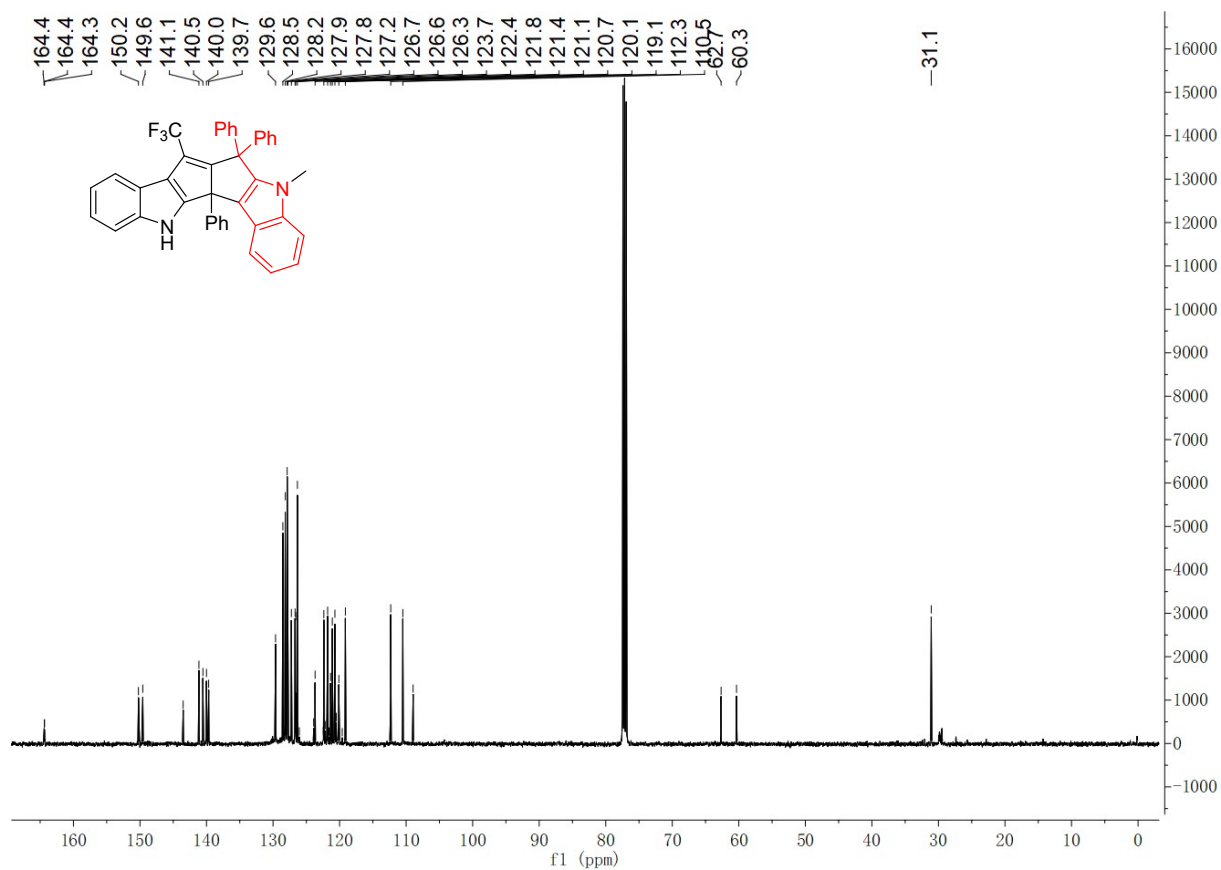

### <sup>19</sup>F NMR of compound 7 (in CDCl<sub>3</sub>)

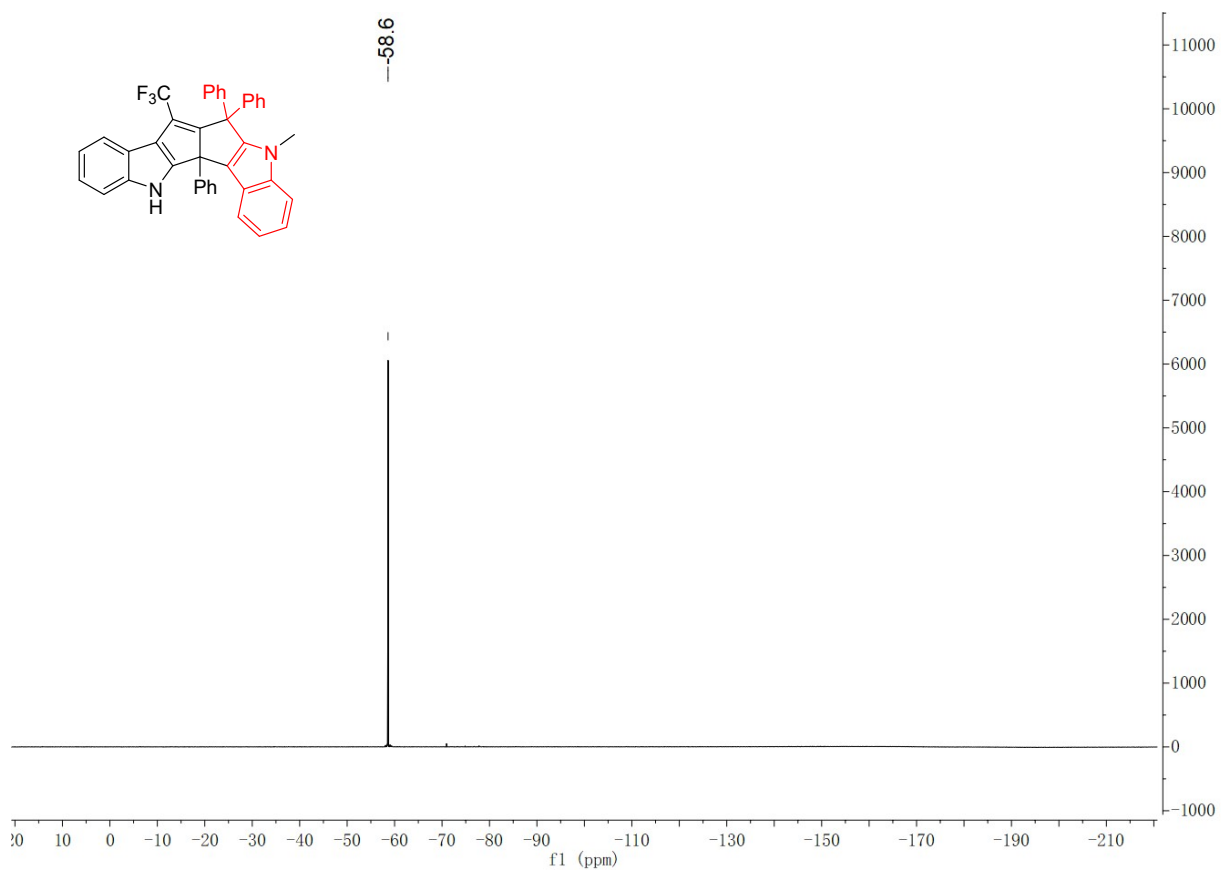

### <sup>1</sup>H NMR of compound 9 (in CDCl<sub>3</sub>)

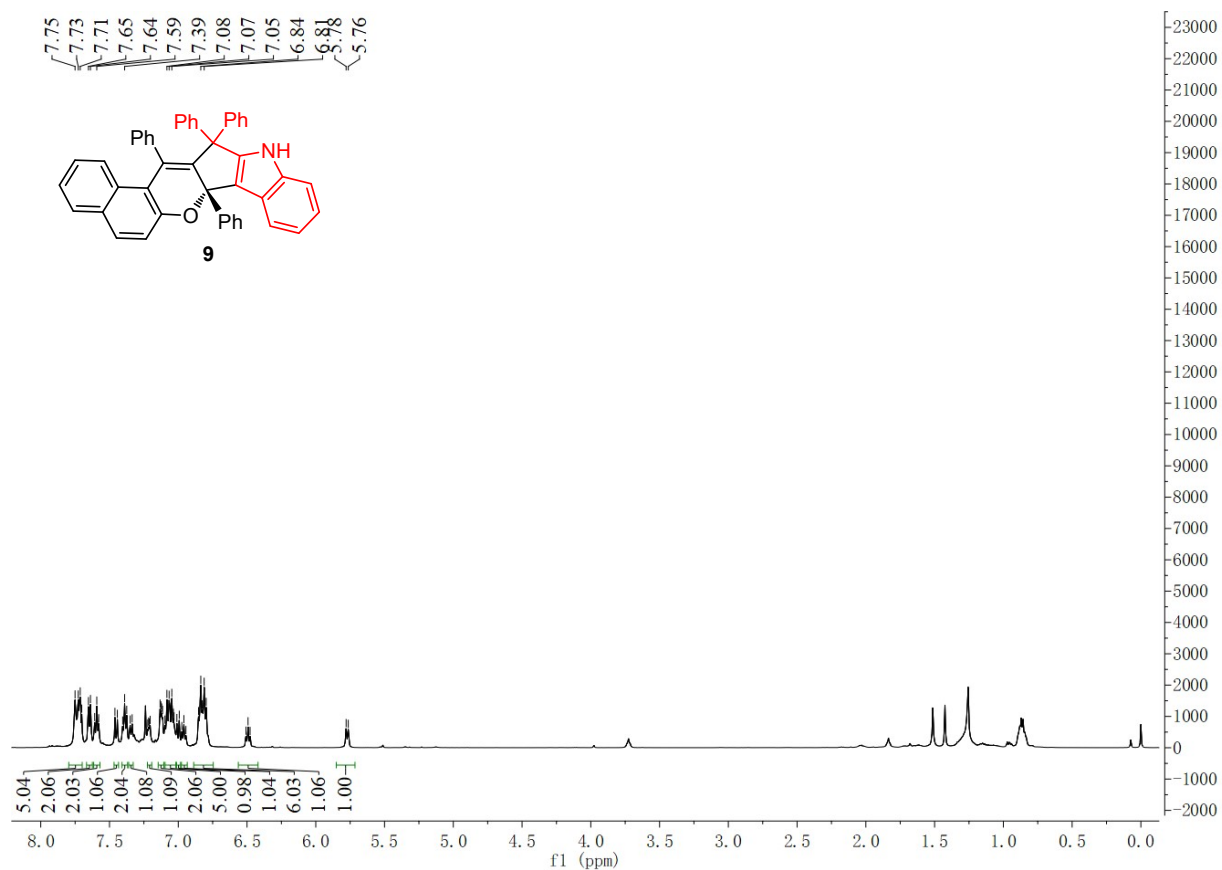

### <sup>13</sup>C NMR of compound 9 (in CDCl<sub>3</sub>)

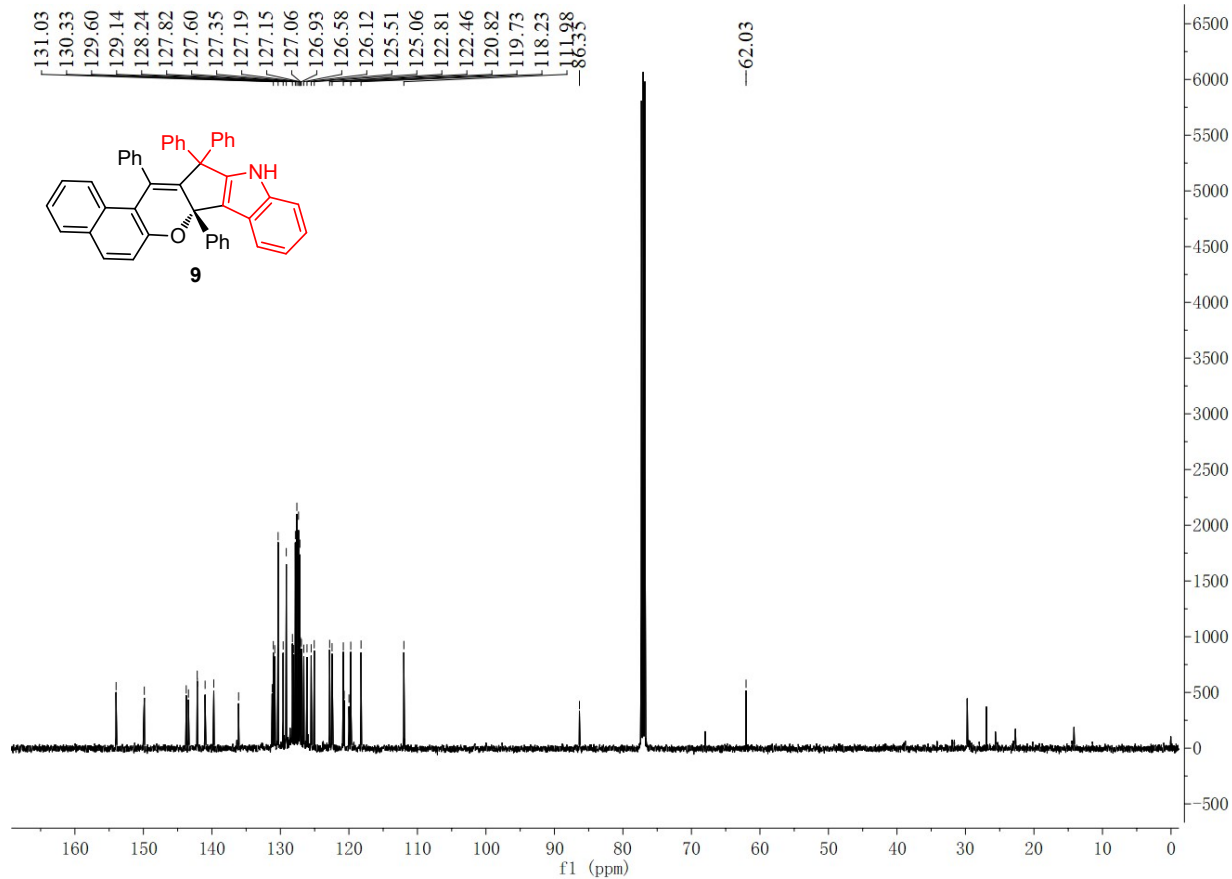





## 8. Copies of HPLC Spectra

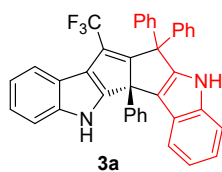

### HPLC spectrum of the racemate

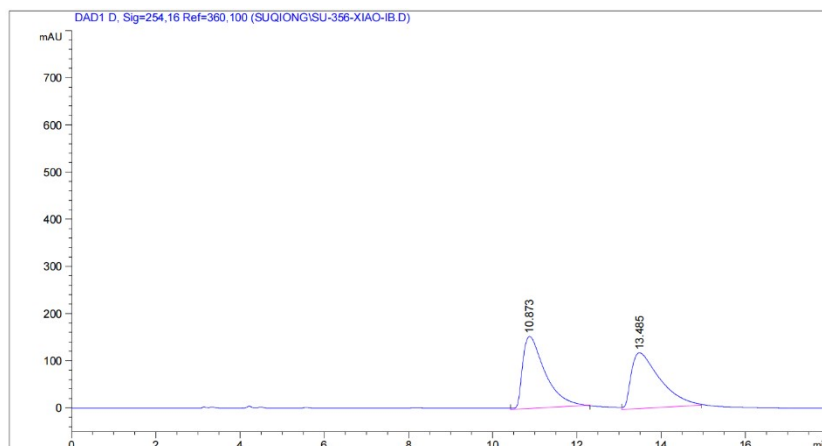

信号 1: DAD1 D, Sig=254,16 Ref=360,100

| 峰 # | 保留时间 [min] | 类型   | 峰宽 [min] | 峰面积 [mAU*s] | 峰高 [mAU]  | 峰面积 %   |
|-----|------------|------|----------|-------------|-----------|---------|
| 1   | 10.873     | MM R | 0.6183   | 5676.04590  | 153.00360 | 50.1581 |
| 2   | 13.485     | MM R | 0.7938   | 5640.25635  | 118.41669 | 49.8419 |

### HPLC spectrum of the enantioenriched compound

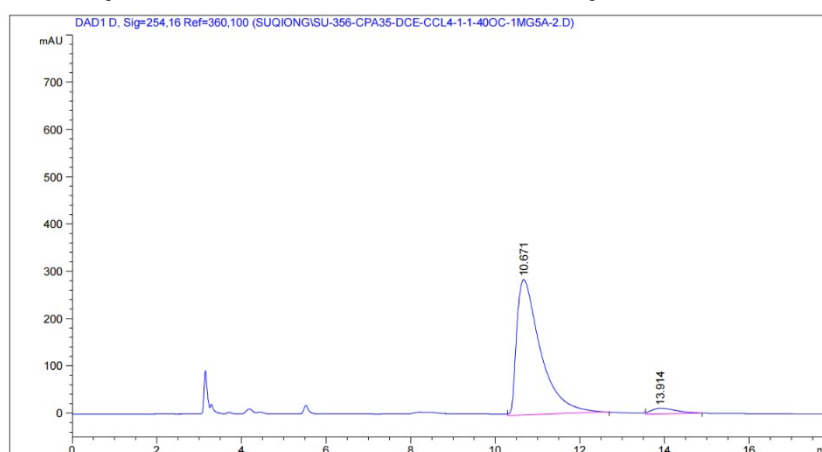

信号 1: DAD1 D, Sig=254,16 Ref=360,100

| 峰 # | 保留时间 [min] | 类型   | 峰宽 [min] | 峰面积 [mAU*s] | 峰高 [mAU]  | 峰面积 %   |
|-----|------------|------|----------|-------------|-----------|---------|
| 1   | 10.671     | MM R | 0.6506   | 1.11519e4   | 285.66281 | 95.9091 |
| 2   | 13.914     | MM R | 0.6713   | 475.66718   | 11.80954  | 4.0909  |

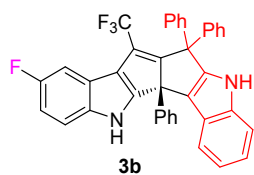

### HPLC spectrum of the racemate

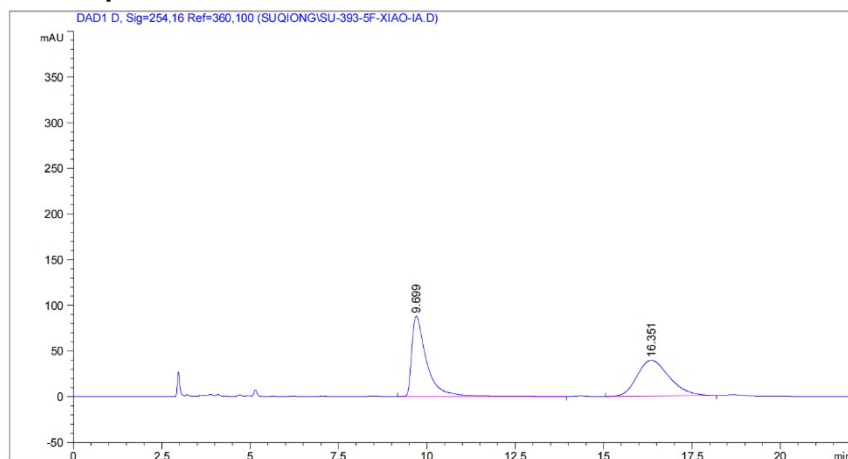

信号 1: DAD1 D, Sig=254,16 Ref=360,100

| 峰 # | 保留时间 [min] | 类型 | 峰宽 [min] | 峰面积 [mAU*s] | 峰高 [mAU] | 峰面积 %   |
|-----|------------|----|----------|-------------|----------|---------|
| 1   | 9.699      | BB | 0.4299   | 2578.75049  | 87.99345 | 50.9629 |
| 2   | 16.351     | BB | 0.9472   | 2481.29932  | 39.05825 | 49.0371 |

### HPLC spectrum of the enantioenriched compound

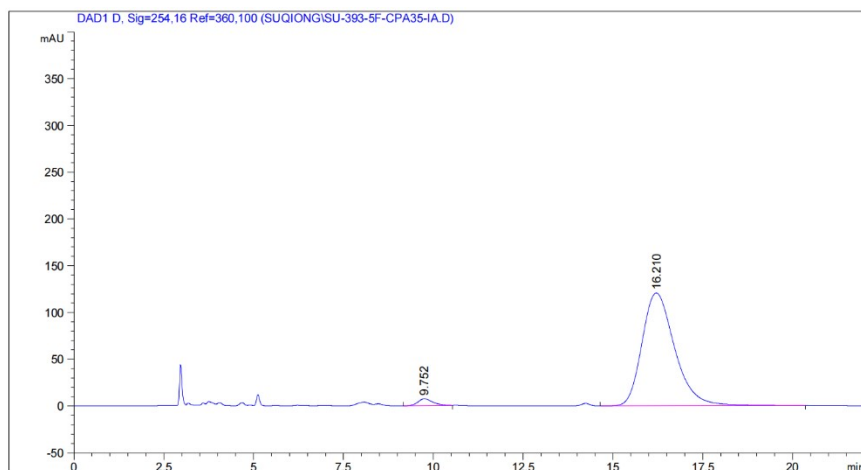

信号 1: DAD1 D, Sig=254,16 Ref=360,100

| 峰 # | 保留时间 [min] | 类型 | 峰宽 [min] | 峰面积 [mAU*s] | 峰高 [mAU]  | 峰面积 %   |
|-----|------------|----|----------|-------------|-----------|---------|
| 1   | 9.752      | BB | 0.4152   | 208.94456   | 7.36093   | 2.6588  |
| 2   | 16.210     | BB | 0.9683   | 7649.60889  | 120.55412 | 97.3412 |

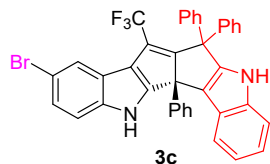

### HPLC spectrum of the racemate

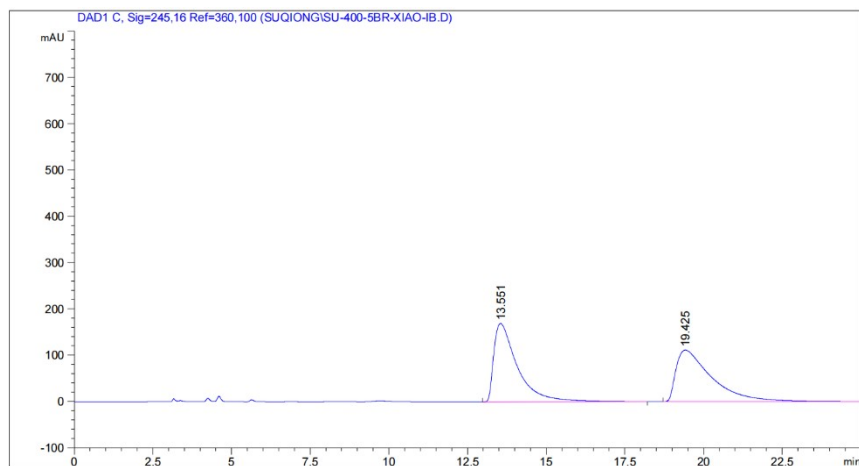

信号 1: DAD1 C, Sig=245,16 Ref=360,100

| 峰 # | 保留时间 [min] | 类型 | 峰宽 [min] | 峰面积 [mAU*s] | 峰高 [mAU]  | 峰面积 %   |
|-----|------------|----|----------|-------------|-----------|---------|
| 1   | 13.551     | BB | 0.7642   | 8816.94629  | 169.13531 | 50.0694 |
| 2   | 19.425     | BB | 1.1310   | 8792.49219  | 111.13631 | 49.9306 |

### HPLC spectrum of the enantioenriched compound

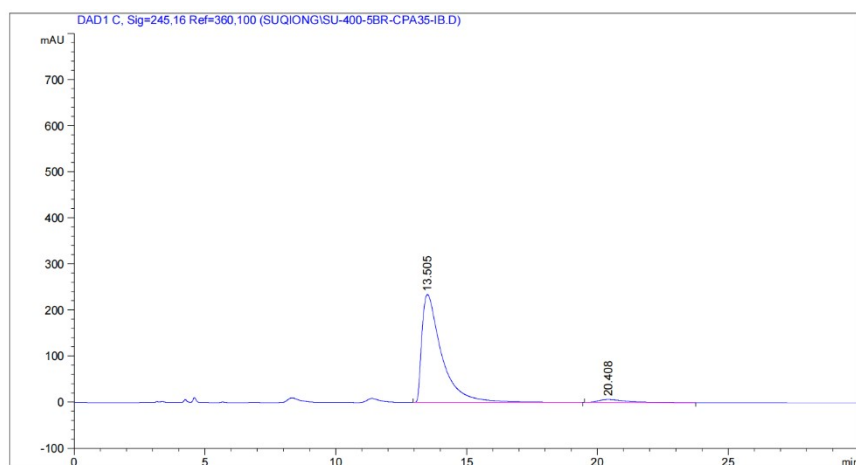

信号 1: DAD1 C, Sig=245,16 Ref=360,100

| 峰 # | 保留时间 [min] | 类型 | 峰宽 [min] | 峰面积 [mAU*s] | 峰高 [mAU]  | 峰面积 %   |
|-----|------------|----|----------|-------------|-----------|---------|
| 1   | 13.505     | BB | 0.7773   | 1.23031e4   | 234.02071 | 96.5608 |
| 2   | 20.408     | BB | 0.8389   | 438.20074   | 6.15302   | 3.4392  |

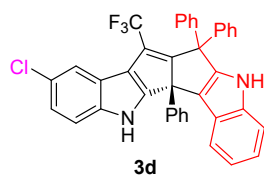

### HPLC spectrum of the racemate

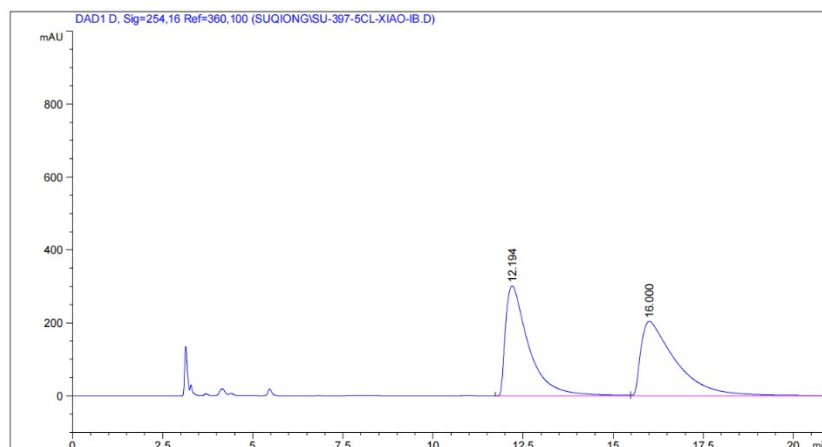

信号 1: DAD1 D, Sig=254,16 Ref=360,100

| 峰 # | 保留时间 [min] | 类型  | 峰宽 [min] | 峰面积 [mAU*s] | 峰高 [mAU]  | 峰面积 %   |
|-----|------------|-----|----------|-------------|-----------|---------|
| 1   | 12.194     | BV  | 0.6588   | 1.35088e4   | 301.46106 | 49.6878 |
| 2   | 16.000     | VBA | 0.9538   | 1.36785e4   | 204.12175 | 50.3122 |

### HPLC spectrum of the enantioenriched compound

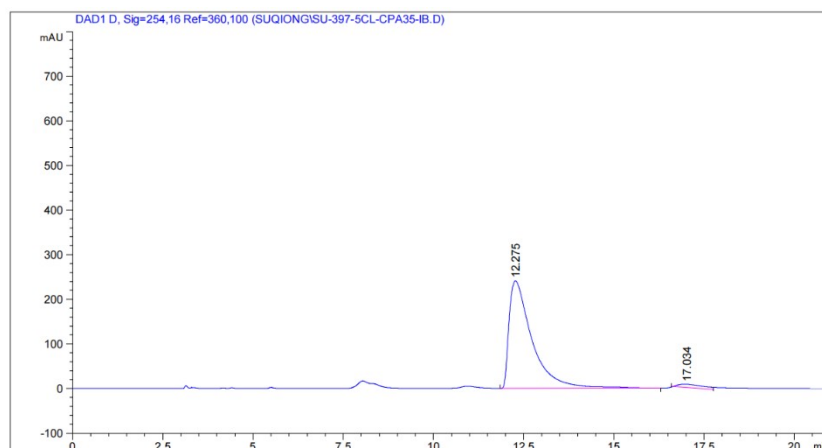

信号 1: DAD1 D, Sig=254,16 Ref=360,100

| 峰 # | 保留时间 [min] | 类型   | 峰宽 [min] | 峰面积 [mAU*s] | 峰高 [mAU]  | 峰面积 %   |
|-----|------------|------|----------|-------------|-----------|---------|
| 1   | 12.275     | BB   | 0.6539   | 1.06919e4   | 240.84969 | 96.5297 |
| 2   | 17.034     | MM R | 0.8472   | 384.38080   | 7.56154   | 3.4703  |

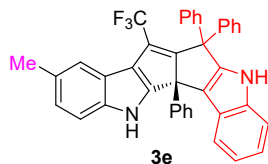

### HPLC spectrum of the racemate

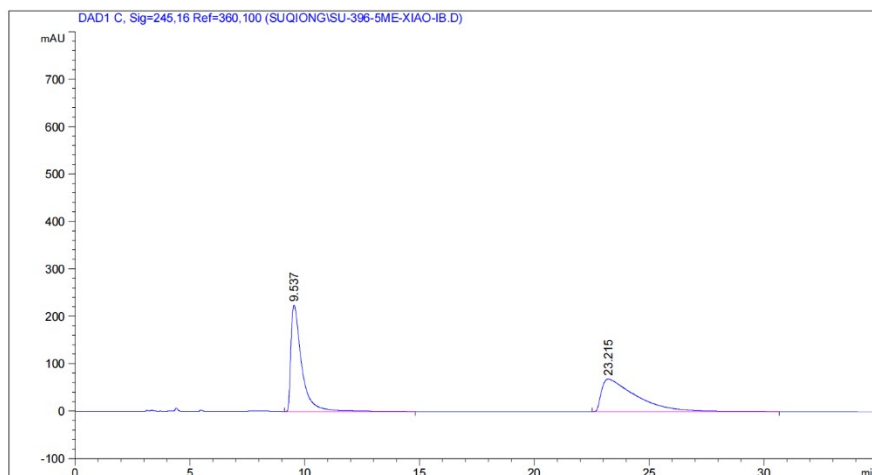

信号 1: DAD1 C, Sig=245,16 Ref=360,100

| 峰 # | 保留时间 [min] | 类型 | 峰宽 [min] | 峰面积 [mAU*s] | 峰高 [mAU]  | 峰面积 %   |
|-----|------------|----|----------|-------------|-----------|---------|
| 1   | 9.537      | BB | 0.4870   | 7364.49023  | 224.31772 | 50.5871 |
| 2   | 23.215     | BB | 1.4082   | 7193.55176  | 68.55206  | 49.4129 |

### HPLC spectrum of the enantioenriched compound

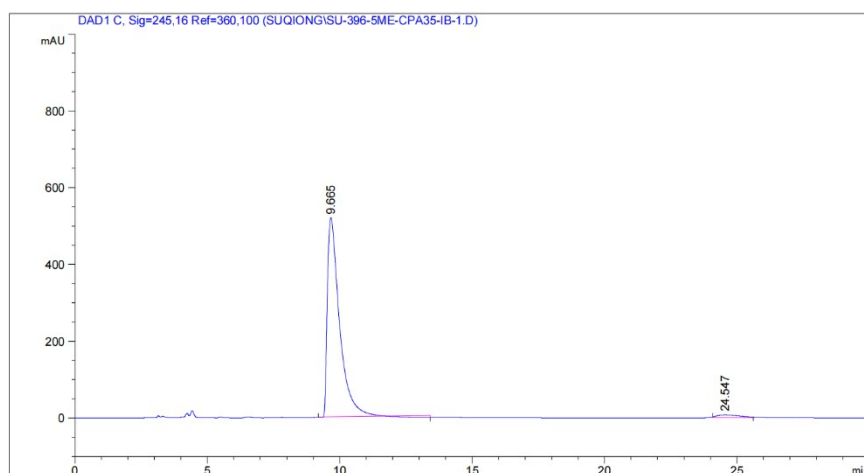

信号 1: DAD1 C, Sig=245,16 Ref=360,100

| 峰 # | 保留时间 [min] | 类型   | 峰宽 [min] | 峰面积 [mAU*s] | 峰高 [mAU]  | 峰面积 %   |
|-----|------------|------|----------|-------------|-----------|---------|
| 1   | 9.665      | MM R | 0.5326   | 1.65877e4   | 519.10730 | 97.4115 |
| 2   | 24.547     | MM R | 1.0129   | 440.78732   | 7.25292   | 2.5885  |

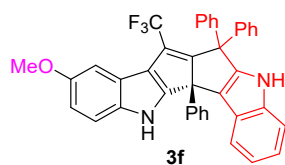

### HPLC spectrum of the racemate

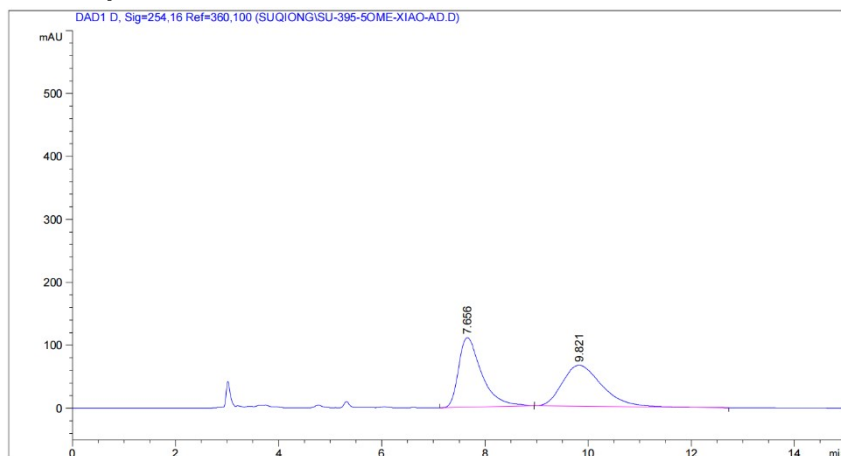

信号 1: DAD1 D, Sig=254,16 Ref=360,100

| 峰 # | 保留时间 [min] | 类型 | 峰宽 [min] | 峰面积 [mAU*s] | 峰高 [mAU]  | 峰面积 %   |
|-----|------------|----|----------|-------------|-----------|---------|
| 1   | 7.656      | BB | 0.4672   | 3438.89990  | 110.46636 | 49.7690 |
| 2   | 9.821      | BB | 0.8057   | 3470.82764  | 65.13085  | 50.2310 |

### HPLC spectrum of the enantioenriched compound

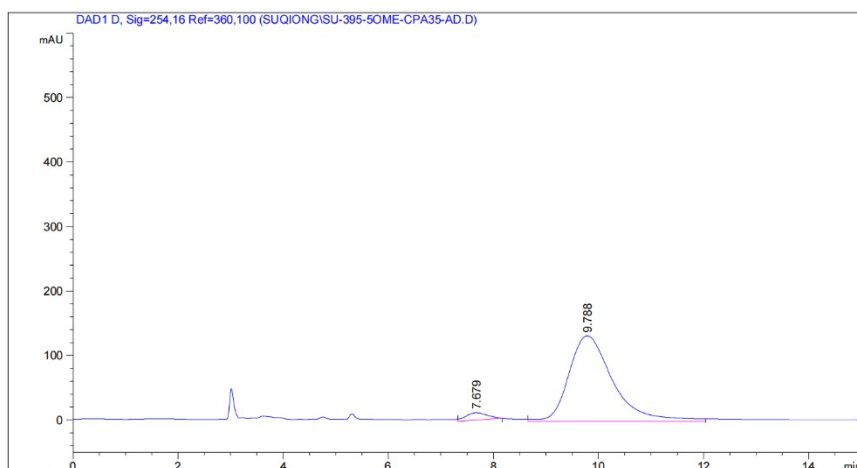

信号 1: DAD1 D, Sig=254,16 Ref=360,100

| 峰 # | 保留时间 [min] | 类型   | 峰宽 [min] | 峰面积 [mAU*s] | 峰高 [mAU]  | 峰面积 %   |
|-----|------------|------|----------|-------------|-----------|---------|
| 1   | 7.679      | MM R | 0.4712   | 313.37573   | 11.08512  | 3.9032  |
| 2   | 9.788      | MM R | 0.9716   | 7715.27539  | 132.34190 | 96.0968 |

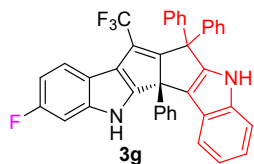

### HPLC spectrum of the racemate

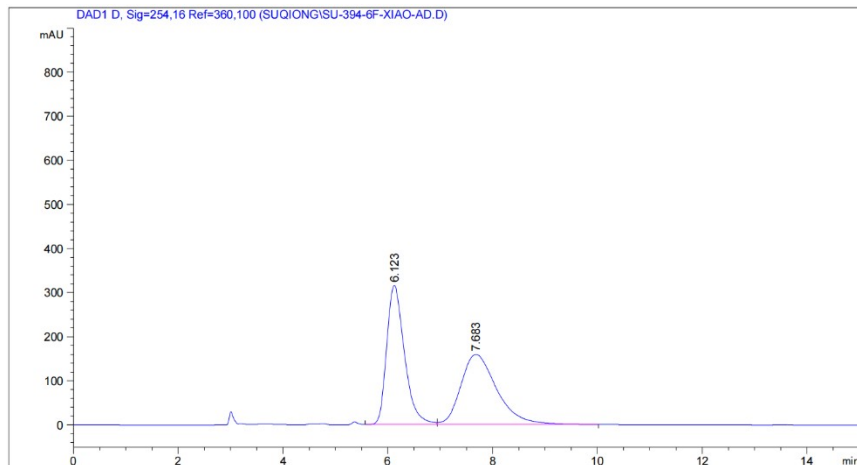

信号 1: DAD1 D, Sig=254,16 Ref=360,100

| 峰 # | 保留时间 [min] | 类型 | 峰宽 [min] | 峰面积 [mAU*s] | 峰高 [mAU]  | 峰面积 %   |
|-----|------------|----|----------|-------------|-----------|---------|
| 1   | 6.123      | BV | 0.3605   | 7418.00732  | 315.23819 | 49.4887 |
| 2   | 7.683      | VB | 0.7277   | 7571.29688  | 158.95178 | 50.5113 |

### HPLC spectrum of the enantioenriched compound

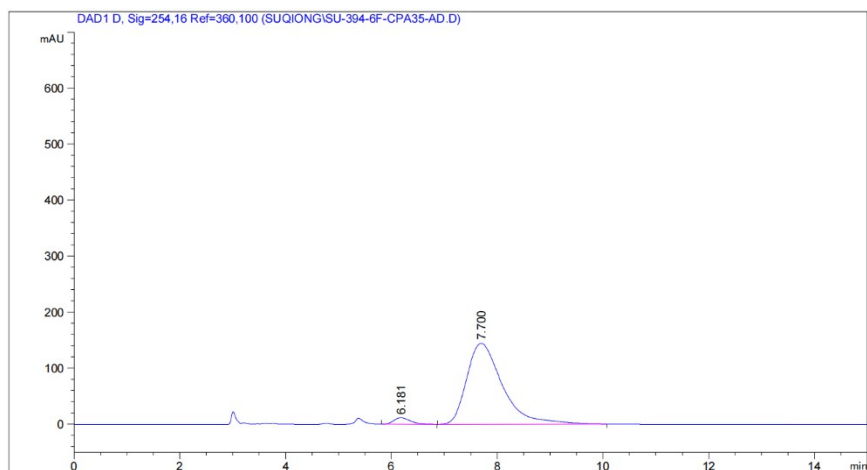

信号 1: DAD1 D, Sig=254,16 Ref=360,100

| 峰 # | 保留时间 [min] | 类型 | 峰宽 [min] | 峰面积 [mAU*s] | 峰高 [mAU]  | 峰面积 %   |
|-----|------------|----|----------|-------------|-----------|---------|
| 1   | 6.181      | BB | 0.3337   | 252.38934   | 11.69851  | 3.5933  |
| 2   | 7.700      | BB | 0.7147   | 6771.57178  | 144.50438 | 96.4067 |



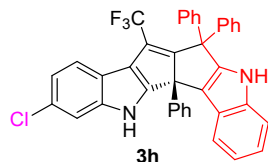

### HPLC spectrum of the racemate

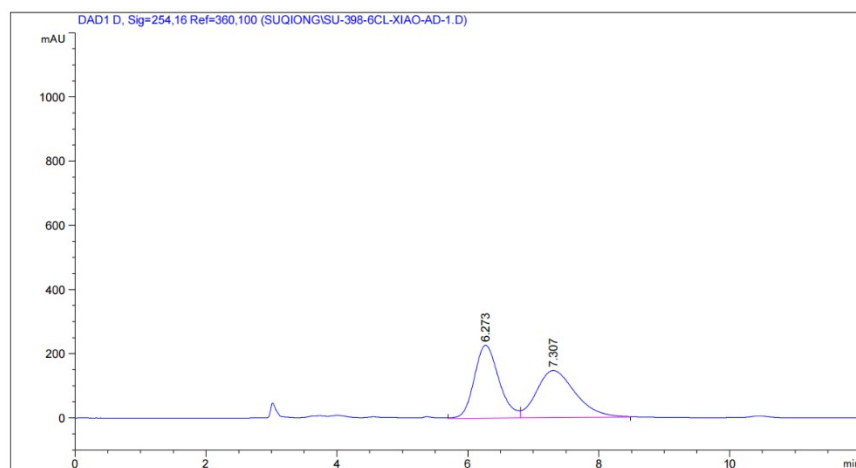

信号 1: DAD1 D, Sig=254,16 Ref=360,100

| 峰 # | 保留时间 [min] | 类型   | 峰宽 [min] | 峰面积 [mAU*s] | 峰高 [mAU]  | 峰面积 %   |
|-----|------------|------|----------|-------------|-----------|---------|
| 1   | 6.273      | MF R | 0.4377   | 5978.38623  | 227.63902 | 49.7327 |
| 2   | 7.307      | FM R | 0.6854   | 6042.65430  | 146.93446 | 50.2673 |

### HPLC spectrum of the enantioenriched compound

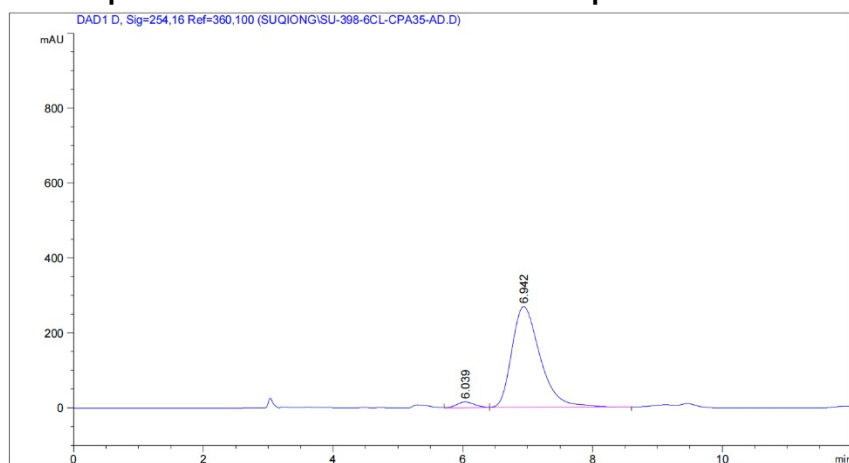

信号 1: DAD1 D, Sig=254,16 Ref=360,100

| 峰 # | 保留时间 [min] | 类型 | 峰宽 [min] | 峰面积 [mAU*s] | 峰高 [mAU]  | 峰面积 %   |
|-----|------------|----|----------|-------------|-----------|---------|
| 1   | 6.039      | VV | 0.2972   | 289.76547   | 15.14319  | 3.4242  |
| 2   | 6.942      | VB | 0.4664   | 8172.57666  | 269.05099 | 96.5758 |

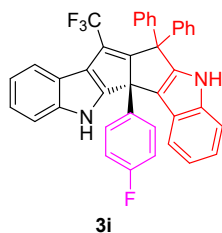

### HPLC spectrum of the racemate

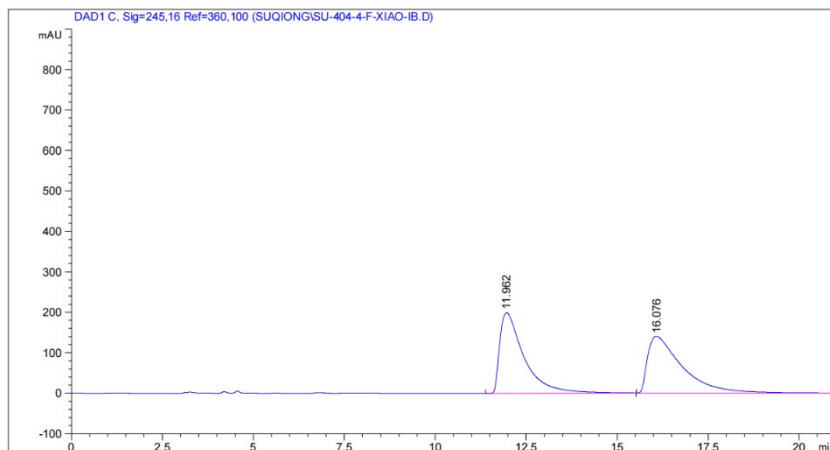

信号 1: DAD1 C, Sig=245,16 Ref=360,100

| 峰 # | 保留时间 [min] | 类型  | 峰宽 [min] | 峰面积 [mAU*s] | 峰高 [mAU]  | 峰面积 %   |
|-----|------------|-----|----------|-------------|-----------|---------|
| 1   | 11.962     | BB  | 0.6852   | 9226.88867  | 198.88986 | 49.8352 |
| 2   | 16.076     | BBA | 0.9485   | 9287.90527  | 140.26390 | 50.1648 |

### HPLC spectrum of the enantioenriched compound

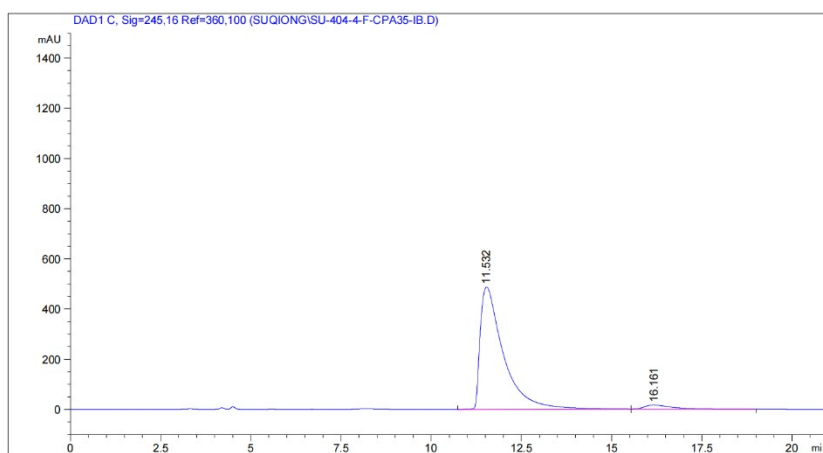

信号 1: DAD1 C, Sig=245,16 Ref=360,100

| 峰 # | 保留时间 [min] | 类型 | 峰宽 [min] | 峰面积 [mAU*s] | 峰高 [mAU]  | 峰面积 %   |
|-----|------------|----|----------|-------------|-----------|---------|
| 1   | 11.532     | BB | 0.6528   | 2.17626e4   | 487.47021 | 96.3237 |
| 2   | 16.161     | BB | 0.7742   | 830.58527   | 15.47383  | 3.6763  |

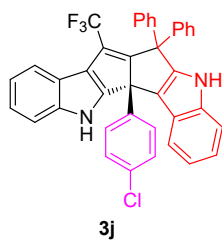

### HPLC spectrum of the racemate

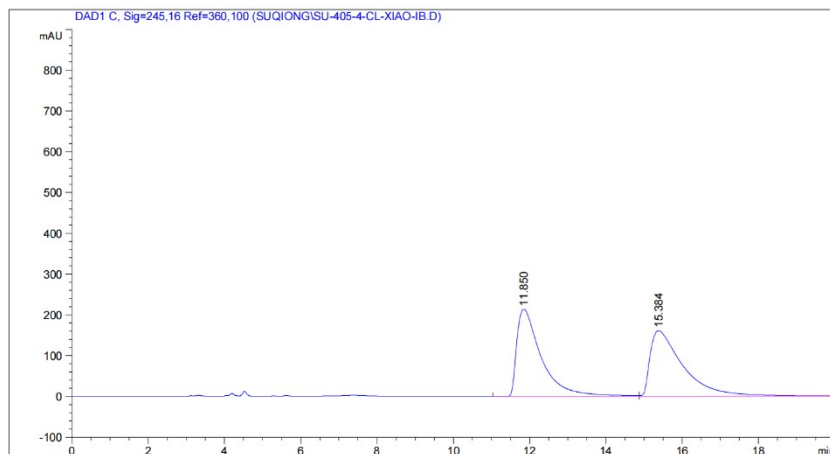

信号 1: DAD1 C, Sig=245,16 Ref=360,100

| 峰 # | 保留时间 [min] | 类型  | 峰宽 [min] | 峰面积 [mAU*s] | 峰高 [mAU]  | 峰面积 %   |
|-----|------------|-----|----------|-------------|-----------|---------|
| 1   | 11.850     | BV  | 0.6580   | 9532.00586  | 213.86977 | 49.7827 |
| 2   | 15.384     | VBA | 0.8719   | 9615.21875  | 160.73650 | 50.2173 |

### HPLC spectrum of the enantioenriched compound

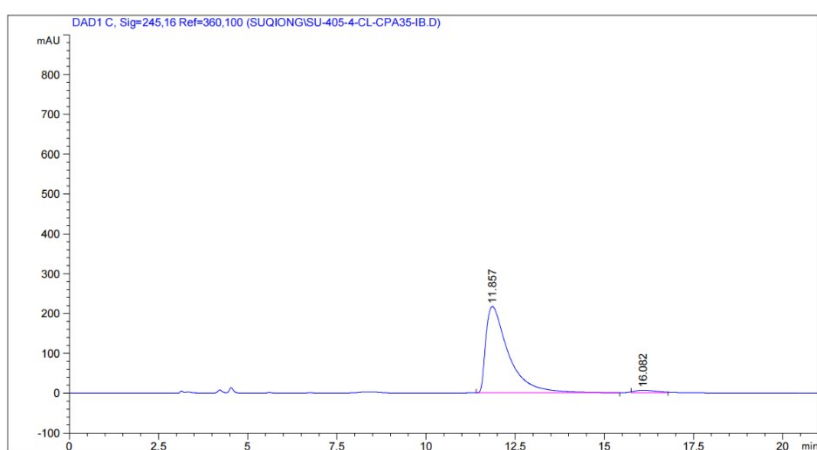

信号 1: DAD1 C, Sig=245,16 Ref=360,100

| 峰 # | 保留时间 [min] | 类型   | 峰宽 [min] | 峰面积 [mAU*s] | 峰高 [mAU]  | 峰面积 %   |
|-----|------------|------|----------|-------------|-----------|---------|
| 1   | 11.857     | BB   | 0.6516   | 9568.56543  | 216.49388 | 97.1472 |
| 2   | 16.082     | MM R | 0.7123   | 280.98480   | 6.57450   | 2.8528  |

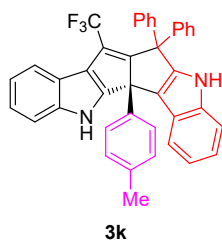

### HPLC spectrum of the racemate

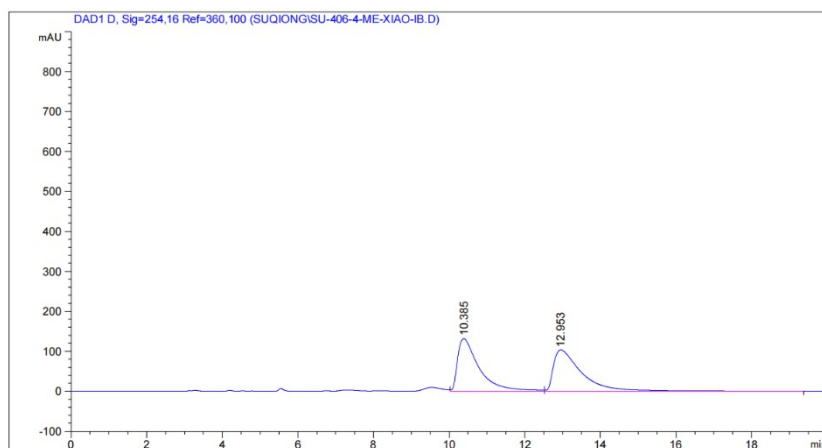

信号 1: DAD1 D, Sig=254,16 Ref=360,100

| 峰 # | 保留时间 [min] | 类型 | 峰宽 [min] | 峰面积 [mAU*s] | 峰高 [mAU]  | 峰面积 %   |
|-----|------------|----|----------|-------------|-----------|---------|
| 1   | 10.385     | VV | 0.5779   | 5197.17871  | 131.27740 | 49.3217 |
| 2   | 12.953     | VB | 0.7632   | 5340.13135  | 102.94147 | 50.6783 |

### HPLC spectrum of the enantioenriched compound

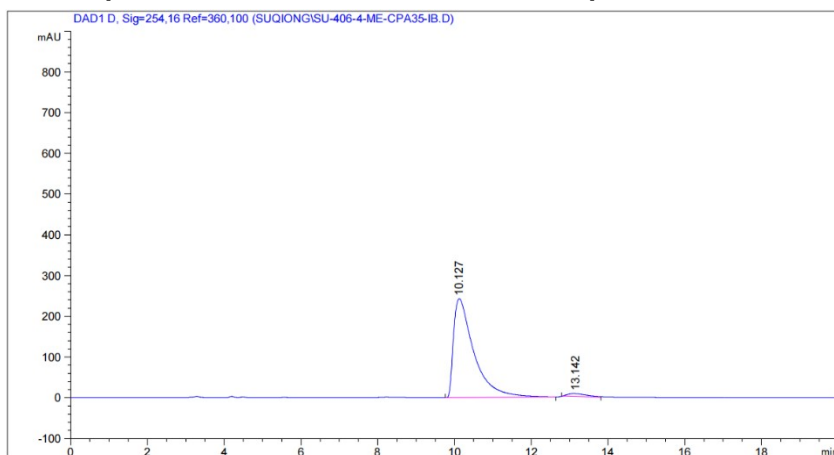

信号 1: DAD1 D, Sig=254,16 Ref=360,100

| 峰 # | 保留时间 [min] | 类型   | 峰宽 [min] | 峰面积 [mAU*s] | 峰高 [mAU]  | 峰面积 %   |
|-----|------------|------|----------|-------------|-----------|---------|
| 1   | 10.127     | BB   | 0.5445   | 8956.59570  | 242.74779 | 97.2916 |
| 2   | 13.142     | MM R | 0.6020   | 249.33090   | 6.90240   | 2.7084  |

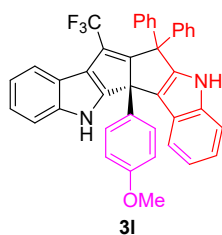

### HPLC spectrum of the racemate

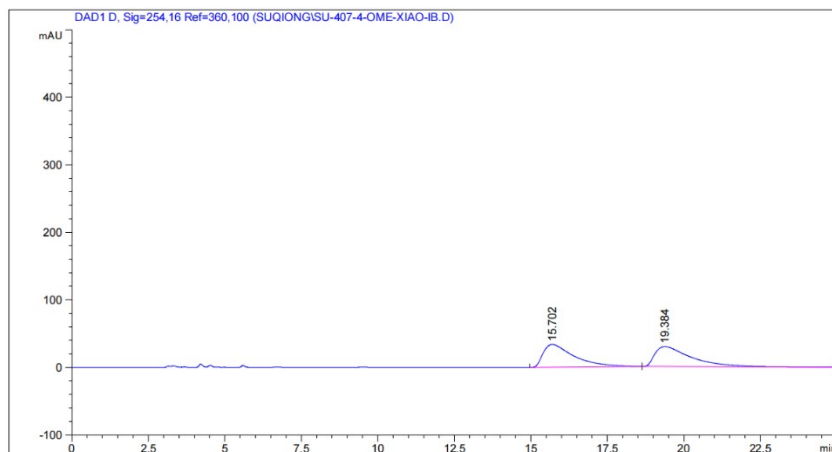

信号 1: DAD1 D, Sig=254,16 Ref=360,100

| 峰 # | 保留时间 [min] | 类型 | 峰宽 [min] | 峰面积 [mAU*s] | 峰高 [mAU] | 峰面积 %   |
|-----|------------|----|----------|-------------|----------|---------|
| 1   | 15.702     | BB | 1.0130   | 2407.94287  | 33.80563 | 49.3171 |
| 2   | 19.384     | BB | 1.1601   | 2474.62500  | 29.57738 | 50.6829 |

### HPLC spectrum of the enantioenriched compound

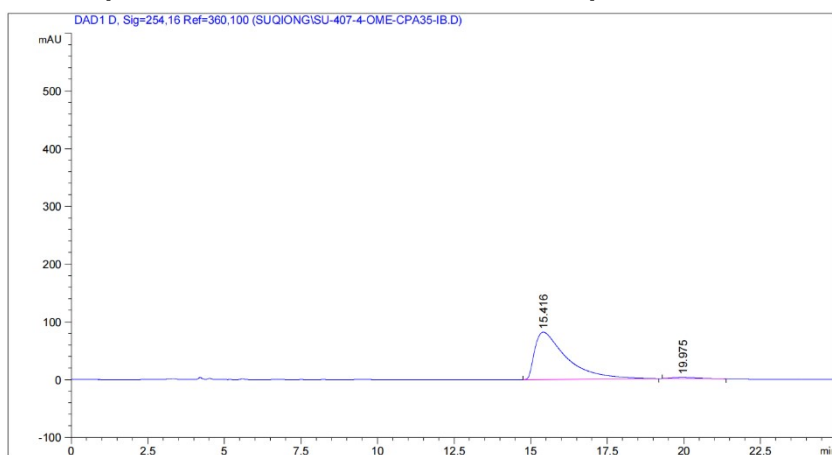

信号 1: DAD1 D, Sig=254,16 Ref=360,100

| 峰 # | 保留时间 [min] | 类型   | 峰宽 [min] | 峰面积 [mAU*s] | 峰高 [mAU] | 峰面积 %   |
|-----|------------|------|----------|-------------|----------|---------|
| 1   | 15.416     | BB   | 1.0328   | 5923.20605  | 81.98966 | 98.1514 |
| 2   | 19.975     | MM R | 0.9678   | 111.55567   | 1.92107  | 1.8486  |

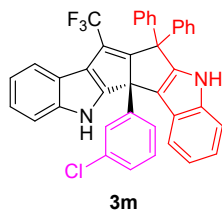

### HPLC spectrum of the racemate

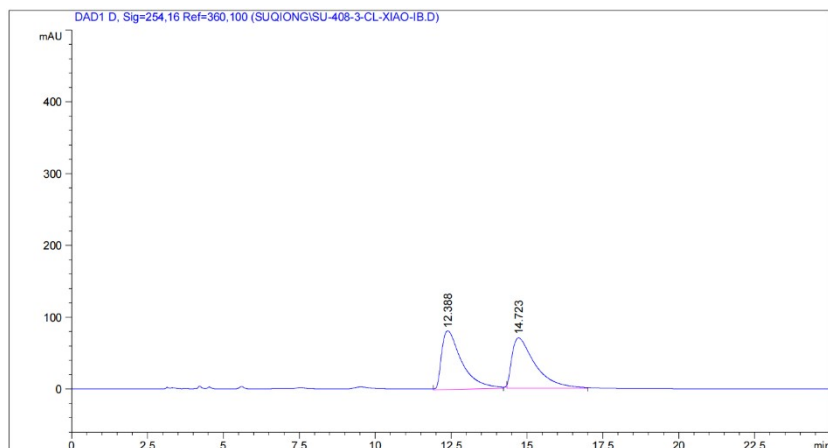

信号 1: DAD1 D, Sig=254,16 Ref=360,100

| 峰 # | 保留时间 [min] | 类型   | 峰宽 [min] | 峰面积 [mAU*s] | 峰高 [mAU] | 峰面积 %   |
|-----|------------|------|----------|-------------|----------|---------|
| 1   | 12.388     | MM R | 0.7751   | 3809.15112  | 81.91010 | 50.2003 |
| 2   | 14.723     | MM R | 0.8954   | 3778.75781  | 70.33413 | 49.7997 |

### HPLC spectrum of the enantioenriched compound

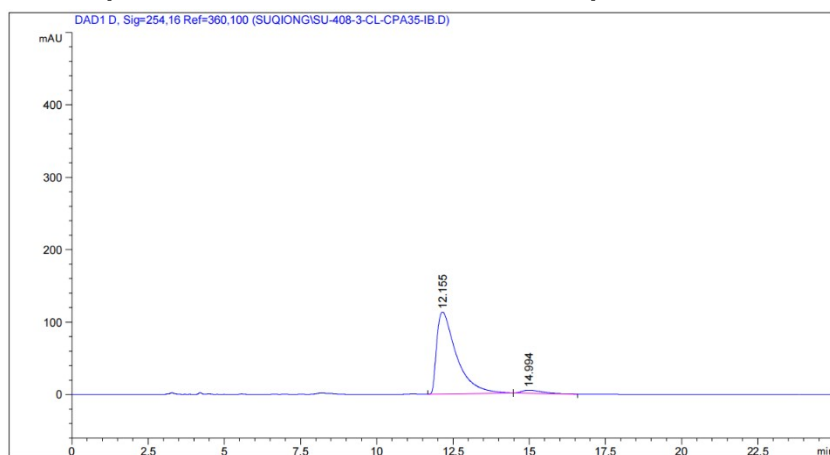

信号 1: DAD1 D, Sig=254,16 Ref=360,100

| 峰 # | 保留时间 [min] | 类型 | 峰宽 [min] | 峰面积 [mAU*s] | 峰高 [mAU]  | 峰面积 %   |
|-----|------------|----|----------|-------------|-----------|---------|
| 1   | 12.155     | BB | 0.6609   | 5099.30957  | 113.34273 | 96.4014 |
| 2   | 14.994     | BB | 0.6004   | 190.35158   | 4.31718   | 3.5986  |

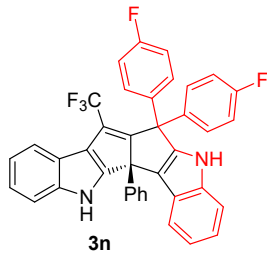

### HPLC spectrum of the racemate

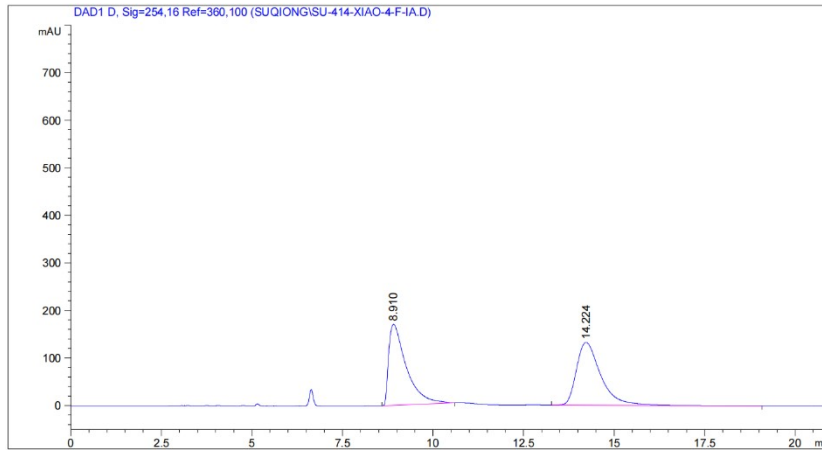

信号 1: DAD1 D, Sig=254,16 Ref=360,100

| 峰 # | 保留时间 [min] | 类型 | 峰宽 [min] | 峰面积 [mAU*s] | 峰高 [mAU]  | 峰面积 %   |
|-----|------------|----|----------|-------------|-----------|---------|
| 1   | 8.910      | BB | 0.4945   | 5766.10645  | 170.51221 | 48.1247 |
| 2   | 14.224     | BB | 0.7034   | 6215.49756  | 132.47508 | 51.8753 |

### HPLC spectrum of the enantioenriched compound

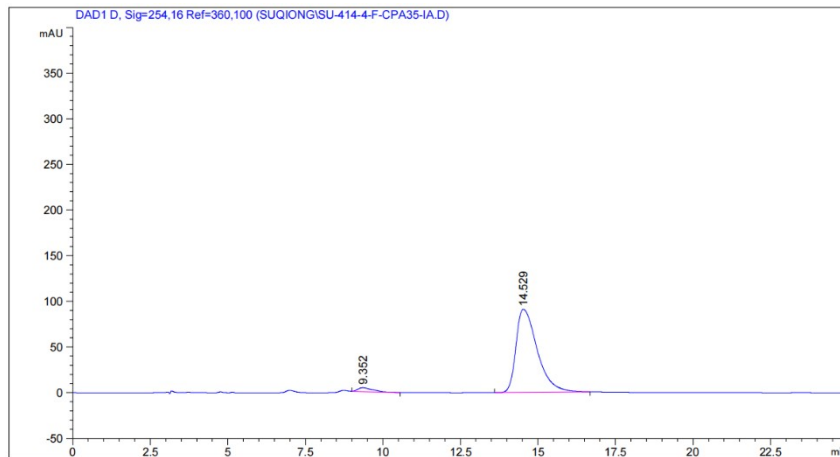

信号 1: DAD1 D, Sig=254,16 Ref=360,100

| 峰 # | 保留时间 [min] | 类型 | 峰宽 [min] | 峰面积 [mAU*s] | 峰高 [mAU] | 峰面积 %   |
|-----|------------|----|----------|-------------|----------|---------|
| 1   | 9.352      | BB | 0.4712   | 136.64609   | 4.22660  | 3.0568  |
| 2   | 14.529     | BB | 0.7285   | 4333.53760  | 90.84709 | 96.9432 |

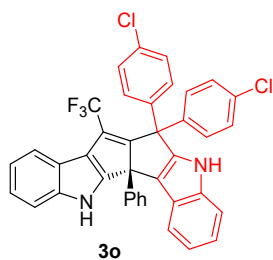

### HPLC spectrum of the racemate

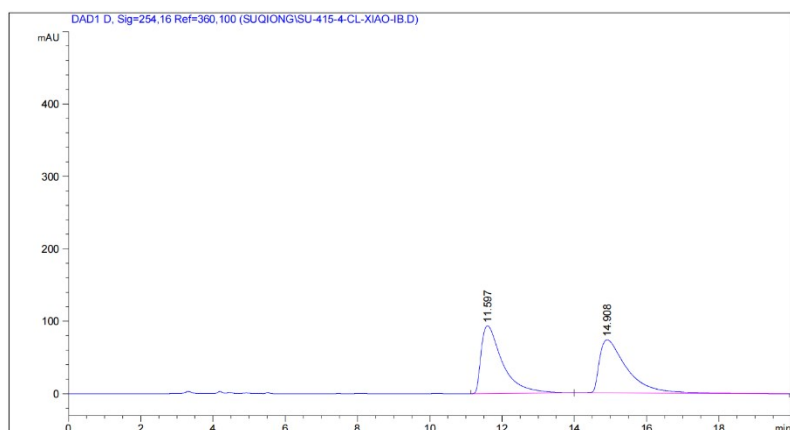

信号 1: DAD1 D, Sig=254,16 Ref=360,100

| 峰 # | 保留时间 [min] | 类型  | 峰宽 [min] | 峰面积 [mAU*s] | 峰高 [mAU] | 峰面积 %   |
|-----|------------|-----|----------|-------------|----------|---------|
| 1   | 11.597     | BB  | 0.6091   | 3829.26611  | 93.64758 | 49.5590 |
| 2   | 14.908     | BBA | 0.7703   | 3897.41772  | 73.53433 | 50.4410 |

### HPLC spectrum of the enantioenriched compound

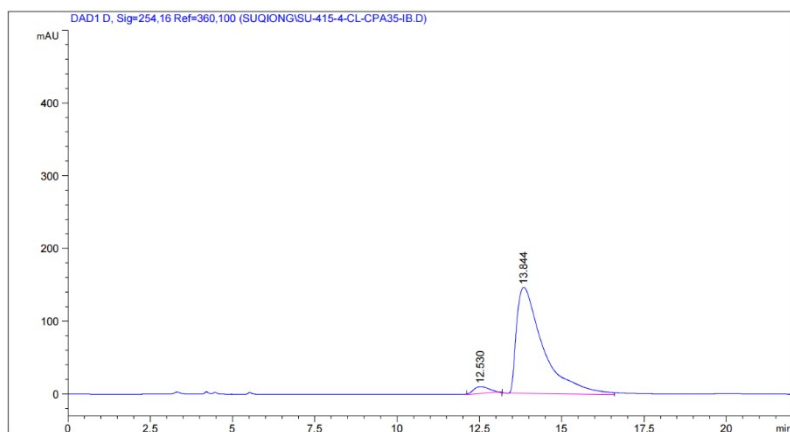

信号 1: DAD1 D, Sig=254,16 Ref=360,100

| 峰 # | 保留时间 [min] | 类型   | 峰宽 [min] | 峰面积 [mAU*s] | 峰高 [mAU]  | 峰面积 %   |
|-----|------------|------|----------|-------------|-----------|---------|
| 1   | 12.530     | MM R | 0.5223   | 295.15820   | 9.41770   | 3.4834  |
| 2   | 13.844     | MM R | 0.9356   | 8178.06934  | 145.68179 | 96.5166 |



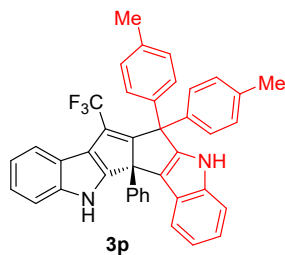

### HPLC spectrum of the racemate

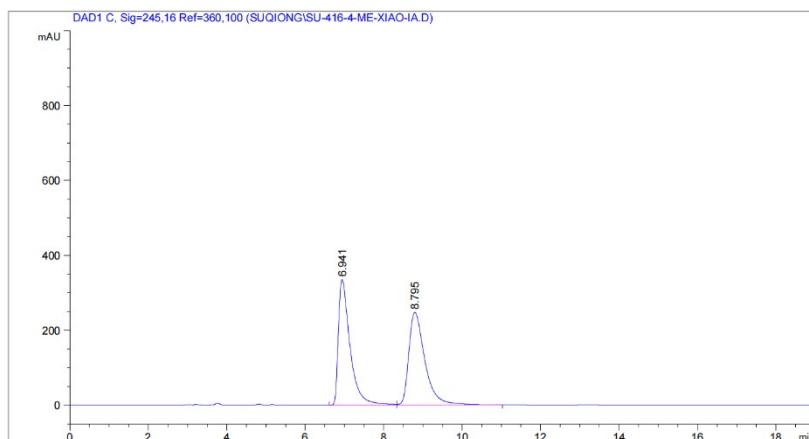

信号 1: DAD1 C, Sig=245,16 Ref=360,100

| 峰 # | 保留时间 [min] | 类型 | 峰宽 [min] | 峰面积 [mAU*s] | 峰高 [mAU]  | 峰面积 %   |
|-----|------------|----|----------|-------------|-----------|---------|
| 1   | 6.941      | BV | 0.3070   | 6914.88867  | 334.71680 | 49.5424 |
| 2   | 8.795      | VB | 0.4299   | 7042.62256  | 247.59163 | 50.4576 |

### HPLC spectrum of the enantioenriched compound

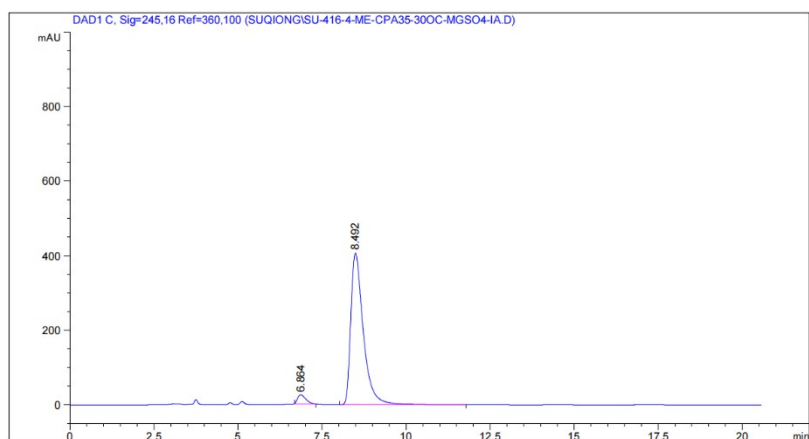

信号 1: DAD1 C, Sig=245,16 Ref=360,100

| 峰 # | 保留时间 [min] | 类型   | 峰宽 [min] | 峰面积 [mAU*s] | 峰高 [mAU]  | 峰面积 %   |
|-----|------------|------|----------|-------------|-----------|---------|
| 1   | 6.864      | MM R | 0.2794   | 405.80634   | 24.20663  | 3.6757  |
| 2   | 8.492      | BB   | 0.3950   | 1.06344e4   | 406.79831 | 96.3243 |

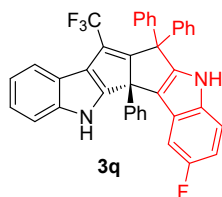

### HPLC spectrum of the racemate

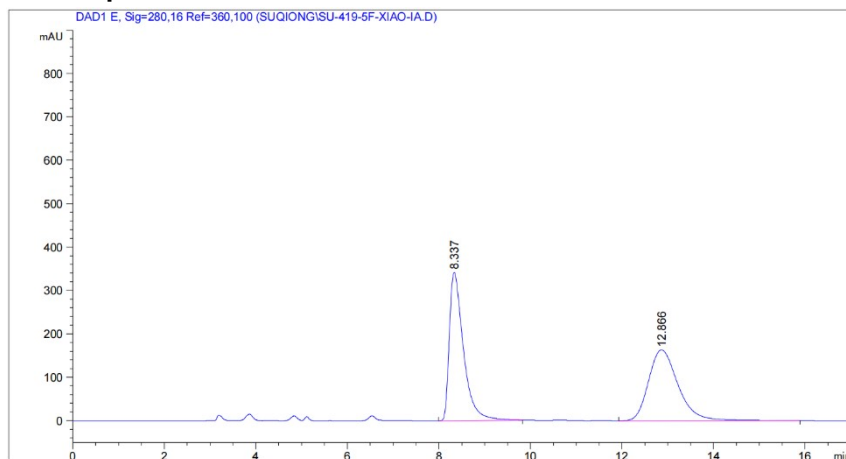

信号 1: DAD1 E, Sig=280,16 Ref=360,100

| 峰 # | 保留时间 [min] | 类型 | 峰宽 [min] | 峰面积 [mAU*s] | 峰高 [mAU]  | 峰面积 %   |
|-----|------------|----|----------|-------------|-----------|---------|
| 1   | 8.337      | BB | 0.3231   | 7287.90332  | 341.34735 | 49.8853 |
| 2   | 12.866     | BB | 0.6895   | 7321.41602  | 163.17613 | 50.1147 |

### HPLC spectrum of the enantioenriched compound

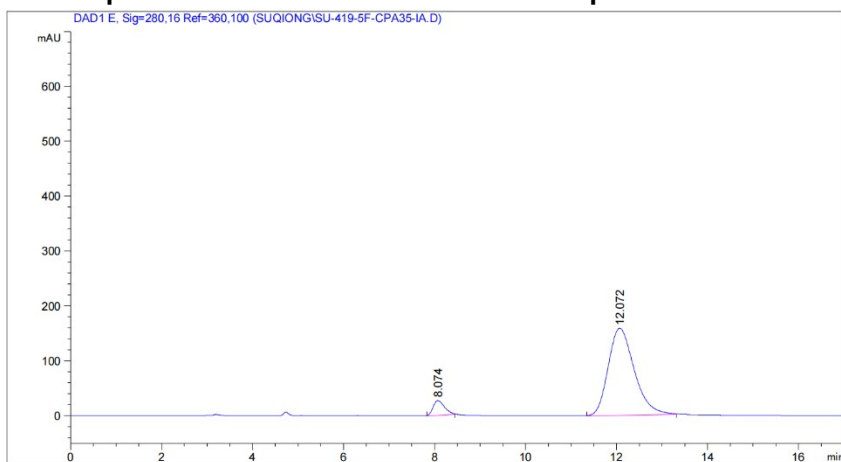

信号 1: DAD1 E, Sig=280,16 Ref=360,100

| 峰 # | 保留时间 [min] | 类型   | 峰宽 [min] | 峰面积 [mAU*s] | 峰高 [mAU]  | 峰面积 %   |
|-----|------------|------|----------|-------------|-----------|---------|
| 1   | 8.074      | MM R | 0.2925   | 472.14484   | 26.89991  | 6.9333  |
| 2   | 12.072     | MM R | 0.6653   | 6337.67920  | 158.76044 | 93.0667 |

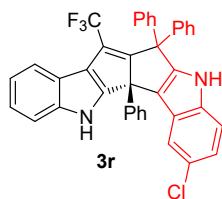

### HPLC spectrum of the racemate

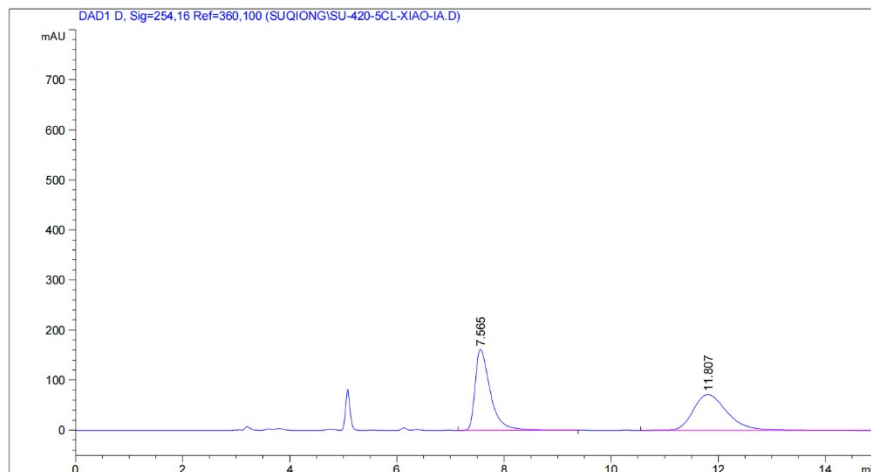

信号 1: DAD1 D, Sig=254,16 Ref=360,100

| 峰 # | 保留时间 [min] | 类型 | 峰宽 [min] | 峰面积 [mAU*s] | 峰高 [mAU]  | 峰面积 %   |
|-----|------------|----|----------|-------------|-----------|---------|
| 1   | 7.565      | BB | 0.2966   | 3190.10913  | 161.38489 | 49.7325 |
| 2   | 11.807     | BB | 0.6861   | 3224.43115  | 71.77167  | 50.2675 |

### HPLC spectrum of the enantioenriched compound

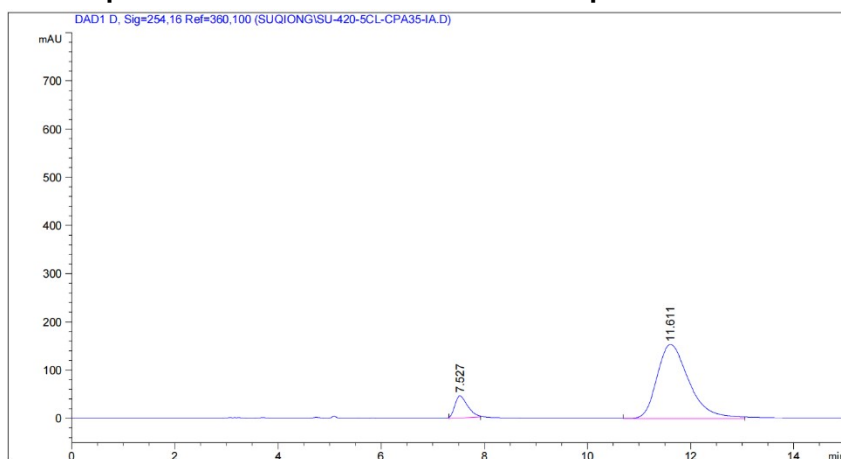

信号 1: DAD1 D, Sig=254,16 Ref=360,100

| 峰 # | 保留时间 [min] | 类型   | 峰宽 [min] | 峰面积 [mAU*s] | 峰高 [mAU]  | 峰面积 %   |
|-----|------------|------|----------|-------------|-----------|---------|
| 1   | 7.527      | MM R | 0.2900   | 803.18469   | 46.15590  | 10.7743 |
| 2   | 11.611     | MM R | 0.7215   | 6651.47412  | 153.64421 | 89.2257 |

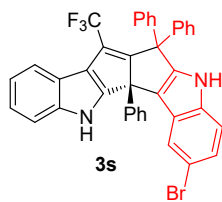

### HPLC spectrum of the racemate

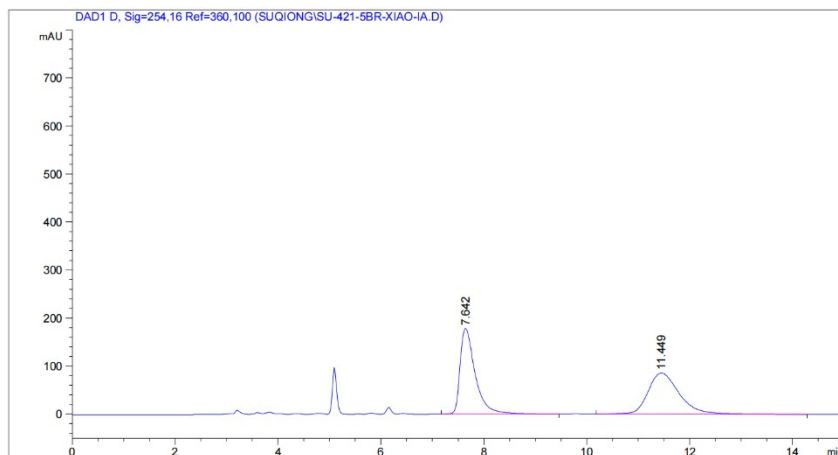

信号 1: DAD1 D, Sig=254,16 Ref=360,100

| 峰 # | 保留时间 [min] | 类型 | 峰宽 [min] | 峰面积 [mAU*s] | 峰高 [mAU]  | 峰面积 %   |
|-----|------------|----|----------|-------------|-----------|---------|
| 1   | 7.642      | BB | 0.3054   | 3660.49805  | 178.38788 | 50.1868 |
| 2   | 11.449     | BB | 0.6504   | 3633.25439  | 85.74265  | 49.8132 |

### HPLC spectrum of the enantioenriched compound

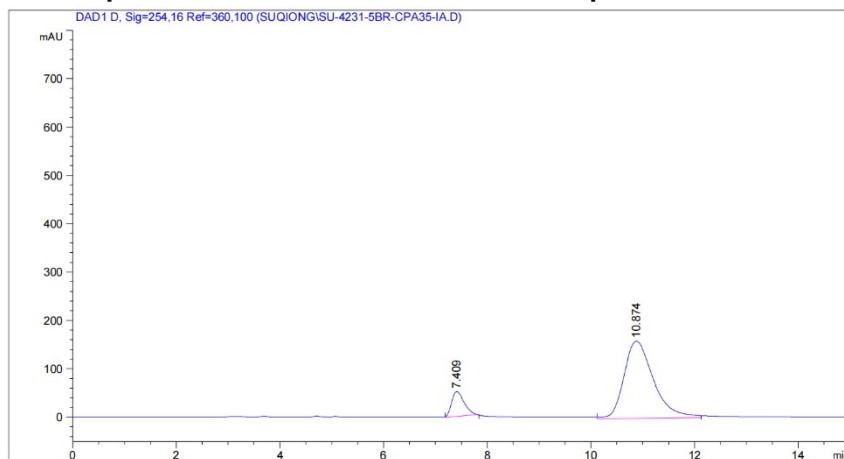

信号 1: DAD1 D, Sig=254,16 Ref=360,100

| 峰 # | 保留时间 [min] | 类型   | 峰宽 [min] | 峰面积 [mAU*s] | 峰高 [mAU]  | 峰面积 %   |
|-----|------------|------|----------|-------------|-----------|---------|
| 1   | 7.409      | MM R | 0.2758   | 852.04376   | 51.48931  | 11.8579 |
| 2   | 10.874     | MM R | 0.6606   | 6333.42871  | 159.77948 | 88.1421 |

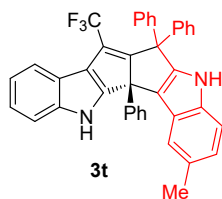

### HPLC spectrum of the racemate

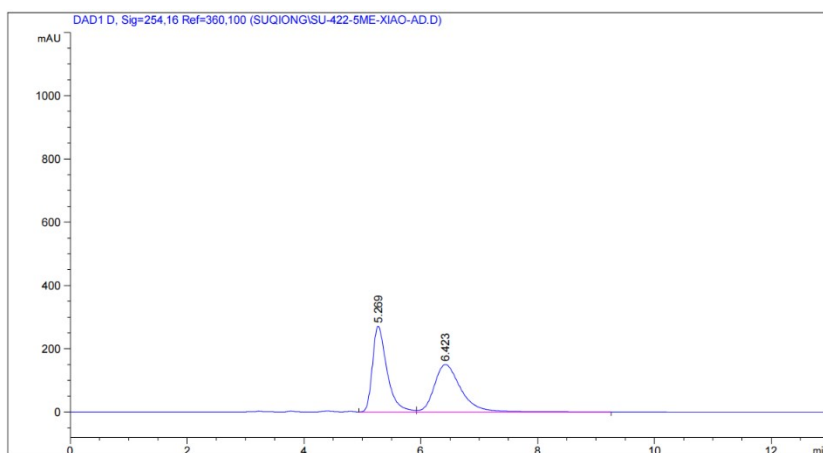

信号 1: DAD1 D, Sig=254,16 Ref=360,100

| 峰 # | 保留时间 [min] | 类型 | 峰宽 [min] | 峰面积 [mAU*s] | 峰高 [mAU]  | 峰面积 %   |
|-----|------------|----|----------|-------------|-----------|---------|
| 1   | 5.269      | BV | 0.2580   | 4690.27490  | 270.89209 | 49.6087 |
| 2   | 6.423      | VB | 0.4830   | 4764.27002  | 149.83893 | 50.3913 |

### HPLC spectrum of the enantioenriched compound

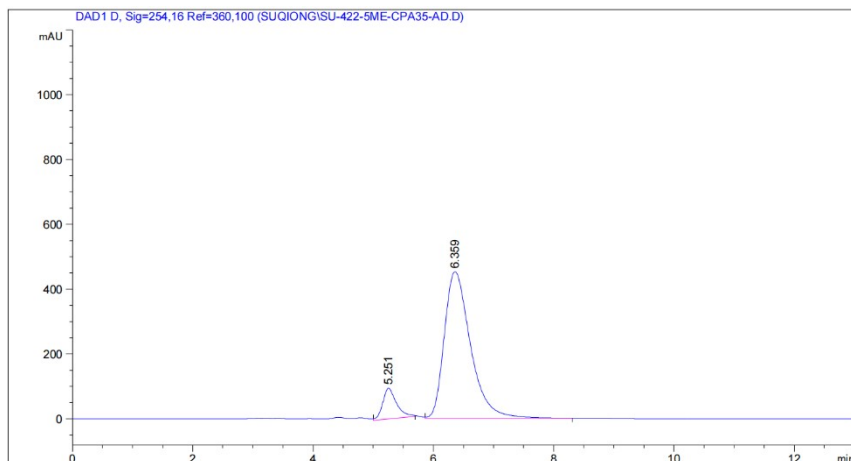

信号 1: DAD1 D, Sig=254,16 Ref=360,100

| 峰 # | 保留时间 [min] | 类型   | 峰宽 [min] | 峰面积 [mAU*s] | 峰高 [mAU]  | 峰面积 %   |
|-----|------------|------|----------|-------------|-----------|---------|
| 1   | 5.251      | MM R | 0.2626   | 1501.28455  | 95.28012  | 9.8098  |
| 2   | 6.359      | VB   | 0.4651   | 1.38026e4   | 453.45667 | 90.1902 |

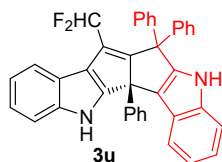

### HPLC spectrum of the racemate

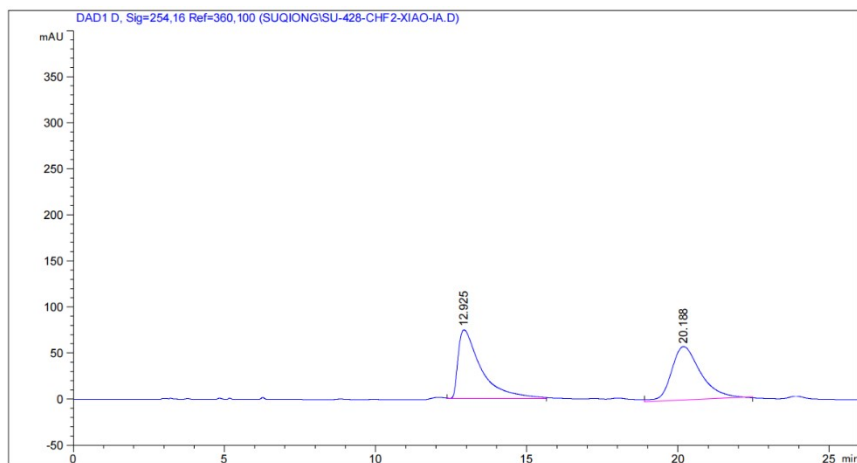

信号 1: DAD1 D, Sig=254,16 Ref=360,100

| 峰 # | 保留时间 [min] | 类型   | 峰宽 [min] | 峰面积 [mAU*s] | 峰高 [mAU] | 峰面积 %   |
|-----|------------|------|----------|-------------|----------|---------|
| 1   | 12.925     | MM R | 0.8833   | 3953.15259  | 74.58946 | 50.4189 |
| 2   | 20.188     | MM R | 1.1170   | 3887.46729  | 58.00404 | 49.5811 |

### HPLC spectrum of the enantioenriched compound

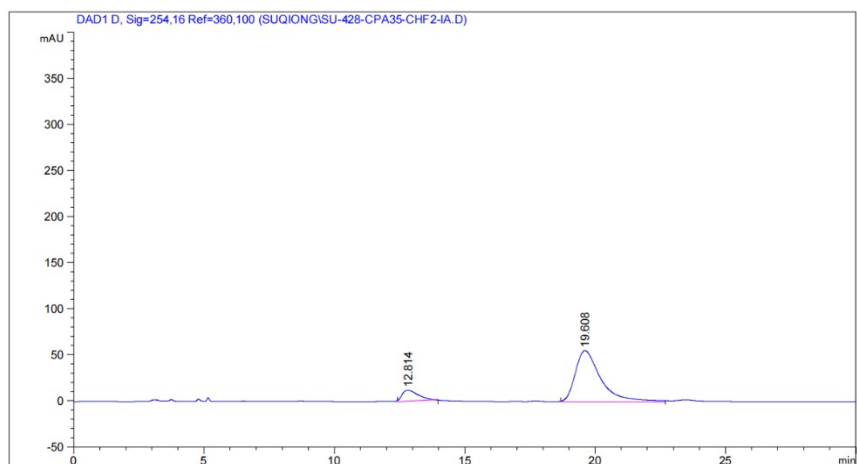

信号 1: DAD1 D, Sig=254,16 Ref=360,100

| 峰 # | 保留时间 [min] | 类型   | 峰宽 [min] | 峰面积 [mAU*s] | 峰高 [mAU] | 峰面积 %   |
|-----|------------|------|----------|-------------|----------|---------|
| 1   | 12.814     | MM R | 0.7029   | 503.55838   | 11.94076 | 11.8567 |
| 2   | 19.608     | MM R | 1.1273   | 3743.47485  | 55.34687 | 88.1433 |

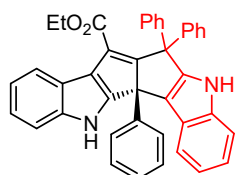

3v

### HPLC spectrum of the racemate

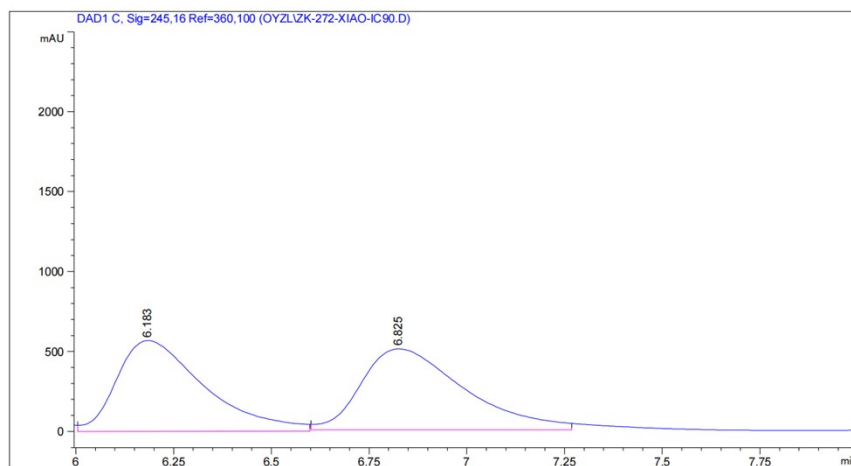

信号 1: DAD1 C, Sig=245,16 Ref=360,100

| 峰 # | 保留时间 [min] | 类型   | 峰宽 [min] | 峰面积 [mAU*s] | 峰高 [mAU]  | 峰面积 %   |
|-----|------------|------|----------|-------------|-----------|---------|
| 1   | 6.183      | VV   | 0.2336   | 8826.76270  | 566.92938 | 48.8329 |
| 2   | 6.825      | MM R | 0.3052   | 9248.69238  | 505.00375 | 51.1671 |

### HPLC spectrum of the enantioenriched compound

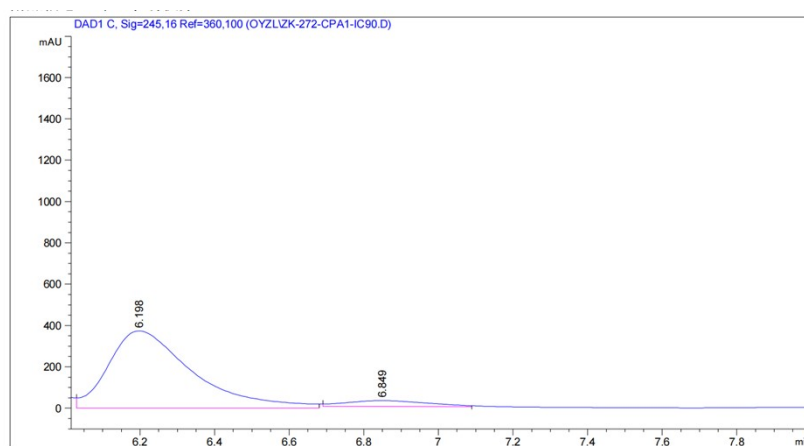

信号 1: DAD1 C, Sig=245,16 Ref=360,100

| 峰 # | 保留时间 [min] | 类型   | 峰宽 [min] | 峰面积 [mAU*s] | 峰高 [mAU]  | 峰面积 %   |
|-----|------------|------|----------|-------------|-----------|---------|
| 1   | 6.198      | VV   | 0.2313   | 5810.36182  | 373.91232 | 93.0082 |
| 2   | 6.849      | MM R | 0.2564   | 436.78491   | 28.39303  | 6.9918  |

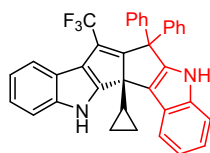

3w

### HPLC spectrum of the racemate

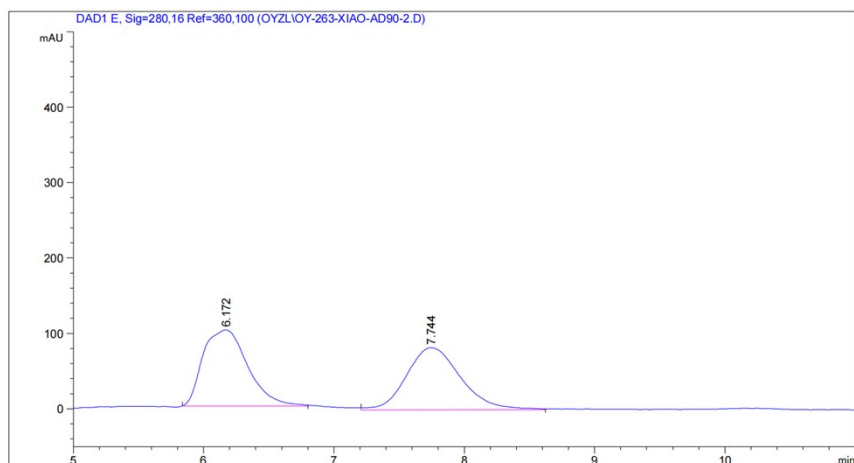

信号 1: DAD1 E, Sig=280,16 Ref=360,100

| 峰 # | 保留时间 [min] | 类型   | 峰宽 [min] | 峰面积 [mAU*s] | 峰高 [mAU]  | 峰面积 %   |
|-----|------------|------|----------|-------------|-----------|---------|
| 1   | 6.172      | MM R | 0.3981   | 2412.56885  | 101.00908 | 50.5102 |
| 2   | 7.744      | MM R | 0.4794   | 2363.83374  | 82.17830  | 49.4898 |

### HPLC spectrum of the enantioenriched compound

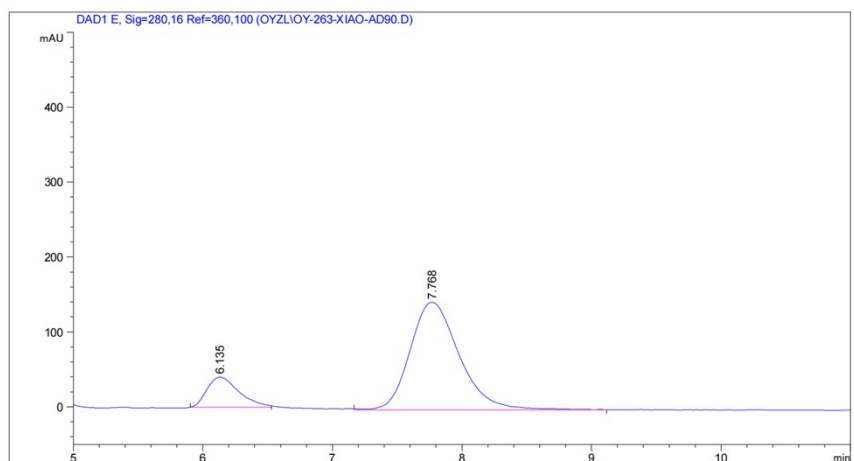

信号 1: DAD1 E, Sig=280,16 Ref=360,100

| 峰 # | 保留时间 [min] | 类型   | 峰宽 [min] | 峰面积 [mAU*s] | 峰高 [mAU]  | 峰面积 %   |
|-----|------------|------|----------|-------------|-----------|---------|
| 1   | 6.135      | MM R | 0.2849   | 683.05865   | 39.96221  | 15.2682 |
| 2   | 7.768      | MM R | 0.4393   | 3790.68433  | 143.81737 | 84.7318 |



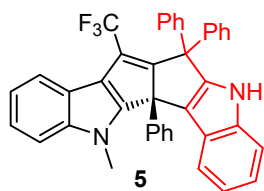

### HPLC spectrum of the racemate

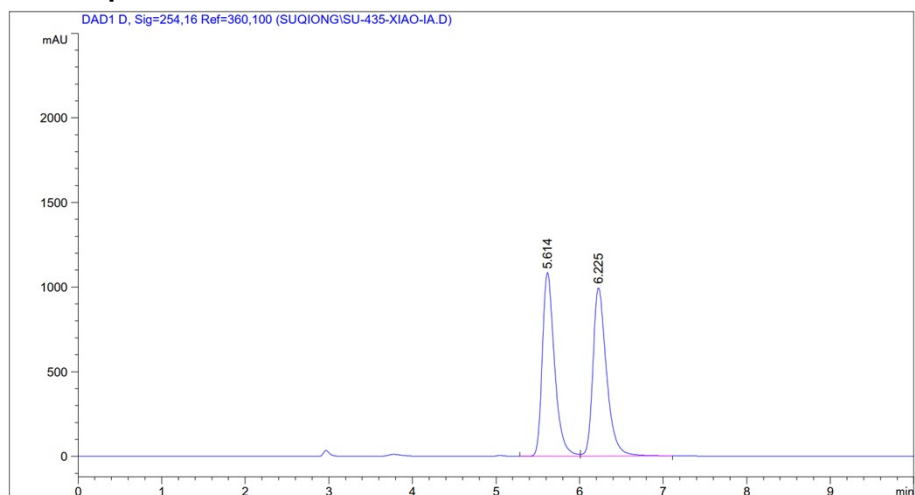

信号 1: DAD1 D, Sig=254,16 Ref=360,100

| 峰 # | 保留时间 [min] | 类型 | 峰宽 [min] | 峰面积 [mAU*s] | 峰高 [mAU]   | 峰面积 %   |
|-----|------------|----|----------|-------------|------------|---------|
| 1   | 5.614      | BV | 0.1543   | 1.09990e4   | 1084.57617 | 49.4625 |
| 2   | 6.225      | VB | 0.1698   | 1.12380e4   | 994.77118  | 50.5375 |

### HPLC spectrum of the enantioenriched compound

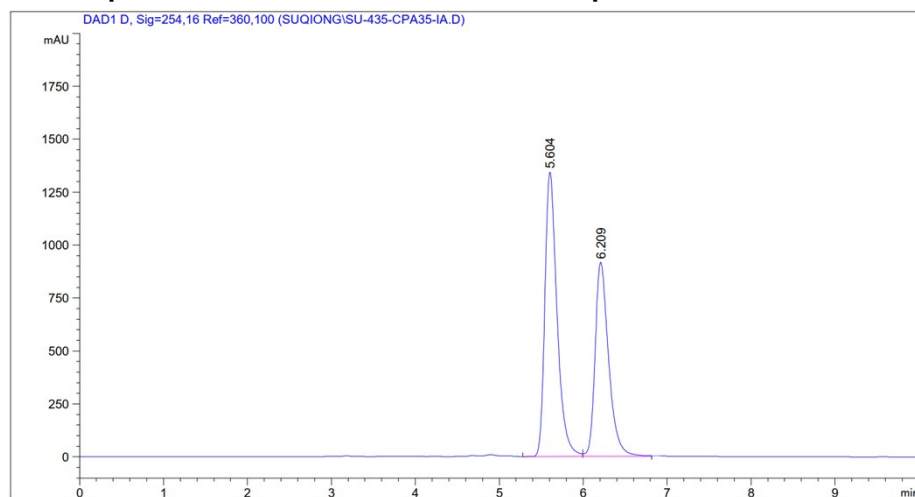

信号 1: DAD1 D, Sig=254,16 Ref=360,100

| 峰 # | 保留时间 [min] | 类型 | 峰宽 [min] | 峰面积 [mAU*s] | 峰高 [mAU]   | 峰面积 %   |
|-----|------------|----|----------|-------------|------------|---------|
| 1   | 5.604      | BV | 0.1535   | 1.35301e4   | 1343.29504 | 56.8611 |
| 2   | 6.209      | VV | 0.1706   | 1.02649e4   | 916.80322  | 43.1389 |

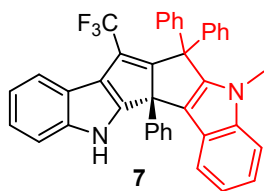

### HPLC spectrum of the racemate

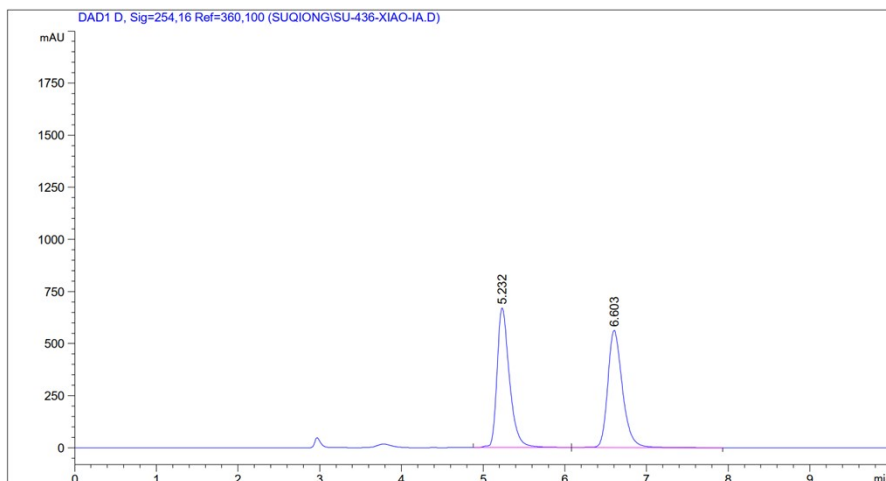

信号 1: DAD1 D, Sig=254,16 Ref=360,100

| 峰 # | 保留时间 [min] | 类型 | 峰宽 [min] | 峰面积 [mAU*s] | 峰高 [mAU]  | 峰面积 %   |
|-----|------------|----|----------|-------------|-----------|---------|
| 1   | 5.232      | VB | 0.1612   | 7081.91406  | 670.38788 | 50.1964 |
| 2   | 6.603      | BB | 0.1899   | 7026.48779  | 562.03778 | 49.8036 |

### HPLC spectrum of the enantioenriched compound

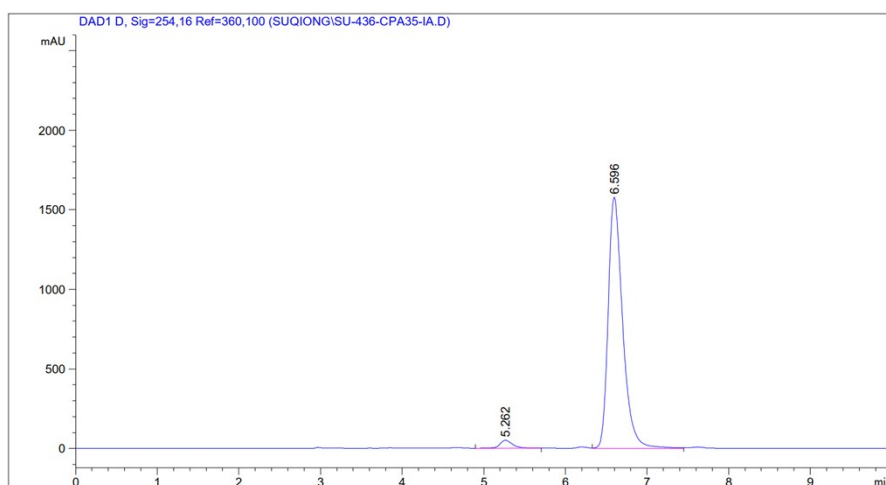

信号 1: DAD1 D, Sig=254,16 Ref=360,100

| 峰 # | 保留时间 [min] | 类型 | 峰宽 [min] | 峰面积 [mAU*s] | 峰高 [mAU]   | 峰面积 %   |
|-----|------------|----|----------|-------------|------------|---------|
| 1   | 5.262      | BB | 0.1587   | 522.68707   | 49.71313   | 2.6219  |
| 2   | 6.596      | VV | 0.1875   | 1.94128e4   | 1578.03247 | 97.3781 |

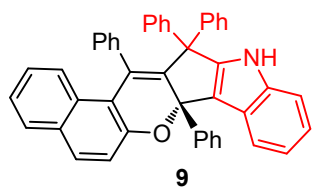

### HPLC spectrum of the racemate

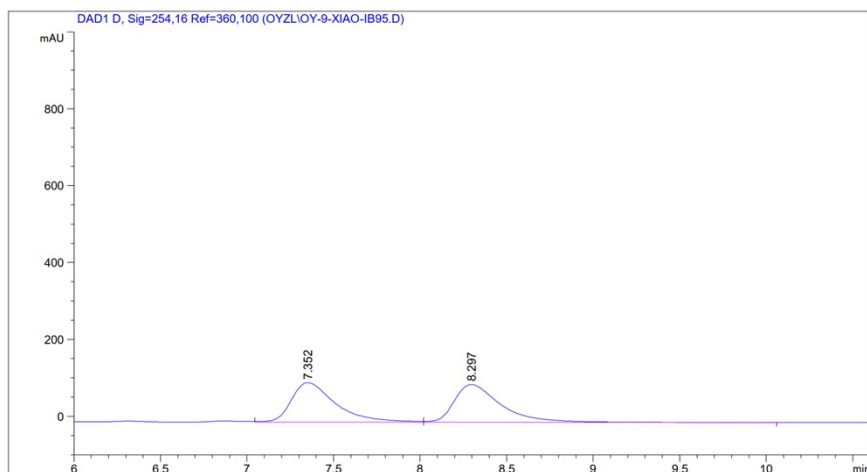

信号 1: DAD1 D, Sig=254,16 Ref=360,100

| 峰 # | 保留时间 [min] | 类型 | 峰宽 [min] | 峰面积 [mAU*s] | 峰高 [mAU]  | 峰面积 %   |
|-----|------------|----|----------|-------------|-----------|---------|
| 1   | 7.352      | VV | 0.2662   | 1835.54102  | 102.84097 | 49.7955 |
| 2   | 8.297      | VB | 0.2821   | 1850.61877  | 98.11518  | 50.2045 |

### HPLC spectrum of the enantioenriched compound

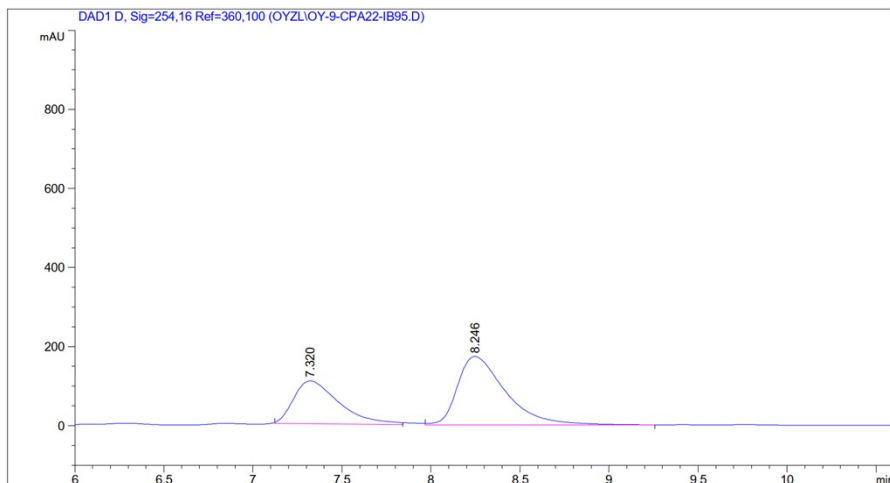

信号 1: DAD1 D, Sig=254,16 Ref=360,100

| 峰 # | 保留时间 [min] | 类型   | 峰宽 [min] | 峰面积 [mAU*s] | 峰高 [mAU]  | 峰面积 %   |
|-----|------------|------|----------|-------------|-----------|---------|
| 1   | 7.320      | MM R | 0.2942   | 1915.77283  | 108.51183 | 37.2603 |
| 2   | 8.246      | VB   | 0.2815   | 3225.82251  | 173.03253 | 62.7397 |

## 9. Plausible reaction mechanism

### a) substitution procedure: excellent regioselectivity

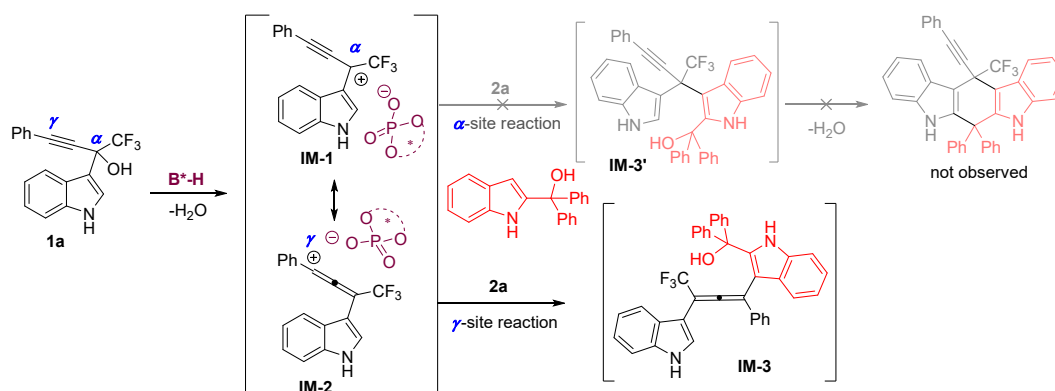

### b) bicyclization procedure: excellent chemoselectivity

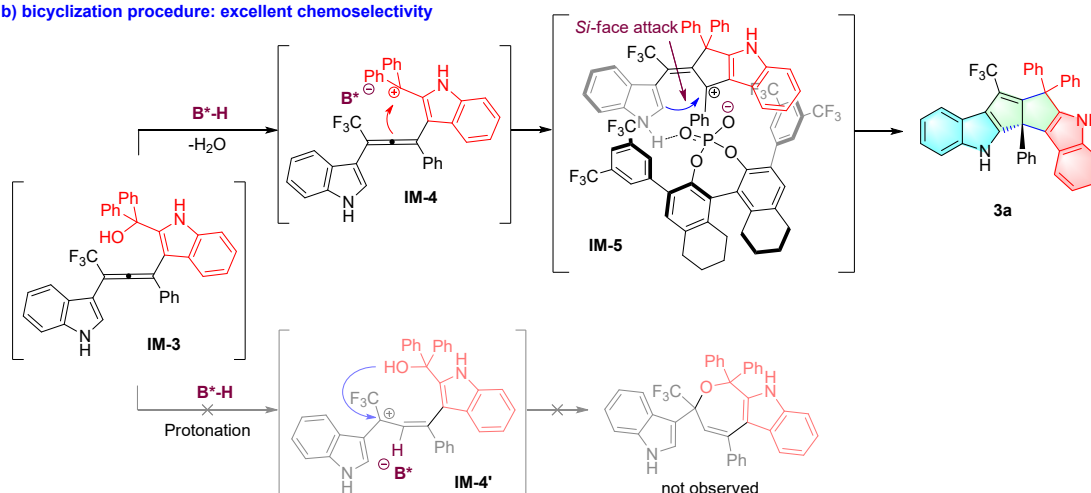

**Fig. S1** Plausible reaction mechanism.

As shown in **Fig. S1a**, the excellent regioselectivity results from the nucleophilic substitution procedure of **1a** and **2a**. The dehydration of **1a** to form carbonium ion might occur at either  $\alpha$ - or  $\gamma$ -position due to the influence of spatial steric hindrance and electronegativity. 2-indolylmethanol **2a**, as a sterically hindered nucleophilic reagent, tends to attack the less hindered  $\gamma$ -position of **1a**, resulting in the formation of allene intermediate **IM-3**.

As shown in **Fig. S1b**, the excellent chemoselectivity arises from further cyclization process of allene intermediate **IM-3**. We hypothesize that the preferential formation of intermediate **IM-4** is due to intramolecular dehydration occurring at a faster rate than its intermolecular protonation. **IM-4** then undergoes the first intramolecular cyclization to give intermediate **IM-5**. Subsequently, **IM-5** performs the second cyclization to give the desired product **3a** in the presence of catalyst (*R*)-**C1**. During the cyclization of intermediate **IM-5**, the activated C2 position of indole group attacks the indolyl benzylic cation (*Si*-face). Chiral phosphoric acid catalyst (*R*)-**C1** exerts efficient chiral induction through ion-pair and hydrogen-bonding with the corresponding carbocation and the N-H moiety in indole simultaneously, to deliver the desired cyclization product **3a** with excellent enantioselectivity.

## 10. Results of DFT Calculations

### a. Computational Details

All reaction mechanisms were calculated with Gaussian 16 package (G16 A.03)<sup>1</sup>. Geometry optimization and frequency calculations were performed at the B3LYP-D3(BJ)/6-31G(d,p) level with PCM implicit solvent model (dichloromethane,  $\epsilon=8.93$ )<sup>2-4</sup>. Beryn algorithm was used to search transition-state structures. Transition-state structures were verified with IRC calculations. In all single point calculations, M06-2X-D3/6-311+G(d,p) level was used for all structure with SMD implicit solvent model (dichloromethane,  $\epsilon=8.93$ ) and Gibbs free energy correction was applied<sup>5-6</sup>.

### b. Computational Results

As shown in **Fig. S2**, both  $\gamma$ -site and  $\alpha$ -site reactions of **IM-2** have favorable energy barrier (13.3 and 11.6 kcal/mol). However, the  $\gamma$ -site reaction is more exothermic (-12.7 kcal/mol) than  $\alpha$ -site reaction (-2.1 kcal/mol), which means **IM-3** intermediate was thermodynamically favorable compared with **IM-3'** intermediate. Therefore, according to thermodynamic stability of products **IM-3** and **IM-3'**,  $\gamma$ -site reaction pathway could be more advantageous than  $\alpha$ -site reaction pathway.

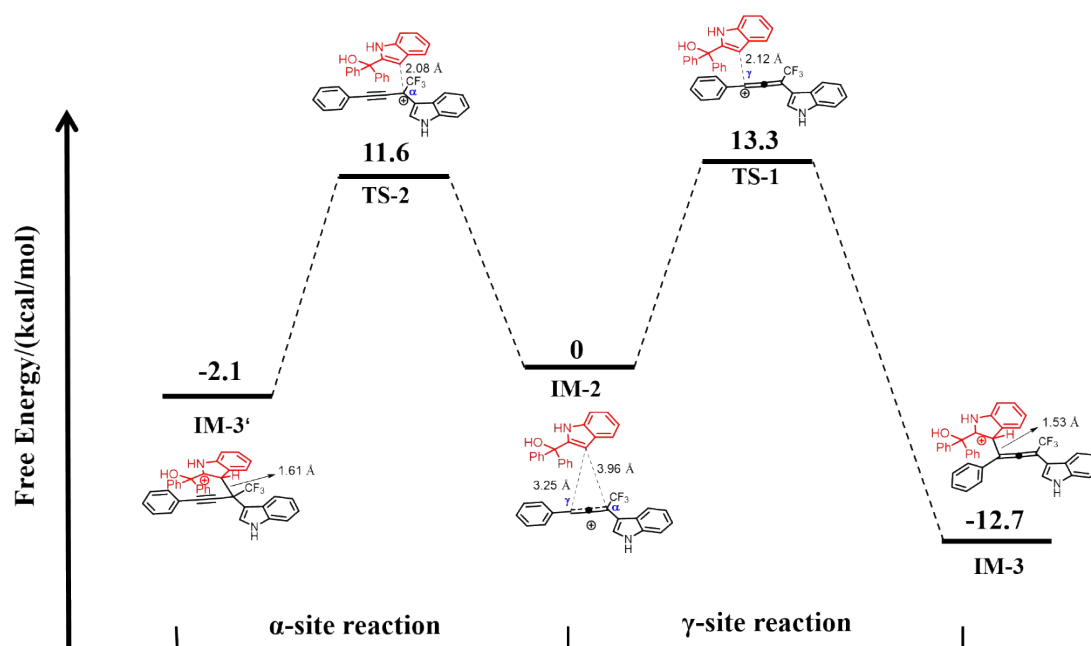

**Fig. S2.** Reaction energy profile of  $\alpha$ -site reaction and  $\gamma$ -site reaction for **IM-2** intermediate.

Regarding the chemoselectivity of **IM-3** (**Fig. S3**), the energy barrier of protonation reaction is 16.1 kcal/mol, which is slightly higher than the dehydration reaction (13.3 kcal/mol) with similar endothermicity (5.0 and 5.5 kcal/mol). In terms of reaction energy barrier, the dehydration reaction is more slightly advantageous. Also, the reactant energy of the protonation reaction is approximately 5.8 kcal/mol higher than that of the dehydration reaction. Therefore, both the transition state and the product energies are

overall higher than those of the dehydration reaction. Furthermore, based on the distinction in the final products, the conformations of **IM-3** dehydration reaction (**IM-3** conformation 1) and protonation reaction (**IM-3** conformation 2) are likely different.

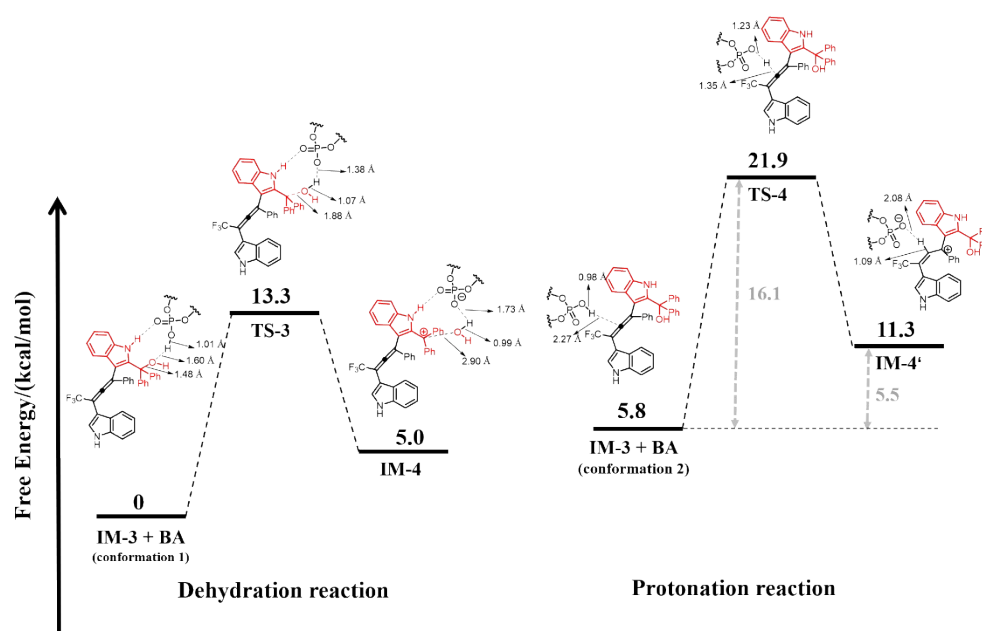

**Fig. S3.** Reaction energy profile of dehydration and protonation energy for **IM-3** intermediate.

As can be seen in **Fig. S4**, in **IM-3** conformation 1, the hydroxyl group needs to be on the same side as the amino group of indole, which is beneficial for the binding to CPA, leading to subsequent dehydration reaction. In **IM-3** conformation 2, the hydroxyl needs to attack allene carbon, leading to the hydroxyl group and the indole amino group not being on the same side. Energy calculations for both conformations reveal that the energy of **IM-3** conformation 2 is approximately 5.0 kcal/mol higher than that of **IM-3** conformation 1. Therefore, **IM-3** conformation 1 is more advantageous. In conclusion, through the comparison of reaction energy profiles and conformation analysis, **IM-3** is more conducive to undergoing dehydration reaction to yield **IM-5**.

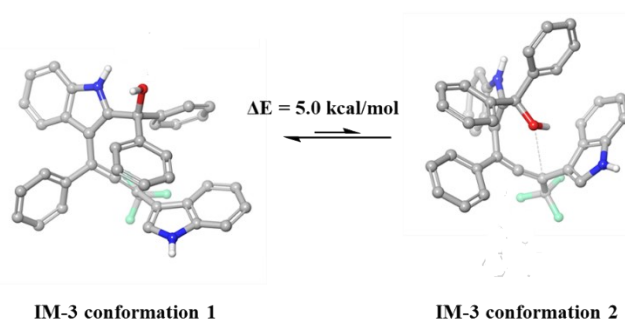

**Fig. S4.** Two conformations of **IM-3** intermediate. **IM-3** conformations 1 and 2 are separately pre-reaction conformations of dehydration and protonation reaction. The energy of conformation 2 is about 5.0 kcal/mol higher than conformation 1.

### c. References

- [1] Frisch, M. J.; Trucks, G. W.; Schlegel, H. B.; Scuseria, G. E.; Robb, M. A.; Cheeseman, J. R.; Scalmani, G.; Barone, V.; Petersson, G. A.; Nakatsuji, H.; Li, X.; Caricato, M.; Marenich, A. V.; Bloino, J.; Janesko, B. G.; Gomperts, R.; Mennucci, B.; Hratchian, H. P.; Ortiz, J. V.; Izmaylov, A. F.; Sonnenberg, J. L.; Williams-Young, D.; Ding, F.; Lipparini, F.; Egidi, F.; Goings, J.; Peng, B.; Petrone, A.; Henderson, T.; Ranasinghe, D.; Zakrzewski, V. G.; Gao, J.; Rega, N.; Zheng, G.; Liang, W.; Hada, M.; Ehara, M.; Toyota, K.; Fukuda, R.; Hasegawa, J.; Ishida, M.; Nakajima, T.; Honda, Y.; Kitao, O.; Nakai, H.; Vreven, T.; Throssell, K.; Montgomery, J. A., Jr.; Peralta, J. E.; Ogliaro, F.; Bearpark, M. J.; Heyd, J. J.; Brothers, E. N.; Kudin, K. N.; Staroverov, V. N.; Keith, T. A.; Kobayashi, R.; Normand, J.; Raghavachari, K.; Rendell, A. P.; Burant, J. C.; Iyengar, S. S.; Tomasi, J.; Cossi, M.; Millam, J. M.; Klene, M.; Adamo, C.; Cammi, R.; Ochterski, J. W.; Martin, R. L.; Morokuma, K.; Farkas, O.; Foresman, J. B.; Fox, D. J., GAUSSIAN16. Revision A. 03. Wallingford, CT: Gaussian Inc. **2016**.
- [2] Terada, M.; Komuro, T.; Toda, Y.; Korenaga, T., *J. Am. Chem. Soc.*, **2014**, *136* (19), 7044-7057.
- [3] Ding, W.-Y.; Yu, P.; An, Q.-J.; Bay, K. L.; Xiang, S.-H.; Li, S.; Chen, Y.; Houk, K. N.; Tan, B., *Chem.*, **2020**, *6* (8), 2046-2059.
- [4] Duan, M.; Diaz-Oviedo, C. D.; Zhou, Y.; Chen, X.; Yu, P.; List, B.; Houk, K. N.; Lan, Y., *Angew. Chem. Int. Ed.*, **2022**, *61* (9), e202113204.
- [5] Wang, J.; Zheng, S.; Rajkumar, S.; Xie, J.; Yu, N.; Peng, Q.; Yang, X., *Nat. Commun.*, **2020**, *11* (1), 5527-5534.
- [6] Varlet, T.; Maticic, M.; Van Elslande, E.; Neuville, L.; Gandon, V.; Masson, G., *J. Am. Chem. Soc.*, **2021**, *143* (30), 11611-11619.

### d. The cartesian coordinates of optimized structures

#### $\gamma$ -site and $\alpha$ -site reaction

##### IM-2

|   |             |             |             |
|---|-------------|-------------|-------------|
| F | 0.95761100  | -2.62640500 | -1.79355100 |
| F | 3.12609600  | -2.59927600 | -1.89629800 |
| F | 1.99399000  | -0.77371300 | -2.26842300 |
| N | 4.54097900  | -0.13962100 | 2.15683600  |
| H | 4.86487500  | 0.11057200  | 3.08388000  |
| N | -3.46008800 | -0.03919500 | -0.23176100 |
| H | -4.11949300 | 0.37208500  | 0.41071700  |
| C | 2.04586900  | -1.89638800 | -1.51636100 |
| C | 4.48881600  | -0.42602500 | -0.10129700 |
| C | 3.36690500  | -0.68966500 | 1.90253400  |
| H | 2.66072500  | -0.93325700 | 2.68183600  |
| C | 2.11420100  | -1.52619700 | -0.03861700 |
| C | -1.29799500 | -1.97474000 | 2.00464100  |
| C | 5.27026400  | 0.06486100  | 0.97040800  |
| C | 3.24792300  | -0.93026300 | 0.49404500  |
| C | -0.23783600 | 1.82168900  | 0.44266500  |
| C | -2.40215000 | -1.46241500 | -1.62333400 |
| C | -2.28841000 | -2.62407100 | -2.40745900 |

|   |             |             |             |
|---|-------------|-------------|-------------|
| H | -1.35507800 | -2.85651100 | -2.90938500 |
| C | -1.49098600 | -0.42019400 | -1.24350600 |
| C | -2.38139100 | -2.71846400 | 1.49027200  |
| H | -2.26665800 | -3.25304500 | 0.55598300  |
| C | -0.08793000 | -1.89269100 | 1.29667900  |
| C | 1.79387800  | 2.06378800  | 1.74541700  |
| H | 2.27901300  | 2.11207100  | 2.71526800  |
| C | -2.34702300 | 2.93478900  | -0.28485300 |
| C | 4.98376300  | -0.28780000 | -1.40126300 |
| H | 4.42357500  | -0.62645300 | -2.26038600 |
| C | 0.41362000  | 1.85008300  | 1.67646400  |
| H | -0.16327000 | 1.74638300  | 2.58743500  |
| C | -1.43951200 | -1.26299900 | 3.22163900  |
| H | -0.59472800 | -0.70632400 | 3.61266300  |
| C | -2.75529000 | 2.95621400  | -1.61985700 |
| H | -2.69829000 | 2.05080800  | -2.21466100 |
| C | 0.97502400  | -1.76879200 | 0.70288100  |
| C | -2.16284600 | 0.41884200  | -0.38451800 |
| C | 0.51791800  | 1.99918200  | -0.72544000 |
| H | 0.02191900  | 2.01010600  | -1.68969800 |
| C | -1.76423400 | 1.67076000  | 0.36173400  |
| C | -3.23788800 | 4.13656400  | -2.19027300 |
| H | -3.55430000 | 4.14015200  | -3.22872600 |
| C | -3.63677600 | -1.19314600 | -0.96300400 |
| C | -2.65566600 | -1.28133700 | 3.88987300  |
| H | -2.77258800 | -0.72879600 | 4.81548400  |
| C | -3.72976100 | -2.01562400 | 3.36803400  |
| H | -4.67852800 | -2.02498000 | 3.89394800  |
| C | 6.51214900  | 0.66057600  | 0.81171400  |
| H | 7.08108000  | 1.02551600  | 1.65919900  |
| C | 1.89557500  | 2.19469300  | -0.65908800 |
| H | 2.46565100  | 2.32403500  | -1.57320600 |
| C | -3.58781500 | -2.73536300 | 2.17961300  |
| H | -4.42379700 | -3.29514800 | 1.77662200  |
| C | -2.42283700 | 4.10802000  | 0.47529800  |
| H | -2.10210500 | 4.09183400  | 1.51076600  |
| C | 2.53833800  | 2.24215300  | 0.57932400  |
| H | 3.60707400  | 2.42005500  | 0.63169100  |
| C | -3.31852800 | 5.30156700  | -1.42878200 |
| H | -3.69615900 | 6.21816800  | -1.87104100 |
| C | 6.23259700  | 0.31063500  | -1.58026000 |
| H | 6.62348800  | 0.42001700  | -2.58575400 |
| C | -4.59929800 | -3.18056400 | -1.85552600 |
| H | -5.43706300 | -3.86265500 | -1.96043600 |



|   |             |             |             |
|---|-------------|-------------|-------------|
| C | -4.74390400 | -2.03969400 | -1.07413500 |
| H | -5.67404500 | -1.82068300 | -0.55987400 |
| C | -2.90992400 | 5.28313000  | -0.09228900 |
| H | -2.96884100 | 6.18641400  | 0.50723300  |
| C | -3.38443300 | -3.47103000 | -2.51369200 |
| H | -3.30980100 | -4.37354000 | -3.11215200 |
| C | 6.98851800  | 0.77463800  | -0.49615300 |
| H | 7.95422900  | 1.23481600  | -0.67206500 |
| O | -2.35761600 | 1.60687500  | 1.66988300  |
| H | -2.12014000 | 0.75327100  | 2.06500900  |
| H | -0.46888600 | -0.31198000 | -1.56165900 |

**TS-1**

|   |             |             |             |
|---|-------------|-------------|-------------|
| F | -1.37156200 | 3.37768100  | -1.42783000 |
| F | -3.50965600 | 2.99637500  | -1.30703000 |
| F | -2.21891400 | 1.63840300  | -2.41913800 |
| N | -4.26149100 | -0.33802300 | 2.07049400  |
| H | -4.51538500 | -0.70778800 | 2.97519400  |
| N | 3.36973100  | 0.14070400  | -0.20094900 |
| H | 4.11963300  | -0.29701800 | 0.32096400  |
| C | -2.30084300 | 2.41158100  | -1.30559500 |
| C | -4.34314200 | 0.23451400  | -0.12261400 |
| C | -3.14095200 | 0.36855500  | 1.81737600  |
| H | -2.42514200 | 0.59521300  | 2.59229900  |
| C | -2.07046300 | 1.55839700  | -0.07241900 |
| C | 1.38361500  | 1.74759900  | 1.74467600  |
| C | -5.02242500 | -0.46209500 | 0.91113000  |
| C | -3.12810700 | 0.76794700  | 0.47535300  |
| C | 0.41133300  | -2.03205300 | 0.57418200  |
| C | 2.15294700  | 1.61184700  | -1.40883400 |
| C | 1.91756700  | 2.79031300  | -2.12226500 |
| H | 0.92756000  | 3.01886300  | -2.49987200 |
| C | 1.28614100  | 0.53599000  | -0.94060600 |
| C | 2.34750600  | 2.75791500  | 1.59793500  |
| H | 2.33552200  | 3.38907300  | 0.71838000  |
| C | 0.39434300  | 1.47805100  | 0.73311900  |
| C | -1.42598900 | -2.60874300 | 2.04379000  |
| H | -1.79058600 | -2.82117800 | 3.04381700  |
| C | 2.47720100  | -2.85827100 | -0.55624400 |
| C | -4.89349500 | 0.22221600  | -1.41301100 |
| H | -4.39909400 | 0.71985400  | -2.23645400 |
| C | -0.07729500 | -2.29635400 | 1.85491000  |
| H | 0.59843100  | -2.29711300 | 2.70185900  |
| C | 1.38128500  | 0.94741100  | 2.90737800  |

|   |             |             |             |
|---|-------------|-------------|-------------|
| H | 0.60840400  | 0.19508100  | 3.02696500  |
| C | 2.73296000  | -2.65567800 | -1.91384400 |
| H | 2.56823600  | -1.68322800 | -2.36653000 |
| C | -0.82986700 | 1.56633600  | 0.44118200  |
| C | 2.14086900  | -0.39229200 | -0.27688100 |
| C | -0.46453500 | -2.10009600 | -0.51741900 |
| H | -0.08891100 | -1.95605000 | -1.52465300 |
| C | 1.90230100  | -1.75497100 | 0.34271300  |
| C | 3.20743700  | -3.70610100 | -2.70302000 |
| H | 3.40378800  | -3.53787200 | -3.75697700 |
| C | 3.44210800  | 1.35775500  | -0.89108400 |
| C | 2.34274600  | 1.14653800  | 3.89238200  |
| H | 2.33359200  | 0.53323600  | 4.78722800  |
| C | 3.31265900  | 2.14290700  | 3.73051700  |
| H | 4.06447800  | 2.29459300  | 4.49774200  |
| C | -6.22181900 | -1.14185900 | 0.70936000  |
| H | -6.71680000 | -1.66538300 | 1.52021300  |
| C | -1.81133700 | -2.39752900 | -0.32685200 |
| H | -2.48091500 | -2.43534100 | -1.17950200 |
| C | 3.30507400  | 2.94981200  | 2.59258600  |
| H | 4.04738200  | 3.73185300  | 2.47479500  |
| C | 2.69694800  | -4.11981600 | 0.00835600  |
| H | 2.49198300  | -4.27516200 | 1.06137500  |
| C | -2.29514100 | -2.65955300 | 0.95595100  |
| H | -3.34243100 | -2.89962100 | 1.10116300  |
| C | 3.43296500  | -4.95981000 | -2.13765400 |
| H | 3.80481400  | -5.77504700 | -2.74993900 |
| C | -6.09169800 | -0.45344200 | -1.62331600 |
| H | -6.52552700 | -0.46549500 | -2.61768300 |
| C | 4.26223800  | 3.38812100  | -1.79344100 |
| H | 5.06833500  | 4.09484000  | -1.95787900 |
| C | 4.51487100  | 2.22498300  | -1.06754800 |
| H | 5.49385600  | 2.01285700  | -0.65341000 |
| C | 3.17786400  | -5.16307600 | -0.77849100 |
| H | 3.35070200  | -6.13714800 | -0.33195600 |
| C | 2.98421100  | 3.66712800  | -2.31181500 |
| H | 2.82802700  | 4.58573300  | -2.86699200 |
| C | -6.75101600 | -1.12449000 | -0.57796800 |
| H | -7.68290000 | -1.64245700 | -0.77794100 |
| O | 2.66497900  | -1.80210200 | 1.55319600  |
| H | 2.36133400  | -1.08555100 | 2.13484400  |
| H | 0.35090900  | 0.25804100  | -1.39533300 |

IM-3

|   |             |             |             |
|---|-------------|-------------|-------------|
| F | 2.08361700  | -3.62299000 | -0.68869400 |
| F | 3.96109700  | -3.13845000 | 0.30065600  |
| F | 3.57282300  | -2.40293300 | -1.70491000 |
| N | 4.37771900  | 1.28704000  | 1.60191100  |
| H | 4.72163100  | 1.80031300  | 2.39836300  |
| N | -3.31790900 | -0.54825100 | -0.95302700 |
| H | -4.20682600 | -0.05143600 | -0.93990700 |
| C | 2.99830700  | -2.64499900 | -0.50284200 |
| C | 4.01405800  | 0.58686700  | -0.51639100 |
| C | 3.52781900  | 0.21139800  | 1.66690400  |
| H | 3.17147600  | -0.16349100 | 2.61456000  |
| C | 2.38923300  | -1.38820400 | 0.07546800  |
| C | -0.81128200 | -1.55756400 | 1.82274900  |
| C | 4.68967400  | 1.55141400  | 0.28199000  |
| C | 3.28185100  | -0.25924100 | 0.39519300  |
| C | -0.80300400 | 1.88046300  | 0.38501200  |
| C | -1.79332000 | -2.18408300 | -1.33021900 |
| C | -1.33366000 | -3.42508100 | -1.74125900 |
| H | -0.29322700 | -3.70189500 | -1.61482700 |
| C | -1.08430700 | -1.00210300 | -0.70721000 |
| C | -1.98367000 | -2.31782200 | 1.96145600  |
| H | -2.43581300 | -2.78698300 | 1.09535900  |
| C | -0.19511500 | -1.30722800 | 0.49513600  |
| C | 0.97181400  | 2.87531700  | 1.69513100  |
| H | 1.35798800  | 3.18904400  | 2.65948400  |
| C | -3.17781200 | 2.29965900  | -0.31006000 |
| C | 4.12464000  | 0.66038200  | -1.91475200 |
| H | 3.61710100  | -0.06316000 | -2.54231100 |
| C | -0.29425300 | 2.29156600  | 1.61833700  |
| H | -0.88714400 | 2.17173600  | 2.51693700  |
| C | -0.23419700 | -0.97346500 | 2.96342700  |
| H | 0.65088100  | -0.35754800 | 2.84748400  |
| C | -3.29521100 | 2.45412900  | -1.69655400 |
| H | -2.74457300 | 1.81106400  | -2.37580500 |
| C | 1.10020000  | -1.35248900 | 0.30423300  |
| C | -2.22071400 | -0.03378400 | -0.47125200 |
| C | -0.04039000 | 2.07823600  | -0.77268300 |
| H | -0.43376900 | 1.80162300  | -1.74563500 |
| C | -2.21044900 | 1.28247100  | 0.30079800  |
| C | -4.12899400 | 3.43944400  | -2.22539200 |
| H | -4.21423200 | 3.54724000  | -3.30157200 |
| C | -3.14299000 | -1.85330000 | -1.48486300 |
| C | -0.81631700 | -1.15207500 | 4.21793900  |
| H | -0.36631200 | -0.68866600 | 5.08961000  |

|   |             |             |             |
|---|-------------|-------------|-------------|
| C | -1.98096100 | -1.91104800 | 4.34768200  |
| H | -2.43812100 | -2.04373300 | 5.32245900  |
| C | 5.46935300  | 2.56887500  | -0.27640900 |
| H | 5.97715200  | 3.29594800  | 0.34904400  |
| C | 1.22565800  | 2.65203200  | -0.69276900 |
| H | 1.81990700  | 2.77816000  | -1.59096500 |
| C | -2.56047100 | -2.49222000 | 3.21793900  |
| H | -3.46460300 | -3.08414000 | 3.31353500  |
| C | -3.89844600 | 3.14295600  | 0.54099700  |
| H | -3.80495700 | 3.02322100  | 1.61297900  |
| C | 1.73303600  | 3.05690000  | 0.54318000  |
| H | 2.71891800  | 3.50187000  | 0.60113200  |
| C | -4.84872400 | 4.27789600  | -1.37428200 |
| H | -5.49818000 | 5.04354200  | -1.78575300 |
| C | 4.89315300  | 1.67368900  | -2.47292100 |
| H | 4.98606200  | 1.74305900  | -3.55211400 |
| C | -3.60990500 | -3.95166500 | -2.45986500 |
| H | -4.30195700 | -4.65956800 | -2.90160400 |
| C | -4.08375200 | -2.70306600 | -2.04667700 |
| H | -5.12485500 | -2.42192800 | -2.15389300 |
| C | -4.73068400 | 4.12629300  | 0.00836900  |
| H | -5.28815600 | 4.77441500  | 0.67677300  |
| C | -2.26253500 | -4.30626600 | -2.30851500 |
| H | -1.93346400 | -5.28673600 | -2.63455800 |
| C | 5.55983700  | 2.61686500  | -1.66268900 |
| H | 6.15421300  | 3.39528200  | -2.13017700 |
| O | -2.72913100 | 0.92496100  | 1.57910200  |
| H | -2.06016500 | 0.40275500  | 2.05381900  |
| H | -0.44724800 | -0.52872300 | -1.46686200 |

## TS-2

|   |             |             |             |
|---|-------------|-------------|-------------|
| F | 1.48439500  | -2.34094600 | -2.42762600 |
| F | -0.10011400 | -1.46994100 | -3.61343100 |
| F | -0.59008400 | -2.81901800 | -1.98830000 |
| N | -2.05633600 | 2.18694700  | -2.15930800 |
| H | -2.22938200 | 3.17166900  | -2.29447800 |
| N | 1.47021100  | -0.59008100 | 1.83770500  |
| H | 1.82916900  | 0.00353700  | 2.57945100  |
| C | 0.24913900  | -1.82501100 | -2.36388400 |
| C | -2.36631700 | -0.04403100 | -1.90999300 |
| C | -0.84590400 | 1.65448800  | -1.87471400 |
| H | 0.03887900  | 2.26616000  | -1.82170400 |
| C | 0.18044900  | -0.58432800 | -1.43572400 |
| C | 3.78557200  | 1.10873800  | -0.71720900 |

|   |             |             |             |
|---|-------------|-------------|-------------|
| C | -3.02329800 | 1.19154000  | -2.16571800 |
| C | -0.96259500 | 0.27846700  | -1.70402000 |
| C | -0.79642400 | 1.88737000  | 1.34861500  |
| C | 1.12566700  | -2.40612700 | 0.54057500  |
| C | 1.43430400  | -3.67003600 | 0.03681500  |
| H | 0.72281900  | -4.22024300 | -0.56429800 |
| C | -0.03766400 | -1.49791900 | 0.41996900  |
| C | 4.88655200  | 0.27129000  | -0.45012100 |
| H | 4.76505300  | -0.80367800 | -0.51876900 |
| C | 2.52626600  | 0.53942600  | -1.04159400 |
| C | 0.35516500  | 3.82387200  | 0.44243000  |
| H | 1.28079600  | 4.31651700  | 0.16336200  |
| C | -1.99265800 | -0.14502500 | 2.44643000  |
| C | -3.14606000 | -1.21254400 | -1.85764600 |
| H | -2.69605200 | -2.17784000 | -1.67353600 |
| C | 0.38985300  | 2.53594400  | 0.96886300  |
| H | 1.34475700  | 2.04026000  | 1.09486700  |
| C | 3.93234300  | 2.50664400  | -0.62916700 |
| H | 3.08319900  | 3.14439100  | -0.84770100 |
| C | -2.95176300 | -0.38811600 | 1.45671700  |
| H | -2.79363500 | -0.03487400 | 0.44786400  |
| C | 1.44431900  | 0.05292500  | -1.30477200 |
| C | 0.22127900  | -0.46254600 | 1.41205400  |
| C | -2.01262800 | 2.56016200  | 1.20634500  |
| H | -2.93593300 | 2.09248300  | 1.52117700  |
| C | -0.67118900 | 0.55936400  | 2.11250700  |
| C | -4.12260700 | -1.07935000 | 1.76002400  |
| H | -4.85158300 | -1.25552400 | 0.97611800  |
| C | 2.08029600  | -1.75460800 | 1.34479400  |
| C | 5.16098100  | 3.05361600  | -0.27455900 |
| H | 5.27199800  | 4.13081500  | -0.20916200 |
| C | 6.24865000  | 2.21862400  | -0.00407100 |
| H | 7.20509500  | 2.64944900  | 0.27339600  |
| C | -4.40097100 | 1.29711800  | -2.35069200 |
| H | -4.87027900 | 2.25776700  | -2.53434100 |
| C | -2.04600500 | 3.84909000  | 0.66956100  |
| H | -2.99884700 | 4.35768000  | 0.56561700  |
| C | 6.10908200  | 0.83075700  | -0.09302500 |
| H | 6.95572400  | 0.18476800  | 0.11436000  |
| C | -2.21600700 | -0.61416100 | 3.74367300  |
| H | -1.46833800 | -0.44103100 | 4.50723400  |
| C | -0.86640300 | 4.48410900  | 0.28474100  |
| H | -0.89436800 | 5.48864400  | -0.12450200 |
| C | -4.34750400 | -1.53769400 | 3.05966500  |

|   |             |             |             |
|---|-------------|-------------|-------------|
| H | -5.25919400 | -2.07574900 | 3.29867800  |
| C | -4.52130700 | -1.11432200 | -2.04259600 |
| H | -5.12593000 | -2.01427800 | -2.00124300 |
| C | 3.63547400  | -3.51778100 | 1.08678200  |
| H | 4.60390700  | -3.96572200 | 1.28017200  |
| C | 3.33985400  | -2.26386900 | 1.62524900  |
| H | 4.04795100  | -1.72197300 | 2.24076200  |
| C | -3.39176100 | -1.30259600 | 4.04800100  |
| H | -3.55577900 | -1.65874900 | 5.06003600  |
| C | 2.68889600  | -4.21390200 | 0.32165400  |
| H | 2.93515400  | -5.19967800 | -0.05771600 |
| C | -5.14478500 | 0.12369700  | -2.28333300 |
| H | -6.22015200 | 0.16445700  | -2.41953000 |
| O | 0.06215400  | 0.84915200  | 3.31583900  |
| H | -0.26114700 | 1.69590900  | 3.65447200  |
| H | -1.04774300 | -1.85697500 | 0.28237000  |

**IM-3'**

|   |             |             |             |
|---|-------------|-------------|-------------|
| F | 1.24940900  | -2.08248500 | -2.79856400 |
| F | 0.11246200  | -0.51538200 | -3.74928500 |
| F | -0.92683100 | -2.15630700 | -2.76990900 |
| N | -1.76014900 | 2.65925300  | -1.84951200 |
| H | -1.80961400 | 3.66613600  | -1.85982600 |
| N | 1.18486900  | -1.46085600 | 1.71651000  |
| H | 1.58923600  | -1.18477600 | 2.61091700  |
| C | 0.14257400  | -1.32827000 | -2.68339800 |
| C | -2.34485600 | 0.47585900  | -1.74499900 |
| C | -0.61652700 | 1.94293600  | -1.63051600 |
| H | 0.33715800  | 2.43364000  | -1.52901900 |
| C | 0.11074300  | -0.49147200 | -1.36405500 |
| C | 3.83685200  | 0.97086500  | -0.52378800 |
| C | -2.84244100 | 1.80336200  | -1.89984000 |
| C | -0.91574600 | 0.60229000  | -1.54210000 |
| C | -0.31937900 | 1.73729700  | 1.58605200  |
| C | 0.56977800  | -2.72759700 | -0.05329700 |
| C | 0.54206500  | -3.89175100 | -0.81010900 |
| H | -0.16075000 | -4.01989500 | -1.62146100 |
| C | -0.23457200 | -1.43215300 | -0.09876200 |
| C | 4.74094000  | 0.15552900  | 0.18193600  |
| H | 4.46967800  | -0.87141600 | 0.40253000  |
| C | 2.56267600  | 0.45838500  | -0.90319700 |
| C | 1.14800200  | 3.56183700  | 0.94849600  |
| H | 2.14818100  | 3.92599000  | 0.73911000  |
| C | -1.81834700 | -0.22726100 | 2.45025800  |

|   |             |             |             |
|---|-------------|-------------|-------------|
| C | -3.26707300 | -0.58872000 | -1.77781700 |
| H | -2.93869000 | -1.61632900 | -1.68917000 |
| C | 0.96572300  | 2.23368300  | 1.31848000  |
| H | 1.82602100  | 1.58320000  | 1.41312300  |
| C | 4.18225100  | 2.30380800  | -0.81476600 |
| H | 3.48222700  | 2.92758900  | -1.35959100 |
| C | -2.86278900 | -0.14622900 | 1.52270400  |
| H | -2.70818600 | 0.33301200  | 0.56770000  |
| C | 1.45513300  | 0.04978400  | -1.16751500 |
| C | 0.19896100  | -0.77150400 | 1.21640400  |
| C | -1.41220700 | 2.60344500  | 1.52514200  |
| H | -2.40643500 | 2.25323700  | 1.76694900  |
| C | -0.41073800 | 0.30658100  | 2.12285900  |
| C | -4.11540600 | -0.67811400 | 1.82050200  |
| H | -4.90900800 | -0.60267500 | 1.08499100  |
| C | 1.47444000  | -2.64696000 | 1.00836500  |
| C | 5.41246400  | 2.80815600  | -0.40297900 |
| H | 5.67490000  | 3.83634000  | -0.62937100 |
| C | 6.30638400  | 1.99461500  | 0.29784300  |
| H | 7.26448000  | 2.39184900  | 0.61677800  |
| C | -4.20209500 | 2.08744000  | -2.05104700 |
| H | -4.55095700 | 3.10926300  | -2.15772800 |
| C | -1.22718100 | 3.93708500  | 1.15431900  |
| H | -2.08551200 | 4.59909800  | 1.10632700  |
| C | 5.96888400  | 0.67022800  | 0.58762300  |
| H | 6.66394300  | 0.03814200  | 1.13050100  |
| C | -2.03815600 | -0.86777100 | 3.67470400  |
| H | -1.22802400 | -0.94662700 | 4.38788600  |
| C | 0.04676800  | 4.41772400  | 0.85627300  |
| H | 0.18526700  | 5.45487000  | 0.56873800  |
| C | -4.33624400 | -1.30302000 | 3.04898800  |
| H | -5.31113900 | -1.71853300 | 3.28259600  |
| C | -4.61944500 | -0.30846600 | -1.92553700 |
| H | -5.33193200 | -1.12674500 | -1.94553000 |
| C | 2.37716300  | -4.77784500 | 0.54014200  |
| H | 3.07295900  | -5.58257800 | 0.74878400  |
| C | 2.39575400  | -3.62878000 | 1.33500500  |
| H | 3.07414800  | -3.51865900 | 2.17282900  |
| C | -3.29482200 | -1.39512400 | 3.97294600  |
| H | -3.45567200 | -1.88313400 | 4.92876100  |
| C | 1.45327700  | -4.90990000 | -0.50140500 |
| H | 1.43619700  | -5.82429400 | -1.08411600 |
| C | -5.08523600 | 1.01512500  | -2.05668000 |
| H | -6.14853100 | 1.19914900  | -2.16935200 |

|   |             |             |             |
|---|-------------|-------------|-------------|
| O | 0.41486900  | 0.24429800  | 3.29479500  |
| H | 0.35906800  | 1.10035600  | 3.74138900  |
| H | -1.31179100 | -1.60241000 | -0.09568200 |

### Dehydration and protonation reaction

#### IM-3

|   |             |             |             |
|---|-------------|-------------|-------------|
| F | 5.43377100  | -2.19958600 | -2.10410100 |
| F | 6.97235000  | -0.66842900 | -2.02218200 |
| F | 5.42715700  | -0.56886900 | -3.54549500 |
| N | 5.99728600  | 3.44568600  | -1.32353700 |
| H | 6.72049800  | 4.14752600  | -1.30588700 |
| N | -0.47952600 | -1.94873500 | -0.21681400 |
| H | -1.48290900 | -1.76243000 | -0.15957000 |
| C | 5.64690500  | -0.87434500 | -2.24672100 |
| C | 3.98291400  | 2.43210700  | -1.39861000 |
| C | 6.22000000  | 2.08780600  | -1.31932700 |
| H | 7.22283800  | 1.69295400  | -1.28429400 |
| C | 4.80045900  | -0.03686500 | -1.32045500 |
| C | 3.68487500  | -1.73820600 | 1.59893900  |
| C | 4.63996300  | 3.69364000  | -1.37038000 |
| C | 5.01201700  | 1.42135900  | -1.35555200 |
| C | 1.24706600  | 0.44835900  | 2.15118200  |
| C | 1.48360600  | -2.70102100 | -1.02586800 |
| C | 2.30367900  | -3.53206700 | -1.80771300 |
| H | 3.38092100  | -3.41340100 | -1.78662600 |
| C | 1.74964100  | -1.63281300 | -0.09182500 |
| C | 4.84866000  | -1.17570200 | 2.14144800  |
| H | 5.32877500  | -0.35039800 | 1.62676400  |
| C | 3.13038600  | -1.25215200 | 0.30278100  |
| C | 2.52396500  | 0.25756600  | 4.20534600  |
| H | 2.71479700  | -0.25572100 | 5.14133500  |
| C | -0.52785500 | 1.10862500  | 0.44949100  |
| C | 2.58285300  | 2.39269200  | -1.49291700 |
| H | 2.06214900  | 1.44158600  | -1.53246600 |
| C | 1.50608300  | -0.19546800 | 3.36795000  |
| H | 0.93142500  | -1.06877300 | 3.65598500  |
| C | 3.05734400  | -2.78887600 | 2.28184000  |
| H | 2.15655800  | -3.22758200 | 1.86795600  |
| C | -0.73625400 | 1.03400500  | -0.93056200 |
| H | -0.39394600 | 0.17139200  | -1.48720100 |
| C | 3.92271300  | -0.63135300 | -0.54394500 |
| C | 0.51716600  | -1.19499800 | 0.37484200  |
| C | 2.05013200  | 1.52639000  | 1.76950900  |
| H | 1.86802800  | 2.03111000  | 0.83084700  |



|   |             |             |             |
|---|-------------|-------------|-------------|
| C | 0.10694100  | -0.03625800 | 1.25642100  |
| C | -1.39210300 | 2.06632300  | -1.60597000 |
| H | -1.55256300 | 1.98636900  | -2.67598500 |
| C | 0.07421800  | -2.86475400 | -1.07826700 |
| C | 3.57964100  | -3.26238200 | 3.48406400  |
| H | 3.08198000  | -4.07704600 | 4.00140500  |
| C | 4.73478000  | -2.69253700 | 4.02134300  |
| H | 5.13865400  | -3.05746300 | 4.96066700  |
| C | 3.93581200  | 4.90188200  | -1.39988500 |
| H | 4.45325100  | 5.85562700  | -1.37134400 |
| C | 3.08691000  | 1.96018600  | 2.59290900  |
| H | 3.70666200  | 2.79211300  | 2.27343300  |
| C | 5.36839800  | -1.64881800 | 3.34219200  |
| H | 6.26324500  | -1.19417900 | 3.75631600  |
| C | -0.97309600 | 2.24606500  | 1.13901500  |
| H | -0.80986200 | 2.32544400  | 2.20874600  |
| C | 3.31888200  | 1.33532400  | 3.81888000  |
| H | 4.12254100  | 1.67766300  | 4.46307700  |
| C | -1.82938300 | 3.19311800  | -0.91314600 |
| H | -2.33347200 | 3.99726900  | -1.43956800 |
| C | 1.87944900  | 3.59044900  | -1.52476800 |
| H | 0.79794700  | 3.57082400  | -1.58604200 |
| C | 0.29592100  | -4.62502400 | -2.66606000 |
| H | -0.14138900 | -5.37537900 | -3.31758300 |
| C | -0.53708400 | -3.82122800 | -1.89757200 |
| H | -1.61713500 | -3.92077800 | -1.92904300 |
| C | -1.61019100 | 3.28322800  | 0.46458600  |
| H | -1.93826400 | 4.16038300  | 1.01359000  |
| C | 1.70097900  | -4.48346100 | -2.62020900 |
| H | 2.31781900  | -5.12992500 | -3.23698700 |
| C | 2.54928400  | 4.83087100  | -1.47116500 |
| H | 1.97020800  | 5.74886800  | -1.49255700 |
| O | -0.96511600 | -0.56760900 | 2.12776900  |
| H | -0.85347300 | -0.16076200 | 3.00100300  |
| P | -4.08531100 | -0.58598600 | 0.32968800  |
| O | -3.47572000 | -0.04385900 | 1.67402200  |
| O | -3.21895200 | -1.46102300 | -0.50141000 |
| O | -5.46071800 | -1.24234300 | 0.87319700  |
| O | -4.60235900 | 0.67409900  | -0.53858000 |
| C | -6.51886900 | -1.46628000 | -0.01842300 |
| C | -7.28423500 | -0.38036600 | -0.46982500 |
| C | -6.81895200 | -2.78000400 | -0.35784200 |
| C | -8.38911800 | -0.66976100 | -1.28659700 |
| C | -7.92186600 | -3.03835000 | -1.17062100 |

|   |             |             |             |
|---|-------------|-------------|-------------|
| C | -8.70766900 | -1.98049900 | -1.63313700 |
| H | -8.98831300 | 0.15235500  | -1.66349900 |
| H | -8.16292900 | -4.06078700 | -1.44127800 |
| H | -9.56338400 | -2.17549200 | -2.27081100 |
| C | -5.64368400 | 1.49234000  | -0.08073500 |
| C | -6.96165300 | 1.01065100  | -0.08421200 |
| C | -5.32954000 | 2.79501500  | 0.28608700  |
| C | -7.97413300 | 1.91013200  | 0.28751100  |
| C | -6.35470500 | 3.66607300  | 0.65155400  |
| C | -7.67894700 | 3.22256100  | 0.64809800  |
| H | -9.00043100 | 1.55907200  | 0.30940400  |
| H | -6.11770800 | 4.68514100  | 0.93870400  |
| H | -8.48040900 | 3.89451100  | 0.93637500  |
| H | -6.19353700 | -3.57816100 | 0.02531800  |
| H | -4.29210300 | 3.10395800  | 0.26953200  |
| H | -2.49154500 | -0.23597900 | 1.78136300  |

**TS-3**

|   |             |             |             |
|---|-------------|-------------|-------------|
| F | 4.77292000  | -1.25041100 | -2.97822400 |
| F | 6.21888900  | 0.36275800  | -2.75728200 |
| F | 4.26787000  | 0.76910600  | -3.62288000 |
| N | 5.16959400  | 3.67318000  | 0.14283900  |
| H | 5.75366400  | 4.30159900  | 0.67159700  |
| N | -0.40194400 | -1.87739500 | -0.37636800 |
| H | -1.40205000 | -1.60828600 | -0.34900000 |
| C | 4.90355200  | 0.05307200  | -2.66246700 |
| C | 3.48472500  | 2.83627600  | -1.10513600 |
| C | 5.45465100  | 2.34843400  | -0.10341300 |
| H | 6.35149200  | 1.89129700  | 0.28674700  |
| C | 4.35607600  | 0.38413000  | -1.29795500 |
| C | 4.05418900  | -2.28876800 | 1.14429400  |
| C | 3.96394600  | 4.00304700  | -0.44684000 |
| C | 4.44940000  | 1.79540600  | -0.86184200 |
| C | 1.53872500  | 0.52062400  | 1.79489700  |
| C | 1.47922200  | -3.01567100 | -0.88648800 |
| C | 2.21677300  | -4.05433100 | -1.48741700 |
| H | 3.29866600  | -4.07649000 | -1.40609900 |
| C | 1.84692600  | -1.86696900 | -0.11225200 |
| C | 5.38610900  | -1.94755200 | 1.42852000  |
| H | 5.84803700  | -1.12107300 | 0.89818200  |
| C | 3.26509800  | -1.50938300 | 0.15467100  |
| C | 3.12269000  | 0.00955900  | 3.56026100  |
| H | 3.52430900  | -0.69367200 | 4.28178700  |
| C | -0.38744000 | 1.11430200  | 0.22376600  |

|   |             |             |             |
|---|-------------|-------------|-------------|
| C | 2.25119600  | 2.88002500  | -1.77306900 |
| H | 1.87016400  | 1.99738200  | -2.27508700 |
| C | 2.06084900  | -0.37035100 | 2.74906400  |
| H | 1.63103000  | -1.35973500 | 2.84364100  |
| C | 3.46501000  | -3.35104700 | 1.84334100  |
| H | 2.43723600  | -3.62392400 | 1.63380400  |
| C | -0.67911500 | 1.03132200  | -1.14567400 |
| H | -0.30927200 | 0.19805300  | -1.72814000 |
| C | 3.80815700  | -0.55944000 | -0.57360200 |
| C | 0.65975700  | -1.18777700 | 0.18271800  |
| C | 2.09327600  | 1.80303800  | 1.67820900  |
| H | 1.71883500  | 2.49071500  | 0.93312500  |
| C | 0.43318200  | 0.06908300  | 0.90135100  |
| C | -1.43419100 | 2.02312400  | -1.76780700 |
| H | -1.65560700 | 1.94101700  | -2.82630600 |
| C | 0.06255300  | -2.99250500 | -1.01635500 |
| C | 4.18829700  | -4.05103900 | 2.80908200  |
| H | 3.71522800  | -4.86935900 | 3.34288600  |
| C | 5.50885900  | -3.70136500 | 3.08961600  |
| H | 6.07023700  | -4.24350400 | 3.84390100  |
| C | 3.23909900  | 5.19892200  | -0.43468900 |
| H | 3.61381600  | 6.07975000  | 0.07708500  |
| C | 3.16264500  | 2.17632400  | 2.48944400  |
| H | 3.59821000  | 3.16155300  | 2.37068400  |
| C | 6.10540000  | -2.64630400 | 2.39142200  |
| H | 7.13259200  | -2.36579600 | 2.60312000  |
| C | -0.86182900 | 2.21914300  | 0.95239300  |
| H | -0.65577400 | 2.29160500  | 2.01397500  |
| C | 3.68025500  | 1.28380400  | 3.42766200  |
| H | 4.51668800  | 1.57781300  | 4.05382400  |
| C | -1.89595800 | 3.11496200  | -1.03609800 |
| H | -2.48413500 | 3.88670700  | -1.52187900 |
| C | 1.52767100  | 4.06510100  | -1.75984500 |
| H | 0.56521100  | 4.10897200  | -2.25630900 |
| C | 0.11466500  | -5.00370000 | -2.28674400 |
| H | -0.38971700 | -5.79121200 | -2.83794800 |
| C | -0.63638500 | -3.98925200 | -1.71333500 |
| H | -1.71700800 | -3.95325600 | -1.79864300 |
| C | -1.60036200 | 3.21434400  | 0.32645200  |
| H | -1.95361100 | 4.06344000  | 0.90225400  |
| C | 1.52731400  | -5.03716900 | -2.17744300 |
| H | 2.07319200  | -5.84930200 | -2.64679800 |
| C | 2.01611400  | 5.21095400  | -1.09689300 |
| H | 1.42413700  | 6.12077700  | -1.10238500 |

|   |             |             |             |
|---|-------------|-------------|-------------|
| O | -0.76857200 | -0.55967800 | 2.20145500  |
| H | -0.56505200 | -0.04937300 | 3.00114400  |
| P | -3.81104400 | -0.54042300 | 0.43899800  |
| O | -3.11732300 | -0.05956800 | 1.70140200  |
| O | -3.04963200 | -1.33923400 | -0.57697700 |
| O | -5.14586200 | -1.32969200 | 0.98364200  |
| O | -4.49527500 | 0.71846500  | -0.35874600 |
| C | -6.21129300 | -1.57351100 | 0.12554000  |
| C | -7.07789600 | -0.52355600 | -0.22413300 |
| C | -6.43814800 | -2.88058700 | -0.29575900 |
| C | -8.19720600 | -0.84020500 | -1.01020100 |
| C | -7.55635700 | -3.16830000 | -1.07700100 |
| C | -8.43870500 | -2.14552400 | -1.43229600 |
| H | -8.87091300 | -0.04174800 | -1.30398400 |
| H | -7.73538300 | -4.18642500 | -1.40701200 |
| H | -9.30779400 | -2.36230700 | -2.04470900 |
| C | -5.54894900 | 1.42918000  | 0.20214600  |
| C | -6.83404900 | 0.86067500  | 0.23700800  |
| C | -5.31276600 | 2.73017200  | 0.63647600  |
| C | -7.88481600 | 1.66060600  | 0.71378100  |
| C | -6.37335100 | 3.50292000  | 1.10676700  |
| C | -7.66285700 | 2.96749800  | 1.14181700  |
| H | -8.88221900 | 1.23582400  | 0.76304400  |
| H | -6.19159500 | 4.51781500  | 1.44553600  |
| H | -8.49182000 | 3.56206000  | 1.51156200  |
| H | -5.73948400 | -3.65373600 | 0.00374700  |
| H | -4.30183100 | 3.11535900  | 0.58911400  |
| H | -1.78940300 | -0.34255500 | 1.94686800  |

**IM-4**

|   |             |             |             |
|---|-------------|-------------|-------------|
| F | -4.60619600 | 1.21389700  | -3.18742300 |
| F | -6.02017200 | -0.43774500 | -3.06936600 |
| F | -3.98219900 | -0.80222800 | -3.72925900 |
| N | -5.13574000 | -3.60634700 | 0.10973900  |
| H | -5.70507200 | -4.20777800 | 0.68399800  |
| N | 0.32625100  | 1.60103300  | -0.37638100 |
| H | 1.31750800  | 1.26452200  | -0.30848900 |
| C | -4.73161600 | -0.08537900 | -2.85526600 |
| C | -3.46486200 | -2.82136500 | -1.18956700 |
| C | -5.41205900 | -2.28645400 | -0.16498200 |
| H | -6.29519000 | -1.80815200 | 0.23089000  |
| C | -4.31321100 | -0.36857400 | -1.43424400 |
| C | -4.22569300 | 2.37611000  | 0.96428600  |
| C | -3.94160700 | -3.96276800 | -0.48648300 |

|   |             |             |             |
|---|-------------|-------------|-------------|
| C | -4.41902000 | -1.76619200 | -0.96202700 |
| C | -1.74984000 | -0.77559700 | 1.60019000  |
| C | -1.39417900 | 3.06375400  | -0.58170800 |
| C | -1.97374200 | 4.30074700  | -0.96090800 |
| H | -3.04140700 | 4.45946000  | -0.86035600 |
| C | -1.91743600 | 1.86130300  | -0.05490800 |
| C | -5.62305700 | 2.24281100  | 0.92427500  |
| H | -6.07253600 | 1.56352000  | 0.20696800  |
| C | -3.36348200 | 1.56150900  | 0.07050000  |
| C | -3.23978500 | -0.25599900 | 3.44638500  |
| H | -3.63532400 | 0.46004000  | 4.15863500  |
| C | 0.27097200  | -1.26703900 | 0.18435400  |
| C | -2.22980600 | -2.88664200 | -1.85239100 |
| H | -1.85463200 | -2.02432000 | -2.39221400 |
| C | -2.27350100 | 0.14292000  | 2.53544600  |
| H | -1.86820600 | 1.14444600  | 2.56494900  |
| C | -3.65659900 | 3.26349000  | 1.88909400  |
| H | -2.57999600 | 3.38254800  | 1.92942200  |
| C | 0.74252100  | -1.24203600 | -1.14635300 |
| H | 0.33969900  | -0.51641000 | -1.84169300 |
| C | -3.84637700 | 0.59926100  | -0.68694100 |
| C | -0.81574900 | 0.96243400  | 0.08977800  |
| C | -2.18373600 | -2.11767400 | 1.64309400  |
| H | -1.79398000 | -2.82887500 | 0.92815900  |
| C | -0.76565400 | -0.34386900 | 0.62073800  |
| C | 1.67831800  | -2.17014900 | -1.57823700 |
| H | 2.02370400  | -2.14886700 | -2.60575900 |
| C | 0.01736200  | 2.86730400  | -0.74308900 |
| C | -4.46585100 | 3.99483600  | 2.75804600  |
| H | -4.00829100 | 4.67554800  | 3.46881000  |
| C | -5.85238000 | 3.85122400  | 2.71592100  |
| H | -6.48165500 | 4.42013200  | 3.39278600  |
| C | -3.20994500 | -5.15253000 | -0.42212400 |
| H | -3.58005500 | -6.01280800 | 0.12643900  |
| C | -3.14969600 | -2.51085600 | 2.56099700  |
| H | -3.49377200 | -3.53859500 | 2.56663700  |
| C | -6.42745100 | 2.97187700  | 1.79313300  |
| H | -7.50596900 | 2.85724900  | 1.74952600  |
| C | 0.79068100  | -2.23340100 | 1.07143400  |
| H | 0.47373400  | -2.22626600 | 2.10644500  |
| C | -3.68770900 | -1.58157700 | 3.45451500  |
| H | -4.44441400 | -1.89199800 | 4.16809600  |
| C | 2.17162300  | -3.12980800 | -0.69120600 |
| H | 2.90895700  | -3.84994700 | -1.03023300 |

|   |             |             |             |
|---|-------------|-------------|-------------|
| C | -1.49504200 | -4.06284500 | -1.78044700 |
| H | -0.52551200 | -4.11840400 | -2.26341100 |
| C | 0.26288400  | 5.08306800  | -1.56238000 |
| H | 0.87617700  | 5.89422500  | -1.94160000 |
| C | 0.86105800  | 3.88690600  | -1.22162900 |
| H | 1.92720900  | 3.71750200  | -1.31752800 |
| C | 1.72982100  | -3.15609400 | 0.63433000  |
| H | 2.12862400  | -3.88832600 | 1.32818300  |
| C | -1.14352600 | 5.28947400  | -1.43856700 |
| H | -1.55771800 | 6.24950900  | -1.72749800 |
| C | -1.98022200 | -5.18276900 | -1.07236900 |
| H | -1.38072800 | -6.08664600 | -1.03224800 |
| O | 0.77270100  | 0.77898100  | 2.81003800  |
| H | 0.58523300  | 0.10601400  | 3.47526600  |
| P | 3.77505900  | 0.45110700  | 0.57186200  |
| O | 3.22142700  | 0.03561900  | 1.90277100  |
| O | 2.91334500  | 1.10717500  | -0.47709000 |
| O | 5.09210900  | 1.39799000  | 0.90665000  |
| O | 4.51668700  | -0.80725200 | -0.20145500 |
| C | 6.03522400  | 1.65418300  | -0.07325800 |
| C | 6.96305400  | 0.65786300  | -0.42806100 |
| C | 6.09488800  | 2.93179000  | -0.62510400 |
| C | 7.96483800  | 0.99817300  | -1.35066500 |
| C | 7.09832100  | 3.24443100  | -1.54092000 |
| C | 8.03723000  | 2.27539100  | -1.90230500 |
| H | 8.68120700  | 0.23831100  | -1.64653200 |
| H | 7.14507700  | 4.24007800  | -1.97039900 |
| H | 8.81780700  | 2.51082800  | -2.61844500 |
| C | 5.67239500  | -1.37002800 | 0.30946600  |
| C | 6.89844800  | -0.69479600 | 0.16751900  |
| C | 5.60481800  | -2.64184600 | 0.87381600  |
| C | 8.06040400  | -1.35510000 | 0.59686400  |
| C | 6.77306000  | -3.27550800 | 1.29452900  |
| C | 8.00444800  | -2.63195800 | 1.15144400  |
| H | 9.01376100  | -0.84401200 | 0.50764900  |
| H | 6.72043600  | -4.26662400 | 1.73381600  |
| H | 8.91694000  | -3.11781800 | 1.48140400  |
| H | 5.35773400  | 3.66509300  | -0.31733600 |
| H | 4.63526200  | -3.11604000 | 0.96647700  |
| H | 1.66568200  | 0.53599600  | 2.47078800  |

**IM-3'**

|   |            |             |             |
|---|------------|-------------|-------------|
| F | 1.49212000 | -3.15530400 | 0.95052700  |
| F | 1.42279100 | -4.29496900 | -0.90714100 |

|   |             |             |             |
|---|-------------|-------------|-------------|
| F | 0.08354700  | -4.79651600 | 0.72469700  |
| N | -2.41800500 | -4.43978200 | -3.08953500 |
| H | -2.54796900 | -5.01596500 | -3.90650000 |
| N | -3.26465800 | 0.92025800  | 2.38229400  |
| H | -4.15560200 | 1.35456200  | 2.57346700  |
| C | 0.65574200  | -3.76077400 | 0.07076400  |
| C | -2.80550200 | -3.08424500 | -1.32911400 |
| C | -1.20877800 | -4.21146200 | -2.47364600 |
| H | -0.29973100 | -4.64946200 | -2.85545600 |
| C | -0.37923100 | -2.82025800 | -0.48332600 |
| C | 0.00822400  | 0.76904100  | -0.76960800 |
| C | -3.41747700 | -3.76283600 | -2.41836700 |
| C | -1.39533800 | -3.37793700 | -1.39058300 |
| C | -4.79712500 | 1.85444000  | 0.14235700  |
| C | -1.45414200 | -0.41219600 | 2.54219400  |
| C | -0.56291500 | -1.27331600 | 3.20549400  |
| H | 0.27175500  | -1.72444600 | 2.68060800  |
| C | -1.53852800 | 0.10267200  | 1.19533900  |
| C | 0.22317900  | 0.53853600  | -2.13407400 |
| H | -0.10188100 | -0.39944600 | -2.57090700 |
| C | -0.64132100 | -0.26907600 | 0.07810500  |
| C | -7.09528600 | 1.27966900  | -0.38629600 |
| H | -7.79844800 | 0.68847100  | -0.96496800 |
| C | -2.60859200 | 2.98551800  | -0.29411500 |
| C | -3.60789800 | -2.35322900 | -0.43566100 |
| H | -3.16818300 | -1.87807600 | 0.43534500  |
| C | -5.72468600 | 1.10650600  | -0.58753000 |
| H | -5.37956800 | 0.39679700  | -1.32747300 |
| C | 0.43020600  | 1.97540600  | -0.20035500 |
| H | 0.27096000  | 2.14776200  | 0.85724600  |
| C | -2.10218200 | 3.73784400  | 0.76934600  |
| H | -2.12395700 | 3.33495400  | 1.77663900  |
| C | -0.40793200 | -1.55290600 | -0.13721100 |
| C | -2.67476100 | 0.90027000  | 1.13462500  |
| C | -5.27228800 | 2.80747200  | 1.05529000  |
| H | -4.57355100 | 3.44323000  | 1.58886900  |
| C | -3.28089700 | 1.62785000  | -0.05938000 |
| C | -1.53894800 | 4.99360800  | 0.54195200  |
| H | -1.14380800 | 5.56395200  | 1.37693300  |
| C | -2.55207000 | 0.13158600  | 3.26198500  |
| C | 1.04485700  | 2.94607200  | -0.98643800 |
| H | 1.35730200  | 3.88199300  | -0.53669900 |
| C | 1.23744300  | 2.72188600  | -2.34937500 |
| H | 1.70139400  | 3.48577900  | -2.96587500 |

|   |             |             |             |
|---|-------------|-------------|-------------|
| C | -4.79418800 | -3.69596600 | -2.65522100 |
| H | -5.24585500 | -4.21413800 | -3.49498100 |
| C | -6.64154300 | 2.97485900  | 1.26332100  |
| H | -6.98801500 | 3.71586600  | 1.97692200  |
| C | 0.82955300  | 1.51340100  | -2.92098600 |
| H | 0.97763200  | 1.33448300  | -3.98147200 |
| C | -2.54862100 | 3.50616400  | -1.58923000 |
| H | -2.93513700 | 2.91997500  | -2.41397000 |
| C | -7.55998100 | 2.20656800  | 0.54614700  |
| H | -8.62560000 | 2.33930200  | 0.70348600  |
| C | -1.46861000 | 5.50454000  | -0.75385900 |
| H | -1.02109000 | 6.47699700  | -0.93430200 |
| C | -4.97919100 | -2.29405600 | -0.66439200 |
| H | -5.61221900 | -1.74139300 | 0.02140400  |
| C | -1.87939900 | -1.00439900 | 5.24285700  |
| H | -2.02429300 | -1.25040900 | 6.28996500  |
| C | -2.77865700 | -0.15291300 | 4.61187100  |
| H | -3.62431800 | 0.27249700  | 5.14229500  |
| C | -1.97314600 | 4.75461000  | -1.81799300 |
| H | -1.91723200 | 5.14186000  | -2.83081400 |
| C | -0.78402200 | -1.55788600 | 4.54661200  |
| H | -0.10487300 | -2.22307400 | 5.07039400  |
| C | -5.56285000 | -2.94725200 | -1.77033400 |
| H | -6.63453700 | -2.87574900 | -1.92557300 |
| O | -3.04253900 | 0.84632300  | -1.22756600 |
| H | -3.29296200 | -0.07272300 | -1.03844000 |
| P | 3.32478100  | -0.65060200 | -0.25094800 |
| O | 2.39039500  | -0.46011300 | 1.02616900  |
| O | 2.78696900  | -1.42775000 | -1.38409200 |
| O | 3.74979200  | 0.88826300  | -0.51664100 |
| O | 4.69426700  | -1.30261500 | 0.31666100  |
| C | 4.91602600  | 1.16400000  | -1.23759400 |
| C | 6.16237500  | 1.00559100  | -0.61257100 |
| C | 4.78732000  | 1.66544800  | -2.52729000 |
| C | 7.29953600  | 1.38677700  | -1.34276500 |
| C | 5.93363900  | 2.03537700  | -3.22935100 |
| C | 7.18983800  | 1.89726400  | -2.63415600 |
| H | 8.27741800  | 1.26003800  | -0.89021800 |
| H | 5.84446600  | 2.42775000  | -4.23692800 |
| H | 8.08494300  | 2.17838400  | -3.17899600 |
| C | 5.51867400  | -0.61215300 | 1.21153800  |
| C | 6.27542300  | 0.48390200  | 0.76731400  |
| C | 5.61926400  | -1.10587000 | 2.50716900  |
| C | 7.16000300  | 1.06805800  | 1.68855100  |



|   |            |             |             |
|---|------------|-------------|-------------|
| C | 6.50494500 | -0.50590900 | 3.40083900  |
| C | 7.27830800 | 0.58119100  | 2.98791200  |
| H | 7.74403600 | 1.92733200  | 1.37608100  |
| H | 6.58805200 | -0.88629100 | 4.41341700  |
| H | 7.96562500 | 1.05594900  | 3.68014400  |
| H | 3.79456400 | 1.76758000  | -2.94881600 |
| H | 5.01111800 | -1.95696100 | 2.79160400  |
| H | 1.48859200 | -0.79236000 | 0.84890700  |

**TS-4**

|   |             |             |             |
|---|-------------|-------------|-------------|
| F | 1.67369600  | -3.76568400 | -0.42335000 |
| F | 1.04294400  | -3.90242000 | -2.50353500 |
| F | -0.10159200 | -4.90237400 | -0.95121200 |
| N | -2.95740700 | -2.55913700 | -3.60371400 |
| H | -3.29389700 | -2.58229400 | -4.55362000 |
| N | -3.08711600 | 0.32297500  | 2.43106800  |
| H | -4.00852100 | 0.66138800  | 2.67695100  |
| C | 0.59378900  | -3.77009000 | -1.22774100 |
| C | -2.87418900 | -2.45216500 | -1.35071200 |
| C | -1.63299300 | -2.63283100 | -3.23456400 |
| H | -0.85461600 | -2.72509700 | -3.97623900 |
| C | -0.27707000 | -2.55324300 | -1.07345300 |
| C | 0.02596900  | 0.85968700  | -0.74804300 |
| C | -3.74618400 | -2.45104300 | -2.47822400 |
| C | -1.52683400 | -2.55922600 | -1.86195900 |
| C | -4.68306400 | 1.62110700  | 0.50451300  |
| C | -1.26337000 | -0.99903500 | 2.33819600  |
| C | -0.36645700 | -1.96562100 | 2.81735400  |
| H | 0.50364200  | -2.25258800 | 2.23869700  |
| C | -1.30946300 | -0.16007000 | 1.14934300  |
| C | 0.23241900  | 0.76372500  | -2.13577700 |
| H | -0.01291800 | -0.15967900 | -2.64619700 |
| C | -0.45987500 | -0.29453000 | 0.00631800  |
| C | -6.98450800 | 1.07335300  | -0.02617900 |
| H | -7.69638200 | 0.56573700  | -0.66959000 |
| C | -2.58170500 | 2.89704100  | 0.09819000  |
| C | -3.43129300 | -2.40382700 | -0.05858200 |
| H | -2.78939900 | -2.43610000 | 0.81349800  |
| C | -5.62064800 | 0.98098300  | -0.30809200 |
| H | -5.29172800 | 0.41509700  | -1.16843200 |
| C | 0.36803100  | 2.04256600  | -0.07248600 |
| H | 0.25296400  | 2.09058800  | 1.00245200  |
| C | -2.08583800 | 3.55703300  | 1.22602300  |
| H | -2.04210600 | 3.04405000  | 2.18173300  |

|   |             |             |             |
|---|-------------|-------------|-------------|
| C | 0.10621100  | -1.54275700 | -0.29002600 |
| C | -2.47331400 | 0.63332900  | 1.25841700  |
| C | -5.13924100 | 2.38442000  | 1.59014100  |
| H | -4.43521500 | 2.93801300  | 2.20247400  |
| C | -3.17281100 | 1.48921400  | 0.19666100  |
| C | -1.61069400 | 4.86438500  | 1.12620700  |
| H | -1.22056800 | 5.36280600  | 2.00794100  |
| C | -2.38042900 | -0.64545700 | 3.13071600  |
| C | 0.88437600  | 3.12378000  | -0.77714400 |
| H | 1.15084300  | 4.03255300  | -0.25072400 |
| C | 1.03250200  | 3.04169600  | -2.16183400 |
| H | 1.41273800  | 3.89453000  | -2.71562400 |
| C | -5.13779500 | -2.37987000 | -2.34372800 |
| H | -5.78589200 | -2.37942200 | -3.21415200 |
| C | -6.50160200 | 2.46819600  | 1.87750300  |
| H | -6.83455000 | 3.06025000  | 2.72401300  |
| C | 0.70706700  | 1.86128200  | -2.84071300 |
| H | 0.83582800  | 1.79933000  | -3.91604700 |
| C | -2.60359500 | 3.55936700  | -1.13119100 |
| H | -2.98269100 | 3.04406100  | -2.00477900 |
| C | -7.43066600 | 1.80822400  | 1.07124100  |
| H | -8.49122800 | 1.87669600  | 1.29103200  |
| C | -1.62287600 | 5.52009400  | -0.10510500 |
| H | -1.24534900 | 6.53444000  | -0.18684600 |
| C | -4.81196600 | -2.33316800 | 0.07564600  |
| H | -5.25029800 | -2.28591000 | 1.06697400  |
| C | -1.74909300 | -2.19074600 | 4.81843200  |
| H | -1.91866800 | -2.67184900 | 5.77595300  |
| C | -2.64418000 | -1.22405700 | 4.37241800  |
| H | -3.50726900 | -0.93064200 | 4.96014200  |
| C | -2.11851700 | 4.86188800  | -1.23225000 |
| H | -2.12583000 | 5.36328000  | -2.19505900 |
| C | -0.62388000 | -2.55223500 | 4.05161700  |
| H | 0.05573700  | -3.30730000 | 4.43266300  |
| C | -5.65579900 | -2.32029300 | -1.05523000 |
| H | -6.72990600 | -2.25660500 | -0.91595100 |
| O | -2.97238800 | 0.86102700  | -1.06470800 |
| H | -3.19008000 | -0.08155800 | -0.97567500 |
| P | 3.46767300  | -0.79389000 | -0.52372700 |
| O | 2.50326100  | -1.21348500 | 0.60877400  |
| O | 3.15312400  | -1.12492200 | -1.93525700 |
| O | 3.68465200  | 0.80962200  | -0.23372600 |
| O | 4.95251100  | -1.38399500 | -0.14830900 |
| C | 4.80551800  | 1.46025100  | -0.73202900 |

|   |            |             |             |
|---|------------|-------------|-------------|
| C | 6.05098200 | 1.27116700  | -0.10857300 |
| C | 4.64267100 | 2.35169500  | -1.78832600 |
| C | 7.13439000 | 2.02978800  | -0.57947800 |
| C | 5.73515700 | 3.09158300  | -2.23815400 |
| C | 6.98247300 | 2.93235100  | -1.62976400 |
| H | 8.10828700 | 1.88874200  | -0.12185300 |
| H | 5.61184100 | 3.78783700  | -3.06149100 |
| H | 7.83751200 | 3.50177300  | -1.97925500 |
| C | 5.62417200 | -0.95343400 | 0.98948000  |
| C | 6.21032500 | 0.32403300  | 1.01666100  |
| C | 5.77016500 | -1.84782000 | 2.04587900  |
| C | 6.96720500 | 0.66602900  | 2.14872200  |
| C | 6.52524600 | -1.48276800 | 3.15930600  |
| C | 7.12777800 | -0.22364600 | 3.20838800  |
| H | 7.41617300 | 1.65289600  | 2.19631300  |
| H | 6.64076600 | -2.17892500 | 3.98367500  |
| H | 7.71300100 | 0.06855700  | 4.07415300  |
| H | 3.65899600 | 2.45606800  | -2.22928200 |
| H | 5.29730400 | -2.82065900 | 1.97291000  |
| H | 1.36435800 | -1.46226500 | 0.20425000  |

#### IM-4'

|   |             |             |             |
|---|-------------|-------------|-------------|
| F | 0.25337800  | -4.32736200 | -1.84337700 |
| F | -1.52565000 | -4.18838400 | -3.08779800 |
| F | -1.70866500 | -4.71990500 | -0.98642600 |
| N | -4.39847500 | -0.86605300 | -2.30104900 |
| H | -5.00363700 | -0.38460600 | -2.94886400 |
| N | -2.57941700 | 0.59925100  | 1.91794400  |
| H | -3.36350800 | 1.13952400  | 2.26433200  |
| C | -1.03134300 | -3.92812100 | -1.85676600 |
| C | -3.69307500 | -2.21829300 | -0.63003900 |
| C | -3.07037100 | -1.15757600 | -2.53688200 |
| H | -2.56945400 | -0.79412700 | -3.42210600 |
| C | -1.20856500 | -2.47950300 | -1.47828400 |
| C | 0.47964400  | 0.68387200  | -1.34697000 |
| C | -4.80831100 | -1.49842800 | -1.14052600 |
| C | -2.59117400 | -1.97141700 | -1.53073700 |
| C | -3.83850000 | 2.48590900  | 0.33634700  |
| C | -1.20208400 | -1.14356000 | 1.55517900  |
| C | -0.57016200 | -2.35026400 | 1.87862200  |
| H | 0.22533500  | -2.73642500 | 1.25699200  |
| C | -1.03085400 | -0.16365400 | 0.48106900  |
| C | 0.72673300  | 0.60673200  | -2.73433500 |
| H | 0.35112200  | -0.23981900 | -3.29800400 |

|   |             |             |             |
|---|-------------|-------------|-------------|
| C | -0.23517600 | -0.36817100 | -0.66883400 |
| C | -6.22212700 | 2.31648600  | -0.07692500 |
| H | -7.03787500 | 1.96502300  | -0.70071100 |
| C | -1.49360300 | 3.34547000  | 0.15741400  |
| C | -3.82974600 | -2.93001400 | 0.57387400  |
| H | -2.99156900 | -3.47953400 | 0.98319700  |
| C | -4.90581700 | 2.04260000  | -0.44789600 |
| H | -4.71098800 | 1.49197900  | -1.35743000 |
| C | 1.00430400  | 1.76391000  | -0.61124900 |
| H | 0.91340600  | 1.75360800  | 0.46453200  |
| C | -0.79837300 | 3.56110100  | 1.34966000  |
| H | -0.83920800 | 2.82632400  | 2.14745400  |
| C | -0.12562600 | -1.73707900 | -1.19006100 |
| C | -1.92456800 | 0.91256600  | 0.78109800  |
| C | -4.11329400 | 3.22990900  | 1.49317600  |
| H | -3.29944800 | 3.62064000  | 2.09439500  |
| C | -2.38460800 | 2.11875600  | -0.04913600 |
| C | -0.01788400 | 4.70660100  | 1.51240100  |
| H | 0.52811100  | 4.85629700  | 2.43817600  |
| C | -2.16637900 | -0.62271900 | 2.43926600  |
| C | 1.70231400  | 2.77604100  | -1.25383500 |
| H | 2.10332100  | 3.60158600  | -0.67792000 |
| C | 1.88869000  | 2.72041900  | -2.63531800 |
| H | 2.43069300  | 3.51400400  | -3.13987000 |
| C | -6.04011900 | -1.46235500 | -0.47997400 |
| H | -6.87524200 | -0.89582200 | -0.87764700 |
| C | -5.43077400 | 3.49580900  | 1.86930500  |
| H | -5.62415100 | 4.07206000  | 2.76836800  |
| C | 1.40803200  | 1.63028900  | -3.37474700 |
| H | 1.57294200  | 1.58503200  | -4.44587700 |
| C | -1.42090900 | 4.29684400  | -0.86350100 |
| H | -1.96052100 | 4.12715500  | -1.78715200 |
| C | -6.49074500 | 3.03683500  | 1.08674200  |
| H | -7.51520200 | 3.24688500  | 1.37636600  |
| C | 0.06821700  | 5.64592400  | 0.48478900  |
| H | 0.68069900  | 6.53348200  | 0.60724500  |
| C | -5.05213700 | -2.89963900 | 1.22900300  |
| H | -5.16872300 | -3.43765300 | 2.16409000  |
| C | -1.97588100 | -2.49923600 | 3.87246200  |
| H | -2.26794800 | -3.05054500 | 4.75995200  |
| C | -2.57981000 | -1.27587500 | 3.59754900  |
| H | -3.33023800 | -0.84793200 | 4.25253300  |
| C | -0.63811500 | 5.43777900  | -0.70214300 |
| H | -0.57637200 | 6.16429900  | -1.50627700 |

|   |             |             |             |
|---|-------------|-------------|-------------|
| C | -0.97567100 | -3.01971600 | 3.02984200  |
| H | -0.50542800 | -3.96297800 | 3.28743200  |
| C | -6.14462100 | -2.17301600 | 0.70939900  |
| H | -7.08521000 | -2.16597800 | 1.25086800  |
| O | -2.30069900 | 1.77716400  | -1.42648200 |
| H | -2.66778200 | 0.88855900  | -1.55384600 |
| P | 3.12784700  | -1.18336600 | -0.09089300 |
| O | 1.99024800  | -0.98263700 | 0.86771400  |
| O | 2.95850600  | -1.93771700 | -1.37636300 |
| O | 3.75383400  | 0.33579700  | -0.35740700 |
| O | 4.43967300  | -1.87747600 | 0.67146900  |
| C | 5.00632500  | 0.48826700  | -0.91139200 |
| C | 6.14708300  | 0.29481800  | -0.11027600 |
| C | 5.11248500  | 0.91775700  | -2.23302800 |
| C | 7.40071500  | 0.56758600  | -0.67958500 |
| C | 6.36932900  | 1.18001400  | -2.77625600 |
| C | 7.51593800  | 1.00818100  | -1.99659400 |
| H | 8.29206700  | 0.41097200  | -0.08009400 |
| H | 6.45263900  | 1.51519200  | -3.80544400 |
| H | 8.49718600  | 1.20562000  | -2.41616800 |
| C | 5.13680500  | -1.19591100 | 1.64784400  |
| C | 6.02030600  | -0.15796900 | 1.29232500  |
| C | 5.01726100  | -1.61883800 | 2.97098700  |
| C | 6.78851900  | 0.42537800  | 2.31228900  |
| C | 5.78937700  | -1.02174300 | 3.96604500  |
| C | 6.68091200  | 0.00135100  | 3.63496900  |
| H | 7.46431200  | 1.23548700  | 2.05635500  |
| H | 5.69388800  | -1.35426700 | 4.99492500  |
| H | 7.28219000  | 0.47396600  | 4.40498600  |
| H | 4.20293800  | 1.04937500  | -2.80725300 |
| H | 4.32355400  | -2.42143500 | 3.19610800  |
| H | 0.88615600  | -2.11266700 | -1.34975800 |

### IM-3 conformation 1

|   |             |             |             |
|---|-------------|-------------|-------------|
| F | 0.11238800  | 0.19465700  | -3.31429200 |
| F | -0.84422500 | 2.14748500  | -3.38983000 |
| F | -2.05432600 | 0.35075600  | -3.22009200 |
| N | -3.32834400 | 2.74822500  | 0.76323900  |
| H | -3.61099300 | 3.49604100  | 1.37659800  |
| N | 2.53298600  | -2.62128600 | 0.84001500  |
| H | 2.34295900  | -3.48108800 | 1.33278900  |
| C | -0.90307400 | 0.92396400  | -2.80051900 |
| C | -3.32620400 | 0.83875100  | -0.44724900 |
| C | -2.08475600 | 2.62260600  | 0.19420700  |

|   |             |             |             |
|---|-------------|-------------|-------------|
| H | -1.31347000 | 3.35923400  | 0.36192000  |
| C | -0.83258000 | 1.03517300  | -1.29607700 |
| C | 2.34359900  | 2.03227700  | -0.07036200 |
| C | -4.11083300 | 1.66818600  | 0.40280200  |
| C | -2.03459500 | 1.47541400  | -0.56714600 |
| C | -0.38327600 | -0.69983500 | 2.06131700  |
| C | 3.52661700  | -0.89822700 | -0.21258600 |
| C | 4.58281800  | -0.26334500 | -0.88961700 |
| H | 4.46456400  | 0.74364100  | -1.27269500 |
| C | 2.17104600  | -0.51501300 | 0.13520500  |
| C | 2.15003800  | 3.12209000  | -0.93303600 |
| H | 1.44669800  | 3.02954300  | -1.75483700 |
| C | 1.55683100  | 0.77348700  | -0.23851900 |
| C | -0.07033800 | 1.15259400  | 3.60578300  |
| H | 0.59865900  | 1.79242700  | 4.17297600  |
| C | -0.67459100 | -2.51142000 | 0.24624500  |
| C | -3.87103800 | -0.37170900 | -0.90566500 |
| H | -3.28603300 | -1.03287100 | -1.53161900 |
| C | 0.45628800  | 0.12869400  | 2.82155100  |
| H | 1.52981000  | -0.01962600 | 2.78714900  |
| C | 3.25972800  | 2.15439400  | 0.98358700  |
| H | 3.41975300  | 1.31321400  | 1.64859000  |
| C | -0.44669100 | -2.28178900 | -1.11354200 |
| H | 0.39479500  | -1.68011700 | -1.42812300 |
| C | 0.34060300  | 0.86862500  | -0.73281400 |
| C | 1.60558800  | -1.60633300 | 0.77886000  |
| C | -1.76337400 | -0.48650100 | 2.11709000  |
| H | -2.43241300 | -1.09542000 | 1.52468800  |
| C | 0.22483100  | -1.90854800 | 1.33459900  |
| C | -1.29192000 | -2.82794900 | -2.08025600 |
| H | -1.10154700 | -2.62306100 | -3.12882200 |
| C | 3.71588500  | -2.22724000 | 0.25708300  |
| C | 3.96355700  | 3.34270700  | 1.17384500  |
| H | 4.66843100  | 3.42337900  | 1.99565900  |
| C | 3.76452600  | 4.42331400  | 0.31309100  |
| H | 4.31662000  | 5.34648000  | 0.45880000  |
| C | -5.41387600 | 1.33120700  | 0.78214700  |
| H | -5.99515400 | 1.97918600  | 1.43067800  |
| C | -2.29285900 | 0.52397800  | 2.91985700  |
| H | -3.36655900 | 0.67248600  | 2.94287800  |
| C | 2.85470200  | 4.30798100  | -0.74130400 |
| H | 2.69957100  | 5.14088500  | -1.42018500 |
| C | -1.75352500 | -3.32419300 | 0.61964800  |
| H | -1.91841700 | -3.53216300 | 1.66985100  |

|   |             |             |             |
|---|-------------|-------------|-------------|
| C | -1.45104500 | 1.35086800  | 3.66112600  |
| H | -1.86513300 | 2.14566300  | 4.27404000  |
| C | -2.37359300 | -3.62206300 | -1.69996400 |
| H | -3.03217100 | -4.04710500 | -2.45107600 |
| C | -5.16123000 | -0.71487900 | -0.52210900 |
| H | -5.58614700 | -1.65400300 | -0.86313200 |
| C | 5.95075400  | -2.25874600 | -0.56635000 |
| H | 6.89999000  | -2.76455100 | -0.71279600 |
| C | 4.92115800  | -2.91758100 | 0.09548400  |
| H | 5.04178700  | -3.93020100 | 0.46696900  |
| C | -2.59927500 | -3.87054800 | -0.34453700 |
| H | -3.43258500 | -4.49424800 | -0.03593200 |
| C | 5.78043200  | -0.94750500 | -1.05737400 |
| H | 6.60233400  | -0.46564900 | -1.57784600 |
| C | -5.92780500 | 0.12894500  | 0.30846100  |
| H | -6.93404000 | -0.16702400 | 0.58837200  |
| O | 0.37770100  | -2.96836100 | 2.31748000  |
| H | 0.65491100  | -2.54379600 | 3.14263300  |

### IM-3 conformation 2

|   |             |             |             |
|---|-------------|-------------|-------------|
| F | 3.10557000  | -3.52143200 | -0.53976500 |
| F | 4.21606100  | -3.04540000 | 1.27439600  |
| F | 4.37242200  | -1.74942700 | -0.45973100 |
| N | 2.64618100  | 1.01394600  | 3.25787300  |
| H | 2.56730000  | 1.39895600  | 4.18620700  |
| N | -0.90597900 | 0.96997600  | -2.31320400 |
| H | -1.14414600 | 1.93389000  | -2.49083000 |
| C | 3.50185100  | -2.50719500 | 0.25695600  |
| C | 2.95782500  | 0.81120200  | 1.03270200  |
| C | 2.43129600  | -0.30721900 | 2.93009300  |
| H | 2.14506500  | -1.02605200 | 3.68304100  |
| C | 2.34908900  | -1.68847900 | 0.75717200  |
| C | -1.26141800 | -2.50494800 | 0.64552300  |
| C | 2.96572900  | 1.72883200  | 2.12058400  |
| C | 2.61800700  | -0.48333300 | 1.57832500  |
| C | -1.24382100 | 2.67453300  | -0.02045200 |
| C | -0.04682900 | -1.10331700 | -2.53609800 |
| C | 0.52276100  | -2.17895500 | -3.23623600 |
| H | 0.82451700  | -3.07573900 | -2.70383800 |
| C | -0.36585200 | -0.87812000 | -1.15128300 |
| C | -1.10855800 | -3.06760900 | 1.92225100  |
| H | -0.14581600 | -3.00136000 | 2.42027300  |
| C | -0.13535700 | -1.81418400 | -0.01866300 |
| C | 0.19419200  | 4.58647600  | -0.44791100 |

|   |             |             |             |
|---|-------------|-------------|-------------|
| H | 1.18162100  | 4.97851600  | -0.66915200 |
| C | -2.77840900 | 0.70396800  | 0.51170900  |
| C | 3.24626500  | 1.27288400  | -0.26337500 |
| H | 3.24390800  | 0.58233700  | -1.09980200 |
| C | 0.01815200  | 3.21202700  | -0.31623400 |
| H | 0.87364300  | 2.55698600  | -0.44643200 |
| C | -2.50895300 | -2.58138200 | 0.01305500  |
| H | -2.63497300 | -2.13432200 | -0.96585400 |
| C | -3.73971700 | 0.61822900  | -0.50179800 |
| H | -3.46811600 | 0.85992200  | -1.52422700 |
| C | 1.12130500  | -1.91217600 | 0.35459800  |
| C | -0.86109200 | 0.40889500  | -1.04882400 |
| C | -2.32617100 | 3.54389400  | 0.13657700  |
| H | -3.30740200 | 3.14722600  | 0.36738900  |
| C | -1.35151800 | 1.15179500  | 0.18371200  |
| C | -5.03993900 | 0.20962900  | -0.21137900 |
| H | -5.77355900 | 0.14348900  | -1.00901700 |
| C | -0.40290900 | 0.07980300  | -3.24163800 |
| C | -3.58358600 | -3.20327400 | 0.64460000  |
| H | -4.54767600 | -3.24089900 | 0.14831300  |
| C | -3.42589600 | -3.75813900 | 1.91481700  |
| H | -4.26535900 | -4.23623900 | 2.41003500  |
| C | 3.25495600  | 3.08590900  | 1.94204000  |
| H | 3.25475800  | 3.77588900  | 2.77933600  |
| C | -2.15124100 | 4.92392200  | 0.00133300  |
| H | -3.00246500 | 5.58596500  | 0.12743200  |
| C | -2.18287200 | -3.68861300 | 2.55148600  |
| H | -2.05457900 | -4.11317700 | 3.54256900  |
| C | -3.13887000 | 0.38019500  | 1.82103600  |
| H | -2.39262300 | 0.43393000  | 2.60260000  |
| C | -0.89326500 | 5.44955900  | -0.28981600 |
| H | -0.75945600 | 6.52191600  | -0.39327900 |
| C | -5.39352000 | -0.12288900 | 1.09779900  |
| H | -6.40335300 | -0.45087400 | 1.32422600  |
| C | 3.53759500  | 2.61956200  | -0.44056800 |
| H | 3.76282500  | 2.99408600  | -1.43403800 |
| C | 0.34371700  | -0.87679000 | -5.29141700 |
| H | 0.50551500  | -0.81192500 | -6.36282800 |
| C | -0.21395600 | 0.20696500  | -4.62093300 |
| H | -0.48846300 | 1.11667600  | -5.14538900 |
| C | -4.43887100 | -0.03584400 | 2.11046300  |
| H | -4.70180800 | -0.30010900 | 3.13018700  |
| C | 0.71062900  | -2.05559800 | -4.60697300 |
| H | 1.15132500  | -2.87599900 | -5.16484900 |



|   |             |            |            |
|---|-------------|------------|------------|
| C | 3.54136600  | 3.51483500 | 0.65110400 |
| H | 3.77131800  | 4.56144700 | 0.47905500 |
| O | -0.54257100 | 0.78249700 | 1.30728200 |
| H | 0.38797400  | 0.88406400 | 1.05781500 |
